# Supplementary material for: Threat intensity shapes cortical engram architecture supporting remote memory retrieval
Source: Research Square preprint supplement (doi:10.21203/rs.3.rs-6920860/v1), 2025-06-26
Supplement: Supplementary file 1 [file 9f1055f90b7ab8d3ee3b339c.xlsx]

## Sheet: Fig. 1
Fig. 1
Panel c				Panel e				Panel f
group	Animal	Fos+ of Nissl (%)		group	Animal	Freezing (%)		group	Animal	Freezing (%)
CTC+4TM	10	4.8		mCherry	TRD1	74.6252		mCherry	TRD21	71.1944
	14	2.97			TRD2	69.0172			TRD22	95.2221
	16	3.92			TRD3	83.6202			TRD23	82.2778
	18	3.72			TRD4	87.4792			TRD24	88.4445
					TRD11	75.1805			TRD25	83.5278
average		3.8525			TRD12	80.1389			TRD31	69.7778
sem		0.37624			TRD13	67.6569			TRD32	92.1389
					TRD14	69.739			TRD33	74.4722
group	Animal	Fos+ of Nissl (%)			TRD15	75.7357			TRD34	53.2777
HC+4TM	9	1.86							TRD35	84.5556
	11	1.79
	13	1.6		average		75.9103		average		79.4889
	15	2.43		sem		2.258		sem		3.96207
				group	Animal	Freezing (%)		group	Animal	Freezing (%)
				hM4Di	TRD6	69.4892		hM4Di	TRD26	91.6944
average		1.92			TRD7	80.8162			TRD27	85.3611
sem		0.178652			TRD8	52.3598			TRD29	77.7778
					TRD9	40.533			TRD30	73.1666
group	Animal	Fos+ of Nissl (%)			TRD10	52.5819			TRD36	70.3889
HC-4TM	19	0			TRD16	69.8778			TRD38	82.1666
	20	0.1			TRD17	77.7068			TRD39	89.75
	21	0.79			TRD18	46.8351			TRD40	89.8056
	22	0.58			TRD19	30.844
					TRD20	73.0428
				average		59.4087		average		82.5139
average		0.3675		sem		5.39221		sem		2.84999
sem		0.189357

## Sheet: Fig. 2
Fig. 2
Panel c	See Table S1
Panel e	See Table S1
Panel g	See Table S2
Panel i	See Table S2
Panel d
1US CFC recent timepoint - Action potential frequency (Hz) in response to different intensities of injected current (pA)
Group	Cell	0pA	20pA	40pA	60pA	80pA	100pA	120pA	140pA	160pA	180pA	200pA	220pA	240pA	260pA	280pA	300pA	320pA	340pA	360pA	380pA	400pA	420pA	440pA	460pA	480pA
tdTom-	190924-04	0	0	0	0	0	1.33333	5.08341	8.82614	11.4789	14.4551	17.7248	19.9583	22.4065	24.5226	27.1062	29.4148	31.002	32.8572	33.8677	35.9809	37.1841	38.6074	39.9293	40.7538	42.0921
	190924-06	0	0	0	0	0	0	0	0	0	0	1.33333	7.26619	10.7121	14.5861	16.7986	19.796	22.8801	24.4461	26.5307	28.8472	31.0602	33.3743	34.0892	35.538	38.3926
	190924-08	0	0	0	0	0	0	5.61429	10.1814	12.5483	15.6247	17.9468	21.9867	24.5111	26.4247	29.0517	31.6031	34.1875	35.8818	38.1875	39.336	40.8646	42.3336	43.2221	45.3205	46.244
	190924-11	0	0	0	0	7.40293	12.6213	16.981	20.9547	25.0643	28.6236	32.647	34.8329	37.6245	40.0318	41.1921	43.0188	44.9904	46.6533	47.9727	49.3352	50.2584	52.0837	53.8175	54.3472	55.8014
	190925-04	0	0	0	0	0	4.84739	17.8627	22.7337	24.4736	26.6196	28.9521	30.4699	32.4505	34.5441	36.4135	38.5489	39.515	41.4097	42.2982	42.927	44.8673	45.6254	46.5911	47.5003	48.2556
	190925-06	0	0	0	0	0	7.02315	11.2524	14.0127	16.9082	19.6004	21.7229	24.1134	25.4816	27.7821	29.7371	31.4205	33.0201	34.9941	35.5256	37.1042	38.7116	39.1138	40.0704	41.2418	42.3064
	190925-08	0	0	4.86363	11.0265	17.3912	22.7273	26.3792	30.6166	33.8991	36.8807	40.2061	42.7862	45.3486	47.5711	49.4386	50.6434	52.3936	54.2838	56.604	58.9927	60.4984	62.5158	63.7858	65.6512	67.6558
	190925-10	0	0	0	0	5.10088	9.28139	12.3978	15.0296	17.5407	19.3864	21.7694	23.6315	25.8477	27.2594	28.6807	30.1306	31.54	32.8242	33.8945	35.6009	36.7319	37.6009	38.5059	39.1158	39.77
	190926-02	0	0	0	5.87522	9.96838	14.1785	18.1367	20.7865	23.222	24.2785	26.4021	27.7603	28.9578	30.5522	31.8407	32.9929	32.631	33.7369	34.9168	35.1899	36.124	38.4665	38.2474	39.5267	39.1295
	190926-04	0	0	0	6.22017	9.58296	13.0006	15.7233	18.1478	20.3557	22.3926	24.0417	25.6927	27.3197	28.4595	29.2811	30.1201	32.2061	33.1871	33.621	33.8415	35.0619	35.8489	35.4622	36.0481	36.8147
	190926-08	0	0	0	0	0	1.33333	6.30368	9.83069	13.4014	16.2712	19.1064	21.9126	24.1878	26.2989	27.5424	29.5934	30.634	31.9174	33.5889	34.1185	35.3379	36.149	37.0899	37.0915	38.6391
	190926-10	0	0	0	7.99644	14.3986	22.4364	25.4506	30.2906	33.488	36.8318	39.2176	40.2925	41.3548	42.938	44.6497	45.0349	45.191	51.9089
	190927-02	0	0	0	0	4.05835	12.2343	18.5525	21.4757	26.3587	30.4164	32.0112	33.4706	36.8277	37.1608	40.6608	43.1631	42.7968	44.6349	46.8171	47.574	47.2261	48.1818	50.1849	50.7889	51.7082
	190927-04	0	0	0	0	4.47868	8.63373	10.916	13.9518	16.4046	18.8588	20.586	23.0856	25.0087	26.4339	28.3209	30.036	32.0633	33.0987	34.8656	35.4895	37.1011	38.3265	39.3323	40.1127	41.3041
	190927-07	0	0	4.75447	7.82414	10.2699	13.1149	15.7884	17.4338	19.61	21.999	23.289	25.3066	26.94	28.739	29.7418	30.9439	31.9994	33.2977	34.4745	35.1986	36.2967	37.8841	37.8936	38.7918	39.3705
	190927-10	0	0	0	0	5.97654	8.65469	11.5858	14.3702	17.4108	19.7453	22.1051	23.9806	26.5928	29.1145	31.0719	32.6763	33.9292	37.578	37.9274	39.7082	41.177	42.5468	43.1431	44.2546	46.015
	190927-12	0	0	0	0	0	0	0	5.88028	9.36764	11.8921	14.3232	16.3315	19.2037	21.2633	24.022	26.5077	28.1166	30.5682	32.1212	33.9047	35.7101	36.8425	38.1887	39.8221	41.4981
average		0	0	0.565771	2.29073	5.21344	8.90708	12.8252	16.1484	18.9137	21.4045	23.7285	26.0516	28.2809	30.2166	32.0912	33.8614	35.2409	37.2516	37.7008	38.9468	40.2632	41.5938	42.4721	43.4941	44.6873
sem		0	0	0.387385	0.921049	1.35237	1.75126	1.87399	1.95584	2.07556	2.20367	2.26506	2.08194	2.03553	1.96336	1.94903	1.87182	1.78274	1.92695	1.84497	1.87202	1.83053	1.85617	1.9406	1.97501	2.01332
Group	Cell	0pA	20pA	40pA	60pA	80pA	100pA	120pA	140pA	160pA	180pA	200pA	220pA	240pA	260pA	280pA	300pA	320pA	340pA	360pA	380pA	400pA	420pA	440pA	460pA	480pA
tdTom+	190924-03	0	0	0	0	4.26268	8.99147	13.0464	16.7293	20.3495	24.0581	27.1044	28.9124	32.2745	35.0768	37.4646	39.3007	41.695	43.0452	45.0323	46.6148	49.1901	50.2277	51.3954	53.0033	53.818
	190924-05	0	0	0	0	8.15501	11.9467	16.8481	21.2475	25.7111	29.0963	32.5736	36.3356	37.977	41.7306	44.1193	46.9365	48.5118	50.7508	53.7457	55.822	57.5872	59.9585	62.2547	64.4757	67.4416
	190924-07	0	0	0	0	1.33333	6.33554	10.1219	12.8396	16.525	18.955	22.1912	25.0062	27.0774	28.3652	30.1887	32.5014	34.2854	36.0954	37.4748	38.9707	40.1171	40.8942	41.9397	43.2719	44.1139
	190924-10	0	0	0	0	5.78599	10.378	14.5996	18.7656	22.7071	26.1115	29.598	32.3654	34.1786	36.746	38.4204	39.9268	41.7636	43.625	45.3943	47.1558	49.1159	49.9056	50.8325	51.8001	53.3069
	190925-03	0	0	5.93824	16.3645	19.247	21.5227	24.7347	27.5391	30.2994	32.5213	34.133	35.3269	37.4675	38.8278	39.9098	40.8818	41.7751	42.3322	42.0851	43.9952	44.7977	45.0548	45.944	46.1513	46.9411
	190925-05	0	0	5.79631	9.44739	12.8833	15.6367	18.7421	21.7431	24.5754	27.1815	29.3756	31.784	34.4767	35.6615	37.7001	39.7855	41.3819	42.4784	43.7677	44.8915	47.1472	48.6521	49.4802	51.6805	52.7728
	190925-07	0	0	0	0	0	7.34403	10.2634	13.1948	15.7578	18.1523	19.9584	22.3051	24.5293	26.1613	27.5105	29.6952	30.8965	32.5802	33.9571	35.0766	36.3756	37.815	39.5241	39.5922	41.1406
	190925-09	0	0	0	0	0	8.9504	13.278	15.8555	18.5167	21.3782	23.8226	25.4943	27.0418	28.7206	29.895	31.5616	32.4703	33.5752	34.8511	35.09	36.1415	36.9373	37.6607	39.7407	38.8868
	190926-01	0	0	0	5.02061	9.46471	12.8295	15.3074	17.9508	20.2105	21.6717	23.0795	24.9687	26.3713	27.4669	28.7865	29.8376	30.148	30.9854	32.2008	32.8001	32.9683	34.0829	34.4877	35.0009	35.5556
	190926-03	0	0	0	0	0	7.31948	11.2668	15.0766	18.3149	21.4906	23.8158	25.5902	28.4151	30.3358	31.6218	33.7285	35.6236	37.1502	38.0979	38.9841	40.5012	42.1997	43.5903	43.8357	45.5327
	190926-07	0	0	0	0	0	0	0	0	0	5.00001	10.3882	13.7625	17.5477	20.5201	23.0387	26.1368	28.9722	29.6495	32.2393	33.9092	35.3737	36.8762	38.5877	40.0107	40.7275
	190926-09	0	0	0	0	0	0	0	1.33333	5.78066	10.1022	13.4794	16.8209	19.9939	24.3758	26.5338	28.6581	31.3579	33.088	35.0835	36.6175	38.2795	40.4127	41.9355	43.2155	44.3289
	190927-01	0	0	0	0	0	0	0	1.33333	7.80536	11.1347	13.9494	17.0809	19.3696	22.1905	24.1726	26.6749	28.3724	30.5013	31.9275	32.7519	34.3045	35.984	37.0814	38.3273	39.2102
	190927-03	0	0	0	0	5.78271	8.75744	11.1363	13.1528	15.7917	17.6737	19.6571	22.0434	23.4757	25.3588	27.2173	29.3545	30.9478	32.9568	33.8783	35.2603	36.8068	38.1909	39.1302	40.4328	41.423
	190927-06	0	0	0	0	0	5.02313	9.06089	12.5356	15.4256	17.9918	20.0828	21.8895	24.1153	25.5432	26.9286	28.4991	30.0009	31.1979	32.2935	33.5135	34.6029	35.6063	36.4043	37.2597	38.2415
	190927-09	0	0	0	0	6.02558	9.67125	13.3364	16.295	19.4432	22.3706	26.1732	27.2708	29.7905	32.2935	34.6724	36.6642	38.7953	40.5428	42.4424	43.3772	45.4596
	190927-11	0	0	0	0	0	0	0	0	0	0	4.71517	9.60062	13.0696	16.1201	18.5601	21.144	23.9718	26.0728	28.7357	30.637	31.7655	34.1789	36.3839	38.4697	40.1669
average		0	0	0.690268	1.81368	4.29061	7.9239	10.6907	13.2701	16.3067	19.1112	22.0057	24.5034	26.8924	29.1467	30.9847	33.0169	34.7629	36.2722	37.8357	39.1451	40.6197	41.686	42.9145	44.1417	45.2255
sem		0	0	0.472633	1.09534	1.35951	1.43411	1.73276	1.97421	2.06529	2.0647	1.9239	1.78946	1.70733	1.66481	1.65126	1.61261	1.57817	1.58204	1.59895	1.64911	1.73196	1.8181	1.85463	1.91596	2.03136
Panel f
1US CFC remote timepoint - Action potential frequency (Hz) in response to different intensities of injected current (pA)
Group	Cell	0pA	20pA	40pA	60pA	80pA	100pA	120pA	140pA	160pA	180pA	200pA	220pA	240pA	260pA	280pA	300pA	320pA	340pA	360pA	380pA	400pA	420pA	440pA	460pA	480pA
tdTom-	191021-03	0	0	0	4.89974	8.19104	11.9167	14.4062	17.2817	19.8346	21.6813	23.7704	25.0681	26.5267	27.5767	29.2409	29.7788	30.7289	32.2371	32.4855	33.2937	33.4781	34.3255	34.7784	34.8099	34.5333
	191021-05	0	3.2305	8.92836	12.8044	17.5845	21.6645	25.9258	29.0508	31.8493	35.1207	37.344	39.4991	41.8093	43.395	44.8655	45.1893	47.1361	48.2319	48.2846	49.6824	49.9598	50.9401	51.0191	51.4048	51.1446
	191021-09	0	0	0	0	3.9154	8.93627	12.2231	16.0152	19.1666	21.9557	23.9119	26.445	27.6877	30.1098	31.1789	32.4659	33.9155	36.0396	36.5025	37.8065	38.8687	40.0473	41.0514	41.8076	42.5486
	191022-02	0	0	0	0	0	0	0	5.35202	8.17997	10.6945	13.4863	16.2504	17.4983	19.6239	21.96	22.3441	23.9852	25.2292	26.5384	27.54	28.9689	29.8777	30.8031	31.3697	32.413
	191022-04	0	0	0	1.33333	6.84361	10.385	13.5996	17.0571	20.0862	22.0757	24.6499	26.3672	27.9637	30.1675	32.049	32.8767	34.1263	35.2409	36.707	37.2243	38.4407	39.368	40.0888	41.4016	41.6713
	191022-05	0	0	0	1.33333	10.4435	14.9884	18.6476	20.8373	24.8589	28.4338	30.3146	33.0203	34.4583	35.9186	37.0164	38.2291	39.7806	39.9293	40.0971	41.2003	42.0083	42.9849	42.1025	43.054	45.9191
	191022-07	0	0	0	0	4.34886	8.84499	12.9522	17.1603	20.0712	23.6417	28.4121	30.9658	32.0043	34.5746	35.8326	37.1288	39.1122	40.2971	41.4742	43.2203	44.0917	45.4642	46.3707	46.9382	47.5654
	191022-08	0	0	0	0	0	0	1.33333	10.1268	13.9726	17.7669	21.2234	23.8585	25.9356	25.9653	28.6509	30.452	32.0232	32.8072	33.7038	35.2558	35.93	36.9984	37.1652	39.0984	39.268
	191023-03	0	0	0	0	18.0917	15.5645	17.6598	20.8248	22.4148	25.764	28.0893	29.751	31.0604	32.7851	35.0866	35.5743	37.7578	37.6216	39.1497	39.807	40.5751	41.2031	40.844	42.3004	42.8588
	191023-05	0	0	0	0	0	0	0	0	3.53277	8.8636	12.78	17.5648	21.4304	23.4725	26.296	27.6486	30.0544	33.8685	35.0787	35.671	38.087	38.5692	40.0321	40.6764	42.433
	191023-07	0	0	0	0	0	0	3.84947	7.91769	12.4844	15.8654	18.1989	21.7925	24.0044	26.464	28.9778	31.0497	33.1425	35.0901	36.1628	36.8554	38.5183	39.2802	40.4109	40.9364	42.3661
	191023-09	0	0	5.75046	9.97567	13.2208	16.569	19.3189	21.7158	24.2262	26.9018	28.7274	30.6874	32.6712	33.3862	35.2439	36.7233	38.0199	39.388	40.2768	41.6247	42.746	43.6733	43.6756	44.5533	45.4832
	191024-05	0	0	7.10477	11.4051	15.536	19.1832	21.8851	25.3592	28.434	30.4421	32.7162	34.1448	36.4538	37.4498	38.9927	40.0522	41.871	42.2198	42.5601	44.2604	44.5801	46.038	46.941	47.5271	48.632
average		0	0.2485	1.67566	3.21166	7.55196	9.85019	12.4463	16.0537	19.1624	22.2467	24.8942	27.3396	29.1926	30.8376	32.7224	33.8087	35.5118	36.7846	37.617	38.7263	39.7117	40.6746	41.1756	41.9906	42.8336
sem		0	0.2485	0.901421	1.3564	1.90899	2.15636	2.39706	2.27941	2.1987	2.08928	1.9941	1.83435	1.80552	1.76496	1.65931	1.63662	1.65223	1.54966	1.48431	1.53835	1.47216	1.49908	1.4589	1.44892	1.46242
Group	Cell	0pA	20pA	40pA	60pA	80pA	100pA	120pA	140pA	160pA	180pA	200pA	220pA	240pA	260pA	280pA	300pA	320pA	340pA	360pA	380pA	400pA	420pA	440pA	460pA	480pA
tdTom+	191021-01	0	0	0	0	0	0	2.58431	6.57467	9.40436	12.5459	14.8254	17.1432	18.7094	20.4994	22.1469	23.7391	26.1342	26.7123	28.1929	29.7362	30.1215	31.7396	32.6209	33.5839	34.1516
	191021-02	0	0	0	9.46542	16.3569	22.1787	27.3076	31.4378	35.4697	39.1151	42.7399	46.2739	48.7576	51.0906	54.0097	56.0269	58.7682	61.799	63.5577	65.9629	67.7918
	191021-04	0	0	3.15706	6.95265	9.80738	12.7747	15.3866	18.344	20.6489	22.6896	25.2997	28.3856	30.3779	31.3406	33.6871	34.6093	36.1165	37.6734	38.1765	39.8128	40.8177	41.1815	41.769	43.3038	43.4748
	191021-08	0	0	0	1.33333	6.13752	10.1089	13.4825	16.9723	20.0522	22.4076	25.6828	27.6988	30.0682	32.6532	34.2635	36.2197	38.2935	39.6316	41.1134	42.3401	43.756	46.24	46.4602	47.5933	48.7449
	191022-01	0	0	0	0	4.16296	6.76896	9.39526	11.4532	13.6374	14.9665	16.851	18.9164	20.8263	21.9211	23.9833	25.1535	27.1691	27.9671	29.6084	31.0562	32.2287	33.2151	34.6762	35.4356	36.5435
	191022-03	0	0	0	0	0	5.81846	9.62626	12.3067	15.2457	17.5515	20.1939	22.5153	24.468	25.9899	27.953	29.8038	30.951	32.4883	33.6292	35.1392	36.05	37.0029	37.7746	38.937	39.6058
	191022-06	0	0	0	2.95029	7.79199	10.751	13.4187	16.1923	18.6142	21.1495	24.2888	26.8218	28.8203	30.9205	32.4024	35.0315	36.9345	37.8196	39.0511	40.8121	41.8653	43.3007	44.2854	45.389	46.6944
	191022-09	0	0	0	5.63189	8.34447	10.9728	13.4793	15.8807	18.0535	20.024	21.1254	22.5283	23.7144	24.8821	26.354	26.85	27.8953	28.6778	29.2569	29.6197	30.8862	31.4152	31.7208	32.1082	32.8665
	191023-02	0	0	4.03116	9.25398	13.7034	18.4408	21.4263	24.6416	27.7623	30.5238	31.9483	35.1853	36.7576	38.5974	41.2627	41.9425	43.4976	44.1921	45.585	47.7454	48.3628	49.7161	50.5766	51.2196
	191023-04	0	0	0	0	0	0	1.33333	1.33333	6.14544	9.23218	13.3028	15.5994	18.3344	20.0656	21.7928	23.8987	25.7192	28.015	29.0041	29.5791	31.0794	33.192	34.2041	34.5688	35.1998
	191023-06	0	0	0	0	8.52465	12.8596	16.1185	18.3484	20.5061	22.7935	24.113	26.0129	27.5429	29.7719	30.6415	31.9084	33.5586	33.8784	34.0105	35.6369	36.7325	37.4763	37.9229	38.9141	39.4581
	191023-08	0	0	4.96427	10.5312	13.6498	16.911	19.916	22.7799	25.5319	27.4517	29.64	31.3821	33.2734	34.4448	35.7893	37.4802	38.4501	39.6529	40.2438	41.6959	42.2636	43.1868	44.1307	44.9536	45.8423
	191024-04	0	0	0	0	6.81102	10.271	14.2237	17.3623	20.1763	22.4533	24.251	26.2434	27.8993	29.4922	31.1371	32.3854	33.091	34.3336	35.3178	36.6247	37.3469	38.2487	39.218	40.0968	41.0253
	191024-06	0	0	0	4.75495	7.57647	11.1771	15.1445	15.9863	20.0079	21.6893	24.094	26.2444	27.7802	28.8422	30.6556	32.5982	33.8866	35.0777	36.6063	37.1735	37.6593	38.0755	39.2313	40.8271	41.4748
average		0	0	0.868036	3.63384	7.34762	10.6452	13.7745	16.401	19.3754	21.7567	24.1683	26.4965	28.3807	30.0365	31.8628	33.4034	35.0332	36.2799	37.3824	38.781	39.783	38.7685	39.5839	40.5331	40.4235
sem		0	0	0.470635	1.08542	1.37445	1.67116	1.82515	1.97351	1.95896	1.9922	1.99301	2.08511	2.10477	2.15638	2.23686	2.25444	2.30235	2.4052	2.44654	2.55278	2.59379	1.58622	1.57159	1.60352	1.47991
Panel h
3US CFC recent timepoint - Action potential frequency (Hz) in response to different intensities of injected current (pA)
Group	Cell	0pA	20pA	40pA	60pA	80pA	100pA	120pA	140pA	160pA	180pA	200pA	220pA	240pA	260pA	280pA	300pA	320pA	340pA	360pA	380pA	400pA	420pA	440pA	460pA	480pA
tdTom-	220429-02	0	0	0	4.81885	8.65333	11.7758	14.6599	17.3353	20.4379	22.0437	24.5011	26.1376	28.4216	30.0045	31.1248	31.78	33.1922	33.7473	35.367	35.9191	36.2118	37.1619	37.4228	38.4181	38.688
	220429-05	0	0	1.33333	7.01498	9.64961	12.1022	14.7614	17.4613	19.1024	20.8974	22.6329	23.7929	24.3501	25.9601	26.975	27.611	28.7757	29.4106	30.0157	30.2671	30.3998	30.951	31.4301	31.5119	32.4483
	220429-07	0	0	0	0	0	4.92271	8.44379	11.6275	13.4482	15.2405	17.2711	18.6843	20.2173	21.627	22.7172	24.1343	24.4366	25.7103	26.3624	27.8095	28.3137	28.9072	29.7861	29.7541	30.4932
	220429-10	0	0	0	1.33333	5.78861	8.46283	10.582	12.6267	14.8494	16.3414	18.2315	19.9054	21.233	21.9391	23.1095	24.2265	25.2114	26.0868	26.9979	27.3723	28.0536	28.1848	28.8407	29.6327	30.0414
	220429-11	0	0	4.53948	7.86579	11.0135	14.0793	16.4784	18.4729	20.549	22.533	23.1765	24.3273	25.2126	26.0058	26.838	27.2662	27.9202	28.5506	29.6316	29.6627	30.44	30.8128	30.9748	31.2373	31.7939
	220430-03	0	0	0	0	0	0	0	3.45747	7.26954	8.73449	12.8872	14.7166	17.3056	19.0169	21.472	23.9639	26.2254	27.4677	29.3797	29.8706	31.9713	32.3995	33.3761	35.0941	35.6031
	220430-05	0	0	0	0	4.51304	6.67876	10.7896	13.3386	16.2799	17.9907	20.2081	23.1776	24.7395	26.9095	28.2616	29.7674	31.0364	32.7755	33.7868	33.8489	34.7438	35.3107	36.0213	36.733	36.8801
	220430-07	0	0	0	0	4.09266	7.79424	10.0352	12.5217	14.4642	16.8847	18.1049	19.509	20.8114	21.9386	22.7022	23.7785	24.2677	24.9917	25.799	26.1484	26.608	27.4234	28.0866	28.5112	28.6359
	220430-09	0	0	0	0	6.33165	10.3271	13.1943	16.1918	19.7084	22.1562	24.3401	26.2913	30.2275	31.0275	32.9994	34.0856	35.7622	36.1588	36.4255	37.8197	38.6893	39.4353	39.1689	40.3851	40.3873
	220505-02	0	0	1.33333	4.98599	8.24794	10.4818	13.2331	16.0776	18.3878	20.5413	22.6893	24.7672	26.6633	28.3098	29.7722	31.4752	32.7643	33.2417	34.0409	34.748	35.5635	36.7706	37.0731	37.7226	38.2368
	220505-04	0	0	0	0	0	0	0	0	2.47795	7.63198	12.5168	15.4625	17.465	20.876	23.3385	26.7874	27.8937	28.8393	31.59	33.4929	35.5806	36.6467	37.9339	38.8612	39.72
	220505-06	0	0	0	0	0	4.22495	8.10653	11.8236	14.3138	17.0002	19.2022	21.7622	23.6046	24.589	26.0979	27.3118	28.8959	30.3861	31.0293	32.1924	32.8385	33.7269	34.0969	34.6678	35.0924
	220505-08	0	0	0	0	1.33333	4.78244	7.304	10.9911	13.5742	15.9265	17.5769	20.7462	21.5912	23.5784	25.0147	26.9454	28.6156	29.5068	30.1233	31.0488	32.5285	33.1484	33.9182	33.9315	34.9931
	220505-10	0	0	0	0	4.98972	9.33649	12.3944	15.2328	18.2433	20.174	22.0359	24.6521	26.6085	27.7901	29.4811	31.4284	31.6621	32.9323	34.001	34.8462	35.8454	36.19	36.8464	37.5571	38.3973
average		0	0	0.514724	1.8585	4.61524	7.49776	9.99876	12.6542	15.2219	17.4354	19.6696	21.7094	23.4608	24.9695	26.4217	27.8973	29.0471	29.9861	31.0393	31.789	32.6991	33.3621	33.9269	34.5727	35.1008
sem		0	0	0.335232	0.786506	1.03908	1.15299	1.34038	1.40538	1.37499	1.23934	1.03051	0.989123	1.03751	0.968725	0.950576	0.893104	0.927436	0.902313	0.894619	0.92897	0.959883	0.996861	0.969227	1.03777	1.02945
Group	Cell	0pA	20pA	40pA	60pA	80pA	100pA	120pA	140pA	160pA	180pA	200pA	220pA	240pA	260pA	280pA	300pA	320pA	340pA	360pA	380pA	400pA	420pA	440pA	460pA	480pA
tdTom+	220429-01	0	0	0	0	0	0	0	0	0	3.18688	6.13949	7.71064	10.2098	12.8049	17.2843	19.0482	22.2991	25.2754	27.2539	27.8614	29.0435	30.4732	32.0307	33.0849	34.3917
	220429-03	0	0	0	0	0	3.73106	7.81036	10.9867	13.7857	15.3993	18.2512	20.3427	21.4516	23.3675	24.4156	25.6835	26.6729	27.9496	28.5549	29.0976	29.8427	30.9671	31.7723	31.8288	32.7742
	220429-04	0	0	0	5.60694	9.26367	13.123	15.8304	18.2696	20.9863	23.1012	25.0326	26.6554	28.1036	29.3783	30.8749	31.6221	32.8015	33.5049	34.221	35.4082	35.6484	36.3227	36.7189	37.652	37.3603
	220429-06	0	0	0	5.25852	8.78531	12.1923	14.9793	17.0256	19.2433	21.6571	23.136	24.5864	26.1839	27.3432	28.4338	29.3887	29.8265	30.9247	31.8049	32.2548	32.527	32.8079	32.9518	33.5017	33.3152
	220429-08	0	0	0	0	0	0	0	0	0	3.72195	6.75582	9.84984	12.5974	14.8312	16.9822	18.6175	20.7428	22.1763	23.5832	24.1944	25.3868	26.0082	27.3985	28.3177	28.749
	220429-09	0	0	0	4.12608	8.23648	11.2323	13.7577	16.76	19.1119	20.6236	22.7889	24.1399	25.926	26.7526	28.0881	28.8778	29.6343	30.8942	31.2085	32.0809	31.8421	33.5057	33.847	33.9165	34.2705
	220430-01	0	3.85833	7.28073	10.6164	13.2718	16.8401	19.5267	21.8547	23.7979	26.6094	27.9476	29.6585	30.703	31.6737	32.4348	33.2665	33.8896	34.2217	34.6987	35.52	35.7928	36.3587	37.205	37.0514	37.5653
	220430-04	0	0	2.67695	6.30362	9.41452	12.0772	14.6208	16.7688	18.8527	20.7522	21.8453	23.201	24.8231	25.7049	26.0345	27.5279	28.0493	28.7515	28.8817	29.3114	30.1648	30.4801	31.1942	31.3216	31.8923
	220430-06	0	0	0	0	1.33333	5.85041	9.74223	12.2293	15.2879	17.1423	19.0832	21.229	22.6084	23.9908	25.2806	26.2129	27.6787	28.2518	29.6133	30.1441	30.6037	31.3871	32.0582	32.4374	32.7833
	220430-08	0	0	3.36451	6.4431	8.7053	11.3208	14.8174	16.0497	17.7242	19.6744	21.2313	22.8029	23.8	25.0834	26.1731	27.0918	28.3912	28.654	29.1934	30.2519	31.279	31.3088	32.0753	32.8447	32.6861
	220505-01	0	0	0	0	0	1.33333	3.39484	7.19039	9.99626	11.6576	13.7396	16.1587	17.4492	19.5808	21.1908	22.4139	24.2435	26.1244	27.3138	28.6304	29.8095	31.1799	31.8706	33.4198	34.6034
	220505-03	0	0	0	0	0	3.62892	8.59292	12.1291	14.8379	17.372	20.0507	21.7632	24.5387	26.0967	27.0136	28.5307	29.909	31.0278	31.5093	33.2861	33.6508	34.7816	35.1812	35.844	36.3521
	220505-05	0	0	0	0	0	0	0	0	7.3185	9.88639	15.1367	19.8779	21.7629	25.2978	27.5608	29.4336	32.1574	33.4691	35.1311	37.231	38.8491	39.0491	40.1187	41.3259	41.4095
	220505-07	0	0	0	0	2.47795	6.40257	9.23203	11.7815	14.2124	15.9249	18.4619	21.3919	22.9582	24.3717	26.4677	28.1425	29.7709	31.3061	32.903	33.5527	34.0712	35.2142	35.6996	36.6386	37.2387
	220505-09	0	0	0	0	0	0	1.33333	6.99111	10.3585	12.8817	15.3789	18.2791	20.0441	21.7103	23.5177	26.1637	27.4699	28.0988	29.6397	31.5151	32.4952	34.3503	34.3784	35.4294	36.2568
average		0	0.257222	0.888145	2.55697	4.09922	6.51546	8.9092	11.2024	13.7009	15.9727	18.3319	20.5098	22.2107	23.8659	25.4502	26.8014	28.2358	29.3754	30.3674	31.356	32.0671	32.9463	33.6334	34.3076	34.7766
sem		0	0.257222	0.533019	0.905009	1.24834	1.49914	1.71346	1.81961	1.82951	1.74148	1.58456	1.49351	1.40831	1.29314	1.12173	1.0617	0.947574	0.854968	0.815979	0.875818	0.844776	0.826897	0.789627	0.806771	0.783023
Panel j
3US CFC remote timepoint - Action potential frequency (Hz) in response to different intensities of injected current (pA)
Group	Cell	0pA	20pA	40pA	60pA	80pA	100pA	120pA	140pA	160pA	180pA	200pA	220pA	240pA	260pA	280pA	300pA	320pA	340pA	360pA	380pA	400pA	420pA	440pA	460pA	480pA
tdTom-	220516-02	0	0	0	0	5.08109	9.09003	11.2232	13.8205	12.6406	11.902	14.1912	15.6171	18.1773	20.6236	23.6156	25.8148	27.2542	28.9152	32.8709	35.0701	36.2722	37.5191	38.2691	39.437	40.516
	220516-04	0	0	0	0	1.33333	5.48312	8.51566	10.8849	13.0452	15.482	17.6885	19.9525	21.5686	23.0077	24.7066	26.6136	27.3824	28.6729	29.7064	30.7718	31.4504	32.4655	33.5109	33.7941	34.9894
	220516-06	0	0	2.29274	8.12576	11.9936	14.8793	17.1913	19.5853	21.8043	23.5646	25.0928	26.2797	27.6415	28.8651	29.6343	30.7538	31.6615	32.2815	32.6119	33.6304	34.3279	34.806	35.3002	35.3746	36.0837
	220516-08	0	0	0	4.17606	8.47351	12.0138	13.0035	16.2909	19.134	21.677	21.4429	25.5724	26.8966	28.1638	29.5749	31.781	33.0036	34.8931	35.6419	36.6168	38.0946	38.3427	38.9545	40.1266	40.6822
	220518-06	0	0	0	0	0	4.91787	6.02585	9.81444	11.9025	15.1829	18.3358	20.4175	22.8981	24.898	26.7903	28.7164	29.6356	31.0603	32.6516	33.5505	35.6257	35.8183	36.2327	37.0322	37.6503
	220518-08	0	0	0	0	0	0	0	0	4.00909	8.25705	9.89963	11.5398	14.3333	16.6242	18.7262	20.2309	22.9412	25.2443	26.2776	28.0256	29.4664	31.1382	31.6865	33.356	33.7318
	220518-10	0	0	0	1.33333	5.88186	9.75347	13.3636	16.6197	19.7128	22.4654	25.0801	26.9997	29.5364	30.8202	32.9059	32.9483	34.3168	36.1983	36.6135	37.3196	38.414	38.5595	39.467	40.4596	40.9447
	220518-12	0	0		6.4816	11.7007	13.4446	18.2233	22.0434	22.7672	25.2029	27.1186	29.4179	32.1965	34.9359	36.3916	38.7084	40.0337	41.0792	43.0032	43.766	45.3862	45.2524	46.9578	47.0808	48.5576
	220519-02	0	0	0	0	0	0	1.33333	4.01402	7.29636	9.95	13.5446	15.6261	18.0536	20.6368	22.1768	23.8319	25.0617	26.6409	28.2738	30.5718	30.6224	32.3476	33.9108	34.9435	35.433
	220519-04	0	0	0	0	0	1.33333	5.80754	8.80989	11.8188	15.0531	16.9721	19.9844	22.1701	23.5968	25.6015	27.5898	29.5632	31.1478	32.4307	33.4733	35.0809	35.8071	36.9528	37.6633	38.8964
	220519-06	0	0	0	0	0	0	0	3.54042	7.21489	10.0471	14.0743	16.4039	19.2176	22.3307	23.9171	25.4916	28.2155	29.5456	31.3515	32.4896	33.3725	35.8068	36.7449	37.4793	38.82
	220519-08	0	0	0	0	0	0	0	1.33333	4.89931	7.70837	11.1798	13.4754	17.047	18.04	20.2621	22.1981	24.5771	26.2014	27.5244	29.5691	31.5148	32.6883	34.1745	35.5412	36.3542
	220519-10	0	0	0	0	0	11.4794	15.3857	20.1076	22.5611	25.056	27.7514	29.5292	31.2286	33.2087	34.5159	35.5269	36.8263	37.5993	38.3472	39.7227	40.9552	41.5343	42.3151	42.6705	43.5388
	220523-02	0	0	0	4.52222	9.22973	13.874	18.035	20.4806	23.8071	27.0036	28.8153	31.3608	32.9834	34.929	36.5086	37.6315	38.8271	39.9339	41.072	41.9612	42.3811	43.7103	44.0798	44.9112	45.2538
average		0	0	0.176364	1.75993	3.83527	6.87635	9.15057	11.9532	14.4724	17.0394	19.3705	21.584	23.8535	25.7629	27.5234	29.1312	30.6643	32.101	33.4555	34.7527	35.926	36.8426	37.754	38.5621	39.3894
sem		0	0	0.176364	0.757178	1.27098	1.55936	1.86836	2.02784	1.88785	1.85057	1.72946	1.7518	1.65173	1.63281	1.56377	1.51477	1.42765	1.36452	1.33143	1.24693	1.25508	1.15326	1.15446	1.1072	1.1285
Group	Cell	0pA	20pA	40pA	60pA	80pA	100pA	120pA	140pA	160pA	180pA	200pA	220pA	240pA	260pA	280pA	300pA	320pA	340pA	360pA	380pA	400pA	420pA	440pA	460pA	480pA
tdTom+	220516-01	0	0	0	0	6.09813	7.81288	10.8678	15.2724	19.4328	21.6187	24.1863	25.8718	28.3443	29.4554	31.4835	32.8501	37.5745	36.9582	38.657	38.0902	39.6641	39.5391	40.9007	40.7238	42.8703
	220516-03	0	0	0	0	3.58843	6.29106	8.92071	10.7754	13.2434	15.2116	16.719	18.698	20.3115	21.6623	22.9203	24.1382	25.0992	26.409	26.9852	28.3078	29.2652	29.6888	30.2207	30.8171	31.5854
	220516-05	0	0	0	0	0	0	2.61342	5.75216	7.90149	9.8064	11.288	12.8297	13.735	15.1652	16.1851	17.4248	18.7425	19.5688	20.1981	21.6565	22.0505	22.6833	23.5753	24.072	24.571
	220516-07	0	0	0	0	1.33333	5.40437	8.424	10.7393	13.4834	16.0447	17.7894	19.6609	21.7865	23.5728	25.1849	26.7331	27.855	29.4601	30.6061	31.6316	33.224	33.3618	34.1979	35.2638	35.8186
	220518-05	0	0	0	0	0	0	1.33333	6.02142	8.82301	18.7162	15.3599	18.2657	20.2977	23.376	25.0338	27.0085	28.6859	30.3769	31.2898	32.9907	33.7748	34.1975	35.9452	35.7237	36.5682
	220518-07	0	0	0	0	0	0	0	2.46111	6.70067	9.89493	12.4071	15.8698	18.0553	20.4692	21.4856	24.4353	26.4543	27.6866	29.734	30.9435	32.1118	33.694	34.4246	36.0631	36.2031
	220518-09	0	0	0		6.03736	9.88556	12.9562	16.1894	18.7954	20.9387	23.2516	24.7509	26.3169	28.0294	29.5135	31.2068	31.6478	32.8073	33.441	34.7675	34.869	35.6334	36.2466	36.9495	37.4607
	220518-11	0	0	0	0	1.33333	6.17171	9.65076	13.6692	15.7749	18.3087	20.4385	22.7623	24.8995	26.5567	28.3414	30.4306	31.5608	33.3942	34.0528	35.333	37.2213	37.5411	38.3747	39.2726	40.1567
	220519-01	0	0	0	0	0	0	0	0	2.57334	6.76238	9.81301	13.0688	15.7968	17.9329	19.9722	21.7736	23.5277	26.3562	27.3012	28.7935	30.5877	32.3098	32.9937	33.5137	34.54
	220519-03	0	0	0	0	0	0	1.33333	5.34271	8.31551	11.4259	13.7996	16.2872	18.7336	21.0879	22.895	25.0251	27.1623	28.5666	30.0335	31.5395	32.6367	33.9801	35.5054	36.0539	37.1998
	220519-05	0	0	0	0	0	0	4.28853	5.80806	8.9594	11.7342	15.0127	17.9369	20.2914	21.8914	24.2469	25.4705	27.4546	28.5785	30.0076	31.08	32.2627	33.1881	34.446	35.8767	36.5313
	220519-07	0	0	0	0	0	3.83759	6.2779	10.3063	11.8659	13.9362	16.653	17.6185	19.7248	22.2622	23.196	24.9998	26.9308	29.7404	29.4487	31.6945	31.8228	33.981	35.132	36.0662	37.7188
	220519-09	0	0	0	0	0	3.23587	6.47577	9.40421	12.3371	15.9715	17.4911	19.8518	22.2257	23.6268	25.6518	26.8453	28.8676	30.8079	31.693	32.7989	34.3399	35.2911	36.3441	37.2832	38.6474
	220523-01	0	0	0	0	0	4.63155	8.684	12.1722	15.2223	18.8497	21.9195	24.3677	26.6738	28.9268	30.9236	33.0484	34.6734	36.068	37.6864	38.4383	39.9642	41.0671	41.8416	42.2123	43.0109
average		0	0	0	0	1.31361	3.37647	5.8447	8.85099	11.6735	14.9443	16.8663	19.1314	21.2281	23.1439	24.7881	26.5279	28.3026	29.7699	30.7953	32.0047	33.1282	34.0112	35.0106	35.7065	36.6344
sem		0	0	0	0	0.601788	0.91592	1.141	1.27825	1.27335	1.20929	1.17159	1.09509	1.11866	1.08941	1.1397	1.15134	1.24212	1.17075	1.2206	1.12961	1.19281	1.16781	1.18649	1.1695	1.228

## Sheet: Fig. 3
Fig. 3
Panel c											Panel d				Panel e
1US CFC recent timepoint - EPSC amplitude (pA) in response to incremental stimulation intensity (µA)
											Group	Cell	AMPA/NMDA		Group	Cell	PPR50	PPR100
Group	Cell	0µA	2µA	4µA	6µA	8µA	10µA	12µA	14µA		tdTom-	200410-02	1.91511		tdTom-	200410-02	1.09591	1.08756
tdTom-	200410-02	10.7807	88.3385	180.689	86.4666	258.73	292.435	386.871	509.572			200410-04	2.34954			200410-05	1.52421	1.26693
	200410-04	12.3459	30.8644	54.148	151.757	259.41	165.546	401.28	426.311			200410-05	2.045			200413-04	1.42293	1.26232
	200410-05	3.88593	61.712	79.5023	89.3217	99.4425	236.41	229.88	264.754			200413-04	2.21152			200413-05	2.13051	1.60358
	200413-04	4.81948	77.57	111.637	165.105	203.378	219.851	209.429	338.127			200413-05	1.32433			200421-04	1.47736	1.40327
	200413-05	19.8892	42.093	93.3884	179.435	236.04	405.566	428.215	471.485			200421-04	1.93987			200421-05	1.88237	1.35519
	200421-04	6.00068	43.3775	114.944	79.0162	100.795	113.762	219.965	207.191			200421-05	2.19234			200423-04	1.92918	1.46757
	200421-05	23.2691	122.736	236.099	242.502	296.157	442.476	527.762	656.286			200423-04	3.16166			200423-05	1.73832	1.43652
	200423-04	6.85458	175.949	198.815	286.925	453.799	422.981	527.534	717.274			200423-05	1.54986			200525-02	1.09945	1.03394
	200423-05	12.0338	118.875	122.05	175.731	212.521	222.57	250.847	267.193			200525-02	1.38153			200525-04	0.965771	1.46894
	200525-02	5.67166	31.1968	72.1932	169.875	148.791	186.781	256.897	333.99			200525-04	2.26368			200529-01	1.34991	1.32973
	200525-04	33.1763	295.273	415.569	433.123	364.507	526.64	532.411	NA			200529-01	1.69741			200529-04	1.27378	1.04954
	200525-06	7.40095	116.715	60.0507	69.9867	67.8366	193.508	226.628	294.205			200529-04	3.05555			200602-04	1.78142	1.34643
	200529-01	101.912	62.4176	116.228	139.653	146.563	300.952	476.868	310.787			200602-04	1.77223
	200529-04	7.42713	126.003	176.717	505.743	406.323	603.48	534.138	680.426						average		1.51316	1.31627
	200602-04	5.62053	25.8303	120.018	252.183	186.021	181.084	328.208	218.871		average		2.0614		sem		0.099729	0.0481647
											sem		0.146051
average		17.4059	94.5966	143.47	201.788	229.354	300.936	369.129	406.891						Group	Cell	PPR50	PPR100
sem		6.39488	18.3072	23.7414	32.7798	29.4316	37.6452	33.5449	46.609		Group	Cell	AMPA/NMDA		tdTom+	200410-01	1.54514	1.48215
											tdTom+	200410-01	2.84454			200410-03	1.81547	1.74722
												200410-03	1.71373			200413-01	1.2848	1.22147
Group	Cell	0µA	2µA	4µA	6µA	8µA	10µA	12µA	14µA			200413-01	2.33828			200413-02	1.51471	1.37551
tdTom+	200410-01	26.6635	57.9601	136.471	147.691	96.0388	142.197	167.971	226.657			200413-02	2.03297			200421-01	1.7669	1.26976
	200410-03	9.3865	46.9469	48.1193	52.9144	115.867	72.5149	139.623	253.342			200413-03	0.878374			200421-02	0.944224	1.36986
	200413-01	3.74456	137.286	112.552	179.624	331.131	540.017	569.102	567.274			200421-01	2.21624			200423-01	1.13724	0.907598
	200413-02	NA	62.9654	86.0217	178.37	126.248	259.298	249.991	NA			200421-02	2.31288			200423-02	1.77545	1.56781
	200413-03	9.26302	31.2564	58.4914	120.595	147.145	122.37	169.72	221.957			200421-06	2.46263			200525-01	1.56434	1.14399
	200421-01	4.73503	24.0738	48.4595	58.3599	77.5963	109.608	223.511	160.651			200423-01	1.99582			200525-03	1.48053	1.56478
	200421-02	6.31488	26.8265	52.5167	177.233	202.184	179.32	272.218	271.306			200423-02	2.15443			200525-05	1.60328	1.43279
	200421-06	6.25565	35.3221	82.0055	26.8715	121.048	102.833	226.027	222.471			200525-01	2.29428			200529-02	1.31704	1.27594
	200423-01	18.2945	62.0858	98.1361	188.333	239.355	261.213	297.182	341.902			200525-03	2.33236			200529-03	1.74079	1.65637
	200423-02	26.3313	92.759	115.879	193.911	183.638	163.721	257.24	224.089			200525-05	2.17126			200602-02	1.33983	1.31215
	200525-01	7.6567	46.4315	87.2287	58.7535	210.052	276.822	365.526	418.252			200529-02	3.11725			200602-03	1.33469	0.936171
	200525-03	20.5466	107.45	217.103	276.992	261.233	345.115	523.793	645.972			200529-03	2.39354			200602-05	1.00878	0.96552
	200525-05	30.6277	58.9692	172.962	196.794	239.854	209.195	329.607	332.99			200602-02	3.10043
	200529-02	32.1058	448.341	526.087	408.866	475.306	671.859	693.643	863.428			200602-03	3.396		average		1.44833	1.32682
	200529-03	2.5235	33.3059	43.852	162.103	320.556	378.305	695.688	469.482			200602-05	1.76999		sem		0.0675114	0.0628853
	200602-02	5.45574	33.7229	93.6363	208.177	308.911	253.852	280.471	206.149
	200602-03	13.3042	181.016	218.44	211.672	484.014	626.43	715.802	736.057		average		2.30695
	200602-05	5.87578	88.0974	62.7607	153.541	158.453	212.671	207.638	314.647		sem		0.136454
average		13.4756	87.4897	125.596	166.711	227.702	273.741	354.709	380.978
sem		2.45441	23.3991	26.7617	21.0547	28.1544	41.8667	45.8642	50.2746
Panel f											Panel g				Panel h
1US CFC remote timepoint - EPSC amplitude (pA) in response to incremental stimulation intensity (µA)
											Group	Cell	AMPA/NMDA		Group	Cell	PPR50	PPR100
Group	Cell	0µA	2µA	4µA	6µA	8µA	10µA	12µA	14µA		tdTom-	200504-04	2.42168		tdTom-	200504-04	1.58524	1.38002
tdTom-	200504-04	7.03233	191.333	290.383	316.392	247.578	270.937	391.864	368.192			200504-05	1.80743			200504-05	1.9479	1.57958
	200504-05	10.725	48.5027	115.969	114.184	263.336	216.712	394.49	412.046			200512-01	2.86422			200512-01	1.81268	1.2362
	200512-01	12.1445	127.688	120.077	371.636	529.561	752.072	675.021	688.193			200512-02	4.53109			200512-02	1.7699	1.36638
	200512-02	6.2736	128.251	155.741	211.707	126.327	202.748	148.512	288.126			200512-03	2.67547			200512-03	1.69164	1.85605
	200512-03	7.2006	92.6204	120.11	212.352	276.783	294.013	270.412	236.933			200514-02	1.67653			200512-04	1.50314	1.39198
	200512-04	8.2536	72.0436	29.4185	65.74	117.945	120.519	184.197	186.549			200514-04	2.54949			200512-05	1.49948	1.82248
	200512-05	7.49566	23.132	91.9459	29.414	146.602	154.107	252.176	278.693			200516-04	2.21014			200514-02	1.78678	1.56502
	200514-02	19.7738	73.4674	235.961	391.279	457.184	588.592	731.608	840.322			200518-02	2.20286			200516-02	1.89247	1.58075
	200514-04	33.3608	130.826	73.6402	117.581	266.728	399.457	445.591	370.945			200618-02	1.96985			200516-04	1.64191	1.18942
	200516-02	25.3137	123.584	278.098	428.131	392.067	585.756	512.35	674.182			200618-04	2.31389			200518-02	1.43252	1.53216
	200618-02	5.77942	27.2706	94.5353	79.2663	99.2507	243.111	302.623	274.078			200619-02	1.91518			200618-02	1.13202	1.05964
	200618-04	9.03335	41.9604	98.1647	120.273	213.632	237.847	297.532	423.073			200619-04	1.40529			200618-04	1.90212	1.70675
	200619-02	7.43586	58.5327	94.1428	174.812	329.167	491.388	681.006	766.818			200622-02	3.03763			200619-02	1.73078	1.18408
	200622-02	8.87869	189.256	101.29	196.013	267.797	413.364	491.566	476.87			200622-05	2.32098			200619-04	1.37019	1.16761
	200622-05	5.31632	45.8332	306.534	399.898	500.727	496.142	423.936	503.657			200624-02	1.6214			200622-02	1.12416	1.13188
	200624-02	5.73592	98.1565	208.91	229.995	304.227	380.432	403.614	594.758			200626-02	1.16947			200622-05	1.95741	1.74665
	200626-02	18.4458	139.541	98.0704	150.613	199.973	160.161	181.519	254.59			200626-04	2.07322			200624-02	0.942756	1.14835
	200626-04	9.28239	51.0283	119.109	254.338	232.464	237.173	399.745	379.811							200626-02	1.8135	1.6729
											average		2.26477			200626-04	1.39962	1.46227
average		11.5267	92.3904	146.228	214.646	276.186	346.918	399.32	445.435		sem		0.176504
sem		1.82335	12.2227	19.204	28.9908	29.8566	41.8281	40.6042	45.855						average		1.59681	1.43901
											Group	Cell	AMPA/NMDA		sem		0.0654002	0.0557892
Group	Cell	0µA	2µA	4µA	6µA	8µA	10µA	12µA	14µA		tdTom+	200504-01	1.72286
tdTom+	200504-01	6.25525	80.2859	80.8244	125.379	151.807	141.176	206.476	127.123			200504-02	2.118		Group	Cell	PPR50	PPR100
	200504-02	27.6262	106.686	107.896	174.884	340.498	448.004	384.516	353.672			200507-01	2.47197		tdTom+	200504-02	1.49659	1.30133
	200504-03	23.9191	54.8822	123.921	289.538	209.226	284.012	336.2	275.977			200507-04	2.6922			200504-03	1.23055	1.42205
	200507-01	10.8223	41.0291	35.4331	39.1645	113.341	150.755	165.164	172.918			200514-01	1.44188			200507-01	1.32651	1.06783
	200507-02	22.1432	44.7274	59.9692	91.6373	89.3973	145.874	200.945	153.373			200514-03	1.80344			200507-02	1.63419	1.31464
	200507-04	12.1938	60.4548	107.179	156.751	178.365	285.311	264.977	291.899			200516-01	3.98837			200507-04	1.41398	1.46492
	200514-01	6.29471	38.8001	94.9493	68.0203	67.181	140.066	116.245	258.811			200518-01	3.87346			200514-01	1.62391	1.38581
	200514-03	5.77691	31.3914	110.544	156.824	213.175	190.882	306.944	396.387			200618-01	1.64514			200514-03	1.97446	1.37077
	200516-01	14.7508	68.4121	136.337	286.506	190.558	389.109	330.275	459.921			200618-03	1.42226			200516-01	1.65866	1.26609
	200516-03	3.95291	78.9331	55.3931	62.5427	138.611	227.717	196.567	242.619			200619-01	3.00871			200516-03	1.89298	1.474
	200618-01	5.39446	37.0688	55.7709	62.6571	107.797	201.363	363.948	293.008			200619-03	1.61527			200518-01	1.1302	1.26908
	200618-03	7.34188	131.033	290.889	260.114	313.528	236.681	336.398	295.401			200622-01	1.54448			200618-01	1.22979	0.980765
	200619-01	6.36147	82.2332	201.932	144.908	401.177	383.206	394.686	597.966			200622-04	1.72987			200618-03	0.988891	0.920489
	200619-03	10.5628	78.8125	155.451	272.365	410.073	398.741	514.275	532.402			200624-01	2.07986			200619-01	1.95429	1.51746
	200622-01	5.39368	36.149	67.9167	77.5258	135.914	189.957	271.422	355.976			200626-01	2.53085			200619-03	1.35317	1.1074
	200622-04	7.24441	46.6904	70.2958	230.559	365.633	279.741	319.589	349.003			200626-03	2.798			200622-01	1.06831	1.06297
	200624-01	1.97396	77.9434	127.467	297.921	242.232	313.343	328.804	275.208			200626-05	1.41224			200622-04	1.58703	1.59143
	200626-01	3.70902	78.0795	88.6091	74.2866	186.296	120.066	115.816	164.474							200624-01	1.05287	1.01209
	200626-03	31.0522	68.6265	63.9202	305.68	308.042	440.884	476.307	662.314		average		2.2166			200626-01	1.36737	1.21506
	200626-05	7.91897	67.6267	75.4663	114.825	51.975	178.581	185.121	184.945		sem		0.189063			200626-03	1.46328	1.5603
																200626-05	1.12818	1.10986
average		11.0344	65.4932	105.508	164.604	210.741	257.273	290.734	322.17
sem		1.8938	5.67807	13.2013	20.825	24.8581	23.9433	24.6374	32.9662						average		1.42876	1.27072
															sem		0.06682	0.0455746
Panel i											Panel j				Panel k
3US CFC recent timepoint - EPSC amplitude (pA) in response to incremental stimulation intensity (µA)
											Group	Cell	AMPA/NMDA		Group	Cell	PPR50	PPR100
Group	Cell	0µA	2µA	4µA	6µA	8µA	10µA	12µA	14µA		tdTom-	200409-03	1.41008		tdTom-	200409-03	1.04477	0.801755
tdTom-	200409-03	6.85016	18.5717	52.813	66.7728	51.1235	88.0601	142.511	90.6143			200409-04	1.9441			200409-04	2.35398	1.29538
	200409-04	9.8998	58.9163	138.526	121.127	112.61	190.441	201.923	216.73			200411-03	1.87138			200411-03	1.73813	1.57771
	200411-03	11.0452	80.7409	197.338	284.853	332.462	462.49	470.088	722.386			200411-04	1.48201			200414-06	1.78572	1.55274
	200411-04	4.29057	51.184	31.4561	81.3661	201.169	192.73	232.794	250.76			200414-07	1.21967			200414-07	1.44511	1.55195
	200414-06	10.2512	63.1905	54.1931	93.0612	199.846	207.926	333.509	290.587			200416-05	2.7298			200416-04	1.31498	1.39786
	200414-07	10.4457	83.5535	66.8444	176.295	169.398	284.953	255.804	366.257			200416-06	1.79557			200416-05	1.39458	1.30155
	200416-04	8.00872	54.4172	210.073	267.511	256.043	240.987	310.657	391.471			200420-02	1.69028			200416-06	1.3716	1.3501
	200416-05	8.63059	64.9237	113.552	438.572	433.49	613.827	874.589	1003.74			200420-05	3.08465			200420-02	2.10229	2.04342
	200416-06	8.25717	62.1974	86.9303	188.873	310.983	421.202	360.512	375.992			200526-02	2.7598			200420-05	1.61375	1.65783
	200420-02	14.4452	228.423	165.314	253.388	306.715	228.252	439.469	368.547			200526-04	2.26231			200526-02	2.01017	1.28482
	200420-05	2.76538	105.825	93.9429	154.087	324.759	350.965	454.855	534.233							200526-04	1.2889	1.29118
	200526-02	3.49812	50.0591	107.147	121.285	207.181	377.567	414.558	569.82		average		2.0227
	200526-04	6.22343	44.0022	109.326	237.848	324.555	233.185	321.318	375.821		sem		0.184197		average		1.622	1.42552
	210325-01_02-2	5.71674	19.1647	50.9898	104.276	167.395	162.576	271.66	245.153						sem		0.111519	0.0851374
	210325-03_04-2	10.0691	23.6103	45.7979	54.7069	42.1033	81.5495	197.607	NA		Group	Cell	AMPA/NMDA
											tdTom+	200409-01	2.26154		Group	Cell	PPR50	PPR100
average		8.02647	67.252	101.616	176.268	229.322	275.781	352.124	414.437			200409-02	3.42428		tdTom+	200409-01	1.83676	1.44444
sem		0.820355	13.0702	14.3582	27.0143	28.7747	37.5582	45.3776	62.1619			200411-01	1.73055			200409-02	1.77071	1.68731
												200411-02	1.82993			200411-01	1.30664	1.26997
Group	Cell	0µA	2µA	4µA	6µA	8µA	10µA	12µA	14µA			200414-03	1.30249			200411-02	1.26086	1.58443
tdTom+	200409-01	24.1152	110.003	188.635	294.916	268.679	459.998	503.047	432.313			200414-05	2.00173			200414-03	1.45054	1.35898
	200409-02	6.88972	50.4232	54.9237	135.842	161.637	296	305.876	429.648			200416-03	2.36107			200414-05	1.11554	0.783151
	200411-02	15.2745	37.1136	113.724	82.9563	149.932	165.978	217.132	257.08			200420-01	0.726828			200416-01	1.30775	1.15253
	200411-05	4.42915	41.2129	30.5671	31.4445	82.4589	78.9378	130.521	106.097			200420-04	1.78897			200416-03	1.49406	1.47662
	200414-03	22.0726	45.6226	75.9226	56.7305	88.5927	158.917	222.718	288.487			200526-01	1.84539			200420-01	1.1157	1.03017
	200414-05	8.16889	30.174	34.7594	72.5354	170.88	163.434	113.557	187.139			200526-03	1.97255			200420-04	1.12088	1.48496
	200416-03	12.6594	39.1849	109.019	239.14	348.835	314.771	375.943	479.366							200526-01	1.85385	1.42862
	200420-01	1.5917	24.3026	21.1867	40.4682	126.834	196.725	313.213	272.923		average		1.93139			200526-03	1.69236	1.51464
	200420-03	15.7267	63.1299	75.0101	155.867	126.452	159.927	137.293	196.305		sem		0.201218
	200526-01	2.10194	140.688	143.658	308.25	402.073	552.994	585.963	415.568						average		1.4438	1.35132
	200526-03	6.08611	35.2603	96.1577	129.128	152.351	182.911	210.076	327.88						sem		0.0818471	0.0735598
	210323-01_02-1	13.2723	21.5115	34.7314	247.515	384.675	258.61	417.773	417.153
	210325-01_02-1	8.52094	21.9349	120.875	186.386	240.026	344.024	468.56	545.92
	210325-03_04-1	6.26655	27.7489	35.7447	46.1003	58.1972	105.357	118.323	317.68
average		10.5126	49.165	81.0654	144.806	197.259	245.613	294.285	333.826
sem		1.85799	9.29726	13.3377	25.8012	30.3368	36.2642	41.5824	33.3902
Panel l											Panel m				Panel n
3US CFC remote timepoint - EPSC amplitude (pA) in response to incremental stimulation intensity (µA)
											Group	Cell	AMPA/NMDA		Group	Cell	PPR50	PPR100
Group	Cell	0µA	2µA	4µA	6µA	8µA	10µA	12µA	14µA		tdTom-	200506-02	2.69905		tdTom-	200506-02	1.84042	1.50643
tdTom-	200506-02	14.9095	62.0787	112.555	93.735	268.79	241.503	296.411	356.005			200506-04	3.6152			200506-04	2.1652	1.6456
	200506-04	20.6696	116.857	217.794	221.921	322.945	489.325	505.339	459.158			200508-02	1.64122			200508-02	1.78516	1.74305
	200508-02	26.801	91.1779	168.077	133.039	232.375	213.794	329.626	386.359			200508-05	2.21726			200508-05	1.13916	1.30354
	200508-05	26.2984	387.48	548.146	631.877	745.316	733.639	820.746	896.129			200513-06	1.211			200513-06	1.61055	1.45125
	200513-06	8.71288	65.8557	190.308	245.457	206.751	280.57	242.229	338.586			200513-08	1.82403			200513-08	1.68205	1.36012
	200513-08	11.0809	42.1541	66.7414	177.025	151.257	205.175	163.134	215.914			200515-04	1.54616			200515-04	1.66952	1.29094
	200515-04	5.61162	34.6421	81.2215	200.8	216.705	297.003	285.12	385.681			200515-07	3.15311			200515-07	1.82603	1.51021
	200515-07	5.87191	78.5015	71.8661	275.363	475.702	805.531	714.741	995.459			200520-02	3.50688			200520-06	1.37061	1.57569
	200520-02	7.72124	160.704	227.937	255.953	391.998	649.771	760.611	1169.77			200520-06	2.42663			200521-05	1.7616	1.48057
	200520-06	40.0467	117.73	287.409	270.121	317.244	482.267	561.086	582.326			200521-05	3.34281			200521-07	1.81778	1.6068
	200521-03	19.773	114.195	221.004	239.16	304.815	311.296	380.519	380.483			200521-07	1.9687			200522-02	1.57509	1.47361
	200521-05	22.84	147.694	428.184	671.315	784.604	809.256	851.578	1070.28			200522-02	2.62859			200522-04	1.54639	1.10009
	200521-07	5.32871	56.9491	77.0877	28.3716	72.2382	134.959	225.818	208.229			200522-04	2.31027			200522-05	1.68755	1.44172
	200522-02	15.9499	42.8923	152.816	277.972	262.288	237.566	374.454	375.906			200522-05	2.15332
	200522-04	20.9712	140.346	187.616	202.88	122.188	223.65	308.234	281.383						average		1.67694	1.46354
	200522-05	36.4666	120.966	261.797	224.315	387.101	334.116	495.224	620.246		average		2.41628		sem		0.0638129	0.0437017
	210416-06	2.84197	63.4188	155.098	159.248	189.006	271.037	352.933	NA		sem		0.190674
															Group	Cell	PPR50	PPR100
average		17.1703	108.45	203.274	253.444	320.666	395.321	451.047	545.12		Group	Cell	AMPA/NMDA		tdTom+	200506-01	1.10367	1.04891
sem		2.67659	19.8776	31.0737	39.853	47.5192	54.206	52.9897	78.5979		tdTom+	200506-01	1.44522			200506-03	1.65007	1.66401
												200506-03	2.26074			200508-03	1.36697	1.08126
Group	Cell	0µA	2µA	4µA	6µA	8µA	10µA	12µA	14µA			200508-03	2.22023			200508-04	1.31942	1.32592
tdTom+	200506-03	16.7882	58.4884	27.5494	144.611	214.905	337.55	413.839	419.317			200508-04	1.86893			200513-04	0.948961	1.06717
	200508-01	21.2827	56.4794	270.392	309.435	572.577	666.852	652.675	736.648			200513-04	2.11039			200513-05	1.69764	1.0982
	200508-03	8.89303	88.9301	192.042	164.563	192.563	317.108	270.207	379.193			200513-05	2.67441			200513-07	1.35326	1.29689
	200508-04	5.6275	82.6532	141.952	165.554	207.169	241.264	211.067	379.581			200513-07	2.30697			200515-03	1.31506	1.15484
	200513-04	18.5233	52.6084	31.4308	126.909	127.459	128.974	217.62	198.505			200515-03	1.89408			200515-06	1.705	1.22343
	200513-05	7.26178	90.9179	77.2644	118.273	186.076	154.94	172.041	246.137			200515-06	2.54934			200520-01	1.67481	1.41714
	200513-07	31.1181	110.777	41.9233	160.381	130.634	179.275	259.456	292.061			200520-01	3.35277			200520-05	1.60304	1.79355
	200515-03	13.8354	64.4433	147.056	204.63	312.536	349.164	347.554	406.234			200520-05	2.40549			200521-04	1.53503	1.38049
	200515-06	12.055	65.714	96.9853	195.711	194.676	439.09	380.831	NA			200521-02	2.17017			200521-06	1.82175	1.56229
	200520-01	38.9688	195.788	294.791	373.479	384.189	387.59	613.266	439.52			200521-04	2.77043			200522-01	1.61348	1.35736
	200520-05	4.81018	144.497	41.2587	230.031	265.393	204.878	340.508	297.939			200521-06	2.55093			200522-03	1.00893	0.755109
	200521-02	4.63604	31.2716	32.1469	166.533	211.662	319.995	228.178	221.384			200522-01	1.2181
	200521-04	15.9882	92.8587	79.2436	415.606	428.808	376.415	573.932	821.638			200522-03	1.48663		average		1.44781	1.28177
	200521-06	4.6945	130.27	62.9523	76.3288	148.702	145.745	220.828	208.902						sem		0.0700157	0.0687904
	200522-01	6.79286	36.3449	45.4803	62.2068	193.906	237.647	301.82	321.089		average		2.2053
	200522-03	20.4191	100.264	100.699	139.591	204.969	323.78	299.78	321.452		sem		0.135964
	210416-01	4.14339	89.244	174.384	187.286	145.499	245.261	292.733	307.703
	210416-02_03-2	6.49957	47.1335	90.3803	187.877	395.3	386.952	622.657	NA
	210416-04	4.09703	25.9343	76.0969	89.851	98.3197	94.2342	95.2721	NA
	210416-05	14.4064	136.312	108.938	134.678	138.429	215.346	177.289	241.137
average		13.0421	85.0465	106.648	182.677	237.689	287.603	334.578	366.967
sem		2.13508	9.6062	17.1293	20.4139	27.2571	29.6719	36.3897	41.8462

## Sheet: Fig. 4
Fig. 4
Panel c						Panel d						Panel e						Panel f
1US CFC recent timepoint - Mean spine density per dendritic compartment						1US CFC remote timepoint - Mean spine density per dendritic compartment						3US CFC recent timepoint - Mean spine density per dendritic compartment						3US CFC remote timepoint - Mean spine density per dendritic compartment
Group	Cell	Apical tuft	Apical trunk	Basal		Group	Cell	Apical tuft	Apical trunk	Basal		Group	Cell	Apical tuft	Apical trunk	Basal		Group	Cell	Apical tuft	Apical trunk	Basal
tdTom-	200410-02	1.42822	1.29381	0.956438		tdTom-	200504-04	1.0774		0.689116		tdTom-	200409-03	0.782821	1.01528	0.892708		tdTom-	200506-02	0.90018	1.0699
	200410-04	1.20852	1.06709	0.817397			200504-05	1.034	1.17201	0.86946			200409-04		0.652994	0.71123			200506-04	1.04464	1.01485	0.721927
	200413-04	1.21054	0.992273	1.01844			200516-02	0.855753	1.05022	1.08974			200411-03	1.07104	1.6021	1.18539			200508-02	1.15846	1.21732	0.854557
	200421-04		1.44998	0.885372			200516-04	1.04264	0.969755	0.716298			200414-07	0.958375	1.34551	0.571379			200508-05	0.816586	1.38748	0.917246
	200421-05	0.881009		0.733683			200618-02	0.753115	0.756018	0.84331			200416-02	1.53079	1.31453	0.735963			200513-06	1.02876	1.56522	1.26565
	200423-03	1.48664	1.03222	0.776914			200618-04	0.852011		0.660819			200416-04	1.0741	1.45225	1.17622			200513-08	1.16488	1.17644	0.884648
	200423-04	0.960951		0.616903			200619-02	0.780399	0.986808	1.04666			200416-05	1.08854	1.34069	0.895234			200515-07	0.893547	1.16838
	200423-05	1.15252		1.0927			200619-04	1.07161	0.952282	0.979181			200416-06	1.31155	1.14111	0.809667			200520-02	0.817262	0.984265	1.02092
	200525-04	1.1344					200622-02	0.760664	0.98953	0.813323			200526-04		0.994987	0.908278			200520-06	1.01465	0.919054
	200525-06		0.893464	0.925831			200622-05	1.08219	1.0628	0.878796									200521-03	0.748494	0.882933	0.899859
	200529-01	1.35156	0.967168				200626-02		1.48229	0.85017		average		1.11674	1.20661	0.87623			200521-05	0.944848	1.74665	0.756743
	200529-04	0.899083	1.14773				200626-04	1.16332	1.31688	1.11362		sem		0.091374	0.095586	0.067854			200521-07	0.853107	1.0675	0.727259
	200602-04	1.09787		0.966964			200512-04	1.11404	1.12151	1.27003									200522-05	1.16332	1.18437
							200512-05	0.755797	1.22011	0.679013		Group	Cell	Apical tuft	Apical trunk	Basal
average		1.16466	1.10547	0.879064								tdTom+	200411-01		1.15378	1.1163		average		0.965288	1.18341	0.894312
sem		0.0610591	0.0654202	0.0453514		average		0.949457	1.09002	0.892824			200411-02	0.761935	1.28963	0.954954		sem		0.0394306	0.0698281	0.0568502
						sem		0.0435682	0.0549137	0.0494178			200411-05		0.888596	0.992035
Group	Cell	Apical tuft	Apical trunk	Basal									200414-01	0.884082	0.666366			Group	Cell	Apical tuft	Apical trunk	Basal
tdTom+	200410-01	1.19076	0.986031	0.988634		Group	Cell	Apical tuft	Apical trunk	Basal			200414-03	1.25708	1.76945	1.25097		tdTom+	200506-01	1.18951	1.2221	0.94684
	200413-01	0.670974		0.640647		tdTom+	200504-01	0.866145	1.43606	0.935875			200414-05	1.36659	1.46492	0.755385			200506-03	0.859213	1.2623
	200413-02	1.03368	1.08851	0.819104			200504-02	0.676573	0.966631	0.803125			200416-03	0.851871	1.57605	0.765872			200508-01	1.13904	1.64009	0.968621
	200413-03		1.01746	0.776911			200504-03	0.796616	0.728433	0.577329			200420-01	1.37662	1.04255	0.98299			200508-03	1.3565	1.21233	1.28604
	200421-01	0.734815	1.43649	1.05886			200507-01	0.888019	1.39261	1.07528			200420-04	1.24005	1.44692	1.12621			200508-04	1.32637	1.11028	1.13066
	200421-02	1.36965		1.04053			200507-02	0.735584	1.42226	1.16249			200526-01	0.849329	1.59126	0.847418			200513-04	1.16908	1.25057	1.34537
	200421-06		1.10168	1.15619			200507-04	1.39994	1.57289				200526-03	0.762226	1.03732	0.913426			200513-05	1.37885	1.40192	0.818254
	200423-01		0.812651	0.777176			200514-01	1.11439	1.23909	0.656264									200513-07	0.799026	1.41822	1.10381
	200423-02	1.25123		0.812136			200514-03	0.978262	1.41452	0.762192		average		1.03887	1.26608	0.970556			200515-03	0.956893	1.33065
	200423-03	1.45255	1.18043	1.14059			200516-01	0.736306	0.948734	0.949196		sem		0.0880061	0.102028	0.050726			200515-05	1.15269	1.03243	1.07264
	200525-01		1.5643	1.16892			200516-03	1.42033	1.98161	0.886112									200515-06	0.956485	0.97317
	200525-03	1.30784		0.704451			200618-01	1.38316	1.5529	1.26538									200520-02	1.31631	1.42463	1.04988
	200525-05	1.02842	1.36224	0.797524			200618-03	1.08385	1.05184	0.873799									200520-05	0.842159	1.52521	0.650889
	200529-03		1.51371	1.22783			200619-01	1.09445	1.44814	1.19065									200521-02	1.16396	1.29408	1.00663
	200602-01	1.12384	1.18428	0.993649			200619-03	1.48018	1.44632	1.23583									200521-04	0.714721	1.34825	0.713753
	200602-02	1.09425					200622-01	1.34634	1.29658	0.850557									200512-06	0.836472	1.16427	0.825886
	200602-03	1.04901		1.14777			200622-04	0.854301	1.49563	1.40515									200522-01	0.934177	0.966841	1.11438
	200602-05	1.10548		0.950964			200626-01	1.41546	1.1236	1.26734									200522-03	1.34073	1.09554	1.07603
							200626-03	1.27205	1.39477	0.954462
average		1.10865	1.20434	0.953052														average		1.07957	1.25961	1.00731
sem		0.0620438	0.0716712	0.044621		average		1.08566	1.32848	0.991238								sem		0.0515986	0.043666	0.0500376
						sem		0.0655573	0.0674419	0.0569084

## Sheet: Fig. 5
Fig. 5
		Panel b	Panel d		Panel c			Panel e					Panel g	Panel i		Panel h			Panel j
					mEPSC cum.distribution - 1US CFC remote			mEPSC cum.distribution - 1US CFC remote								mEPSC cum.distribution - 3US CFC remote			mEPSC cum.distribution - 3US CFC remote
					tdTom-	tdTom+		tdTom-	tdTom+							tdTom-	tdTom+		tdTom-	tdTom+
Group	Cell	Mean mEPSC amplitude (pA)	Mean mEPSC frequency (Hz)		mEPSC amplitude (pA)	mEPSC amplitude (pA)		mEPSC frequency (Hz)	mEPSC frequency (Hz)		Group	Cell	Mean mEPSC amplitude (pA)	Mean mEPSC frequency (Hz)		mEPSC amplitude (pA)	mEPSC amplitude (pA)		mEPSC frequency (Hz)	mEPSC frequency (Hz)
tdTom-	210127-02	12.0129	2.14212		10.071	9.155		0.863111	17.3913		tdTom-	210126-01	13.8799	7.12441		12.817	8.545		4.85437	27.8552
	210128-04	14.5559	5.56455		11.597	47.607		8.73362	13.6986			210126-04	10.6615	1.55785		8.24	10.681		2.84738	34.2466
	210128-07	11.6432	6.73091		10.986	10.376		55.2486	4.90436			210126-08	11.8475	4.91592		9.766	27.771		8.77193	2.79877
	210128-08	10.3684	2.27141		8.545	18.921		3.20307	6.64452			210129-02	12.6216	5.62502		10.986	11.597		1.86846	18.7617
	210204-02	15.9389	4.89878		16.174	25.635		4.10341	10.7181			210129-04	13.2737	3.61212		7.324	17.7		12.0919	169.492
	210204-04	10.8971	2.43186		8.85	20.142		7.93021	19.2678			210205-02	12.1739	2.32416		11.292	8.85		25.3807	1.74825
	210207-02	12.8294	2.80189		10.681	12.207		0.408764	3.17965			210205-04	13.6386	8.05962		11.597	8.24		24.3309	0.757461
	210207-04	12.1024	2.86503		9.155	13.428		2.23914	0.858885			210205-06	13.097	2.62696		7.629	13.123		3.53357	2.29621
	210207-06	20.14	1.6242		7.324	7.935		1.12867	5.83771			210206-02	16.2444	5.88028		16.174	10.071		3.63901	7.0922
	210207-07	12.65	5.71309		8.24	9.46		35.5872	21.4133			210206-04	13.1286	4.26043		13.123	20.142		17.5747	10.9529
	210209-02	12.2339	6.43645		10.681	18.921		6.50618	1.65071			210206-06	17.072	3.39023		20.447	15.869		1.44739	16.7785
	210209-04	18.4691	6.14581		12.512	13.123		28.9855	116.279			210210-04	12.7239	4.15908		7.935	13.123		17.6678	192.308
	210209-06	12.1409	6.5752		7.324	7.935		172.414	7.05716			210210-06	13.0129	3.72964		15.564	13.123		2.62055	5.4615
	210211-02	13.8025	5.85979		10.071	10.071		3.42936	55.8659			210210-09	14.0359	6.26264		8.24	7.629		11.7786	5.48847
	210211-04	15.635	5.65018		10.071	30.518		10.6724	11.4679			210506-01	11.4719	3.10752		13.428	10.986		4.92368	26.3852
	210212-02	17.2248	9.08073		8.85	7.935		5.62114	3.85654			210506-04	16.4291	2.41188		7.935	13.123		3.64166	6.18812
	210212-04	14.1378	2.97745		15.869	10.681		105.263	0.701656			210507-02	15.1441	3.033		7.935	8.24		39.3701	2.44081
	210326-02	10.5498	3.23535		7.629	15.259		1.15194	4.75285			210507-04	13.307	2.46999		9.46	10.681		7.0373	2.29568
	210326-04	10.4391	2.08057		19.226	11.597		11.7509	11.8624			210507-06	18.3001	4.7594		24.414	10.071		59.5238	1.38677
	210401-03	11.8022	3.23556		7.629	17.395		4.7259	11.1607			210624-04	10.6509	1.33658		7.324	10.376		52.356	1.21655
	210401-05	11.1485	3.16793		9.155	9.155		0.736106	7.38007							7.629	10.376		14.9925	15.0376
	210401-07	16.0438	2.09501		8.24	9.155		0.820412	28.2486		average		13.6357	4.03234		7.629	8.545		1.54369	1.46349
	210402-02	12.2528	2.56924		13.123	15.869		3.93701	1.13148		sem		0.463039	0.410287		8.24	12.817		3.42466	3.04321
	210402-04	13.3658	1.74281		12.207	13.428		1.80832	7.65111							10.681	15.869		21.0084	5.00751
	210405-02	11.5861	9.35027		8.545	9.46		17.6991	9.80392		Group	Cell	Mean mEPSC amplitude (pA)	Mean mEPSC frequency (Hz)		8.24	7.019		9.88142	20.7039
	210405-04	11.781	4.54572		8.24	8.545		14.5985	9.14077		tdTom+	210126-02	12.9971	3.83167		7.019	8.24		1.25612	9.46074
	210405-06	10.6957	5.02471		10.681	10.376		22.5225	14.2653			210126-03	12.4061	6.54527		16.174	25.94		3.55872	18.4162
	210405-08	16.5422	6.64036		16.174	7.629		19.084	38.9105			210126-05	12.3579	4.07873		10.681	11.902		1.32328	14.6843
	210406-02	14.7236	1.47074		8.545	7.935		3.9032	0.636618			210129-01	15.0724	9.109		8.85	8.85		7.21501	2.28728
	210406-04	11.5449	2.67815		8.85	14.954		2.04541	1.75685			210129-03	13.4688	1.86208		13.428	7.935		1.33869	1.67785
	210623-02	13.9233	3.17237		7.935	11.292		2.48385	1.26791			210129-05	13.5535	3.90288		21.973	15.564		2.78552	5.6338
	210623-04	12.1422	2.06526		10.071	9.766		6.29327	1.44051			210205-01	11.485	2.64037		9.766	8.24		22.0264	5.70451
	210625-02	11.8372	0.626479		12.817	8.85		4.53926	1.44697			210205-03	13.0877	5.55328		9.46	10.986		17.2712	18.1488
	210625-04	11.2619	3.24462		9.46	11.292		64.1026	23.8663			210205-05	12.8616	4.38399		9.155	9.46		14.7493	6.51466
	210625-07	11.597	2.80329		9.46	7.019		3.46861	0.425206			210206-01	12.8655	6.39897		8.24	21.362		1.47558	5.86854
	210628-02	16.375	3.17483		10.071	22.583		4.363	17.5131			210206-03	13.0223	4.15805		34.79	7.935		2.78552	9.38967
	210628-04	12.6608	2.82486		10.071	7.935		11.1982	39.5257			210206-05	15.1859	3.94551		10.681	22.278		0.828775	1.28982
					9.46	10.986		1.36556	13.6799			210210-01	15.5618	4.04948		17.09	15.869		3.37724	6.18047
average		13.2177	3.93291		18.616	12.207		2.97796	4.55996			210210-03	12.7815	3.6509		22.583	14.343		1.33067	3.74111
sem		0.393851	0.349003		8.85	16.174		5.43478	4.96278			210210-05	15.769	4.02372		10.986	11.292		22.7273	17.2712
					7.935	10.681		6.17665	25.641			210210-07	12.7484	4.81112		14.343	13.123		3.07503	14.9925
Group	Cell	Mean mEPSC amplitude (pA)	Mean mEPSC frequency (Hz)		16.479	7.935		12.6582	2.73823			210506-02	12.8243	4.47262		9.155	19.836		8.56164	2.61301
tdTom+	210127-01	18.8728	4.81413		11.597	35.4		7.72201	8.41751			210506-03	11.2201	2.60694		7.324	52.795		8.22368	14.0647
	210128-01	20.1178	7.4038		7.935	46.692		1.29216	16.129			210507-01	13.6374	4.3778		10.681	14.648		1.0201	1.58957
	210128-05	12.3481	6.08953		7.324	32.654		3.30907	3.59324			210507-03	18.6151	5.56599		9.46	19.836		10.4603	1.6372
	210128-06	12.5108	4.65222		25.635	7.629		18.018	16.2338			210507-05	10.9715	2.88213		12.817	7.019		1.97707	58.4795
	210204-01	14.1341	4.0413		8.545	17.395		4.03551	9.59693			210624-01	12.5742	1.1314		12.817	9.766		8.96861	4.67071
	210204-03	17.1399	4.66701		7.935	10.071		2.08377	0.871004			210624-03	10.2627	3.82763		9.155	9.155		8.18331	67.5676
	210207-01	13.4287	4.39581		7.019	15.564		12.6103	4.08163							13.733	13.733		3.54233	8.55432
	210207-03	14.2069	5.41301		17.7	23.499		2.91886	2.01939		average		13.2752	4.25259		27.161	12.817		3.88048	4.11353
	210207-05	14.1508	3.31227		16.785	11.597		3.82117	2.35905		sem		0.37781	0.347121		12.512	7.019		0.302352	0.908513
	210209-01	13.4222	9.4172		15.869	8.24		5.16262	50.7614							8.24	10.376		1.08932	53.1915
	210209-03	16.7765	2.35713		10.986	12.512		6.23053	7.25163							9.155	10.681		14.8368	0.850557
	210209-05	12.1747	5.23175		15.564	16.479		1.56838	6.25							17.7	12.207		5.69801	14.4718
	210211-01	15.4143	4.27411		10.681	15.564		11.7786	5.58971							13.733	13.428		4.22119	5.27704
	210211-03	12.9345	2.23734		10.376	17.09		7.49625	2.12766							10.681	7.629		0.962927	4.06504
	210212-01	15.7043	9.58281		10.986	7.629		1.59847	1.54392							9.766	7.019		20.9644	15.5521
	210212-03	12.3954	5.43216		33.875	9.46		10.9409	3.06279							7.629	23.193		7.88644	4.50045
	210326-01	14.1312	3.59171		32.959	8.85		1.20977	9.23361							10.986	28.992		2.04123	21.5517
	210326-03	14.2667	2.91326		11.292	8.85		4.04858	13.459							7.019	7.019		0.694155	1.17509
	210401-01	15.1217	4.06151		7.019	7.324		3.71195	3.95726							7.019	19.836		5.12033	10.6838
	210401-04	13.5107	2.85252		8.545	7.935		13.4771	8.67303							9.46	7.324		7.84314	61.3497
	210401-06	13.3298	3.78321		10.376	13.428		5.69152	14.0647							8.85	20.142		12.987	21.4592
	210402-01	11.1252	6.0494		11.902	8.85		7.07214	6.60066							12.817	9.46		8.95255	3.74392
	210402-03	11.0959	4.93638		9.155	15.869		27.5482	17.762							14.954	16.174		3.5791	20.3666
	210405-01	11.3859	6.42897		43.03	10.376		3.59324	35.9712							9.155	15.259		1.3725	20.9205
	210405-03	11.8967	5.9059		11.292	17.7		15.3846	8.84956							19.836	13.733		6.23053	8.82613
	210405-05	12.9671	11.0709		16.479	7.019		1.98926	28.0112							8.85	11.292		119.048	3.50018
	210405-07	13.6969	4.59995		8.24	7.324		3.28192	22.2717							39.063	8.85		5.9988	88.4956
	210406-01	13.1575	8.47508		11.597	8.85		2.02552	2.57202							7.019	52.185		4.10509	181.818
	210406-03	12.1087	1.92089		10.681	16.479		2.51762	3.64964							8.545	10.376		4.24989	5.90667
	210406-05	12.2235	5.27237		18.311	24.109		5.36193	1.58278							8.24	7.629		8.12348	13.6612
	210623-01	14.5794	1.89915		22.583	7.324		37.037	3.76932							13.733	42.725		3.55366	1.99084
	210623-03	12.1355	1.96906		21.667	12.207		3.93856	8.05802							31.738	29.907		5.76701	4.38982
	210623-05	11.9779	3.87086		8.24	31.738		0.912825	8.14996							11.902	39.063		8.81834	8.99281
	210625-01	13.8112	3.40379		17.395	35.706		21.3675	2.82646							11.902	15.259		2.46609	10.6838
	210625-05	14.1183	1.78274		7.629	11.597		2.7533	14.6413							10.376	8.545		1.62866	28.8184
	210628-01	14.4802	4.37058		11.292	14.954		59.8802	1.46391							8.85	17.395		1.05108	12.8041
	210628-03	15.6383	5.07361		19.226	18.921		2.06058	2.37023							7.019	9.46		3.73134	2.84738
					7.324	11.597		29.9401	33.1126							10.681	17.395		0.706614	7.8125
average		13.8511	4.79874		8.24	19.836		101.01	5.27704							11.292	8.545		10.846	4.36681
sem		0.329952	0.362711		14.954	9.766		11.0011	45.8716							8.85	42.419		9.85222	3.61795
					18.005	10.071		0.986485	2.38379							13.428	11.292		9.56938	2.77701
					10.681	7.019		31.5457	7.89266							22.278	10.986		11.1857	4.98008
					9.46	26.855		14.0647	3.12695							9.155	23.499		1.71851	2.19732
					32.043	16.479		14.1443	3.05717							8.545	7.629		1.54943	21.8341
					14.343	8.85		3.9185	7.61615							8.545	7.935		10.7066	3.72301
					12.817	10.071		28.0112	1.69578							7.019	7.629		2.24316	16.6389
					13.428	10.681		9.52381	15.0376							12.207	7.935		126.582	10.7066
					7.935	11.292		36.2319	25.2525							48.523	8.85		2.7972	9.65251
					7.629	14.954		1.63773	5.68505							8.24	13.123		8.84956	0.616865
					10.071	18.921		2.4564	1.39528							16.174	10.071		42.5532	9.30233
					15.869	15.564		1.13392	5.30786							8.24	9.766		14.3885	2.25378
					7.629	7.935		8.66551	4.16667							9.155	10.681		13.624	23.5294
					9.46	33.264		3.77929	1.27113							10.071	9.766		1.95046	13.6054
					9.46	8.85		1.82682	43.8596							10.376	32.959		4.5045	86.9565
					11.597	9.46		2.4325	9.0009							10.986	19.531		5.81734	4.57247
					11.292	28.992		5.32198	3.77786							9.766	21.057		2.55558	3.96825
					8.24	14.343		16.2602	5.16529							10.071	8.545		4.05186	20.9644
					9.155	10.376		1.40193	17.7305							7.629	9.155		1.57233	5.27148
					7.019	9.46		3.6036	21.9298							15.564	8.545		11.5075	34.965
					11.292	11.292		22.5225	12.87							7.324	11.597		2.59	54.3478
					9.155	9.155		50.2513	0.340681							16.785	16.174		2.99133	14.0647
					10.986	19.226		10.2775	14.3678							9.155	13.428		10.8696	5.23286
					10.681	16.479		2.03459	1.00929							7.324	16.785		49.7512	60.241
					9.46	8.545		24.5098	5.39374							9.155	35.4		0.661682	6.53595
					7.629	23.499		0.432938	7.27273							33.264	12.817		45.045	1.0247
					36.926	12.817		3.36247	15.5763							8.85	7.019		7.5815	27.1003
					8.545	35.095		2.52461	4.34783							21.667	8.24		4.29553	9.02527
					7.629	27.466		6.10874	9.04159							12.817	8.85		6.17284	7.01262
					9.766	12.817		7.94281	117.647							7.935	7.019		2.16638	3.45781
					18.616	7.935		1.25534	15.9744							12.817	14.954		1.26823	13.6986
					8.545	14.954		4.47628	7.75194							10.071	12.512		7.45156	0.885034
					9.766	7.629		4.4484	5.82751							38.452	10.986		41.3223	0.938438
					12.207	9.46		2.09644	11.7233							10.376	11.597		3.04507	1.88359
					8.24	23.193		55.5556	62.1118							14.648	13.733		1.22941	6.49773
					12.207	7.629		1.38504	42.0168							8.545	11.597		6.64894	59.8802
					12.512	10.986		2.31803	16.9492							14.038	17.395		2.1004	78.7402
					17.7	21.973		2.67451	1.35318							55.847	10.071		11.1982	4.80769
					18.005	19.226		0.9758	2.60892							7.629	15.259		27.3973	8.43882
					9.155	8.545		28.2486	4.08998							28.992	14.648		18.4843	1.00402
					7.324	10.986		13.5685	1.62549							24.414	13.428		4.15282	0.973615
					9.46	14.648		9.22509	16.5017							11.292	9.766		13.5685	9.67118
					11.292	8.545		7.65111	1.56446							24.109	9.46		29.3255	3.97141
					10.986	9.46		71.9424	2.14684							8.85	13.428		18.1488	4.17362
					44.861	10.986		13.1752	52.0833							10.376	9.766		1.25549	40
					18.005	7.935		35.9712	18.9753							8.24	34.18		3.64431	0.910498
					28.076	15.869		133.333	25.5102							7.019	26.55		15.1745	1.63399
					7.935	10.376		6.5703	1.9658							7.629	16.174		6.25782	5.82411
					7.324	21.667		1.64501	2.95334							12.207	9.46		5.56483	2.63644
					27.161	7.324		1.17661	19.2308							22.583	9.46		15.949	4.5683
					20.142	9.46		8.90472	1.41703							16.785	12.207		12.987	1.42288
					9.766	11.292		1.36593	10.7875							8.85	11.902		3.31895	2.65887
					7.324	7.324		12.5	6.12745							8.85	14.038		57.8035	31.746
					9.766	22.888		11.4416	16.8634							8.545	7.629		0.693241	50.5051
					7.324	8.85		42.5532	48.3092							17.7	8.24		8.96861	3.01114
					7.629	9.155		6.74309	10.2987							26.55	14.648		67.1141	1.8044
					13.733	25.94		5.39957	86.9565							7.324	12.817		1.91718	40.1606
					9.766	8.85		1.6603	75.188							45.776	11.597		3.9984	1.37627
					24.109	32.349		2.02552	4.78011							20.752	10.071		0.712758	18.0505
					16.785	8.545		1.41523	4.74383							9.46	16.174		8.29876	1.54679
					10.681	36.011		1.74825	33.1126							14.343	13.428		3.23206	5.37634
					7.324	19.226		1.25141	0.811227							12.207	20.447		30.6748	0.98668
					7.324	16.479		14.771	2.24165							9.766	7.629		11.4943	3.74813
					9.766	7.019		4.55166	2.4919							9.46	8.545		5.89623	16.6945
					25.024	11.292		1.60462	1.61316							10.986	11.597		0.737898	16.4474
					7.935	9.46		2.05212	13.8122							17.395	8.24		8.70322	74.6269
					7.629	14.343		1.95122	1.13753							12.512	17.395		1.0983	8.16993
					10.071	8.545		16.2866	4.39754							8.24	13.733		3.23834	0.847027
					9.155	14.954		10.4167	2.03211							10.681	18.921		70.922	9.99001
					8.24	8.545		14.7059	6.79348							11.292	10.681		2.76702	1.14299
					7.935	10.681		0.811359	5.53403							16.479	16.785		5.44959	1.93836
					7.629	8.85		1.52905	6.74764							8.24	11.597		2.75028	8.91266
					7.629	10.376		2.56805	16.5837							12.512	18.616		166.667	19.0476
					10.681	7.324		0.87804	28.6533							11.597	10.681		11.2108	5.9952
					8.85	19.836		15.9744	36.3636							13.733	12.817		45.2489	2.35349
					12.817	7.019		25.4453	5.17866							7.324	8.24		5.27148	3.25098
					25.94	10.986		11.1359	7.73994							7.324	7.935		9.31966	1.78158
					8.24	10.376		76.9231	89.2857							15.259	8.545		2.73823	4.19992
					7.935	7.935		8.4317	3.6036							9.766	9.766		0.476849	0.36361
					15.259	10.376		49.2611	22.8833							21.973	9.155		7.85546	14.245
					13.733	8.24		6.09756	2.34522							9.155	11.292		0.557507	36.7647
					9.46	7.324		13.2802	9.47867							10.071	23.804		3.16857	15.7729
					8.85	10.986		5.46747	10.5152							8.85	11.902		4.94315	11.9904
					7.629	7.935		2.18627	2.25938							11.902	10.071		2.37982	5.62114
					17.395	29.602		7.4184	1.56128							9.155	15.869		2.2242	34.7222
					10.071	18.005		5.04796	38.9105							11.292	15.259		8.05153	15.5763
					12.207	54.932		7.02247	1.3344							7.935	24.414		6.3012	0.492393
					7.629	14.954		0.627865	16.7224							68.97	9.155		6.27746	1.02785
					10.071	12.512		11.6144	6.46412							11.292	11.902		15.6006	3.72439
					34.79	14.343		97.0874	8.00641							34.79	8.85		55.8659	12.9534
					8.85	11.292		2.5	4.02253							15.564	12.817		70.922	38.61
					10.681	8.85		25.8398	7.66284							10.986	21.057		1.19689	6.8306
					7.935	10.071		7.02247	45.045							8.545	24.414		2.17675	31.8471
					14.038	11.292		2.27635	3.73134							9.46	11.597		1.51012	11.1607
					16.479	11.292		14.556	33.3333							9.766	19.226		9.15751	8.62069
					12.512	9.155		2.86123	6.87285							20.142	7.935		1.06542	64.5161
					10.986	10.071		0.592839	2.56739							8.85	11.597		2.76855	1.09302
					8.85	9.46		1.13856	6.43915							24.414	10.071		10.2249	105.263
					7.324	7.324		2.95159	0.549451							7.629	22.888		0.935891	2.50063
					9.155	9.155		6.50195	30.3951							14.343	38.757		32.4675	6.00601
					8.24	23.193		2.79018	4.38404							8.24	9.766		1.84366	14.1044
					10.681	14.038		69.9301	0.840407							7.324	7.935		7.75194	0.8036
					8.545	11.292		12.7065	3.84911							11.597	10.681		2.93255	4.58505
					10.986	8.24		1.42066	14.9925							14.954	10.376		7.84314	0.506073
					7.019	48.218		2.79799	2.63296							8.85	18.921		0.445534	10.01
					7.629	47.913		2.26757	4.52489							14.343	10.376		11.9617	3.6245
					8.545	14.954		2.30734	6.44745							15.259	9.766		1.94704	7.3692
					11.292	8.85		6.11995	27.7778							8.545	11.902		23.4742	3.24359
					9.46	17.09		10.8108	91.7431							18.005	8.545		5.32481	2.28519
					10.071	20.447		2.05846	1.25849							8.24	7.324		8.48896	1.48854
					9.155	18.005		1.32749	12.6263							8.545	8.85		4.40141	2.6824
					23.499	11.902		14.3062	1.42857							7.324	17.09		10.4822	1.74004
					10.376	20.447		0.922594	28.7356							15.869	7.629		6.21891	4.98504
					10.071	17.09		63.6943	7.85546							10.681	16.479		64.5161	6.77048
					8.85	30.212		24.0385	2.18103							16.479	8.24		5.63698	45.4545
					20.752	13.123		57.8035	2.73523							8.545	7.935		4.23729	40.1606
					12.207	8.85		30.1205	8.25083							33.569	7.629		1.40351	4.59348
					30.518	19.836		18.2149	6.93481							14.343	22.583		18.3824	1.07666
					19.531	19.531		29.6736	73.5294							14.343	7.019		0.444939	3.72717
					24.414	7.019		5.5371	8.09061							10.376	8.545		37.594	1.06033
					23.804	27.771		3.79795	1.35227							7.935	15.869		3.81825	0.924727
					12.817	9.46		10.0503	0.78734							7.935	7.324		3.90778	4.45831
					7.629	11.902		3.72162	17.3611							8.545	18.921		6.29723	35.2113
					17.395	25.024		6.11247	1.12007							10.986	7.935		29.2398	54.0541
					7.629	10.986		7.61615	7.62777							7.324	40.283		8.95255	9.90099
					8.24	9.155		16	5.87889							10.986	8.85		107.527	4.26439
					12.512	9.155		0.723641	48.5437							12.512	7.935		2.07426	6.16523
					29.297	7.935		1.3563	4.84966							7.324	12.512		7.49064	34.6021
					10.376	26.855		6.09385	37.037							15.259	7.629		3.16456	8
					9.766	7.935		7.21501	7.5188							9.155	24.414		4.42282	3.58938
					8.24	22.583		1.09625	2.10615							9.766	10.681		5.87544	2.85307
					7.629	12.207		5.9312	23.4742							9.155	26.245		1.80083	26.3852
					10.071	12.512		2.00401	10.8108							12.207	8.545		26.3852	5.47046
					8.545	16.174		18.6567	64.5161							10.071	9.155		3.44709	6.70241
					10.681	37.842		7.23589	2.77624							9.155	14.954		66.6667	5.15198
					11.902	9.46		0.595557	2.23065							7.324	9.155		4.89237	5.47945
					7.935	15.564		0.504058	7.96813							10.071	18.311		21.4592	33.557
					11.597	7.019		14.4718	25.641							25.024	10.071		20.1613	32.0513
					14.648	9.155		4.95786	0.947598							9.155	33.264		0.808407	10.5374
					9.46	15.564		3.04692	2.10704							34.79	17.7		66.6667	2.9656
					7.629	11.902		1.82448	2.70709							9.46	11.597		2.27428	1.25266
					8.545	30.823		9.56938	4.97512							10.986	7.629		20.79	8
					9.46	10.376		10.9051	4.20521							17.7	15.259		7.34754	32.2581
					14.954	7.324		68.4932	25.641							72.632	10.986		60.241	3.23625
					9.155	8.545		2.7933	15.625							7.935	27.161		4.71254	1.53516
					28.992	29.602		7.61615	1.43041							17.395	11.597		9.5511	8.74126
					7.324	8.24		1.31909	52.6316							11.597	8.85		2.13675	6.45578
					10.681	10.376		11.7233	1.15247							20.142	7.324		3.61533	8.41043
					9.155	14.954		1.52975	16.8067							12.207	8.545		1.35373	18.9394
					37.537	14.343		3.90168	4.5977							10.071	16.785		37.3134	4.60193
					15.869	11.292		0.938527	24.1546							19.226	19.836		2.11015	6.64452
					14.648	13.733		56.1798	3.78072							7.019	9.46		1.61368	23.6967
					7.935	10.376		17.762	11.8765							24.719	7.324		43.1034	5.0025
					12.512	18.311		136.986	6.80272							12.512	9.766		1.61499	9.54198
					7.629	15.869		6.93963	4.41306							7.629	9.766		1.82983	11.9617
					24.719	72.327		4.3554	6.25782							9.155	12.207		4.13394	8.02568
					20.752	7.324		3.56379	28.9017							10.071	8.24		4.29923	7.7821
					7.324	14.343		2.54453	8.1367							11.597	16.479		37.3134	1.75932
					7.629	34.485		3.43053	51.5464							7.629	11.292		15.5763	12.21
					9.155	25.635		0.802375	4.86618							9.155	7.935		1.64015	14.0845
					16.479	12.512		8.16327	2.33155							11.902	8.24		4.57247	12.5945
					10.681	7.019		50.7614	15.528							9.46	8.85		2.96824	25.4453
					13.123	7.935		1.88182	1.52742							8.24	7.324		6.61376	1.9658
					28.076	18.921		15.625	3.92927							8.85	12.512		5.76369	11.7371
					7.935	13.123		1.78508	4.0568							9.766	8.545		1.52114	0.970026
					8.545	7.324		7.49064	34.6021							22.888	7.935		2.62881	2.64971
					7.629	7.019		38.7597	69.9301							8.24	13.428		1.98098	7.70416
					11.597	10.986		16.9492	3.1407							47.913	14.648		4.65983	1.33209
					12.817	8.24		5.39957	19.5695							10.071	33.264		6.73401	4.39367
					10.681	9.766		4.73709	1.38351							11.292	7.629		33.3333	6.09385
					8.545	13.123		17.6991	16.1812							7.324	7.629		3.60881	0.548155
					13.733	9.46		1.05988	8.70322							12.817	9.155		1.81884	5.54939
					7.629	10.071		3.82848	2.98063							33.875	9.46		21.692	14.881
					9.766	11.597		0.253075	7.48503							8.545	10.071		2.90951	17.8571
					10.681	13.733		2.0028	5.80046							50.964	23.804		3.80952	4.66853
					7.019	10.376		12.5313	2.70709							8.24	18.005		2.46792	4.85201
					10.071	12.512		1.00664	2.48633							8.24	26.245		11.0865	1.22594
					9.46	15.869		8.1103	21.4592							7.324	10.681		2.57334	44.2478
					16.174	16.785		3.61011	5.21648							10.681	10.986		0.688137	2.29621
					11.292	32.959		43.8596	14.0252							8.545	8.24		7.36377	23.8095
					11.292	7.019		10.7411	0.875427							9.155	7.019		0.813008	3.09502
					7.629	11.292		3.87447	11.8064							11.902	7.324		51.2821	5.56174
					8.24	14.038		7.38007	3.20616							7.019	8.85		15.3374	1.83688
					34.485	9.766		3.68596	18.3486							14.343	14.343		1.76835	2.17344
					18.005	39.673		0.942063	1.64258							19.531	9.46		3.74532	20.9205
					22.583	12.512		0.464102	11.1982							10.681	9.155		2.31857	4.05351
					15.564	8.85		14.6843	44.843							30.823	11.597		4.10846	2.78009
					8.85	10.071		24.0964	7.93651							11.902	11.597		3.4626	12.0482
					14.648	11.597		10.9051	25.974							9.46	20.142		21.5517	4.22476
					8.85	7.629		1.41583	57.1429							7.629	13.123		3.78644	4.99002
					14.648	20.752		2.37756	17.762							14.648	17.395		12.8866	40.6504
					9.46	8.24		6.47668	7.99361							20.447	13.428		2.36295	38.0228
					31.738	9.155		1.53539	4.66418							8.545	10.681		3.57526	1.19076
					8.24	8.85		5.26593	1.43041							9.155	9.155		1.94666	3.6914
					14.648	7.629		0.337041	17.3611							12.512	17.7		4.46628	2.79955
					11.902	18.005		4.28082	3.58423							14.954	8.545		2.61917	12.8041
					8.85	9.155		9.3633	4.88759							7.019	17.09		2.63019	5.23286
					7.629	8.24		2.03957	35.5872							55.847	13.428		28.169	26.5252
					9.766	9.46		8.10373	15.674							22.278	16.785		2.30256	61.3497
					8.24	8.545		4.18585	2.91036							25.635	12.512		9.23361	1.36705
					11.902	7.324		1.19589	6.92521							8.24	9.46		1.43781	25.8398
					15.259	16.479		51.5464	20.8333							7.324	7.629		5.40249	4.46828
					14.343	8.85		16.6389	7.35835							9.155	19.531		2.7533	2.3015
					16.785	13.733		32.4675	26.9542							10.071	20.447		2.30256	12.3305
					16.174	13.428		18.5185	19.685							8.24	11.597		6.60502	7.4184
					14.954	9.155		4.59348	10.8225							9.766	21.362		7.4239	109.89
					7.935	18.921		6.28536	2.61233							11.292	11.597		0.904814	15.674
					8.85	10.071		6.56168	2.58264							7.324	7.324		11.3766	3.86548
					19.226	24.414		1.72176	1.09409							11.902	7.935		10.5485	1.87652
					7.629	7.019		8.8574	3.00933							34.79	39.063		3.81388	32.2581
					7.019	14.954		12.7714	9.92063							9.766	7.629		6.28141	18.622
					8.545	21.973		6.3012	4.0833							11.902	14.038		3.44828	11.976
					11.292	20.447		1.4828	21.5983							8.85	15.564		23.8663	7.50751
					47.302	9.46		1.39587	8.23045							8.24	11.292		5.56174	0.685495
					19.226	13.428		9.03342	26.5252							7.629	16.479		3.53232	21.5054
					19.836	8.545		2.73	7.77001							15.259	10.681		16.4474	5.18672
					39.673	11.597		5.8548	46.2963							10.986	9.766		7.48503	1.46177
					11.292	9.155		10.7066	35.8423							7.935	14.038		18.4162	5.42888
					11.597	7.324		1.37874	22.6244							10.071	7.019		0.842176	55.5556
					16.174	14.648		0.904077	2.76396							21.667	8.24		2.15843	5.03525
					9.155	7.935		1.29016	4.5106							10.681	21.057		0.846597	1.04756
					10.071	11.597		0.800384	20.1613							8.545	13.123		2.36967	10.3093
					15.259	10.376		0.405992	31.8471							10.986	7.935		1.40135	106.383
					11.292	8.545		0.309138	27.1739							7.324	8.85		9.52381	98.0392
					8.545	7.935		30.9598	11.0742							10.376	8.24		8.7108	9.06618
					9.46	7.019		3.84172	5.67859							30.212	8.545		5.04541	3.63108
					31.738	7.935		25	4.9505							23.499	21.057		22.6757	8.51789
					8.24	27.466		5.10986	4.82625							8.85	10.071		0.592522	4.34028
					8.24	17.09		16.5017	8.4674							9.766	8.545		6.37755	1.56006
					12.207	19.226		7.08717	15.5521							29.602	24.109		11.5875	40.9836
					17.09	7.324		126.582	1.38122							8.85	12.207		10.9769	3.32116
					13.733	26.855		34.1297	2.64061							13.428	10.681		7.06215	2.34467
					10.376	11.902		0.9993	84.0336							7.324	27.466		56.4972	2.17297
					11.902	21.973		1.28551	21.0084							11.292	7.629		5.80046	18.2815
					13.428	7.935		4.68823	10.4167							9.766	17.395		3.03767	2.55167
					11.902	16.174		11.6822	1.68805							12.817	11.292		1.57953	5.02513
					8.85	13.733		3.97298	16.2866							15.564	7.019		10.5374	10.2987
					8.24	8.85		0.41927	1.74551							9.155	47.302		2.3663	2.97265
					18.005	10.071		2.69179	3.93856							7.324	11.597		3.65497	3.16056
					9.46	10.986		20.6612	25.7732							15.869	10.986		4.31779	0.374462
					12.207	31.433		4.91884	20.8768							13.123	8.24		17.2712	2.21976
					10.071	14.648		13.6426	3.861							8.24	23.193		93.4579	6.75676
					10.071	9.46		24.4499	34.8432							14.343	12.512		8.53971	11.2486
					17.7	7.019		8.62069	3.61272							14.343	8.24		4.94315	0.905059
					9.766	7.019		1.78603	1.83318							7.324	15.259		5.0025	28.5714
					23.499	8.545		4.158	5.9312							15.259	15.259		16.4204	0.530532
					10.681	7.935		3.75235	2.40038							9.155	61.035		32.2581	3.09598
					20.447	11.292		2.05592	1.92604							13.733	8.85		10.6157	5.31915
					7.019	8.24		1.14482	3.50631							10.986	12.207		5.86854	1.61499
					11.292	8.545		2.26398	1.66528							46.387	11.292		8.05153	4.69263
					28.381	44.25		1.87161	11.3895							7.935	11.597		2.26091	9.4697
					9.155	7.935		4.0783	25.7069							18.616	19.531		3.22165	8.33333
					7.935	12.512		2.75786	39.2157							34.485	17.09		4.69263	7.6864
					15.869	24.109		4.05515	7.05716							21.973	14.343		1.93424	5.17598
					14.648	10.376		1.43699	5.10986							9.155	8.24		0.750863	22.9885
					19.226	18.005		2.47586	10.6724							8.24	13.428		15.528	3.52858
					9.155	7.324		16.5289	13.986							11.292	10.681		10.3842	12.9199
					7.324	18.005		14.4092	8.17661							7.019	9.155		5.9312	111.111
					9.46	11.292		12.3457	9.3633							7.935	8.545		0.716435	7.17875
					10.986	8.545		22.9885	36.2319							10.376	7.324		2.83126	32.4675
					9.766	35.095		0.466287	4.75285							16.174	10.071		2.52972	7.70416
					11.902	7.935		3.61141	40.9836							7.629	7.019		5.58659	2.4325
					13.428	14.038		11.274	1.5223							7.019	15.564		57.1429	1.47384
					7.019	10.071		15.8479	3.35121							11.292	7.629		0.844167	1.23625
					8.24	7.019		50	23.31							7.935	17.395		1.82782	23.2019
					7.324	7.019		2.49813	12.2249							14.038	10.681		6.28536	2.38493
					32.349	12.817		7.62777	30.4878							9.766	7.629		99.0099	5.24934
					9.155	8.85		17.6056	11.5473							12.512	11.902		17.3611	11.5473
					35.4	10.376		1.48346	4.27168							15.259	12.512		4.9554	5.71429
					7.019	19.836		2.68025	23.9808							54.321	8.545		4.33276	1.62866
					11.292	13.428		24.57	117.647							26.55	18.005		45.8716	2.71297
					7.324	8.85		14.556	52.0833							14.343	8.545		101.01	44.2478
					11.597	18.005		3.20307	2.89771							10.681	10.681		11.9617	4.85673
					16.785	8.24		2.88517	78.7402							9.155	9.46		5.76701	12.87
					7.324	13.733		3.65764	20.202							13.733	9.155		5.68505	0.978282
					15.869	8.24		3.79651	11.9332							17.395	13.733		2.92312	7.14286
					16.174	8.545		69.9301	4.79157							14.648	10.681		3.87147	34.8432
					11.597	13.733		56.8182	2.86862							11.597	7.019		3.63108	5.01505
					9.155	15.259		4.36872	30.03							8.24	18.005		5.52486	7.89266
					56.763	14.038		10.4058	32.1543							8.24	12.512		10.142	8.76424
					12.817	8.85		2.37869	3.76932							8.85	12.817		4.58716	20.7469
					7.324	12.512		3.66166	3.6075							7.324	18.005		3.15358	1.91424
					16.174	10.681		3.11915	12.837							18.005	15.564		4.08831	10.2564
					15.564	9.155		0.694541	1.17578							10.681	17.09		9.84252	41.1523
					9.766	10.986		0.671727	15.1515							14.343	10.986		11.0254	6.21504
					8.24	7.629		49.7512	30.9598							11.292	11.597		15.5521	2.23414
					8.85	11.597		8.8574	0.512007							9.46	11.597		4.98256	8.84173
					14.343	9.155		7.61615	6.82128							15.564	10.376		10.8578	4.92611
					10.681	14.648		17.0358	1.0812							11.292	14.343		2.0517	3.32668
					8.545	59.509		1.09902	3.53732							33.264	33.875		6.45161	3.63636
					13.428	10.071		20.8768	1.97511							14.038	7.019		5.11247	68.9655
					9.46	10.376		9.95025	62.5							12.207	16.479		1.36687	3.56506
					7.019	17.395		3.2113	11.236							10.681	11.597		7.19424	8.56164
					10.681	8.24		4.85673	2.84576							20.447	11.597		1.51676	1.0175
					8.85	19.531		1.40825	5.44366							16.174	7.324		3.31785	26.6667
					14.954	8.545		7.12251	5.95593							14.038	10.986		1.83184	13.0208
					9.766	20.752		1.8093	6.71592							8.545	12.512		9.32836	9.05797
					18.311	43.335		1.04156	2.40038							45.166	10.986		23.8095	15.6006
					21.057	11.597		21.2766	15.361							9.766	9.766		0.932662	6.19579
					20.142	7.629		5.77367	26.8817							19.531	7.324		56.4972	2.53165
					7.019	11.597		73.5294	74.6269							11.902	10.986		2.94291	8.32639
					7.935	12.817		97.0874	5.91366							8.24	11.292		17.9856	1.42755
					12.207	18.311		17.1233	5.35619							7.019	14.343		15.1057	2.69107
					19.836	21.667		9.3985	63.2911							8.545	7.629		5.38213	66.6667
					11.902	9.46		38.7597	2.98686							10.376	8.545		5.81395	3.92619
					25.94	13.733		6.78887	2.11909							17.7	13.733		3.47464	1.6284
					12.512	17.09		6.77048	4.57875							14.343	13.428		9.0009	1.79308
					7.019	9.766		0.55894	5.15996							11.292	8.545		2.6738	1.96889
					11.902	17.09		23.9234	13.8122							7.324	9.155		1.99124	3.83142
					18.921	11.902		16.0772	1.47601							8.85	8.24		8.11688	4.05351
					10.071	7.629		0.633473	20.6186							8.85	17.7		1.59541	37.3134
					10.986	10.986		18.7617	4.28633							8.24	8.24		1.10583	49.0196
					9.46	7.629		12.9032	26.178							10.681	16.785		14.6199	2.67881
					7.019	11.902		22.6244	7.55858							14.648	14.343		0.739973	22.7273
					8.24	11.902		3.01932	5.33903							8.24	7.019		7.84314	3.62056
					7.019	8.545		5.33333	7.82473							8.85	7.324		5.58347	4.8852
					9.155	7.629		3.1837	50.2513							10.376	11.902		4.06009	7.22543
					35.706	27.161		2.0284	2.52717							36.316	10.071		64.9351	4.12541
					7.629	28.992		11.0619	4.33088							8.545	16.174		31.0559	4.16146
					29.907	14.954		1.22699	1.08826							11.902	9.155		65.7895	4.2735
					10.376	9.155		3.63901	24.8139							12.207	22.278		2.88767	6.93963
					7.019	9.46		13.0039	2.05212							8.24	17.7		30.03	3.06373
					8.24	10.376		7.38007	3.02939							8.85	31.433		3.29707	45.4545
					7.019	12.512		5.31067	0.681989							9.766	8.85		9.19963	5.68182
					30.518	7.629		33.8983	3.60881							7.019	7.629		3.24992	34.2466
					7.629	7.019		37.1747	2.63852							10.681	17.7		16.5017	1.82983
					7.019	8.85		13.0548	8.26446							9.766	10.986		1.91975	2.96033
					12.817	8.24		1.48368	9.82318							13.428	12.512		17.3913	2.11999
					8.24	15.259		7.31529	19.4553							11.292	17.395		1.60436	13.6612
					7.019	7.019		14.0449	35.461							10.681	25.024		1.11769	2.53421
					22.888	9.46		3.05623	1.60179							17.09	10.986		12.5945	7.59301
					7.324	21.362		8.64304	2.61165							16.174	10.986		1.07898	4.49843
					11.597	8.545		11.1235	1.44991							10.376	8.545		5.70451	2.75634
					10.986	48.218		15.528	1.77336							11.597	7.019		5.7971	7.55858
					19.226	37.231		4.86855	9.5057							9.766	7.019		2.03998	4.00481
					7.629	10.986		15.873	52.9101							9.766	12.817		8.45309	0.810701
					19.836	11.292		14.8148	0.551572							12.817	21.057		0.463564	13.9276
					15.869	8.85		23.8095	31.4465							28.381	10.071		32.5733	5.68828
					11.902	9.46		8.78735	2.99581							10.071	10.376		1.84128	68.9655
					10.071	10.376		5.6243	0.891981							12.817	7.019		3.92773	1.23381
					22.278	15.564		15.7233	14.9477							26.55	7.629		0.963206	10.4493
					10.376	21.973		35.8423	12.4069							7.629	20.752		12.3609	4.33276
					20.752	14.038		7.11744	4.88998							8.545	12.512		5.50358	8.74126
					8.24	11.597		15.1515	1.09063							10.681	21.667		53.1915	8.3612
					11.292	9.766		0.889442	7.45156							10.986	12.512		1.8498	12.5
					18.005	15.564		10.0908	5.9453							12.512	8.85		3.18066	2.80348
					9.766	9.155		27.027	5.0025							8.24	10.376		1.3468	5.55247
					11.292	7.935		1.4573	7.07214							23.499	19.836		43.4783	3.76506
					9.46	10.681		2.56674	4.71698							7.935	7.935		14.2857	3.55492
					8.545	12.817		1.95886	30.1205							7.019	7.935		5.18135	3.25098
					9.766	7.324		96.1538	20.0803							26.55	7.629		16.7224	3.59066
					18.005	15.564		7.12758	16.2602							12.512	11.292		11.1235	9.06618
					7.935	14.343		5.33618	2.32666							26.55	15.869		27.248	77.5194
					20.142	12.512		9.13242	15.456							9.155	7.324		11.4286	1.30668
					15.259	20.447		1.51814	11.7786							9.46	20.142		6.30915	0.491014
					16.174	9.766		59.8802	15.6006							15.869	7.629		1.81818	0.775314
					7.935	13.733		1.10509	1.83251							9.766	10.071		4.43459	10.4932
					7.019	13.123		19.4553	2.9129							8.85	16.785		39.5257	2.34302
					18.311	12.207		2.52398	2.4728							9.46	8.545		1.02176	5.57103
					13.428	8.24		6.65779	3.885							10.376	18.616		9.37207	13.0378
					11.902	8.545		3.25098	2.34467							8.545	7.935		0.318776	1.81225
					17.395	7.019		1.95046	24.57							7.019	13.733		38.4615	1.47776
					10.071	27.466		1.97511	5.27983							7.019	14.038		2.86779	9.57854
					8.24	25.024		8.84956	142.857							9.46	11.292		8.37521	4.57247
					11.292	46.692		5.14139	3.72578							7.935	8.85		10.5932	11.4811
					17.09	7.324		28.7356	12.1065							18.616	9.766		5.58659	3US_REM_tdTom-
					7.629	14.954		2.09468	56.1798							10.376	8.85		24.6914	5.73394
					11.597	12.817		26.738	4.66636							14.343	16.479		1.74672	2.1777
					12.512	10.071		2.32504	3.73413							7.629	55.542		5.09165	1.21344
					11.597	8.545		18.1488	105.263							7.019	7.324		1.34789	125
					7.019	12.817		60.6061	1.56838							9.46	7.324		13.245	5.3135
					7.629	7.324		2.70709	1.81554							8.24	9.155		1.98098	60.241
					10.681	12.512		3.96825	13.4953							10.071	7.629		25.5102	2.87439
					10.681	11.597		7.49064	1.06712							8.24	10.071		5.80046	15.1057
					8.545	19.531		5.72082	8.53242							9.46	8.545		0.58126	7.76398
					7.324	17.7		17.8253	32.7869							45.776	24.109		21.2314	8.21693
					9.155	43.945		7.36377	6.16903							12.207	8.85		22.5734	3.21958
					10.681	21.667		4.29	6.36943							9.155	13.733		2.56542	2.60824
					27.161	19.836		11.919	6.74764							8.24	9.766		0.706414	7.24638
					15.564	24.414		3.34672	3.2							17.09	9.155		11.236	7.11238
					22.583	9.46		4.67727	29.6736							9.46	10.071		1.25016	3.27869
					16.785	8.545		0.951384	2.46184							11.597	15.564		5.7971	29.5858
					9.766	9.46		7.97448	11.9048							11.597	19.531		4.77555	4.62321
					7.935	10.986		1.08202	21.0084							10.986	11.292		1.94175	2.40848
					14.038	10.681		1.16713	6.15764							9.155	9.155		2.84576	13.4771
					12.207	17.395		2.11193	2.04583							15.259	7.935		54.6448	55.5556
					12.512	7.019		1.87723	133.333							19.531	10.681		4.40917	62.8931
					9.155	7.324		33.0033	16.9492							40.588	9.46		3.87297	40.3226
					9.766	10.376		6.85401	12.0482							8.85	9.155		42.735	33.7838
					8.24	9.155		144.928	18.9036							37.231	23.804		1.2832	135.135
					21.057	7.629		27.6243	2.0016							11.902	12.207		25.9067	7.59878
					9.155	9.46		13.9082	1.59693							22.278	71.106		2.52207	3.42818
					10.681	15.869		3.72578	9.31099							7.935	10.681		9.56938	20.3666
					15.564	10.376		9.68054	6.43915							7.935	20.752		13.1579	22.3214
					7.324	14.343		5.07872	0.838293							7.019	9.766		22.4719	8.80282
					11.902	8.545		1.03466	7.22543							12.817	10.681		4.54752	2.37192
					9.766	16.479		2.21729	8.09717							8.545	10.071		0.852878	1.57035
					8.85	9.766		3.50385	1.78667							19.836	8.545		10.0604	4.75059
					8.85	7.629		4.36872	10.395							8.85	9.46		5.28541	41.1523
					8.24	9.155		44.6429	4.28816							10.681	14.954		25.7732	17.094
					17.395	15.259		8.66551	64.1026							14.648	12.512		1.81984	4.89237
					10.071	11.292		13.7363	16.3132							14.038	9.155		4.69043	3.75235
					13.733	11.597		3.23834	12.4533							11.597	23.804		12.5313	66.2252
					7.324	9.766		1.49566	5.06329							10.681	11.597		3.84468	12.1359
					14.648	20.447		10.0908	22.4719							11.292	11.902		1.9604	6.27746
					7.629	19.531		2.61986	9.04159							7.935	11.597		23.2558	5.46747
					9.155	16.785		8.726	4.89716							15.869	11.902		11.0988	24.6914
					8.85	9.766		7.90514	6.01323							12.817	13.733		4.28082	7.45712
					46.387	11.292		3.67918	0.668405							7.935	17.7		105.263	3.16256
					16.785	12.512		2.18055	60.9756							20.142	7.629		28.6533	5.67537
					16.785	8.24		30.7692	1.51332							16.479	11.597		2.37643	11.3379
					20.752	13.123		16.6389	4.54339							13.733	7.019		8.14332	20.4918
					7.324	10.986		28.0899	6.10501							11.597	16.785		5.26593	1.20496
					25.024	27.771		4.96032	2.95421							10.376	14.648		2.07082	4.095
					21.667	23.804		7.77001	2.04583							8.545	14.954		1.69549	1.69924
					15.564	33.875		16.1812	8.10373							11.292	8.545		2.42131	1.81061
					7.629	20.752		2.11595	6.68449							9.766	8.24		32.0513	2.47219
					12.512	9.155		1.11445	16.8067							16.479	24.109		12.3153	5.70776
					10.986	7.324		10.3627	3.27869							7.935	7.019		6.60939	1.58453
					9.46	17.7		4.03714	6.8306							9.766	8.545		153.846	2.97619
					8.545	30.823		10.661	11.2108							9.155	8.85		1.40193	19.5695
					9.766	14.343		4.77783	8.7184							7.019	31.738		1.16822	42.9185
					7.324	7.935		5.14403	2.57069							18.616	10.376		2.49314	4.41306
					7.935	12.207		1.90404	6.47668							17.395	9.155		0.476872	2.81294
					10.376	11.292		8.09717	8.81834							7.019	7.935		0.879507	5.43774
					7.935	14.343		55.5556	10.6838							17.7	23.499		5.32198	2.64901
					30.212	14.648		7.57002	7.96813							13.123	10.986		1.31978	3.7037
					11.902	7.935		8.09717	144.928							7.935	11.292		10.3199	7.02741
					7.629	7.935		6.52316	6.48088							20.447	15.564		15.4321	1.7334
					7.324	11.902		1.92419	22.2717							35.095	11.292		3.48554	0.530786
					7.935	30.212		5.78704	2.1173							15.564	20.142		43.8596	1.92678
					15.869	10.986		43.6681	0.850123							36.926	21.973		27.5482	2.32234
					8.85	7.324		0.619924	31.5457							10.071	11.597		3.87898	7.16332
					13.428	15.564		58.1395	13.0548							14.954	8.85		8.92857	12.0919
					9.46	9.766		1.92345	21.5054							7.629	18.616		8.41043	3.96825
					7.629	46.387		1.30736	6.15764							39.063	7.324		0.764994	5.79039
					8.24	14.038		8.05153	4.01123							8.545	14.343		4.21763	5.19481
					24.719	9.155		32.4675	30.3951							13.733	12.817		7.01262	5.14403
					20.447	30.212		3.91389	55.5556							8.24	19.836		0.722126	1.42227
					12.817	12.512		6.73401	14.245							16.174	9.46		30.6748	12.6743
					11.902	8.85		6.20347	43.8596							18.921	9.46		1.49142	22.8311
					44.25	12.817		17.8253	6.19195							7.019	13.123		45.2489	5.71429
					7.019	26.55		89.2857	2.49563							11.597	18.616		15.674	2.10261
					13.428	8.545		2.50063	28.3286							11.292	7.324		10.101	32.2581
					12.817	14.954		2.89771	7.5815							7.629	27.771		2.54065	2.02388
					17.09	10.376		1.08448	0.4884							8.24	15.564		3.28407	9.6432
					13.123	11.902		5.22193	9.34579							7.019	16.785		4.54752	0.55209
					7.935	9.46		3.77929	2.40906							7.019	7.324		4.53926	3.13676
					11.292	20.447		70.4225	4.28633							9.46	11.902		28.8184	1.9279
					14.648	24.414		28.9017	2.95683							8.85	7.629		6.17665	30.303
					8.85	8.85		2.4888	2.89352							26.855	8.545		9.03342	2.25632
					7.019	8.545		11.4548	3.53732							7.019	7.935		0.542358	23.9808
					12.512	7.935		4.92368	41.1523							7.935	31.128		4.74608	6.37349
					14.038	13.428		0.957029	20.7039							18.311	31.738		1.82083	4.01606
					7.324	9.155		17.6056	6.89655							44.861	7.629		1.67701	1.844
					7.629	13.123		3.09406	9.06618							16.174	9.155		2.25378	5.41419
					11.597	15.869		17.6056	15.748							11.902	9.766		0.883392	15.456
					14.343	10.986		3.82702	23.0415							7.935	10.986		21.3675	23.3645
					8.24	7.629		0.685965	48.0769							7.019	7.629		1.91865	111.111
					7.935	7.935		8.77193	2.29305							8.85	7.324		67.5676	2.84091
					12.512	9.155		2.29621	11.8624							8.545	27.771		1.08295	5.94177
					7.324	7.324		5.16262	42.3729							10.986	8.545		1.61629	1.09951
					10.376	9.46		1.5706	11.3122							9.766	8.545		1.51791	7.22543
					10.376	13.123		20.9644	27.3224							17.7	7.935		2.63296	5.38503
					11.292	7.324		30.7692	14.8588							7.935	7.019		8.84173	9.77517
					11.597	8.545		1.62549	1.02955							16.479	9.155		4.71698	2.03376
					13.733	15.869		2.10217	161.29							7.324	7.935		15.625	6.11621
					17.09	17.7		2.52016	6.56168							18.616	8.24		31.746	12.7877
					21.057	10.376		5.7971	1.52858							10.376	11.902		33.2226	4.50653
					10.071	9.46		0.891186	8.54701							10.376	9.766		2.04625	0.351481
					15.564	17.395		10.2249	19.0114							12.817	7.324		91.7431	5.61798
					28.381	14.038		1.37268	5.95593							9.155	14.038		9.74659	2.84738
					9.155	9.155		1.73853	1.6518							8.24	12.817		12.1212	5.38213
					8.24	7.324		1.87547	20.8768							17.7	7.935		4.13394	1.8093
					7.324	14.038		13.7931	4.20521							9.155	9.155		0.473462	6.32111
					21.057	11.597		9.44287	17.1821							14.038	12.817		5.16796	7.1582
					9.766	21.973		14.7929	29.1545							12.207	9.155		1.87021	8.57633
					9.766	8.24		4.85909	11.6686							27.466	8.24		22.5225	1.22085
					12.207	12.207		10.2987	3.44828							7.324	13.123		2.82247	7.66871
					22.278	8.545		9.54198	4.50653							34.79	7.629		11.3895	5.33333
					10.681	14.343		1.5921	7.25163							8.85	18.311		3.58551	16.7504
					7.629	10.376		2.47036	17.2712							14.954	9.155		8.05802	4.82393
					11.902	13.733		11.9332	5.95238							11.902	16.174		30.6748	1.82415
					10.376	24.414		53.4759	7.54148							9.766	16.785		3.13676	7.46826
					7.019	25.024		5.64972	20.8333							15.564	7.019		21.978	4.78927
					19.226	10.986		4.49035	6.34921							14.038	10.071		13.6799	5.77367
					28.076	18.921		41.1523	6.80272							18.005	9.46		3.96825	6.71141
					13.428	15.564		26.3158	1.92901							13.428	8.24		7.61615	20.5339
					25.33	17.09		44.2478	28.6533							11.597	7.935		30.2115	3.2457
					14.343	7.019		2.32883	56.1798							8.545	12.817		4.38212	6.39795
					9.766	7.629		1.08849	21.5054							11.902	32.959		2.1395	35.7143
					11.292	11.597		7.02741	2.69687							8.85	7.935		2.59673	9.0009
					8.24	7.935		5.81058	4.49035							15.259	11.292		11.236	2.13538
					19.226	7.324		8.1103	3.43525							17.395	14.648		5.06842	5.40541
					14.038	21.973		11.8343	4.32526							15.259	10.376		7.3046	11.8483
					32.654	10.376		11.4548	44.6429							7.019	9.766		9.22509	3.35008
					9.46	7.324		6.05694	40.3226							9.46	12.512		0.80457	2.67666
					8.545	15.869		14.9477	15.4321							12.817	9.155		10.4275	11.1359
					20.142	7.324		17.1821	27.4725							9.46	7.935		1.81488	0.775615
					7.935	10.376		48.3092	20.9205							10.986	7.629		3.04785	6.9979
					7.629	20.142		13.4953	6.34115							8.545	9.766		3.17763	25.5102
					41.504	8.24		10.9769	31.348							32.654	24.109		20.9644	25.3165
					15.869	10.071		1.35446	1.91571							19.226	18.005		6.68449	41.6667
					7.019	13.733		4.17014	1.43205							21.667	17.395		6.04595	10.1626
					8.545	8.545		1.99203	5.61798							20.142	7.935		3.68324	6.91085
					20.447	22.888		9.96016	2.51256							15.259	19.531		9.7561	3.80084
					13.428	10.071		0.4537	18.6916							7.324	54.626		2.62743	6.3857
					13.733	10.376		1.19861	4.13907							14.038	10.071		14.4509	9.82318
					7.324	20.447		10.661	3.22893							26.55	36.926		2.18866	30.7692
					7.019	9.766		1.12322	1.91278							7.935	15.564		24.8756	3.10655
					9.46	16.174		6.26174	6.49773							10.986	14.038		10.3734	2.92312
					10.376	11.597		1.77431	4.24088							10.071	8.24		10.4932	4.06504
					11.597	50.964		18.9036	30.303							17.09	52.795		2.3175	14.2653
					10.376	9.46		22.0264	121.951							13.428	9.155		1.9015	2.18627
					13.428	18.921		0.974849	8.18331							11.597	7.019		19.0476	18.797
					9.46	11.597		3.40252	6.17284							22.583	12.817		6.39795	2.50125
					8.545	25.94		3.89257	5.13347							14.954	9.46		10.5263	1.13533
					8.545	9.155		17.6991	5.44959							10.071	8.545		4.52284	6.07903
					11.902	18.921		11.1111	17.452							12.817	12.512		1.0226	3.87447
					28.687	19.226		3.6075	7.5815							12.817	26.855		3.46981	23.8095
					17.7	16.174		15.3139	11.4155							7.019	10.986		26.0417	4.37063
					9.46	7.629		2.56739	5.92768							17.09	14.648		3.8506	1.92234
					14.343	8.545		99.0099	7.27273							15.869	15.259		4.16667	19.8807
					9.155	49.438		16.6113	2.49813							8.85	15.564		5.41419	1.40746
					28.992	7.324		8.09061	5.89275							9.155	10.071		6.42674	12.2549
					16.174	11.292		16.1551	9.68054							19.531	14.954		13.8504	3.51741
					10.681	11.292		2.37079	23.0415							10.986	15.564		26.0417	7.6864
					18.311	12.512		3.36587	28.2486							13.123	14.648		16.6389	1.8577
					8.24	16.479		10.5152	3.38868							9.155	15.259		14.3266	5.41126
					10.376	10.071		26.5957	17.5747							14.954	10.986		36.7647	20.5339
					11.902	7.629		1.32661	4.42674							13.123	18.311		19.084	4.65549
					17.7	17.09		11.3636	17.1233							12.207	8.545		50.5051	31.5457
					9.46	10.681		4.90918	8.01282							10.376	9.766		6.16143	0.932662
					11.292	18.005		13.089	25.641							9.46	11.597		11.6279	6.13874
					10.986	11.902		2.95508	9.65251							12.512	14.648		1.26326	4.158
					10.071	14.648		42.0168	2.9824							12.512	14.954		6.04961	3.15756
					7.019	7.935		4.90196	26.455							10.986	30.823		3.80952	46.9484
					10.071	11.292		14.1443	10.3627							21.973	10.071		3.33667	6.37755
					8.85	7.324		3.73413	29.2398							12.817	10.986		2.4266	0.485037
					13.733	17.7		0.933184	10.2564							14.038	9.766		32.2581	0.825083
					8.545	7.324		18.3486	2.74424							11.292	10.071		0.7818	3.42936
					10.376	16.479		9.00901	0.830358							10.071	8.545		16.6945	76.3359
					10.071	10.986		4.329	1.3988							8.85	15.259		126.582	10.9649
					8.545	10.681		0.329207	3.25098							7.324	17.7		3.96511	41.1523
					9.155	7.324		7.57576	4.37828							7.629	13.428		2.11238	0.471098
					8.24	11.597		28.9017	5.39374							19.531	15.259		7.74593	5.05306
					7.019	8.85		42.735	3.31565							11.902	10.986		91.7431	10.7759
					11.902	7.629		5.91716	4.69484							28.992	15.564		3.85951	15.6986
					7.629	8.85		0.683761	3.51865							9.155	7.324		0.851716	5.05051
					7.324	11.902		2.57599	1.97941							29.297	10.071		7.08717	128.205
					10.681	16.785		11.9332	22.779							7.019	11.597		8.6881	25.0627
					11.902	9.46		10.7759	75.7576							8.545	25.635		4.1684	10.929
					15.869	9.766		13.5318	3.64564							8.545	10.681		2.5208	11.7096
					17.395	29.297		6.71592	8.25083							18.005	10.681		1.85494	156.25
					18.616	11.292		5.8548	4.74158							19.226	7.629		3.47343	9.96016
					29.297	8.545		40.3226	3.16056							23.804	7.935		4.56413	2.1978
					21.057	9.155		1.80636	4.29553							7.935	10.986		6.25391	3.90778
					7.019	14.648		2.83206	10.01							15.564	16.785		94.3396	9.31099
					7.935	8.85		12.9534	1.03767							10.376	16.479		0.795039	2.1395
					39.063	8.85		20.5339	1.1147							13.428	7.019		18.3486	20.1613
					7.324	23.193		5.34188	6.96864							12.817	10.681		0.913993	8.4246
					13.123	12.512		6.04961	11.6686							11.902	8.85		3.74813	6.74309
					12.512	12.207		3.30469	50							10.986	7.629		10.989	15.5521
					17.7	9.766		16.6113	0.674855							7.324	10.071		3.18776	20.5339
					25.024	11.292		8.81057	0.704523							8.24	10.071		4.5683	11.5607
					9.46	10.986		11.4416	0.917768							14.954	8.24		3.77786	3.77644
					9.155	11.597		1.29921	1.50557							15.564	12.817		0.937559	37.4532
					12.512	7.935		1.32714	12.0627							21.362	30.518		11.4943	1.75871
					7.019	11.902		14.43	1.24023							18.311	9.766		2.90613	2.49377
					12.207	10.071		9.12409	2.54647							21.362	8.85		2.49066	1.57233
					25.635	11.902		13.6426	4.23549							7.019	7.019		9.4697	27.027
					36.011	11.902		2.81532	18.315							19.836	14.954		16.8067	4.14938
					8.545	7.324		5.93472	6.92042							9.766	8.85		2.79252	35.461
					18.005	17.395		9.10747	22.2222							8.85	33.569		11.4811	28.8184
					9.46	15.259		4.3573	69.4444							8.24	7.935		1.07124	3.89712
					12.817	7.629		57.1429	24.1546							35.4	7.019		13.624	15.528
					7.935	16.479		1.41543	2.26347							10.071	13.733		1.65618	35.461
					18.311	17.395		1.55982	128.205							9.155	8.85		3.8835	2.09336
					11.292	10.376		2.57202	1.76087							10.071	17.7		1.59821	2.30787
					11.902	10.071		1.17371	1.43369							10.071	10.986		16.5563	7.07714
					10.071	9.46		0.746436	4.97512							8.24	19.226		3.05717	7.29395
					13.428	40.283		35.9712	32.0513							36.926	15.259		4.06009	1.90949
					24.719	8.24		2.18341	0.802375							8.545	13.428		4.4405	43.4783
					7.935	41.199		27.3973	1.55933							20.142	9.766		10.9529	4.42674
					8.545	25.33		0.96965	13.1752							7.935	10.681		18.1488	0.403991
					20.752	18.616		6.69344	30.303							9.155	8.545		10.5485	2.20751
					10.376	24.109		4.15282	4.41501							35.095	19.531		9.19963	5.2521
					7.324	12.817		3.39905	3.60101							7.324	7.629		10.5152	4.0016
					11.292	9.46		10.4822	24.2718							11.292	11.902		1.83891	10.9051
					32.654	16.785		7.54148	1.67926							10.681	12.512		3.7594	41.4938
					11.597	17.09		2.16685	5.79374							10.681	14.038		4.54545	7.34754
					10.681	8.545		4.25532	2.93772							10.071	10.376		6.31313	2.85796
					9.766	15.564		3.67782	16.0256							17.09	9.766		13.459	3.7037
					9.155	8.545		42.1941	19.1939							15.869	10.681		32.6797	9.3633
					10.376	12.207		6.34518	40							9.46	12.512		8.8574	61.7284
					14.038	21.973		9.38967	2.19202							11.902	8.545		2.03169	3.81534
					18.005	13.733		19.4932	4.0016							77.82	10.376		5.34474	2.71887
					10.681	8.545		3.59454	35.2113							25.94	19.836		21.7391	3.22685
					10.986	7.324		2.89603	0.758495							8.545	8.545		1.86012	5.5991
					14.038	32.349		45.4545	26.8097							13.123	15.869		34.3643	3.03214
					20.752	19.836		27.3973	5.74713							7.935	13.123		4.66853	6.75676
					11.597	12.207		2.87026	26.178							7.324	7.629		3.78072	192.308
					7.935	10.376		2.06356	11.5075							42.419	9.155		46.729	2.9577
					11.902	8.24		2.78629	36.9004							17.09	9.155		36.63	1.25266
					14.038	7.019		7.40741	3.1746							7.935	10.986		3.07503	5.85138
					14.343	10.071		3.80228	3.81971							8.545	7.324		8.7108	3.55114
					12.817	7.935		0.924129	8.34725							8.85	13.123		0.673174	5.31915
					10.681	7.324		4.55996	1.81488							13.123	7.019		54.6448	2.89184
					8.24	7.019		6.0241	14.6843							9.46	19.531		14.1243	1.13585
					10.376	12.207		5.52181	3.07692							7.324	30.823		4.0032	12.0482
					7.935	11.597		22.779	35.7143							10.986	9.46		11.325	0.829944
					8.24	31.128		1.4988	35.461							13.733	12.817		43.8596	2.94551
					7.935	14.954		3.20616	7.14796							8.545	13.733		6.41026	39.2157
					19.531	7.629		2.59134	8.19672							10.376	12.207		5.63063	68.9655
					7.019	12.512		7.35294	28.7356							7.629	7.019		3.73274	16
					7.629	12.512		4.16667	15.2905							26.855	8.24		1.86776	1.6835
					10.376	8.85		2.14225	1.8546							8.85	11.597		2.9129	5.78369
					7.324	14.954		0.278133	7.46269							25.635	12.512		2.19394	20.0401
					7.019	9.46		43.1034	11.9617							8.545	21.667		1.92123	6.94927
					15.259	23.193		1.77085	2.54259							10.986	7.324		2.41896	6.88705
					9.766	13.428		3.94322	21.0526							9.155	7.019		3.39559	56.8182
					21.973	16.174		2.81294	1.17055							11.902	9.155		2.59673	10.2564
					15.869	11.902		1.94742	5.42299							21.362	18.005		5.40541	46.0829
					20.752	7.629		7.30994	117.647							7.324	23.804		5.65931	12.8535
					7.629	18.921		1.84706	12.2399							7.324	17.7		2.12179	12.2699
					17.09	23.804		8.70322	5.78704							7.324	9.46		3.22893	12.5471
					89.111	10.986		39.8406	3.40136							8.85	10.681		1.90549	0.897827
					10.071	25.94		6.07165	12.1951							32.959	10.376		4.18585	3.72995
					20.142	17.7		1.44196	4.66636							7.935	14.954		0.967024	3.25521
					14.648	13.123		21.0526	8.5034							22.583	14.038		4.03714	3.0553
					7.935	8.24		1.19175	10.1729							17.09	7.629		6.15764	6.32911
					8.85	8.24		13.0719	19.1939							17.395	10.071		2.25124	8.96861
					23.499	21.667		2.11416	3.17965							18.921	9.155		8.26446	4.59137
					7.324	8.545		11.4679	14.7275							15.564	8.24		5.03525	24.6914
					11.597	11.902		45.6621	3.95413							24.719	7.324		6.13121	1.40292
					12.512	29.602		8.59107	1.40687							7.935	10.376		4.10341	2.98418
					7.629	15.259		6.53168	11.7925							7.935	14.343		4.86855	36.3636
					17.7	10.071		9.09918	10.4058							8.545	7.935		8.74126	6.12745
					19.531	12.512		2.0674	5.74053							9.155	17.09		7.51315	4.87092
					10.681	14.954		1.75963	1.62338							8.24	9.766		2.3175	8.14996
					7.935	14.343		1.74429	15.2905							10.071	11.292		7.00771	1.56372
					7.324	15.259		2.85063	2.6448							10.681	9.766		11.4155	7.57576
					11.292	11.902		7.34214	1.86986							12.817	17.09		5.66572	11.1607
					9.155	10.376		0.968523	8.09061							8.545	8.85		3.465	3.92927
					8.85	7.629		3.90778	1.73913							8.545	40.894		3.19489	4.36872
					9.46	8.85		0.533504	18.1488							10.681	9.46		18.8679	7.75795
					28.076	9.155		14.1044	38.9105							7.019	7.019		2.11551	2.57732
					8.85	11.292		2.30681	57.4713							23.804	9.46		64.1026	31.6456
					9.766	12.817		7.20461	6.91085							7.019	8.545		1.6072	6.92042
					10.986	7.019		3.29381	5.95593							35.095	8.24		26.5252	9.83284
					8.85	9.46		0.955019	9.56938							10.376	8.545		5.27426	2.42014
					7.324	11.902		9.25926	17.6991							12.817	15.564		8.51064	20.6612
					7.935	14.343		0.812678	1.45794							18.616	7.629		1.02522	1.20135
					29.602	9.766		14.4092	4.84966							8.24	7.935		3.30142	0.348748
					9.766	22.583		1.87829	9.24214							19.531	7.324		1.4041	6.52316
					16.174	9.155		5.53097	7.02247							7.019	21.362		10.4384	12.1803
					9.46	7.019		6.58328	1.04362							10.376	7.935		3.35008	32.7869
					49.133	7.324		2.32829	15.2207							8.545	13.428		10.2354	33.557
					21.057	9.766		11.1111	50.7614							13.428	19.226		1.69319	7.94913
					10.071	8.24		1.7934	40.8163							15.259	20.447		9.18274	0.803084
					9.46	45.776		2.09161	12.7714							14.954	8.85		0.644247	0.622278
					7.629	22.278		70.4225	6.87758							12.207	8.85		66.2252	8.27815
					8.24	10.986		3.43407	4.2123							7.019	19.836		2.64061	8.77193
					32.349	21.362		12.4378	2.61712							13.733	8.545		26.8817	14.0845
					10.071	9.766		6.82594	15.8479							10.986	7.629		1.00969	3.39213
					8.85	31.128		90.0901	1.92753							17.09	18.311		12.6743	12.2249
					11.292	11.902		2.63296	6.98324							10.681	7.629		6.88705	59.1716
					7.324	28.992		0.397456	68.0272							15.564	10.681		16.7504	0.669478
					7.019	9.46		14.7059	56.4972							10.986	7.019		1.80897	1.55039
					7.019	24.109		25.641	4.59559							26.55	12.512		1.50308	7.47384
					18.616	8.85		2.08768	10.7875							9.766	21.362		13.1752	65.3595
					9.46	9.155		30.7692	4.0783							11.902	16.174		2.62605	1.89753
					14.343	8.545		4.55373	2.57666							8.85	12.512		5.12821	2.76014
					11.902	27.161		21.097	46.5116							7.935	10.681		9.38967	6.04595
					34.79	7.629		40.4858	8.97666							7.629	29.602		18.622	9.82318
					9.766	9.155		1.49813	4.17537							34.18	12.512		3.31016	1.15393
					10.986	19.531		2.47954	2.1777							11.597	10.071		3.68324	0.381709
					9.155	10.376		1.63908	6.71592							7.019	10.986		12.7226	9.51475
					8.85	10.071		3.99521	2.32019							7.629	7.019		1.2089	0.645703
					8.24	22.583		3.51741	7.19424							35.095	7.629		4.10509	2.63089
					13.428	14.954		53.1915	30.3951							10.681	11.597		0.557103	0.966651
					8.24	7.019		11.2486	3.00842							12.817	10.071		1.18399	17.1233
					61.035	7.629		39.0625	11.3507							15.564	15.564		39.5257	1.295
					10.681	24.109		7.26744	2.55493							10.376	10.376		23.2558	5.36481
					14.954	11.902		2.82167	15.6006							13.733	8.85		2.41196	3.28299
					8.85	16.785		20.0803	14.0647							18.005	7.324		4.54959	11.0865
					33.569	21.057		5.7971	2.28781							9.46	10.071		2.33263	4.2735
					16.479	10.681		2.26347	1.27616							7.935	8.85		6.11621	2.86451
					7.935	18.921		0.956572	26.3852							8.24	12.512		3.68868	14.4928
					8.24	9.155		0.948047	2.63922							7.019	17.7		16.4474	1.59847
					7.019	7.629		84.7458	1.02754							8.545	31.128		7.0922	2.35738
					8.545	7.935		3.36361	5.91017							10.986	9.766		2.035	9.76563
					7.629	18.616		35.8423	52.356							7.324	10.986		63.2911	16.3666
					20.447	8.545		3.42936	1.05608							14.038	10.986		84.7458	2.28415
					8.85	7.324		11.5607	6.84932							16.479	7.935		10.3734	14.1243
					10.986	10.376		11.9474	2.78707							15.259	10.986		5.82072	12.7551
					7.629	7.629		2.01045	7.43494							25.94	22.278		10.2669	2.12993
					9.46	8.24		61.3497	21.4592							9.155	9.46		25.641	5.74713
					9.46	9.766		4.095	42.1941							14.038	8.24		1.81192	1.3412
					14.038	16.174		1.24425	4.29369							15.869	23.499		5.06329	12.2549
					9.766	7.629		138.889	15.8479							9.155	7.019		2.85796	15.1745
					17.09	14.038		9.05797	31.1526							7.935	11.292		56.4972	6.54022
					16.785	12.512		1.07991	6.11621							27.161	11.597		5.84454	16.4474
					7.324	10.681		7.94281	6.62252							12.512	10.681		1.27616	1.35962
					21.667	12.512		0.341834	12.3001							7.019	12.817		111.111	4.77099
					10.986	8.85		5.76037	21.097							28.687	10.986		8.77963	3.70096
					7.324	8.545		2.16169	0.569346							8.545	10.681		4.02414	54.0541
					8.85	8.24		5.17598	20.6612							15.564	8.24		24.0385	4.07166
					7.019	7.019		6.11621	909.091							36.011	7.629		16.0256	5.42888
					8.545	18.311		4.38982	0.759244							7.629	12.207		1.73521	13.587
					8.545	34.485		6.21504	2.95247							12.512	10.376		4.64037	27.5482
					10.986	9.766		7.86164	7.99361							31.433	7.935		13.369	11.1483
					8.24	18.921		3.69413	31.5457							8.85	8.85		7.4129	31.348
					12.207	15.869		2.65604	1.41024							11.292	7.019		0.582615	3.84911
					7.019	7.019		3.71333	8.16993							21.362	10.071		14.3266	1.17509
					10.986	7.935		3.0021	7.27273							10.376	8.545		1.34391	4.09836
					9.766	15.869		5.33903	3.98089							10.071	22.583		1.52952	31.0559
					10.681	38.147		0.661157	9.4162							8.545	17.7		1.09099	2.936
					9.46	7.324		2.46548	10.1317							23.193	8.545		0.68573	13.8889
					8.24	10.681		29.4118	5.54324							20.447	16.479		74.6269	7.5643
					13.123	8.24		3.11139	16.9492							16.785	15.564		4.1806	9.27644
					8.24	9.46		7.06215	50							8.24	15.869		2.01939	2.66028
					8.24	13.428		22.6244	7.84314							21.362	8.545		10.5485	0.29816
					13.733	14.038		14.2248	43.29							12.512	7.629		6.18812	16.5563
					13.123	15.564		1.71527	23.31							8.545	7.019		14.9925	1.01926
					14.038	9.155		2.63783	11.7647							7.324	13.733		7.81861	39.6825
					22.583	9.155		42.5532	1.52022							21.973	7.019		17.9856	2.06526
					11.902	17.395		22.9885	2.66028							7.019	9.155		3.67782	24.9377
					8.545	7.629		5.55247	12.6904							8.85	10.071		4.40917	0.888968
					12.512	7.324		3.77074	1.08038							28.076	8.85		2.36911	2.71961
					7.935	10.376		1.79888	6.36537							7.935	7.019		2.65111	4.18235
					9.46	9.766		3.19387	0.944109							14.038	9.155		32.3625	7.26744
					25.33	9.766		6.30517	7.04722							7.324	8.24		178.571	39.2157
					12.817	23.193		1.36017	25.5102							9.155	8.85		3.20718	2.84981
					7.019	8.545		80.6452	5.01505							34.485	26.245		1.2282	4.13223
					8.85	13.428		38.3142	7.33676							7.324	17.7		13.0378	15.5039
					10.071	19.226		36.63	3.40252							13.428	7.019		1.35373	5.73066
					8.545	39.978		42.0168	1.10583							12.512	7.324		49.0196	2.04374
					9.766	38.147		9.31966	1.25628							7.935	8.545		0.673991	1.16252
					16.174	9.155		0.860733	26.0417							7.935	17.09		8.77963	4.02414
					18.616	10.376		13.947	2.0555							10.071	8.545		1.04844	156.25
					26.245	19.836		9.82318	12.7714							9.766	11.597		2.32072	2.67308
					7.324	10.376		1.51607	31.746							9.155	8.24		3.6049	13.624
					8.24	13.123		86.9565	5.21105							42.419	7.935		9.28505	17.3611
					7.019	8.24		4.37254	3.97298							8.85	14.954		1.83486	10.8814
					15.259	9.155		2.31965	4.03877							8.85	14.343		12.9199	1.26855
					9.46	27.161		24.6305	1.7854							17.7	13.733		4.29923	16.3666
					9.46	13.733		0.907606	8.7184							7.019	21.057		1.97006	2.31857
					21.362	20.142		10.4384	3.71471							9.155	8.545		6.60066	6.23441
					14.648	10.071		10.5374	44.843							54.932	24.719		1.47449	9.84252
					10.376	11.292		1.26502	2.56674							13.733	20.752		5.69801	8.07103
					7.019	16.479		1.07342	11.8765							10.071	8.85		5.73394	1.83117
					22.583	17.395		1.92604	29.2398							14.648	9.155		4.62963	5.0226
					7.019	17.7		3.465	16.1551							10.986	8.24		4.07	5.76701
					14.954	13.733		1.60282	21.3675							10.681	37.842		1.16768	6.0024
					7.935	19.531		2.1645	11.5741							17.09	7.935		8.75657	4.56204
					19.531	8.545		1.51768	47.619							7.019	7.019		28.0112	8.82613
					10.986	10.376		3.82117	10.2145							8.545	20.752		31.0559	8.53971
					8.85	10.681		2.54001	13.2979							7.324	7.629		2.98151	12.6422
					7.324	17.09		9.71817	2.82008							10.376	8.545		8.07103	3.75516
					20.447	20.752		6.48508	9.3985							18.311	9.46		2.62536	3.87447
					37.842	11.902		2.16497	17.3913							8.85	14.038		41.1523	1.87336
					8.545	16.479		1.45054	5.57103							12.207	10.071		2.24366	21.7865
					7.629	14.954		3.65631	3.58166							7.629	8.24		2.96384	16.5017
					12.817	10.071		0.436243	5.30504							10.376	17.7		0.755002	53.1915
					10.681	11.292		0.0746157	4.22833							13.123	25.33		6.80272	10.6157
					7.935	15.564		1.44991	35.3357							10.681	13.123		10.2775	23.9808
					9.155	10.681		1.98886	0.754489							40.283	8.545		15.2439	12.3305
					13.428	25.33		4.09668	12.5628							7.324	7.324		4.32152	5.78035
					9.155	15.259		9.68992	15.6495							9.766	7.629		2.07383	5.38793
					8.24	18.921		39.2157	1.21743							28.381	15.564		3.55745	38.4615
					14.343	10.376		18.0505	24.0964							13.123	12.207		8.32639	4.06504
					10.071	23.804		47.619	49.7512							9.766	24.414		2.96033	11.8483
					7.935	8.85		4.78011	5.26316							14.954	11.902		2.92398	60.6061
					12.207	20.447		2.08725	3.56761							26.245	7.019		1.77904	0.806387
					10.986	11.292		2.14684	3.9984							12.207	14.343		6.36943	36.9004
					9.766	45.776		2.00602	1.99362							10.376	20.142		7.54717	3.76081
					47.607	19.226		4.04367	3.82263							34.18	7.019		7.50751	5.73394
					30.823	26.855		1.49388	8.78735							8.85	9.46		3.51741	12.8205
					8.85	8.85		2.85551	11.5207							19.226	19.531		7.76398	8.96057
					7.629	25.024		0.951203	12.3305							20.447	8.24		1.28353	6.40615
					8.85	18.005		6.41849	2.27118							9.155	18.616		4.995	12.9534
					28.076	14.038		2.55037	17.1233							7.629	7.935		44.843	3.10078
					10.681	9.46		3.37724	2.06058							20.142	7.935		0.593472	7.49064
					22.888	13.733		19.4932	65.3595							10.986	43.335		1.94477	19.4553
					39.063	7.629		4.64468	4.24628							9.46	7.629		14.6413	1.77904
					15.564	7.324		4.39174	8.94454							8.545	10.986		196.078	10.9529
					7.935	13.733		0.927042	4.48029							12.207	15.259		6.80272	3.12598
					12.512	17.09		5.01505	2.89184							8.24	12.207		18.7266	4.2735
					8.85	12.207		84.0336	21.978							18.311	28.381		4.77783	56.8182
					31.128	10.376		3.4118	2.51953							7.629	10.681		1.04976	4.96524
					9.155	7.019		30.303	21.5054							11.597	16.479		8.24402	0.799488
					31.128	8.545		94.3396	40.4858							8.24	8.85		40.3226	10.627
					23.499	7.324		2.24517	6.96379							9.155	18.311		2.77316	8
					8.545	10.681		44.843	3.14861							10.071	9.46		3.86548	1.5569
					8.85	7.019		13.624	5.78035							17.09	15.869		22.9358	40.1606
					12.207	21.362		6.94927	1US_REM_tdTom-							7.935	7.935		4.10172	73.5294
					12.207	10.986		14.0845	3.30579							8.545	9.766		15.1057	5.60538
					15.259	8.85		11.3122	2.92997							7.935	8.24		1.45054	8.69565
					11.597	15.259		3.27976	7.01262							10.071	7.629		5.43183	10.3842
					18.005	12.817		3.36134	4.79616							9.46	8.24		2.49252	2.53036
					20.447	7.019		3.08928	6.45578							10.376	15.869		8.48176	13.587
					7.629	10.986		2.56674	2.76014							12.817	22.583		5.9312	5.57724
					10.376	16.785		0.692761	6.28536							13.733	7.629		4.11015	58.4795
					19.836	13.123		8.02568	24.8139							11.292	17.7		4.19463	2.457
					15.564	18.616		2.6462	6.78426							11.902	10.986		6.50195	2.90698
					7.019	30.518		0.929541	5.71429							8.545	18.921		2.65675	2.22717
					14.954	36.621		1.12334	16.4204							13.123	36.011		3.90778	1.02891
					12.207	42.114		7.98722	40.6504							7.019	9.766		9.25926	22.1239
					10.681	9.766		11.236	10.1626							23.804	19.531		2.5355	1.85357
					8.85	10.681		1.42898	2.07987							11.597	10.681		3.75235	1.5015
					9.155	8.545		50.5051	12.5945							9.766	17.09		9.35454	1.90694
					7.935	56.763		8.31255	34.7222							9.766	14.954		9.93049	5.90667
					15.259	16.174		3.55619	2.42189							13.733	18.921		4.3592	24.8139
					8.85	10.071		3.77216	10.6157							9.766	8.24		4.12541	5.15198
					32.349	16.785		0.399441	1.69176							10.681	8.24		11.1857	11.6414
					20.752	19.836		21.5517	18.9394							18.616	12.817		3.13185	7.01754
					7.019	8.24		7.94281	9.82318							54.932	8.85		3.40483	4.88998
					7.935	7.935		5.0226	9.06618							9.766	14.954		0.989609	1.11396
					9.766	12.817		5.5991	2.55363							18.005	14.648		13.624	232.558
					10.376	10.376		4.49843	2.0903							7.935	10.071		4.79157	3.76081
					11.597	39.368		11.8343	4.92854							7.324	18.921		153.846	2.08507
					30.212	7.935		7.3692	3.79363							7.629	8.24		3.45423	10.8932
					8.545	15.869		93.4579	5.94884							8.545	8.85		5.27148	37.3134
					7.324	23.804		39.3701	5.15198							10.071	12.512		21.322	69.9301
					7.935	16.785		5.06073	26.2467							7.629	8.85		18.8679	112.36
					7.629	7.019		1.19218	3.03951							17.09	10.681		2.39063	3.34225
					9.46	14.648		1.23426	8.84956							8.85	7.935		4.0783	11.4416
					12.817	7.935		1.67701	10.7991							9.766	9.766		7.54148	1.27146
					18.616	8.85		0.591821	8.34028							17.09	15.564		4.13052	2.69614
					14.648	8.85		2.23364	5.60538							9.766	32.349		1.4997	9.19118
					12.817	17.09		4.91642	6.97837							9.46	9.155		9.79432	6.28931
					8.545	13.428		1.1966	10.2145							14.648	11.597		2.3753	8.62813
					16.174	14.648		1.08601	5.88928							10.681	7.324		5.40249	4.95295
					15.259	55.542		1.48765	6.66223							26.55	17.09		6.83995	15.456
					11.597	7.935		1.6952	16.1551							13.123	10.376		23.8095	27.6243
					7.629	10.071		1.55255	14.6413							7.324	10.376		30.303	1.35648
					7.935	9.766		1.93648	5.54324							9.766	8.24		2.02716	0.980777
					13.733	7.935		2.49938	4.81696							7.935	11.597		1.88005	10.395
					12.817	10.986		0.537317	3.97298							10.071	9.155		4.19287	2.09468
					8.24	10.376		3.19285	4.75737							13.733	9.46		5.51268	18.4843
					10.681	10.376		4.51671	3.36927							9.766	17.395		9.5057	38.0228
					14.343	36.316		22.2717	3.20307							9.155	22.278		9.95025	27.8552
					13.733	7.019		18.6916	3.87447							14.954	21.057		11.1111	3.66435
					15.869	15.869		3.70096	4.13223							8.85	12.512		0.739754	1.58554
					10.681	21.362		8.23723	31.6456							13.428	15.869		2.19394	16.5563
					7.629	9.155		2.34028	3.51							13.428	18.005		2.24165	2.25073
					9.766	9.766		3.75799	13.8122							14.038	9.155		13.7741	12.1212
					10.986	25.33		6.70241	0.745768							8.85	9.46		47.8469	4.92611
					7.629	17.395		4.158	7.29927							7.324	11.292		39.8406	4.77783
					14.343	8.85		1.01771	2.69542							14.038	10.986		6.05694	5.91017
					12.207	14.343		4.92126	11.3636							19.531	7.019		2.43784	14.9477
					8.545	7.019		2.15193	36.1011							7.629	30.212		1.88822	4.25713
					10.681	16.785		3.85951	4.72144							8.24	40.894		2.63227	1.40213
					13.428	9.155		6.30517	2.34522							10.376	9.46		4.76872	14.6413
					10.071	16.174		8.17661	12.1065							24.719	13.123		1.00331	3.82555
					17.09	18.311		4.16667	1.98965							15.869	7.324		2.1925	3.43289
					12.512	9.46		6.89655	21.5983							19.226	12.207		40.1606	1.51883
					9.155	10.071		4.29923	23.0947							11.902	9.46		1.67168	6.62252
					13.733	11.902		7.58725	54.3478							10.071	10.071		4.67727	11.8765
					9.766	8.545		3.0175	4.10846							7.935	7.019		1.93723	0.493778
					8.545	10.681		1.88644	7.07214							14.038	9.766		5.60538	2.6824
					14.648	14.343		0.816793	4.58505							7.019	12.817		5.24109	3.25945
					12.817	16.785		2.46366	2.94811							20.752	7.324		7.00771	12.3916
					7.629	10.681		9.68992	2.41604							12.512	7.935		22.0751	4.08831
					9.766	7.629		3.09885	4.74383							12.817	9.46		3.83877	192.308
					7.324	10.376		4.51875	9.42507							10.071	7.629		4.66418	9.8912
					25.94	14.343		0.528989	2.25276							31.738	7.324		13.0039	4.70367
					8.24	8.545		48.5437	16.835							8.545	12.207		67.1141	0.795735
					13.428	10.376		3.86548	2.55363							9.766	11.292		23.3645	1.37874
					16.479	8.545		3.62188	3.33444							9.46	7.324		20.1207	3.861
					25.33	25.635		14.3472	20.2429							7.019	11.292		1.45243	4.48029
					9.46	10.376		1.21699	1.47536							7.019	13.123		8.15661	1.21788
					12.512	13.733		0.856825	9.40734							9.766	13.123		1.35722	31.1526
					11.597	22.888		4.77555	2.79877							9.46	13.428		4.7619	6.87758
					9.155	7.324		2.0404	0.657678							11.902	19.226		9.84252	15.7978
					31.128	7.019		0.3335	4.55373							8.24	17.7		1.35007	33.3333
					20.142	12.817		3.99202	0.842602							10.376	7.324		7.79423	16.1812
					10.071	7.019		14.8368	34.6021							7.935	7.019		3.5137	75.188
					7.019	24.414		1.12892	8.74126							7.019	9.766		14.8588	15.0376
					9.766	9.766		1.08026	4.8852							9.46	40.894		1.27372	26.455
					10.376	11.292		1.48478	4.64253							9.155	8.85		3.07787	3.58295
					8.85	24.414		8.84956	17.5439							8.85	7.019		26.738	3.44828
					10.986	11.597		24.9377	4.71698							15.869	7.629		15.7978	0.310829
					9.766	9.155		7.44048	14.556							9.46	7.629		4.40141	3.18269
					8.24	9.46		17.2414	7.12251							8.85	14.038		7.97448	35.9712
					12.817	14.954		2.34357	3.19183							12.817	9.155		5.07357	35.2113
					24.109	11.597		2.63227	2.01694							11.292	10.986		18.2482	1.96773
					8.545	15.564		1.64447	15.1286							10.376	7.935		5.78704	14.3885
					11.597	8.85		7.86164	1.05988							7.019	29.297		4.22654	1.26759
					32.349	13.123		3.28947	21.7391							12.512	17.7		3.57782	0.322456
					8.24	19.836		5.42005	0.908678							8.85	16.785		1.68776	19.1205
					8.85	9.155		101.01	3.74251							7.019	8.24		5.84454	2.84252
					11.597	9.766		8.15661	3.03398							11.902	10.071		37.4532	22.9885
					8.85	8.24		9.27644	11.3636							21.057	7.935		1.9253	15.6986
					8.85	8.85		9.25069	15.2439							10.376	14.038		3.96354	2.76014
					32.959	9.46		60.6061	11.3122							8.24	24.414		1.5058	2.02922
					17.395	16.785		4.84027	1.45921							10.071	24.719		15.625	1.65755
					8.545	8.85		9.3985	51.8135							11.902	10.071		44.2478	3.41997
					7.019	9.766		4.03388	4.50857							9.46	28.992		22.5734	34.1297
					9.155	9.766		1.67532	13.6426							8.85	9.46		3.74111	40.4858
					7.935	7.019		147.059	2.58398							10.986	8.545		1.80278	65.7895
					9.155	9.766		2.66596	7.38007							7.629	10.376		4.4287	2.37982
					8.24	13.733		1.30327	23.2558							7.019	15.259		13.587	10.4712
					14.038	14.343		4.42087	5.91366							11.597	19.836		18.797	8.21018
					16.479	9.155		3.02206	12.3457							15.564	8.85		32.2581	2.53614
					7.324	11.902		3.06185	32.6797							17.7	10.376		42.5532	0.636618
					11.902	28.076		11.1607	19.6464							14.343	8.24		23.753	8.06452
					10.681	8.545		4.7619	7.84314							14.954	14.954		19.9601	2.26244
					15.564	16.479		11.655	1.15393							32.043	11.597		3.2144	4.81232
					12.817	8.24		2.92056	1.86916							20.447	7.019		9.0009	7.63942
					12.817	7.324		0.844309	1.01937							7.629	16.479		2.95072	31.4465
					9.155	7.629		5.23834	12.1065							24.414	22.583		10.3627	1.68067
					18.005	7.324		0.440063	6.9541							9.46	19.531		5.19481	2.41488
					8.85	7.629		5.82411	30.1205							11.597	12.817		0.859771	0.952835
					23.499	7.019		5.67537	0.293341							9.155	17.7		12.9534	4.30663
					8.85	21.362		5.56174	3.56379							7.935	11.292		6.20347	7.86164
					24.109	14.343		1.0591	5.92066							25.33	34.485		8.30565	1.88573
					10.376	43.945		25.641	18.7617							7.019	28.687		2.40442	4.89237
					19.226	23.193		3.93701	7.05716							9.46	24.109		12.6103	42.735
					10.986	7.324		10.582	16.5289							8.85	7.019		1.04362	70.4225
					10.681	15.869		5.28821	11.6822							8.24	7.019		2.37812	1.58053
					24.109	8.545		19.084	153.846							12.207	41.504		8.05802	5.0813
					9.46	15.564		2.40558	1.91168							9.766	29.907		1.92678	2.36295
					8.24	10.376		2.74348	3.0931							11.292	8.545		2.84819	12.8205
					10.071	18.005		1.28337	8.74126							25.635	7.935		10.0705	6.04961
					9.766	11.902		8.67303	28.0112							7.935	9.155		17.094	11.7786
					7.324	15.869		153.846	19.305							14.038	14.954		1.26855	3.50018
					20.752	28.992		46.9484	5.90667							7.019	9.155		6.20732	4.38982
					10.681	9.46		21.1864	103.093							11.597	8.24		20.6612	0.571951
					8.24	7.019		39.5257	5.01253							19.531	17.09		3.30907	3.1407
					16.479	12.512		34.965	2.55167							66.834	9.155		3.89408	1.09926
					10.376	16.479		54.9451	22.779							22.278	9.155		13.7363	102.041
					10.986	8.24		20.4499	6.85871							18.921	9.155		2.92483	1.82349
					9.766	8.24		27.6243	3.71195							7.019	7.324		1.66556	9.58773
					11.597	23.804		4.04858	8.01282							22.888	13.733		0.870928	1.56691
					9.766	18.616		0.820816	6.86342							18.311	21.667		14.2248	11.7096
					10.986	7.019		4.80307	2.10305							13.733	18.921		7.92393	5.2521
					31.738	20.752		0.988533	2.40964							9.46	7.629		1.11074	9.30233
					11.292	8.24		2.18723	3.19591							7.019	18.005		5.41712	16
					22.278	19.531		1.94326	30.581							13.428	25.635		2.28938	5.91716
					7.324	12.207		0.497859	7.93651							15.564	7.629		8.90472	7.95545
					9.46	7.324		46.729	4.86145							11.292	8.545		26.5957	6.3012
					10.376	16.479		18.9036	42.0168							15.259	22.583		0.888494	8.31947
					13.428	12.512		4.75285	23.31							7.019	8.24		4.98504	0.804699
					14.648	21.667		10.582	22.8311							22.278	23.499		27.5482	2.66951
					11.902	23.499		3.83877	8.3612							10.681	7.019		21.9298	2.48447
					10.681	23.499		2.27946	1.99084							35.706	13.123		17.9856	6.28931
					13.733	21.973		14.8368	17.9211							12.817	7.935		6.94444	1.09673
					10.376	17.09		12.4378	6.93001							7.629	11.597		2.70783	3.125
					18.311	7.019		3.92773	53.7634							17.395	8.545		7.09723	4.08998
					7.019	12.207		2.60213	16.129							12.512	9.46		4.73709	7.95545
					10.376	12.512		2.24165	5.50358							8.85	11.597		20.3666	0.504592
					8.24	16.174		17.2414	1.70882							17.09	8.85		3.90778	1.97161
					11.902	8.85		13.245	3.47947							7.629	20.142		2.9163	80
					7.019	12.512		2.13904	9.04159							8.545	9.46		12.6263	14.8588
					10.376	12.817		5.01002	17.7936							19.531	11.902		9.30233	4.76872
					9.766	8.545		4.12882	4.77555							32.654	13.733		2.53872	45.045
					7.324	7.324		7.51315	9.60615							7.935	16.174		6.15764	7.61035
					9.46	15.259		18.622	13.2626							14.343	8.85		47.8469	3.94633
					7.324	15.259		5.07872	2.48571							9.766	13.733		4.79846	6.51466
					7.019	10.681		2.13265	2.05423							16.174	9.46		20.6186	3.83877
					11.902	10.071		19.1939	3.91236							7.629	9.766		2.46063	1.57035
					8.85	59.814		9.9108	4.59559							22.888	14.648		1.17261	40.9836
					7.019	25.024		3.31455	6.08643							9.155	7.019		0.369795	4.03551
					9.46	7.324		3.77786	6.4433							9.155	21.362		10.5152	15.674
					8.85	18.005		8.31255	3.21337							17.7	12.817		5.35619	3.2113
					12.207	22.278		2.74725	3.44353							9.766	14.038		1.44907	57.4713
					8.24	16.479		3.08071	1.23001							9.155	8.24		30.1205	6.6313
					7.935	8.85		4.95786	6.66223							10.071	14.038		12.5	9.85222
					7.324	8.545		44.0529	8.46024							11.902	10.681		10.582	8.67303
					13.123	14.038		7.35294	2.05255							11.902	10.071		1.71262	17.7936
					8.85	27.161		1.87899	16.1551							28.992	14.648		13.8696	2.38379
					18.616	14.954		3.29272	11.8624							13.733	7.629		2.37248	71.4286
					8.85	17.395		11.919	21.2766							7.324	11.597		2.15424	4.59137
					7.935	11.902		7.30994	3.3557							9.155	8.85		4.86145	4.09333
					49.133	8.24		4.79157	2.51067							13.733	8.545		2.46124	1.66445
					11.902	10.071		15.8983	1.22414							10.681	8.24		1.9755	12.8205
					8.24	19.226		5.25486	41.6667							12.512	10.376		0.818867	17.7936
					7.629	13.428		31.0559	40							7.324	23.499		2.50689	9.7371
					7.935	18.311		2.59538	47.619							18.005	15.564		14.9701	55.5556
					7.324	26.55		3.71195	2.69614							29.297	11.902		2.82885	1.60308
					13.123	7.324		17.0068	4.05844							7.629	15.564		3.98883	4.43656
					8.545	9.766		1.41383	2.84657							8.24	7.019		1.19674	1.63185
					9.155	14.038		3.12402	4.20168							8.24	10.376		3.11042	9.87167
					13.733	9.46		10.8814	2.37079							14.648	12.512		18.797	4.58295
					10.986	7.935		3.65764	13.6612							31.738	13.733		96.1538	6.40615
					15.869	8.545		5.63698	2.11685							17.09	9.155		3.4626	2.42542
					8.545	8.24		35.8423	5.27983							9.46	8.85		6.74309	2.22916
					17.395	7.324		8.07103	32.4675							13.428	10.376		1.00412	6.44745
					8.24	9.155		47.3934	5.36481							7.629	10.376		34.3643	2.71223
					17.09	7.629		3.85505	5.78704							8.545	16.174		1.16387	34.7222
					11.597	15.564		7.45712	4.55581							11.902	18.616		9.71817	6.3857
					8.545	18.616		2.86533	13.8696							16.174	7.935		3.83583	7.66871
					14.954	10.376		17.5439	3.16957							8.85	25.635		2.50313	6.67557
					13.123	8.545		1.66778	4.71032							21.057	8.545		15.4799	4.8216
					39.063	10.986		16.7224	1.03939							16.479	16.785		5.23834	1.92419
					7.629	8.24		0.59988	6.64011							32.654	8.85		3.03122	4.66418
					38.757	8.545		2.26347	16.1031							8.85	7.629		1.56055	1.10193
					14.038	10.376		16.6389	11.6959							21.057	13.123		6.02773	2.43546
					25.024	18.311		4.55373	2.21092							29.602	13.733		4.30108	4.4843
					25.024	9.46		14.9254	7.73994							17.7	7.935		5.39084	9.32836
					11.597	15.869		4.43656	5.86854							15.869	9.766		5.03018	8.2713
					14.954	9.155		11.6144	8.6881							20.752	31.128		2.10571	11.2233
					7.019	11.597		16.5837	7.77001							9.766	13.733		2.32558	3.75375
					11.597	10.071		8.98473	3.08452							14.343	7.324		6.40205	16.4745
					13.428	14.343		2.29568	23.8095							12.817	9.766		2.50878	6.14628
					14.343	7.324		22.2222	12.3001							11.597	12.207		5.35332	3.83436
					10.681	8.24		10.7643	6.48508							10.986	15.259		8.34028	5.18403
					13.733	16.479		9.68054	1.67588							18.921	11.902		3.99521	9.38086
					35.706	8.24		1.15915	2.87274							8.24	36.011		1.35556	2.02388
					13.123	42.725		15.1745	6.51466							11.292	31.433		1.89753	45.4545
					7.629	12.817		14.9477	10.4603							7.324	23.193		12.987	7.18391
					9.766	8.545		0.958405	9.62464							9.155	18.921		1.1854	16.7785
					17.09	7.019		8.16993	5.42299							9.155	17.7		4.28449	14.6628
					14.648	7.629		10.4712	11.5875							16.174	10.376		40.6504	25.1256
					7.019	11.597		14.7275	21.8341							8.24	7.629		1.28816	30.581
					18.616	10.071		1.6714	35.3357							35.095	10.071		7.57576	19.1571
					10.986	7.935		20.4082	7.72798							13.123	11.292		2.38949	13.7552
					8.85	9.46		4.3573	18.2815							7.629	36.316		42.0168	19.1205
					9.766	10.681		0.532141	3.69822							12.817	18.921		5.7971	5.51268
					10.986	14.038		2.37473	13.8889							10.071	15.564		9.69932	1.47254
					36.621	10.681		2.27687	0.612557							25.024	19.531		2.44918	8.15661
					8.85	10.986		11.0132	2.9129							19.836	10.986		3.90168	12.6103
					12.207	22.278		0.486476	20.6186							10.376	10.376		1.65317	11.1483
					10.376	9.46		1.77462	5.0813							15.564	7.324		1.81094	6.15764
					7.019	16.174		1.88679	3.04414							7.935	16.174		7.95545	2.63158
					9.46	13.733		18.6916	2.34852							14.954	11.292		12.0192	0.609607
					8.24	28.992		1.1073	16.4204							12.817	9.46		4.38212	2.42307
					9.46	14.343		2.63852	6.60502							19.226	10.986		6.25391	10.7296
					10.986	44.861		55.2486	26.738							9.46	10.681		2.62398	11.3895
					18.616	12.512		3US_REM_tdTom-	12.1065							12.207	7.629		36.3636	31.9489
					8.545	8.24		17.8571	3.32005							10.376	18.311		18.8679	44.843
					10.376	12.207		2.63992	6.48508							9.46	27.771		1.24054	21.2766
					7.935	21.057		3.55999	25							9.766	11.597		5.13084	40.3226
					8.85	7.324		2.08203	6.46831							13.428	8.85		7.98085	11.9332
					10.376	9.46		5.27983	3.30142							12.512	7.935		15.2905	121.951
					12.817	17.395		2.10926	24.0964							9.155	15.869		3.8432	10.6496
					7.324	21.667		9.1659	45.2489							9.155	11.292		123.457	3.19081
					14.648	54.932		9.58773	0.493778							14.343	11.292		13.8313	3.48432
					14.343	8.24		140.845	12.3457							13.123	32.654		3.11429	3.43289
					9.155	7.324		4.4405	9.4518							7.019	13.123		2.98063	1.63747
					21.362	7.935		7.6864	4.64037							7.019	8.85		35.461	1.31822
					35.095	9.46		33.1126	7.20461							10.071	15.564		3.20718	2.56805
					12.512	8.85		37.1747	34.8432							7.324	10.681		2.22074	1.97044
					21.667	9.46		47.8469	9.2081							9.155	15.259		2.87604	38.0228
					9.766	20.142		3.54988	5.03778							8.545	14.343		17.9211	109.89
					7.324	7.935		13.1752	28.0112							7.935	12.207		3.15657	1.91131
					12.512	7.629		4.03551	2.57798							7.019	7.629		10.3093	11.8624
					11.902	9.155		4.11523	0.853461							10.986	8.545		2.8777	120.482
					7.935	35.4		3.83142	7.98722							14.648	10.986		0.827267	15.083
					7.629	11.292		1.39101	5.32198							15.564	45.166		37.3134	56.1798
					8.85	19.836		1.06394	10.7991							7.629	8.24		12.6904	4.38789
					7.935	9.46		27.933	123.457							14.038	9.155		4.1806	7.24638
					11.597	14.954		4.44247	9.04977							11.292	7.935		1.34517	10.8932
					10.071	23.804		0.990393	1.63079							10.986	18.005		2.09864	7.5643
					8.545	8.85		1.39782	15.4799							9.766	15.869		1.56128	126.582
					10.071	11.597		2.29253	1.29534							9.766	17.7		13.4953	3.63504
					7.324	8.545		1.88111	63.2911							25.33	15.869		3.39443	1.53304
					7.935	12.512		4.59559	0.861549							15.259	10.681		4.06174	43.4783
					7.324	16.785		1.78317	8.34028							7.629	19.836		3.6062	4.34594
					9.766	13.123		2.35516	15.3139							7.019	13.733		0.827198	5.14403
					19.531	7.935		1.85322	1.32223							18.616	51.88		1.7191	8.13008
					11.597	13.733		19.5313	0.849762							8.24	14.648		0.721501	6.31313
					16.785	18.005		1.20919	52.0833							7.629	12.207		1.08861	17.7936
					8.24	21.362		2.84252	13.3333							9.46	23.193		5.35906	0.777847
					7.629	29.297		1.39353	3.98248							9.46	8.24		20.1207	7.29395
					14.648	39.978		3.28839	3.03122							22.278	7.019		49.505	5.57724
					10.376	8.85		64.1026	120.482							12.512	14.648		6.04961	8.34028
					10.376	15.259		10.9769	7.84929							8.24	7.324		1.7298	37.594
					17.395	11.902		14.9477	3.80807							15.564	16.479		3.31236	6.27746
					8.24	24.414		5.22739	2.44858							14.038	7.935		6.88231	6.58762
					8.24	14.954		3.50631	17.7936							10.376	11.902		9.7561	123.457
					21.667	9.46		7.86164	35.0877							24.414	8.545		5.97015	1.29333
					28.687	12.512		2.15843	2.43665							10.681	20.752		1.35685	113.636
					7.935	9.766		10.6724	12.3457							18.616	13.123		3.66166	3.89408
					8.85	10.071		2.87191	16.8634							43.335	22.583		6.42261	24.3902
					28.381	19.531		7.6746	3.14268							11.597	31.433		1.43699	25.7069
					10.376	10.681		23.8663	2.6434							8.85	9.155		1.97668	8.19001
					12.207	7.019		25.5754	1.02522							14.343	12.817		40.1606	2.1363
					7.324	14.954		5.59284	9.23361							10.986	9.155		2.27842	26.455
					9.155	8.24		11.9904	2.22618							7.629	26.55		22.1729	3.45781
					15.259	33.264		1.13507	4.05515							16.479	11.902		4.27168	1.59464
					10.986	13.733		1.02764	30.1205							14.954	7.935		60.6061	5.54324
					15.869	11.902		5.04541	4.65549							9.155	15.869		10.2987	3.98883
					7.324	7.324		5.71429	7.11744							11.902	10.376		6.25782	2.44141
					10.376	10.376		15.8228	13.947							7.019	10.376		1.90006	3.24149
					20.752	10.986		3.34896	6.10128							7.935	8.24		20.4082	1.47754
					8.85	16.479		3.30797	7.44048							9.155	43.64		3.5524	14.1844
					8.545	7.629		6.80735	3.30797							12.207	15.259		20	2.3218
					12.817	7.019		7.63942	3.66703							11.292	8.24		1.48677	1.0226
					7.935	16.479		4.40917	5.43183							9.46	9.46		4.68823	4.17537
					7.019	26.55		8.76424	43.4783							10.376	23.193		8.96861	41.4938
					39.368	26.855		9.52381	2.27066							8.545	10.986		5.66893	11.4416
					7.935	8.24		3.28947	0.924044							36.011	14.343		3.59842	11.8064
					8.85	21.362		21.0526	42.3729							17.09	15.564		28.3286	4.97512
					7.629	17.7		2.10704	4.10846							9.766	8.24		140.845	3.48554
					13.733	8.545		8.02568	9.03342							19.836	11.292		16.2338	4.26439
					7.629	10.681		0.769053	1.5425							12.817	7.324		0.502336	13.8122
					7.324	8.85		15.361	35.0877							14.038	19.226		5.03271	185.185
					10.986	7.019		11.3895	17.6056							7.324	7.629		0.522166	30.581
					9.766	18.616		1.75747	3.91696							7.324	22.583		13.8696	5.55247
					9.766	10.071		4.29553	1.00371							7.019	7.019		41.6667	5.57724
					7.019	42.725		2.41429	1.23854							15.869	13.428		54.6448	6.34921
					19.531	27.771		12.8535	6.17284							8.85	7.019		2.0284	1.14929
					15.869	19.226		12.1655	6.91563							18.311	7.324		6.68003	1.35575
					10.681	20.752		12.1951	32.5733							7.324	23.499		1.27356	3.10366
					24.719	9.46		10.3199	23.8095							12.207	11.597		3.14961	4.61681
					10.376	26.855		3.16356	4.81232							19.531	18.616		4.23549	1.78763
					7.324	19.836		4.5106	4.158							14.648	7.629		2.81373	0.980008
					11.902	8.545		7.75795	7.98722							12.512	8.545		1.82648	24.0964
					9.155	14.648		2.33699	204.082							15.869	7.324		2.61028	2.19443
					13.428	30.823		9.21659	11.4416							8.545	8.545		11.6959	1.61865
					10.681	35.095		17.5131	9.7371							13.123	18.616		8.84173	0.391558
					11.292	12.512		5.71755	21.097							9.46	9.766		5.12295	10.1317
					7.629	9.155		3.427	3.54736							12.817	20.752		2.99222	5.16796
					11.597	14.038		6.62691	7.04722							7.019	7.935		1.13302	2.4777
					8.24	29.602		1.13623	4.54752							10.986	10.071		7.74593	1.46327
					18.921	16.174		14.6199	34.7222							10.681	8.545		1.00969	11.8064
					8.545	15.564		1.97589	3.28839							33.569	8.85		4.4287	1.91388
					9.766	21.362		3.80662	11.5875							11.597	10.071		2.48756	2.6001
					7.935	11.902		2.15054	17.452							10.071	9.46		1.63185	5.93472
					7.935	7.324		19.8807	2.08551							12.817	20.447		4.33463	41.841
					10.376	7.629		7.55858	3.16456							8.24	10.986		16.5289	56.1798
					7.935	36.621		11.1111	50.2513							8.85	9.766		5.54939	4.80307
					23.499	7.629		1.42106	8.51789							16.174	9.46		25.1256	5.28821
					10.376	29.602		2.36855	14.8148							22.888	9.766		1.26279	5.07614
					12.512	7.019		17.8571	55.8659							7.324	7.019		10.9649	13.9276
					8.545	12.512		1.26791	5.27426							9.155	10.681		2.50878	2.27324
					11.292	10.986		9.40734	3.85802							9.155	7.019		1.80213	15.1057
					7.629	7.935		8.77193	10.3306							14.954	16.174		5.01002	10.7181
					9.46	10.376		0.327504	4.84496							7.324	7.629		2.81849	3.45185
					25.024	14.954		2.10349	3.72162							20.447	9.46		4.26985	24.3309
					11.292	7.324		5.2521	3.29056							8.545	38.452		16.9205	6.41437
					7.019	41.199		2.53036	17.6678							9.155	12.817		1.33869	27.7778
					8.24	7.324		0.385208	1.91681							28.381	20.447		3.53607	3.32668
					7.324	14.343		77.5194	1.66003							8.85	9.766		3.88048	1.16333
					7.629	18.921		3.01568	2.6738							7.019	18.616		25.5754	1.81752
					18.311	9.46		12.2699	13.1062							10.986	9.766		2.76167	6.43501
					11.292	23.499		4.0783	6.90608							8.545	7.935		7.22022	5.78704
					14.343	7.935		5.6243	11.8906							7.935	7.324		2.10659	7.40741
					8.545	15.259		2.89939	8.27815							10.376	9.155		1.72147	4.27533
					9.155	9.46		2.33481	28.0899							8.545	8.85		39.0625	5.83431
					7.324	11.292		4.31406	8.285							10.986	8.545		3.45066	5.9952
					10.376	18.616		5.22193	4.06835							10.681	9.766		1.42755	6.01685
					7.935	11.902		1.67336	5.64016							14.648	11.597		5.86166	8.56898
					10.681	15.259		1.2364	10.0503							11.597	19.531		1.41403	14.0647
					8.545	33.569		2.95946	37.037							8.85	32.043		5.74713	3.56252
					14.038	9.46		2.7933	1.55763							9.46	9.155		20.5761	131.579
					27.771	16.174		6.15764	34.1297							18.005	7.324		1.24642	1.75316
					10.986	11.902		84.7458	2.08943							12.512	30.518		0.712454	5.35332
					12.817	14.343		30.1205	5.5991							22.583	9.766		15.0376	5.32198
					10.376	9.46		4.74608	4.02091							8.24	8.24		5.44662	1.40371
					10.681	12.512		7.18907	57.1429							13.733	14.954		17.4825	5.18672
					9.46	47.607		11.8765	3.94477							8.85	7.935		0.905387	5.48246
					9.766	18.616		16.9779	11.2108							10.986	18.311		21.5983	1.04134
					11.597	17.395		8.98473	3.42583							11.597	8.85		1.28205	13.5501
					10.681	12.512		2.43546	2.54972							14.343	20.752		3.47947	9.24214
					10.986	14.038		3.52361	46.2963							16.785	12.207		0.989413	11.6009
					7.935	13.428		36.2319	1.3678							36.926	10.681		3.07787	6.13874
					12.817	9.46		1.66667	13.0039							7.935	7.935		1.52648	4.82625
					13.428	9.766		0.955201	12.3457							7.019	9.766		1.41523	3.90625
					7.019	8.24		1.66889	1.49678							19.226	12.207		37.1747	7.83699
					14.954	10.071		11.0375	6.65336							10.071	19.836		0.708366	11.4548
					14.648	20.752		2.1106	3.59842							12.512	12.817		12.2249	8.56164
					9.46	10.071		5.72738	37.037							10.376	11.902		22.2222	3.24149
					8.85	45.471		1.68322	12.1803							13.123	11.597		2.38095	6.28536
					19.836	8.545		23.4192	11.4811							13.428	17.395		52.0833	0.915332
					20.752	10.071		3.0722	12.2549							10.986	17.7		2.38493	3.64299
					11.597	10.071		4.34216	9.46074							38.147	19.226		5.52181	13.1406
					25.635	8.24		1.27796	2.85388							8.545	22.888		4.45831	27.8552
					10.986	7.629		1.29099	43.8596							10.681	9.155		35.461	4.73485
					10.681	9.46		2.4432	13.7552							43.03	20.142		21.2314	3.13873
					11.597	10.071		1.23993	3.51124							16.479	7.629		8.76424	1.03799
					8.545	26.245		2.71739	21.8818							16.785	9.46		2.75862	2.52653
					66.834	14.343		1.45159	4.26803							8.24	26.245		23.4742	2.34577
					10.071	10.681		3.367	45.4545							14.648	9.46		0.878117	2.42954
					8.545	12.817		1.07078	1.38007							31.433	15.869		0.939585	3.41763
					9.46	25.33		10.6724	3.29707							10.071	14.038		1.75963	15.0602
					8.545	9.155		9.04977	13.4048							8.24	7.019		9.98004	19.4553
					7.935	7.324		1.14745	2.44798							11.292	7.324		5.87544	12.3609
					8.85	16.479		1.30514	14.3472							10.376	24.109		125	4.3535
					7.324	10.376		0.5567	52.0833							7.629	13.428		9.2081	0.171842
					14.343	16.785		5.03525	4.74834							15.259	8.24		15.674	1.40154
					7.935	14.038		22.1239	6.84463							8.85	12.512		4.62321	3.98883
					28.992	9.155		12.1951	1.24875							11.292	9.766		53.1915	2.54388
					10.071	15.564		4.5208	10.7991							10.986	8.85		2.25632	0.956114
					7.935	22.888		44.2478	8.57633							8.24	13.123		29.2398	24.6914
					11.597	7.324		15.2207	6.69344							13.123	10.376		26.178	2.98151
					9.155	12.207		12.2249	7.50188							9.766	10.071		4.3573	3.56761
					8.24	8.545		13.1926	52.6316							12.207	11.597		5.82751	2.33754
					8.545	14.954		1.60514	24.8139							12.207	9.155		15.6495	13.0548
					15.259	7.324		27.1739	42.9185							16.174	7.935		3.26797	20.4499
					24.719	17.395		14.9254	5.21648							10.986	11.292		1.29132	17.762
					7.629	10.986		14.4509	3.94166							8.24	8.24		1.59591	16.6113
					25.33	17.7		0.578269	1.07805							13.123	8.85		6.3012	4.60405
					10.071	10.681		6.32111	4.2735							18.616	7.019		5.07099	10.4167
					8.24	11.902		8.74891	1.38485							16.785	9.46		3.82117	35.5872
					30.518	10.986		2.71813	2.34632							8.24	29.297		10.4493	5.87889
					7.935	10.376		0.433388	35.0877							19.531	7.019		11.9332	53.4759
					13.123	13.123		7.20461	67.5676							8.24	14.648		8.53971	1.26358
					18.311	7.019		15.5039	32.5733							18.005	9.46		35.5872	12.0919
					7.629	20.142		13.7363	8.80282							7.019	44.25		33.0033	1.67476
					10.681	8.24		6.55738	2.47893							7.019	23.499		1.46499	7.8064
					19.531	7.019		7.83699	41.4938							7.629	9.46		1.68492	10.6383
					7.019	12.207		1.49009	86.9565							13.733	9.766		24.8139	1.17357
					18.921	7.019		1.00786	5.45256							22.583	7.629		4.52694	2.21043
					7.935	11.902		1.17675	3.15756							7.324	21.362		74.0741	3.13185
					8.85	7.629		1.287	7.33138							9.46	11.292		1.44907	58.8235
					11.902	8.24		6.10501	12.3762							12.207	7.629		2.86287	3.18471
					14.954	7.935		2.16029	1.07262							15.564	9.46		1.92345	49.505
					9.46	8.85		2.34192	16.3132							7.324	8.85		4.45831	3.97298
					9.766	13.428		19.4175	87.7193							7.935	16.174		31.0559	3.77074
					13.123	8.545		19.5695	3.48311							9.766	10.376		66.2252	42.9185
					17.395	17.09		6.5189	25.1889							25.635	8.85		7.13776	15.2439
					8.85	31.128		2.20946	51.5464							11.292	15.869		4.4484	18.9394
					8.85	8.85		12.1507	2.97796							13.123	7.019		10.8108	7.07214
					15.564	7.629		0.879662	51.8135							9.155	12.512		3.77074	7.88644
					13.428	13.733		2.73598	23.3645							7.324	10.071		1.12816	4.41501
					7.019	19.226		15.8983	6.78887							25.94	18.921		4.61255	3.23415
					7.629	10.681		2.32558	6.57462							9.46	14.954		0.647459	7.5643
					16.785	15.869		3.85654	48.5437							10.986	7.019		12.7551	5.36193
					31.433	8.24		4.29	31.1526							9.766	9.155		7.28332	1.69262
					16.785	56.152		5.35619	31.746							10.376	11.902		3.49284	4.39174
					9.155	16.174		22.5734	3.40599							12.817	13.733		7.23066	1.49209
					38.147	13.428		20.202	5.79374							9.155	17.09		232.558	16.9205
					16.174	22.583		10.8342	3.44116							21.057	12.512		4.33463	2.40096
					19.836	10.986		9.66184	0.986388							43.64	7.019		3.09981	1.48148
					10.681	7.629		7.39645	7.03235							18.616	22.583		4.26985	9.19118
					7.935	12.207		8.2713	8.41043							8.85	7.019		2.20994	1.32223
					49.744	7.935		33.7838	10.3306							12.817	9.155		1.68634	16.8919
					9.46	19.226		3.4459	79.3651							7.935	12.512		26.178	3.31126
					13.733	27.466		2.71297	4.46429							14.648	21.057		63.6943	14.5985
					8.85	7.935		6.18047	1.9755							9.766	9.766		8.00641	25.1256
					18.311	7.324		0.817327	5.42005							7.629	10.071		2.2242	2.09556
					7.019	13.428		1.36556	25.3807							10.376	25.024		3.57526	2.43902
					7.935	7.324		5.40833	2.19732							16.174	18.921		2.50438	1.06803
					25.024	7.629		0.572246	2.12359							19.836	7.935		117.647	23.6967
					10.376	10.986		4.914	10.1317							8.24	11.292		6.87758	10.8932
					11.597	8.545		1.8622	3.05717							22.583	12.207		16.0256	15.2439
					7.629	11.292		2.01329	14.7059							7.629	7.629		1.81719	5.4615
					35.706	7.324		10.3413	6.40205							7.019	13.733		9.3985	3.3389
					11.902	11.292		6.18047	1.4861							9.766	24.719		4.67508	49.7512
					14.038	12.207		21.3675	9.47867							7.324	9.155		1.57282	7.34754
					7.324	17.395		6.13874	1.5949							7.324	7.019		1.27698	36.2319
					15.259	7.324		0.734484	1.48743							7.935	10.071		10.4058	6.69792
					11.292	12.207		1.57555	3.11333							14.648	13.123		4.89476	5.63063
					7.629	9.766		19.8413	2.81849							39.063	24.414		14.245	3.4626
					10.376	7.629		6.20347	1.74611							11.292	7.935		4.13907	16.8067
					9.766	16.785		2.16076	5.57103							10.681	12.207		7.23066	4.10846
					7.019	10.071		1.05186	1.47754							14.038	8.545		5.45554	3.79651
					16.785	14.648		6.08273	25.5102							9.46	7.019		8.14996	9.49668
					9.766	43.945		5.2687	1.77242							16.479	21.973		2.48942	13.8122
					7.324	8.85		28.7356	4.56204							9.46	12.512		20.5761	7.12251
					17.09	9.766		2.09118	54.9451							17.09	7.324		13.8889	5.20291
					12.207	12.207		27.7778	5.73394							14.954	9.766		18.6916	1.21359
					12.512	15.564		1.70794	13.8122							25.635	13.733		1.80115	21.5517
					10.681	9.155		15.2207	5.14403							34.79	16.785		12.7065	6.52316
					7.935	8.85		7.16332	14.4509							10.376	17.395		1.63934	6.71592
					34.79	13.123		0.759763	3.10174							13.428	18.921		2.2899	1.49544
					29.602	8.24		8.7184	5.59284							7.935	8.545		3.68189	6.41437
					12.207	11.597		65.3595	0.657289							11.292	8.545		1.29316	9.19963
					10.681	16.785		21.2766	30.6748							12.817	27.161		5.50661	22.2717
					8.24	13.733		11.1483	4.25713							9.766	14.343		5.79039	2.03666
					9.46	8.85		10.6952	4.37254							7.019	10.376		16.8067	4.29553
					8.24	27.466		38.9105	4.02901							10.681	31.433		18.9036	14.9701
					8.24	8.545		38.0228	2.25175							12.207	10.071		3.37838	6.73854
					14.343	43.335		2.69542	2.32504							8.545	28.076		6.60502	0.665115
					7.629	11.597		58.8235	18.2149							20.752	22.888		22.9885	2.83046
					12.512	12.207		15.5521	32.0513							11.292	23.804		1.10011	5.56174
					15.564	20.447		15.3139	3.76223							24.414	7.324		6.20732	2.96912
					18.616	17.7		2.44499	7.35294							9.46	8.24		3.25733	25.5102
					15.259	15.564		1.20904	7.10732							7.629	25.94		2.40848	4.91642
					12.207	9.46		6.52742	61.3497							13.123	14.648		4.33463	7.6864
					19.836	12.207		0.512742	10.7991							10.986	9.155		16.9205	0.859107
					8.85	9.155		19.6464	2.95858							14.038	7.629		2.62674	3.8835
					7.324	10.681		6.72495	5.24659							40.588	7.324		6.49351	1.71762
					16.479	8.24		16.129	36.9004							70.496	9.46		6.1237	2.97089
					8.545	11.902		42.9185	27.1003							7.324	11.597		13.3156	2.62329
					18.311	8.24		11.4548	4.33463							8.24	13.123		4.81	9.79432
					14.038	10.376		1.64636	11.9332							7.629	7.019		4.54545	1.04047
					7.019	16.174		5.82411	11.8906							11.597	8.24		9.4162	10.6496
					7.935	7.019		22.7273	2.93341							28.687	10.376		4.14594	15.3139
					7.629	11.597		0.739645	6.41849							13.428	14.648		1.03093	3.31455
					13.733	13.123		49.7512	2.08681							7.935	15.869		1.10509	6.48508
					7.629	21.362		5.47645	2.69614							7.629	22.583		46.729	14.5773
					10.986	16.174		5.26593	21.7391							10.376	11.597		2.28519	5.78369
					8.24	8.545		3.39098	3.93856							10.376	8.545		59.5238	18.4502
					10.681	24.109		12.837	19.8413							7.324	21.973		4.12882	13.7931
					10.071	8.85		2.81215	8.87311							12.512	14.954		4.93583	1.80832
					7.935	17.7		8.95255	6.12745							15.259	7.629		6.43501	4.26803
					19.226	9.155		5.88928	35.3357							11.597	13.123		1.35465	25.8398
					9.766	9.155		33.8983	3.26477							9.155	10.986		17.0358	3.29489
					7.935	9.766		69.9301	3.84172							9.46	7.935		0.967961	8.51789
					7.935	7.629		1.34825	6.07903							12.207	48.218		9.7371	2.63644
					13.428	25.33		2.09644	7.94281							8.24	37.842		1.64231	14.0056
					7.629	8.24		0.556328	1.81028							28.381	9.766		11.9048	21.9298
					9.46	16.785		20.5761	7.01754							84.534	8.85		1.80799	0.971817
					8.85	11.597		5.46448	6.12745							7.935	8.545		0.802182	1.51172
					7.629	9.46		3.52485	6.64452							26.245	13.733		7.40741	0.853752
					23.804	14.038		6.66667	2.23364							7.935	12.512		6.5703	46.2963
					7.935	10.071		34.7222	10.9409							21.057	7.935		3.28084	1.52486
					13.733	16.785		13.5135	27.4725							30.212	13.428		11.1607	25.1889
					23.804	7.935		3.61011	25.1256							14.038	11.902		0.624493	1.95427
					13.428	10.376		3.0021	9.25926							7.324	8.24		0.47152	0.959325
					15.869	10.681		1.12347	2.89855							10.986	7.935		175.439	4.45633
					7.019	9.46		6.0024	2.6441							8.545	10.681		1.17897	2.20264
					9.46	40.588		9.26784	4.00962							28.381	10.986		6.11621	10.989
					17.395	14.343		1.5015	5.16796							9.46	11.597		30.4878	23.4742
					8.545	7.935		5.01505	5.89275							8.24	17.7		3.98406	38.3142
					10.986	9.766		75.7576	243.902							9.155	21.362		6.21118	13.1579
					11.597	10.376		0.820546	9.69932							13.123	22.888		2.86779	41.4938
					8.24	10.681		5.89971	7.06714							7.019	14.648		9.69932	24.9377
					7.019	8.24		6.54022	79.3651							9.766	12.207		3.75799	9.48767
					7.629	14.038		3.55872	4.06835							13.733	11.597		1.30668	29.1545
					32.959	10.681		4.07166	5.85138							10.071	18.311		8.07754	20.1613
					13.123	7.629		2.6448	0.907606							9.46	9.155		1.50898	7.30994
					14.038	11.292		7.33138	12.3916							36.621	21.362		13.0039	4.47027
					7.629	12.207		8.12348	4.15282							8.24	45.776		4.81	23.2558
					7.935	10.376		0.529829	0.859402							13.733	18.921		6.48929	8.41043
					8.24	7.324		1.29166	3.1506							11.597	20.142		1.87161	1.42857
					11.597	29.297		4.17711	1.62232							10.071	9.46		2.49314	2.98151
					7.629	8.545		6.48929	0.743273							13.733	11.597		3.91543	68.0272
					8.545	15.259		10.2249	6.66667							13.123	7.324		4.59348	22.0751
					10.376	28.687		48.0769	2.49938							9.766	7.019		2.05719	76.3359
					18.311	13.428		9.83284	109.89							8.545	13.428		15.1976	32.4675
					8.545	23.193		7.59878	3.30579							9.46	10.986		1.52509	0.504872
					10.071	13.123		8.3682	7.26744							7.935	8.24		2.89352	9.68992
					13.733	10.681		2.21337	5.97372							11.292	14.648		3.80518	9.09091
					11.902	38.452		10.4603	2.50188							13.733	7.935		3.68732	3.663
					7.935	9.766		0.810701	2.11372							17.09	17.09		24.9377	8.48176
					12.512	7.629		4.57666	5.9312							10.986	9.46		24.6914	13.7174
					7.935	29.907		0.588062	17.5439							21.057	7.629		44.4444	58.8235
					37.537	26.855		1.83554	2.43724							10.071	7.935		114.943	3.65764
					37.537	10.681		5.71102	9.93049							33.875	7.629		6.8306	2.21533
					7.629	14.343		3.07787	0.512426							8.85	18.616		1.1325	1.35208
					7.629	47.607		1.89251	23.3645							17.395	11.292		1.75747	6.65779
					7.324	22.278		10.661	3.59712							10.071	7.324		14.3678	3.77644
					15.259	13.123		55.2486	208.333							7.019	18.005		2.73224	1.68719
					14.648	14.343		5.49451	5.89275							19.226	7.935		3.00933	14.6628
					7.324	26.855		8.39631	7.61615							7.935	15.564		3.78215	3.52858
					22.583	22.888		0.830013	6.36943							8.545	31.738		3.34113	67.5676
					13.733	10.986		3.01477	2.1925							14.648	8.24		5.06586	5.33333
					9.155	7.324		1.31268	1.20424							10.071	32.959		23.2019	5.76369
					7.324	7.019		1.22264	6.43501							13.733	7.629		1.77999	1.21832
					8.85	18.311		2.01126	1.77557							23.193	16.479		9.6432	8.41751
					9.766	8.545		0.743716	2.61301							22.278	13.733		2.43902	7.4184
					10.071	12.512		11.325	18.3486							21.973	9.155		1.14797	3.78788
					11.597	11.902		3.24781	11.7647							21.667	28.076		15.748	6.50195
					13.733	8.24		104.167	22.1239							8.545	7.629		6.78887	0.959233
					10.071	8.24		2.63922	42.9185							8.24	8.545		9.62464	6.25782
					8.85	17.7		8.53242	108.696							19.531	7.019		5.8309	1.2387
					18.616	7.629		30.2115	56.4972							8.545	12.512		32.2581	5.86166
					9.766	9.766		3.53607	0.832016							9.46	16.785		4.84027	3.6523
					8.85	10.071		8.14332	2.72926							13.123	15.869		13.1926	1.59642
					16.785	23.804		1.35796	2.68745							16.174	34.485		19.7239	6.07533
					7.629	7.019		0.692281	5.42299							10.071	8.24		0.629525	5.18135
					7.629	18.921		3.61011	2.09952							10.071	13.428		2.19877	14.2857
					11.292	9.46		16.7224	3.1736							8.545	10.681		7.63359	0.833472
					10.986	7.019		5.22193	1.83857							10.681	7.629		8.29876	1.47754
					9.46	9.46		1.62707	1.91131							14.648	9.766		0.341518	5.42888
					16.785	12.817		3.88802	12.4533							13.428	8.24		25	2.78319
					10.376	11.597		28.49	83.3333							8.24	7.324		1.89934	0.889759
					10.681	10.681		7.33676	48.3092							17.09	9.155		5.06586	10.4712
					12.817	8.85		4.09333	38.4615							8.24	7.629		2.81532	22.9885
					9.155	14.038		3.11915	2.58933							9.766	12.207		1.73611	20.9205
					7.935	10.986		4.59982	14.6413							7.019	8.545		2.78784	1.59847
					8.85	8.545		17.331	7.31529							7.324	9.766		1.46349	8.38926
					7.935	12.512		7.29395	9.46074							10.376	25.94		18.0832	5.05051
					7.324	8.545		18.3486	117.647							7.019	12.207		5.79374	4.61255
					26.55	22.583		5.42888	9.1659							9.46	7.935		2.90107	16.3132
					9.766	9.155		1.3887	13.3156							7.629	11.902		8.78735	44.6429
					10.681	7.935		4.19463	8.05802							21.973	12.512		35.461	6.17665
					8.545	7.935		24.0385	9.4697							19.836	15.259		5.27704	4.46229
					7.324	8.85		48.5437	93.4579							10.071	11.597		1.55352	1.8379
					15.869	17.7		7.88644	4.78011							7.324	7.019		2.95946	7.16332
					10.376	95.825		4.73037	35.8423							7.629	8.545		1.84775	6.10874
					9.46	16.174		16.6389	36.9004							9.766	7.629		4.03063	12.8535
					11.597	11.292		34.6021	2.08725							13.428	14.954		2.90444	10.7759
					12.207	9.155		4.34594	7.65697							7.324	10.681		53.1915	1.78031
					13.733	8.545		3.51	1.17994							10.071	12.817		0.947329	2.5641
					8.24	16.479		1.84298	2.62674							11.902	7.324		7.91766	1.00432
					17.7	10.681		2.41138	0.787712							14.038	28.076		11.6009	3.91083
					38.757	14.954		2.8082	5.30504							8.545	8.545		68.9655	5.69152
					8.24	7.629		1.50195	6.04961							9.155	15.869		9.53289	2.32234
					14.343	9.766		5.9988	2.18484							15.564	8.24		16.2866	3.36247
					9.766	11.292		7.38007	9.82318							8.545	9.155		0.93188	5.96303
					12.207	20.752		26.455	4.095							9.766	14.038		20.4082	14.9701
					7.019	10.376		0.761093	8.24402							7.324	9.155		10.2354	0.51557
					23.499	8.85		6.57462	9.43396							8.545	20.142		7.29395	29.2398
					7.935	10.681		2.85633	117.647							13.733	7.935		113.636	10.7875
					7.019	36.926		2.85307	18.1488							9.766	7.324		27.3224	1.54871
					7.019	8.24		20.1207	6.66223							19.531	13.428		2.04708	2.35682
					8.85	20.447		7.25163	1.18723							13.123	16.785		9.42507	0.843241
					7.935	17.09		4.03063	2.36183							23.193	11.597		3.86698	16.129
					7.019	29.602		6.13497	0.983478							24.109	10.071		1.58932	34.4828
					17.7	7.324		4.71921	2.25683							9.155	11.902		3.86548	56.1798
					49.438	7.019		3.91236	3.31126							14.954	9.46		3.49162	11.2108
					10.376	33.569		11.9048	36.9004							11.597	9.46		0.686908	1.42025
					7.019	11.902		2.32396	42.9185							11.597	7.935		9.63391	46.2963
					13.123	31.128		1.87056	18.3824							8.24	8.24		76.3359	3.60231
					18.311	8.24		39.2157	1.85391							10.986	7.935		7.05219	3.07977
					7.324	16.479		111.111	92.5926							7.629	12.207		25.4453	3.83583
					9.155	12.207		28.6533	23.6967							9.766	17.7		1.35501	9.34579
					7.019	26.855		1.95084	20.8768							11.597	11.292		29.4118	12.8535
					17.09	11.292		19.2308	6.64452							11.597	16.174		4.08831	19.2678
					13.733	13.428		1.68379	3.34001							9.46	9.766		1.99203	8.92061
					43.64	12.817		1.54799	0.773455							11.902	7.019		5.76369	6.33714
					8.24	7.935		208.333	16.0514							7.019	14.648		3.29164	5.37634
					15.564	18.311		5.02008	1.04362							31.738	7.935		2.79408	10.101
					9.155	11.902		3.78358	7.45156							7.629	24.109		2.918	3.0581
					11.902	21.667		19.3424	1.29182							32.654	14.648		2.51256	1.02041
					12.817	35.706		27.027	3.30797							12.207	12.512		6.72043	1.67448
					14.954	13.123		5.35045	19.4932							15.564	11.902		4.98256	1.52742
					6.714	16.479		2.15193	58.1395							8.85	7.935		11.8624	2.61986
					12.817	12.207		2.37699	1.88964							7.324	7.935		10.6496	13.4953
					10.071	17.7		1.82782	3.39328							8.545	7.629		1.96734	3.77216
					7.935	20.752		5.62746	1.81094							31.433	19.836		3.56125	24.6305
					7.019	23.193		7.94913	29.4985							12.817	9.46		3.17965	1.60359
					10.071	7.324		1.6675	4.05844							8.85	10.681		5.98444	1.41844
					7.019	11.902		1.01574	6.0241							16.174	18.921		2.59336	1.26422
					17.7	16.479		0.81586	1.38715							16.479	10.986		4.54339	11.6822
					7.019	9.155		1.66834	3.71333							9.766	10.376		27.3973	4.10678
					7.935	11.292		4.98753	3.1736							17.395	8.545		3.74251	16.5563
					11.597	11.597		8.56164	9.86193							10.376	14.648		0.838364	7.65111
					10.071	12.207		23.8663	4.88998							7.324	8.85		5.34188	1.67084
					7.019	28.381		54.3478	21.4592							8.85	36.621		5.11247	6.79348
					8.24	8.85		1.40036	8.92857							14.038	9.46		17.0068	1.14233
					8.545	11.597		5.97372	7.20981							18.616	13.428		7.61035	33.3333
					9.155	8.24		12.1655	5.67215							15.869	20.752		0.807689	1.8843
					9.766	9.46		1.11819	10.4384							9.46	19.836		1.15929	10.5708
					7.935	24.109		0.265161	4.74158							28.992	21.057		2.51762	8.726
					7.935	16.479		2.67308	1.78891							8.85	11.292		11.0254	2.29779
					9.766	23.804		41.4938	5.24934							8.85	7.019		5.05817	8.03213
					39.368	13.123		4.40917	3.23102							9.155	30.518		5.15996	32.7869
					9.766	18.005		0.774174	8.3682							32.349	14.954		9.87167	61.7284
					22.278	10.376		16.5289	2.54777							15.259	11.597		3.38066	1.75162
					7.629	13.428		2.78319	22.1239							7.629	11.292		34.0136	23.31
					7.935	12.207		13.8122	24.3902							11.292	7.324		1.00513	4.4287
					7.324	11.292		19.2678	3.89257							29.907	10.681		172.414	1.97122
					7.935	12.817		3.66166	5.7241							9.155	20.447		11.5207	24.8756
					10.376	23.193		0.790077	3.48311							8.85	8.545		11.2867	1.93125
					8.85	17.395		1.36949	9.63391							7.019	8.24		4.0032	1.80865
					17.09	20.142		6.9735	10.101							12.512	8.545		1.50105	5.24109
					12.817	10.376		1.972	16.6667							7.019	10.986		0.902364	2.94291
					7.935	15.259		2.85307	111.111							10.071	13.123		93.4579	1.57828
					12.512	9.46		6.50618	1.85632							7.019	10.071		5.32481	30.4878
					16.174	15.259		12.285	13.245							11.902	9.46		3.15457	4.03388
					10.986	24.109		16.6113	2.37023							32.349	8.545		32.7869	4.3573
					22.888	9.766		8.34028	1.58128							10.376	15.259		123.457	3.53482
					34.485	11.902		12.0919	15.361							8.24	8.85		7.37463	3.35796
					21.057	8.545		30.7692	5.18941							9.766	9.766		13.8889	1.70648
					12.817	13.733		3.57782	9.13242							17.7	8.545		2.23065	1.26968
					14.038	8.85		3.46981	6.57895							8.24	19.531		0.993739	10.5374
					10.376	13.733		1.43082	3.47826							36.011	11.597		7.52445	2.82725
					8.24	10.376		10.0705	7.64526							18.311	7.935		15.1057	1.41643
					8.85	7.935		2.70563	3.81388							11.292	17.395		4.09836	6.59196
					8.24	11.292		3.93546	4.20698							14.954	7.629		2.74801	20.4918
					7.935	18.311		25.3165	3.73692							18.921	9.766		2.4728	1.68691
					7.629	7.019		2.64971	2.98418							8.24	13.428		6.64452	2.58866
					8.545	10.986		3.8625	59.8802							8.545	10.071		0.745823	12.837
					43.64	10.681		11.0011	31.4465							8.85	14.648		131.579	5.44366
					8.545	26.855		6.41437	1.23609							7.935	24.719		9.61538	4.00962
					7.019	15.259		4.1632	2.43072							7.019	8.85		4.18936	64.1026
					7.019	7.629		0.422869	2.45459							7.629	8.85		7.84314	0.922594
					17.09	8.24		1.79824	5.03018							10.376	7.324		8.1367	27.933
					23.193	16.785		5.10465	2.3912							8.85	20.447		4.28266	19.7239
					25.024	7.019		1.05977	5.14668							34.18	9.766		2.00924	7.87402
					7.324	12.817		1.36631	5.70125							10.681	7.935		3.56761	4.48229
					7.019	10.986		9.62464	2.15471							7.935	7.935		6.00962	36.4964
					9.46	16.174		6.00601	15.5763							17.09	8.545		2.8777	12.285
					11.902	11.292		1.2721	7.8064							24.719	28.381		20.4499	76.9231
					8.24	8.24		5.02008	52.9101							12.512	12.512		2.83768	2.96121
					7.629	32.959		13.7552	5.89971							20.447	8.85		8.34725	3.73274
					21.973	14.648		7.90514	9.6432							22.888	17.7		5.7971	6.22278
					10.986	10.071		38.7597	8.59845							7.324	13.733		21.8818	2.96121
					9.155	10.376		7.74593	4.59137							7.019	29.602		1.29668	3.99042
					11.597	14.343		44.4444	3.41647							17.395	7.629		39.6825	5.90319
					12.512	16.479		0.78883	9.96016							9.155	36.316		1.44134	14.9701
					15.564	13.123		0.484731	9.62464							14.343	11.597		4.09668	7.77605
					7.324	10.681		2.13174	16.2338							10.681	7.629		2.4777	1.71556
					35.706	12.207		3.27332	3.63372							14.648	13.123		35.2113	3.73134
					10.681	7.935		20.3666	9.6432							29.602	10.681		21.645	3.73692
					11.292	7.324		7.33138	4.5683							9.155	17.395		12.9702	1.09218
					10.986	7.324		19.4553	9.09918							10.071	32.654		19.4553	9.32836
					15.869	9.46		7.86782	6.45578							7.324	10.986		11.5875	2.23115
					19.836	8.545		3.87147	17.9533							21.667	11.292		3.34001	16.7785
					13.123	22.888		24.7525	29.7619							11.292	8.24		6.78887	1.54321
					13.733	9.155		30.581	8.34725							8.24	16.785		5.8548	3.51247
					10.376	30.212		3.34896	2.9163							36.926	15.259		21.0084	33.557
					9.766	14.648		8.31947	48.7805							13.123	30.518		59.8802	4.57038
					15.869	8.545		0.3837	6.77048							10.681	22.888		17.7305	6.9541
					7.324	7.629		0.852442	19.084							10.681	11.597		9.09091	6.11621
					7.019	14.038		3.96668	5.26039							11.902	7.324		4.1876	12.4533
					10.986	12.512		5.34188	37.3134							7.629	12.512		2.24921	5.44959
					12.207	8.24		2.29095	4.06339							19.226	11.597		2.04082	43.1034
					41.809	12.512		1.80473	20.6612							7.935	31.433		0.920895	3.10463
					7.629	8.85		106.383	103.093							9.766	16.479		3.33444	12.6743
					9.46	8.545		4.59559	4.92126							7.629	18.005		1.91058	5.75043
					15.259	23.193		2.06186	9.56023							7.935	8.545		8.77963	3.05998
					11.597	7.935		17.1233	5.29101							8.85	11.902		1.82949	17.0358
					23.193	7.324		1.3552	1.02785							7.324	12.207		3.38409	6.78887
					7.324	14.648		1.69262	9.49668							8.24	7.019		6.29723	3.09598
					10.376	8.24		2.26296	46.9484							19.226	10.986		1.09397	6.02047
					20.142	26.55		1.76274	3.31675							7.324	7.324		2.34302	6.54879
					22.278	8.545		0.318461	16.8067							15.259	11.292		9.12409	16.5289
					10.071	12.512		12.5471	2.59269							8.85	20.752		0.94679	3.08642
					8.85	10.681		1.82749	2.76091							48.828	14.038		2.54647	7.06714
					8.24	9.46		13.6799	1.92864							8.545	13.123		4.35161	15.8983
					8.85	9.766		6.67111	76.9231							8.85	12.512		8.75657	24.0964
					8.85	22.583		2.47402	1.47167							8.85	7.935		1.04976	24.5098
					11.597	11.902		1.85082	58.1395							7.324	10.071		7.07714	2.9753
					13.123	9.155		8.51064	83.3333							7.935	9.766		3.6049	2.65957
					7.324	19.531		2.87109	4.53515							15.259	15.259		3.6245	3.59454
					10.986	18.616		4.26621	5.49451							7.324	7.324		10.352	4.84731
					18.616	18.921		34.965	28.7356							7.324	11.292		3.37154	2.81928
					10.681	9.46		9.77517	6.6357							11.597	17.09		5.69152	72.9927
					10.986	10.071		0.771069	13.8504							22.278	12.817		10.9769	12.0919
					22.583	12.512		1.51883	2.28571							7.629	7.935		1.62787	95.2381
					8.85	11.902		4.86381	47.3934							7.935	11.597		9.06618	2.87687
					11.597	13.123		3.89864	2.92912							8.545	8.85		1.72533	14.3885
					11.597	9.46		22.3214	50.5051							7.324	8.85		4.48833	0.731475
					9.155	8.85		4.84496	19.685							7.935	7.324		8.88099	2.97265
					21.362	11.597		1.10205	1.65262							7.935	7.935		1.5586	10.929
					9.155	25.33		4.19463	3.51865							13.123	15.564		5.8309	5.78035
					32.043	13.428		12.1065	5.89623							16.479	10.071		28.0112	23.2558
					14.648	11.902		3.15457	13.4953							7.935	7.019		13.986	2.10128
					7.629	8.545		41.841	7.86164							7.324	18.311		12.1212	0.560067
					10.376	8.545		51.8135	3.22373							8.24	9.766		23.2558	20.1207
					7.324	17.7		13.624	2.72926							7.019	13.123		7.59301	22.2717
					12.512	11.902		2.29463	3.29489							10.681	11.902		3.51124	4.58295
					10.681	7.324		3.95257	3.34113							9.155	8.85		7.07214	40
					9.155	7.019		11.7233	2.80191							12.817	7.935		5.01505	32.4675
					23.499	8.545		2.25479	34.0136							17.09	7.019		1.07319	0.88968
					9.46	7.324		18.3486	5.69152							16.479	16.174		7.20461	5.41419
					24.414	8.85		14.9925	19.0114							7.629	7.324		3.4118	1.45773
					10.376	8.85		1.34066	8.83392							9.155	21.667		7.75194	6.38978
					7.935	14.038		37.594	3.88199							11.902	14.954		16.5837	11.274
					17.395	7.629		5.75374	2.08507							8.85	7.324		3.4965	26.5252
					9.155	11.597		43.29	10.4058							14.648	9.46		8.3612	9.15751
					19.836	7.935		9.5057	1.50083							9.766	15.564		2.22816	1.64204
					12.817	7.935		4.43459	2.52143							8.545	19.226		1.86811	8.63558
					8.24	7.629		0.542358	1.81357							14.954	7.019		11.0619	3.46981
					9.46	10.071		17.5747	2.7894							11.597	7.019		19.685	3.04878
					9.766	16.785		0.983865	1.0102							19.531	18.616		1.79856	1.2631
					14.343	7.324		8.44595	15.6495							14.343	11.902		4.97018	71.4286
					9.46	42.725		2.59067	6.85401							12.512	8.85		5.29661	13.6799
					8.85	10.986		0.334392	2.89268							8.85	82.092		76.9231	3.22477
					9.46	10.681		13.4228	4.65333							9.766	15.564		5.80383	10.8696
					14.954	9.155		8.39631	5.71429							30.212	7.324		2.06654	3.96668
					11.597	14.954		0.624649	1.45243							7.629	8.545		9.14913	2.24972
					15.869	10.376		12.3305	1.92234							8.85	7.629		6.19963	0.806387
					7.324	9.155		2.86287	17.2712							10.376	9.155		4.88998	6.55738
					10.376	13.123		2.20848	5.48546							14.343	10.376		12.6582	11.3507
					10.376	10.376		4.4405	33.3333							45.166	10.376		0.536251	6.59196
					14.954	7.324		4.9334	3.61533							10.681	9.766		16.6945	9.54198
					7.935	19.531		31.1526	11.5741							8.545	10.986		0.897585	16.1551
					7.935	11.597		1.98926	1.59236							11.597	11.902		4.37637	1.26167
					21.057	9.46		16	30.1205							8.24	8.24		3.64166	5.16529
					9.46	8.545		25.9067	3.663							7.935	8.85		6.88705	9.03342
					15.869	12.512		161.29	1.10412							7.019	14.038		9.24214	7.29927
					7.629	7.019		15.6495	37.7358							10.681	10.376		4.53515	6.72495
					8.24	7.324		65.7895	2.50376							8.85	9.155		68.9655	1.63666
					14.343	9.46		18.4502	7.23589							13.123	7.935		1.55812	112.36
					11.902	15.259		3.73692	0.652231							10.681	15.259		1.56863	3.73832
					8.24	8.85		8.11688	1.73732							17.09	17.395		116.279	7.47384
					11.597	11.292		6.22278	3.71885							9.155	28.076		2.45218	13.2275
					13.428	20.142		0.661594	5.8072							7.935	10.681		10.7181	4.11692
					7.629	7.935		4.30108	107.527							7.935	9.155		76.9231	82.6446
					9.46	13.123		3.23206	8.6881							14.038	10.071		2.27324	25.3165
					8.85	7.629		6.60502	11.4943							8.24	9.155		18.8324	16.2338
					41.199	8.24		4.51875	133.333							28.076	13.123		2.37192	9.17431
					32.043	9.46		10.4058	12.1507							13.123	9.46		7.27273	8.96057
					8.24	7.324		10.9769	1.08778							7.629	9.766		0.857045	1.38466
					25.94	7.324		2.42424	15.4321							17.09	7.629		3.02206	23.0415
					14.038	7.629		3.66838	6.6313							8.24	13.123		32.8947	21.5054
					9.155	14.954		2.29095	16.129							11.292	44.25		1.46671	3.44234
					7.629	26.245		5.33049	3.65764							14.038	15.259		9.63391	7.14796
					9.46	7.019		0.70368	35.0877							12.512	13.123		0.822978	20.7039
					18.311	8.85		0.474136	4.19992							38.452	14.648		106.383	1.31527
					10.681	8.24		2.09908	1.24193							9.155	8.24		1.38773	3.32447
					18.311	8.545		12.2549	41.4938							8.545	12.817		2.44021	39.3701
					8.24	7.935		0.976849	4.60193							7.324	10.681		59.8802	2.9036
					10.071	8.545		2.05128	5.68828							15.869	11.597		2.24921	22.5734
					17.09	8.24		1.47059	5.09424							7.324	20.447		3.32005	4.54959
					7.324	10.681		4.12712	26.6667							9.766	12.817		181.818	126.582
					20.142	7.629		4.11692	14.0845							11.597	20.752		1.47319	7.30994
					8.24	31.738		10.2669	49.505							16.479	25.33		2.02675	2.23664
					11.292	14.343		1.60643	17.9211							20.447	8.24		2.84738	3.89105
					10.681	9.155		6.79348	42.0168							7.935	18.616		13.1579	2.29568
					19.531	10.986		19.1571	6.82128							10.071	8.85		46.2963	11.3379
					14.038	13.123		1.81488	5.95948							12.207	15.564		36.63	4.0568
					16.174	8.545		2.04332	46.0829							13.428	23.193		6.52316	6.62252
					9.766	12.817		5.33618	8.37521							25.33	7.629		3.27118	67.5676
					21.362	11.292		59.5238	2.96296							9.155	8.24		5.48546	8.69565
					10.986	7.935		43.1034	12.3001							12.512	11.597		11.236	5.57724
					19.836	12.207		6.15385	2.82885							8.24	9.766		1.1609	4.44247
					13.733	19.836		3.79219	8.1367							8.24	17.7		19.1939	12.4844
					11.597	14.648		14.3266	33.2226							15.564	22.278		1.96928	4.21585
					12.207	12.512		31.0559	2.10659							13.123	7.629		185.185	8.74891
					10.071	75.378		9.00901	7.73994							7.935	15.259		1.61057	3.84468
					10.071	24.414		13.6612	2.29885							11.902	7.019		4.32339	32.3625
					7.019	15.564		4.22119	4.52694							17.7	8.545		22.3214	2.52589
					8.545	21.973		6.45161	1.27877							13.428	7.324		4.92368	13.6426
					10.376	8.85		1.93949	22.5225							9.766	9.155		2.06398	4.4964
					12.512	13.123		29.6736	4.28816							10.071	15.564		19.4932	5.71429
					9.155	12.817		10.9409	34.6021							14.648	10.376		4.55581	7.34214
					16.479	35.095		2.03915	2.28728							14.038	8.545		5.71429	2.66809
					9.766	7.324		3.50263	27.8552							10.681	33.264		14.4092	1.57332
					13.428	11.597		8.37521	13.3511							17.09	15.869		7.28863	5.96659
					36.011	13.428		6.27746	10.6157							19.836	14.038		3.19285	4.71254
					43.64	7.324		8.76424	4.57666							8.85	7.629		13.9276	16.6389
					9.155	7.629		0.513532	1.25802							39.673	8.545		14.8148	4.36491
					8.24	10.071		1.46671	5.55556							15.869	8.545		23.4742	3.71747
					7.324	12.207		13.6986	8.41751							8.545	7.629		6.44745	2.95421
					8.545	12.817		0.866551	6.69792							15.564	25.94		16.5017	6.2461
					7.019	27.161		0.149609	1.54943							8.85	23.804		2.87604	7.30994
					10.681	11.902		3.19898	8.48896							7.935	8.24		3.77216	151.515
					7.324	7.019		11.5473	5.87889							10.376	11.597		10.6496	22.9885
					8.545	21.057		27.6243	17.1233							8.545	20.447		5.87544	5.06073
					10.071	27.771		3.39674	21.7865							8.85	9.766		3.39674	45.8716
					10.986	14.038		3.96983	9.26784							11.902	13.733		6.66667	15.1057
					21.057	18.921		28.8184	59.8802							14.954	7.935		2.28363	11.5075
					9.46	8.85		12.5313	11.8343							10.681	8.24		3.02755	43.29
					15.869	8.24		14.4509	6.81663							25.635	26.55		1.09649	23.1481
					7.935	8.85		7.12251	7.47384							17.09	9.46		9.29368	3.24992
					7.935	40.588		7.06215	4.4843							11.597	10.376		3.41413	35.0877
					8.85	10.681		9.22509	2.43605							11.902	16.479		4.88998	1.95351
					11.292	12.207		35.7143	13.6986							29.297	17.7		9.02527	10.8342
					20.142	18.616		16.2075	15.5763							8.545	8.24		5.48546	12.3457
					7.935	10.376		3.49406	10.7643							7.019	26.245		99.0099	54.3478
					8.85	10.376		28.2486	15.083							9.46	27.466		5.15464	4.3802
					10.681	10.376		6.64011	11.4286							11.597	9.155		28.4091	6.49351
					7.935	8.24		10.2775	13.2979							14.038	8.85		2.67594	3.08071
					17.7	7.324		44.4444	14.2045							7.935	14.954		172.414	1.63908
					39.368	17.09		15.748	47.3934							17.7	7.935		2.74198	3.07031
					7.935	9.155		84.7458	4.61467							9.766	10.376		106.383	9.81354
					8.85	9.46		1.58378	0.787588							10.071	14.343		4.914	4.49236
					8.24	13.733		17.301	1.67813							7.935	15.564		7.28863	2.85633
					11.902	8.545		1.8843	3.36814							7.935	10.681		12.4688	14.2653
					10.681	10.071		2.85388	2.15332							9.46	13.123		0.71541	7.73395
					7.019	14.038		2.92227	136.986							15.259	8.85		16	6.67111
					7.324	7.629		1.64258	15.7729							12.512	9.46		35.7143	0.419234
					11.902	9.46		8.16993	9.70874							24.719	22.888		40.9836	3.71885
					10.681	7.324		1.74338	73.5294							9.46	25.33		9.92063	1.09806
					10.376	7.629		72.4638	26.8097							19.531	13.733		10.01	14.5985
					8.24	51.27		1.16104	11.4025							20.752	9.155		0.916003	3.66972
					7.324	7.629		20.7469	7.07714							36.316	8.24		6.64894	42.0168
					8.545	7.935		7.29395	6.16143							12.817	37.537		2.6617	2.55428
					14.343	15.564		7.04722	12.3153							7.935	8.545		9.8912	2.16685
					14.648	7.019		0.895736	2.05212							9.46	8.24		4.40141	2.67165
					10.376	11.292		30.4878	3.63636							7.324	8.85		12.0919	4.96278
					15.259	25.635		2.11551	3.6846							7.629	10.986		7.08215	32.1543
					8.24	11.292		0.476327	1.97707							17.09	10.376		8.29187	2.78707
					11.597	17.395		21.4133	10.6383							19.531	8.545		1.60901	5.57724
					14.954	31.128		0.989022	6.0241							8.545	14.954		7.72201	1.78221
					48.218	9.46		40.4858	2.83607							7.629	25.635		4.662	8.14996
					7.935	10.071		8.14332	30.4878							9.766	7.324		8.23045	54.9451
					8.85	14.038		3.26264	4.05186							10.071	7.019		4.71032	0.877116
					9.46	8.24		8.30565	5.17598							9.46	14.343		9.44287	6.09756
					13.123	9.155		18.5185	8.65801							7.629	8.24		1.18694	9.97009
					12.207	11.292		7.02741	3.30579							18.616	19.226		4.09165	1.84536
					14.038	11.597		15.3139	3.01841							7.629	11.597		6.45578	10.5485
					8.24	13.428		20.8768	6.9979							13.123	24.719		0.853315	9.88142
					7.324	14.038		1.51814	6.57895							8.545	7.629		13.3511	1.61264
					17.7	9.46		0.856311	6.65336							10.376	7.935		26.455	7.23589
					32.959	7.019		2.63296	23.8663							7.629	8.545		1.5921	2.25683
					7.324	7.629		32.1543	2.47402							8.545	9.766		36.3636	8.5034
					13.123	10.681		5.9952	35.3357							11.902	11.597		1.30839	7.68049
					63.782	7.324		28.7356	2.86041							54.016	8.545		4.0783	9.07441
					7.324	48.828		2.27946	17.6367							17.09	12.817		2.27015	7.98722
					22.583	11.292		1.2133	0.9993							7.935	12.817		9.5057	18.6916
					17.09	30.518		14.9031	6.05327							25.635	7.629		29.7619	1.25739
					24.109	14.343		18.4162	2.89771							14.038	13.733		6.94927	22.0264
					13.733	7.324		2.70343	1.28518							7.629	10.376		3.12793	4.0568
					7.324	8.24		2.0842	6.25391							7.019	8.545		128.205	13.6426
					7.935	8.545		2.60213	7.35294							17.09	14.343		1.17371	10.4932
					10.376	15.259		4.44247	60.6061							11.902	8.24		6.84932	149.254
					8.24	9.155		1.5006	3.0349							7.629	26.855		1.2387	1.23824
					28.381	8.85		19.802	12.285							12.207	15.869		17.8253	13.3511
					24.109	7.324		48.7805	2.58799							9.46	8.24		1.8031	1.7135
					25.635	13.733		22.6244	2.7894							12.817	23.193		67.1141	27.7008
					11.597	11.902		24.2718	6.4433							10.071	12.817		9.61538	13.1234
					10.071	8.545		2.58665	57.1429							9.766	11.902		5.57724	1.66611
					7.324	8.24		11.4811	3.03951							10.681	12.512		11.7925	2.3084
					9.46	7.629		3.37041	6.09385							7.324	7.629		4.05022	2.35571
					15.259	21.973		16.3399	4.16146							35.706	21.362		1.25612	5.88235
					13.428	14.954		4.77783	19.2678							10.071	8.24		6.00601	1.76118
					12.512	20.752		4.70146	6.1237							10.681	7.324		2.03417	15.873
					21.973	9.766		6.75676	23.2558							15.869	11.597		4.70146	12.9366
					7.935	24.719		0.64255	2.61165							7.324	13.123		10.5042	5.98802
					8.545	14.038		0.801667	3.06185							25.33	11.292		3.12012	5.75705
					14.954	44.25		3.37382	1.01184							10.071	7.019		69.4444	3.37496
					8.24	10.681		1.46563	37.4532							11.292	14.343		22.8311	15.8983
					7.935	14.954		3.75094	42.1941							20.447	7.019		2.98954	1.42613
					12.817	19.226		3.28192	2.75482							7.019	7.019		15.7233	2.05634
					13.123	32.043		4.12201	2.23564							10.071	11.292		1.70271	4.76872
					10.986	8.545		13.3156	3.26584							32.043	8.85		9.90099	9.08265
					9.155	34.485		4.98008	0.878966							8.24	18.005		0.762602	16
					11.597	8.545		4.42087	11.8765							24.414	9.155		24.6305	6.60939
					10.071	9.155		16.9779	9.52381							19.836	28.076		3.1211	4.01768
					18.311	7.019		2.77778	4.61255							10.986	16.479		16.5837	11.7925
					7.629	25.33		20.9644	2.81373							8.545	22.888		7.29395	7.44602
					8.85	10.071		5.70776	30.303							8.85	19.531		2.936	8.09717
					7.019	10.071		4.17362	5.32765							15.869	28.381		1.89072	11.0132
					12.817	8.85		15.0602	2.42014							9.46	9.46		49.505	5.54324
					11.292	10.681		48.3092	33.3333							14.954	7.629		2.50878	12.5471
					9.155	7.935		6.68003	3.02115							9.766	12.512		7.62777	10.5597
					10.986	11.902		10.3627	0.806777							16.174	8.545		1.38236	25.0627
					11.597	7.629		9.07441	29.4118							14.648	7.629		8.94454	43.1034
					12.207	7.935		9.85222	7.35294							19.226	8.545		5.01756	0.822774
					7.324	46.387		1.51103	5.09424							9.766	7.324		11.8906	13.5318
					10.071	8.545		2.97265	1.45582							18.921	14.954		6.29327	2.45942
					14.648	11.292		2.90951	1.83621							11.292	13.428		3.57654	2.01207
					7.324	13.428		1.83959	22.9885							11.902	7.019		9.68992	10.2669
					7.019	8.545		17.6991	1.63961							9.155	12.512		1.97707	3.78215
					17.09	10.986		2.84495	6.035							13.428	11.597		3.47222	33.3333
					7.629	8.24		0.656901	2.32558							141.602	29.602		25.3165	2.38209
					15.564	7.629		2.90613	10.6952							7.629	9.766		0.75815	3.41997
					17.7	13.428		54.6448	7.3692							30.823	10.986		28.0112	1.94477
					8.24	7.629		16.6667	12.0482							8.24	7.324		5.76369	7.49064
					8.545	31.433		2.87936	2.1182							8.24	11.902		31.9489	14.771
					9.766	8.24		19.084	21.097							10.071	36.316		70.4225	11.7509
					23.193	8.85		23.3645	0.662822							9.766	7.324		1.5186	1.28452
					9.155	8.85		6.67111	1.61786							17.09	12.512		1.7819	6.55308
					13.733	8.24		32.1543	3.38639							12.817	16.174		5.04286	4.08998
					10.071	16.479		7.25689	8.60585							8.85	15.564		5.78369	35.9712
					7.019	9.46		1.97433	17.5439							25.635	25.33		2.31696	5.03778
					13.428	7.935		24.57	3.58938							7.019	38.757		67.1141	1.71674
					12.512	10.071		1.62628	1.59413							10.071	8.24		31.746	9.92063
					15.564	8.85		7.4129	0.752332							9.155	7.019		1.47449	9.1659
					8.545	7.629		3.25415	7.88022							14.648	15.564		3.51494	29.0698
					9.46	61.34		1.35906	2.95247							7.324	18.005		3.9032	1.8875
					7.629	22.583		33.4448	3.61011							10.986	7.324		3.89105	3.58809
					7.019	24.719		21.7865	9.59693							20.142	11.597		2.63713	4.29
					13.123	9.155		2.67881	28.49							7.935	7.935		12.8866	4.71698
					14.954	12.817		2.09908	64.9351							12.512	7.324		53.1915	2.91375
					9.46	8.24		2.65322	68.4932							22.888	15.869		1.26759	79.3651
					11.292	8.545		2.51319	4.93583							7.935	11.292		1.03338	2.83126
					14.648	15.564		4.68384	2.93772							32.654	12.207		7.0028	3.83436
					16.785	10.986		0.523807	4.03877							12.817	18.311		0.562208	1.3224
					9.46	10.986		3.71885	20.5339							12.207	19.836		9.02527	2.8393
					10.071	11.292		11.8906	6.01685							7.935	20.142		18.315	2.14638
					24.109	14.954		5.27426	2.37079							12.817	11.902		1.41945	33.2226
					11.902	19.836		16.6667	1.66223							7.935	9.155		3.16056	140.845
					10.986	18.005		1.29971	0.660546							11.902	7.019		16.1812	9.27644
					14.343	11.597		18.5874	11.3636							14.343	13.428		21.7865	2.65252
					26.55	8.24		3.69959	10.1833							20.447	11.902		15.8983	6.96379
					8.85	9.46		6.45578	7.92393							28.076	14.343		9.62464	17.452
					12.512	20.447		22.2222	3.00661							27.161	65.308		11.534	3.83142
					7.629	10.986		9.34579	10.8225							10.071	9.766		151.515	2.69107
					7.324	7.935		1.02459	8.21693							8.24	27.161		1.98807	12.6103
					14.343	18.921		3.15358	4.47427							11.597	24.109		12.5945	9.80392
					8.545	7.324		2.29674	12.0337							14.038	8.545		29.3255	2.31803
					7.324	9.46		0.746993	45.8716							7.935	15.564		1.65098	12.837
					9.155	10.986		4.72813	12.1212							10.681	14.343		1.8622	6.1237
					11.292	13.733		7.04225	3.64431							7.019	9.155		2.67165	1.73611
					14.648	12.817		8.38926	18.2149							10.376	23.804		11.1359	1.18245
					7.019	13.733		18.4843	5.80383							7.019	8.85		1.99005	12.3609
					16.785	7.935		15.2439	5.27148							9.766	12.512		5.17331	11.7925
					12.817	15.564		0.846167	4.11692							12.817	9.766		0.567376	9.35454
					9.155	12.207		22.1239	24.6305							9.46	13.123		196.078	6.04595
					13.123	16.174		1.47341	1.1805							16.785	9.155		15.7233	81.3008
					11.292	19.226		3.41763	0.707164							10.071	7.935		6.0241	2.92826
					31.128	9.766		0.399186	3.81534							9.46	7.935		3.64033	1.22489
					20.752	8.545		10.2041	1.03734							24.719	8.24		5.44366	2.05931
					7.629	7.935		40.3226	1.74398							8.85	8.545		1.8615	2.96033
					21.362	7.324		22.3214	1.78317							61.646	12.512		10.846	3.47102
					10.681	11.292		25.3807	26.3852							10.376	9.155		24.0385	4.79386
					7.324	9.766		3.00933	243.902							7.935	9.766		2.93169	8.49618
					9.46	16.479		25.5102	75.7576							10.071	18.311		33.8983	119.048
					12.817	8.85		5.70125	9.17431							12.207	8.24		12.1359	1.06326
					32.349	10.986		3.75799	43.29							11.292	19.226		27.248	47.3934
					13.733	7.935		28.6533	6.85871							9.46	18.616		7.55858	1.30225
					7.935	10.681		2.19635	19.3424							12.512	8.24		3.73972	9.80392
					22.278	15.259		5.76037	19.3424							14.954	11.597		27.6243	4.69484
					9.155	16.174		1.93798	11.4155							8.24	7.629		53.1915	26.5957
					14.343	9.46		2.18341	4.68384							25.33	11.902		7.06215	7.61615
					11.292	14.648		14.9254	8.05802							17.7	13.733		2.59605	208.333
					9.46	10.681		23.0415	2.20216							16.785	9.46		5.07357	19.6464
					8.545	10.681		5.06586	1.86463							13.733	16.785		3.56125	1.60875
					11.902	7.019		28.0112	24.1546							11.902	9.766		4.1425	10.2354
					11.902	30.212		2.86123	0.615309							10.986	14.648		74.0741	2.25175
					13.733	13.428		11.6822	14.3885							7.019	9.766		37.4532	21.2314
					11.597	14.954		46.5116	17.9533							9.766	20.142		2.26757	2.41313
					17.395	35.4		3.31565	9.81354							23.193	36.621		39.8406	52.6316
					23.193	8.85		9.60615	9.84252							20.142	10.376		2.07727	1.1976
					7.935	24.109		5.15996	1.8352							7.019	10.986		16.2075	17.4216
					15.564	8.85		12.3609	2.91971							15.869	7.324		1.40174	1.5193
					11.292	10.986		28.3286	3.66569							34.79	9.155		1.82648	1.1325
					9.155	9.766		16.3132	10.8225							8.24	9.155		2.59471	13.1234
					10.376	10.376		18.1159	46.0829							7.324	11.597		1.15473	1.657
					14.954	12.512		15.0602	32.7869							21.057	21.973		2.94724	5.40833
					7.019	9.155		4.90196	3.16656							7.019	12.207		3.01386	4.10846
					14.343	9.155		1.28932	35.9712							10.986	16.174		1.40825	4.37637
					11.902	17.7		32.8947	14.4928							14.648	10.071		42.0168	2.37417
					10.071	34.18		12.9199	12.6904							10.376	9.155		74.6269	6.07165
					16.174	10.376		1.1288	6.64452							14.343	12.512		64.9351	4.34972
					10.986	7.629		10.5597	6.8306							8.85	7.935		6.10128	2.1254
					7.324	7.935		0.675265	4.92611							7.324	22.278		1.6072	0.719373
					12.207	20.752		1.37779	2.42836							9.766	15.259		0.359002	1.6728
					7.324	10.376		0.473619	153.846							9.155	16.479		4.42674	3.16556
					8.24	8.24		2.00763	3.89257							7.324	7.019		5.88235	7.71605
					9.155	7.019		4.19111	2.54323							16.479	15.259		4.0016	3.465
					7.324	9.46		1.40825	18.1488							11.902	13.123		0.75375	3.36134
					8.24	7.935		3.71885	29.9401							18.921	12.207		16.5017	2.00844
					7.629	9.155		1.3048	11.0132							19.836	7.935		2.52653	17.9533
					26.245	18.005		5.29101	17.0358							28.381	16.479		1.523	14.2248
					21.362	9.155		10.5152	2.97442							7.629	9.766		2.88434	4.46628
					7.019	20.752		4.60193	5.44366							30.823	10.681		51.8135	6.46412
					8.85	13.428		2.64131	40.8163							8.545	19.226		18.018	2.39464
					10.986	31.128		8	72.4638							14.954	11.597		1.35925	2.42189
					14.343	15.564		3.73692	8.54701							7.324	15.259		12.6263	3.75657
					14.648	31.433		58.1395	7.85546							7.629	10.681		2.38039	20.2429
					7.019	15.869		22.3214	27.027							9.155	7.935		1.34716	25.7732
					9.46	13.733		11.8343	71.9424							8.545	40.283		8.38223	9.88142
					17.09	9.46		84.0336	4.53721							12.207	16.785		24.6914	2.43784
					10.376	15.869		5.65291	0.987654							8.85	8.85		2.06356	41.1523
					17.09	10.681		52.9101	4.33276							8.85	7.629		1.18906	3.23206
					22.888	23.193		10.989	1.76991							15.564	27.771		16.7224	12.9702
					10.681	7.629		10.4167	10.6952							7.019	10.071		3.56379	42.1941
					34.79	8.24		3.43997	13.9276							18.921	9.46		2.76014	9.48767
					7.935	13.123		2.73973	7.29927							12.817	9.46		3.71471	11.3122
					7.324	21.362		4.41112	2.39751							15.564	8.545		9.49668	8.10373
					12.512	8.545		11.4416	8.84956							10.681	27.466		15.6986	17.6056
					9.766	11.292		38.7597	1.32503							12.512	12.512		3.63108	1.56495
					20.142	12.512		1.7188	7.03235							11.292	7.935		1.67616	0.670286
					12.817	12.512		2.48694	12.1655							50.964	8.85		19.5695	28.2486
					7.324	7.629		10.0705	44.843							19.836	10.681		4.46628	2.11551
					26.55	7.935		7.83699	37.594							32.349	7.935		3.47102	181.818
					9.766	7.324		7.0373	1.89466							9.766	11.902		9.5511	3.89864
					7.935	9.46		2.23864	12.1507							36.316	13.123		1.33761	3.22373
					8.24	10.681		14.6843	5.12558							9.766	12.512		3.04599	14.3472
					7.019	8.24		3.40599	27.1739							14.343	8.545		23.4742	35.8423
					19.226	9.155		2.16873	1.4652							7.935	12.207		1.46585	1.79824
					13.428	21.973		3.46861	45.045							18.616	10.071		5.07099	3.9968
					14.038	8.545		11.7786	7.45712							18.311	18.311		14.5349	3.20616
					15.564	11.597		2.15657	1.14863							8.545	16.174		1.2273	24.3309
					8.24	7.324		1.2089	4.60193							9.766	8.24		1.06735	6.62252
					10.376	8.24		9.43396	2.61097							12.207	8.24		4.59559	1.41583
					10.071	7.324		0.786596	0.655437							11.597	26.245		9.40734	2.72702
					12.512	10.681		1.79147	5.84454							20.447	9.155		4.91642	2.6976
					23.193	8.85		0.81646	5.81395							17.395	9.155		128.205	10.6724
					10.986	18.311		2.31267	28.7356							7.629	18.616		13.5501	6.76133
					15.869	7.935		36.1011	29.7619							12.817	12.817		6.4433	20.7469
					11.292	19.531		6.72948	5.75043							20.447	12.817		13.1579	1.16973
					9.155	9.766		3.73134	30.9598							10.681	13.733		149.254	0.7347
					10.681	9.766		14.4092	7.68049							35.4	20.447		2.29463	178.571
					7.324	30.518		2.53229	17.8253							13.428	8.545		44.0529	3.4153
					8.85	64.697		2.55363	6.5445							7.629	18.311		3.16356	7.99361
					15.869	27.771		1.59185	10.1937							8.545	7.019		9.82318	3.31016
					7.629	8.545		3.57654	2.55689							14.954	8.545		2.55037	6.06061
					19.531	17.395		8.82613	26.3852							12.512	13.123		3.39098	13.6986
					9.155	9.766		41.1523	2.32288							33.569	7.019		5.89275	13.8313
					72.327	8.24		12.87	1.98649							7.629	12.512		4.69043	5.03525
					8.24	11.902		10.5485	17.094							13.733	7.019		4.27533	3.08547
					8.24	7.019		11.1111	2.87191							14.343	9.766		3.91389	2.81928
					7.019	19.836		10.9051	8.02568							8.85	10.681		4.3122	0.478446
					12.512	20.752		16.5289	18.315							12.512	14.648		0.858885	3.58423
					8.85	15.564		14.9254	44.2478							9.46	18.616		11.9617	10.3306
					9.766	12.207		55.2486	8.07103							7.629	9.155		12.837	163.934
					9.46	7.019		1.03616	2.45399							7.629	11.597		21.2314	1.23305
					8.85	10.986		1.82249	3.07598							10.071	18.311		13.3869	6.60939
					10.376	9.766		4.29	0.897747							9.46	7.935		34.0136	128.205
					15.259	10.681		1.21729	7.08717							10.986	15.259		0.892538	3.78644
					19.836	10.376		3.85802	1.86672							18.616	16.785		5.82072	27.4725
					28.381	13.428		2.50752	26.178							9.46	17.395		5.25486	10.4822
					11.902	11.292		4.85909	3.03767							48.523	10.681		2.18675	2.918
					10.071	7.935		107.527	50.5051							7.935	8.24		21.0084	5.43478
					9.46	9.766		4.92854	56.4972							8.24	14.038		2.13265	52.9101
					7.324	7.629		8.77963	3.43525							9.155	7.629		4.72367	2.52717
					8.24	10.071		4.25351	3.49284							7.629	20.752		13.5318	6.78426
					12.817	15.869		18.6567	9.79432							7.324	26.245		3.98248	1.00644
					7.019	8.24		2.19732	22.5225							11.292	7.629		6.69792	6.47249
					11.292	10.376		0.477783	20.7039							15.869	7.935		3.16056	6.39795
					15.564	7.019		0.461425	22.8833							22.888	8.545		3.59971	2.20653
					7.629	8.24		9.85222	2.5413							13.733	13.428		16.3666	3.56633
					19.226	62.256		3.39213	2.97885							9.766	18.005		16.1812	8.74126
					9.46	9.155		19.802	2.39981							8.545	7.629		0.890948	17.7305
					10.376	14.648		14.5985	32.5733							17.09	8.85		20.1207	2.33699
					7.019	14.038		0.809782	3.72024							8.24	16.785		0.970403	1.35281
					9.155	16.479		3.91543	1.21242							9.46	8.24		11.6822	8.12348
					14.954	8.85		16.6945	11.1732							8.24	8.85		6.90608	1.24008
					7.324	8.545		1.92419	15.3846							22.888	26.855		0.963298	11.919
					8.85	15.259		1.42878	6.86342							13.428	10.681		5.73723	14.1844
					8.24	10.986		4.31965	11.8906							8.545	7.324		7.46269	2.6824
					10.376	10.071		1.89215	3.80662							10.986	19.836		1.5868	2.69833
					14.954	13.123		2.80269	2.16826							8.85	19.226		163.934	9.78474
					13.428	7.019		1.35263	6.20347							7.019	7.935		2.17865	6.8918
					10.986	10.986		8.40336	8.80282							14.343	10.376		9.3985	4.60829
					7.324	12.207		1.88111	2.79877							7.019	9.766		7.54148	22.9885
					8.85	12.512		16.4474	9.35454							18.921	8.24		7.36377	22.6757
					16.479	20.142		21.1864	27.4725							63.171	10.986		53.1915	1.41363
					30.823	43.945		31.6456	0.810307							8.545	8.545		2.18675	16.1812
					8.85	10.071		14.1443	13.369							7.935	12.512		4.55581	1.66141
					7.935	13.733		34.0136	17.9533							7.935	10.681		1.40964	45.6621
					21.973	10.681		44.843	6.23441							8.24	7.629		3.24781	3.25521
					15.564	10.986		2.24467	0.571429							15.259	12.512		10.5042	3.58551
					7.935	27.771		11.8483	2.26398							8.24	7.019		2.0555	99.0099
					18.311	17.395		3.78358	70.922								7.019			29.4118
					13.428	7.629		2.30787	5.70451								7.629			5.95948
					38.757	11.902		2.87109	50.5051								20.142			0.909587
					7.019	12.207		33.557	17.9211								21.667			1.3344
					19.836	9.155		10.2249	5.30504								11.597			7.33676
					14.648	8.85		4.41501	4.61255								8.24			4.54339
					9.46	17.09		2.66738	26.9542								10.376			2.42307
					10.376	24.109		9.85222	3.80228								11.292			131.579
					15.564	7.629		4.73037	3.25203								16.174			22.3714
					25.33	10.986		11.1235	4.81928								37.231			3.58551
					7.935	12.207		1.02554	34.7222								28.687			6.33714
					20.142	13.733		5.09944	4.55581								21.362			2.53293
					14.954	7.324		1.18821	6.95894								13.733			3.52609
					7.019	8.24		0.999001	8.21693								12.207			10.2354
					7.935	11.597		1.92234	99.0099								20.447			2.28624
[truncated: 1,668 more rows]

## Sheet: Fig 6.
Fig. 6
1US	Panel c	Panel d	Panel e		1US	Panel c	Panel d	Panel e			3US	Panel f	Panel g	Panel h		3US	Panel f	Panel g	Panel h			1US		Panel i	Panel j	Panel k	Panel l		3US		Panel m	Panel n	Panel o	Panel p
	tdTom-	tdTom-	tdTom-			tdTom+	tdTom+	tdTom+				tdTom-	tdTom-	tdTom-			tdTom+	tdTom+	tdTom+
Spine	Spine volume	Spine head volume	Spine length		Spine	Spine volume	Spine head volume	Spine length			Spine	Spine volume	Spine head volume	Spine length		Spine	Spine volume	Spine head volume	Spine length			Group	Dendrite	Overall	Stubby	Thin	Mushroom		Group	Dendrite	Overall	Stubby	Thin	Mushroom
tdT-_210128_Slice2_Cell2_AP_100000000_610000000251	0.300913	0.164224	3.42057		tdT+_210127_Slice1_Cell1_AP_100000000_610000006364	0.324004	0.164836	1.36887			tdT-_210126_Slice1_Cell1_AP_100000000_610000001304	0.298364	0.0477754	3.43881		tdT+_210126_Slice2_Cell2_AP_100000000_610000000875	0.534124	0.269556	4.63299			tdTom-	tdT-_210128_Slice2_Cell2_AP	13.6202	1.94574	2.72404	8.95043		tdTom-	tdT-_210126_Slice1_Cell1_AP	9.06614	2.78281	4.37299	8.5144
tdT-_210128_Slice2_Cell2_AP_100000000_610000000287	0.240624	0.0536928	3.74966		tdT+_210127_Slice1_Cell1_AP_100000000_610000005671	0.284208	0.130139	1.57192			tdT-_210126_Slice1_Cell1_AP_100000000_610000001373	0.164635	0.0759704	3.37438		tdT+_210126_Slice2_Cell2_AP_100000000_610000000959	0.460575	0.200256	4.50067				tdT-_210128_Slice2_Cell2_AP001	15.8542	4.22778	4.49202	7.13438			tdT-_210126_Slice1_Cell1_AP001	9.93862	3.19981	3.91088	1.95544
tdT-_210128_Slice2_Cell2_AP_100000000_610000000354	0.147104	0.128941	2.22301		tdT+_210127_Slice1_Cell1_AP_100000000_610000005700	0.271784	0.212841	1.32442			tdT-_210126_Slice1_Cell1_AP_100000000_610000002805	0.0264103	0.0172863	0.547413		tdT+_210126_Slice2_Cell2_AP_100000000_610000001044	0.0352215	0.020937	0.999929				tdT-_210128_Slice2_Cell2_AP003	15.8166	4.94269	5.18982	5.43696			tdT-_210126_Slice1_Cell1_AP001#2	14.5961	3.28991	4.05448	2.78281
tdT-_210128_Slice2_Cell2_AP_100000000_610000000394	0.261869	0.169123	2.91004		tdT+_210127_Slice1_Cell1_AP_100000000_610000005725	0.53121	0.249856	1.95759			tdT-_210126_Slice1_Cell1_AP_100000000_610000001096	0.150371	0.0943132	3.49669		tdT+_210126_Slice2_Cell2_AP_100000000_610000001060	0.076948	0.0424395	1.6382				tdT-_210128_Slice2_Cell2_AP004	9.97562	4.98781	2.68574	2.30207			tdT-_210126_Slice1_Cell1_AP002	12.1474	2.02724	4.80834	4.04913
tdT-_210128_Slice2_Cell2_AP_100000000_610000000449	0.172808	0.0896627	2.51002		tdT+_210127_Slice1_Cell1_AP_100000000_610000005761	0.0616339	0.0480752	0.846207			tdT-_210126_Slice1_Cell1_AP_100000000_610000001888	0.0364809	0.0225824	0.962747		tdT+_210126_Slice2_Cell2_AP_100000000_610000001094	0.239721	0.13203	1.95407				tdT-_210128_Slice3_Cell1_AP	17.6155	3.89574	4.91202	8.80775			tdT-_210126_Slice1_Cell2_AP	14.9908	2.95247	4.31243	5.90495
tdT-_210128_Slice2_Cell2_AP_100000000_610000000498	0.136346	0.112	1.24846		tdT+_210127_Slice1_Cell1_AP_100000000_610000005782	0.362802	0.167771	1.49382			tdT-_210126_Slice1_Cell1_AP_100000000_610000001907	0.0885617	0.0336095	1.33561		tdT+_210126_Slice2_Cell2_AP_100000000_610000001131	0.168007	0.0232185	2.12693				tdT-_210128_Slice3_Cell1_AP001	15.6711	3.59665	3.59665	8.47782			tdT-_210126_Slice1_Cell2_AP001	15.2467	3.28566	4.5565	7.39274
tdT-_210128_Slice2_Cell2_AP_100000000_610000000510	0.0638396	0.0364598	1.2042		tdT+_210127_Slice1_Cell1_AP_100000000_610000005808	0.446701	0.265375	1.99949			tdT-_210126_Slice1_Cell1_AP_100000000_610000001936	0.0542661	0.0383221	0.92722		tdT+_210126_Slice2_Cell2_AP_100000000_610000001169	0.218683	0.0543742	2.48036				tdT-_210128_Slice3_Cell1_AP002	15.3496	4.28361	3.92664	7.13935			tdT-_210126_Slice1_Cell2_AP002	11.5639	5.08224	6.49594	5.60799
tdT-_210128_Slice2_Cell2_AP_100000000_610000000534	0.116621	0.0528488	2.00086		tdT+_210127_Slice1_Cell1_AP_100000000_610000005845	0.180012	0.0638738	1.11005			tdT-_210126_Slice1_Cell1_AP_100000000_610000001958	0.317506	0.14243	2.67856		tdT+_210126_Slice2_Cell2_AP_100000000_610000001220	0.26332	0.0671918	3.06238				tdT-_210128_Slice3_Cell1_AP003	16.7309	8.83542	4.32371	3.57176			tdT-_210126_Slice1_Cell2_AP003	13.2084	4.54716	2.70643	2.16531
tdT-_210128_Slice2_Cell2_AP_100000000_610000000574	0.197732	0.129175	2.17182		tdT+_210127_Slice1_Cell1_AP_100000000_610000005867	0.45913	0.242144	1.7784			tdT-_210126_Slice1_Cell1_AP_100000000_610000002013	0.111946	0.0511373	1.89582		tdT+_210126_Slice2_Cell2_AP_100000000_610000001273	0.112747	0.0343601	1.76078				tdT-_210204_Slice2_Cell1_AP001	19.147	6.02776	3.90032	9.21893			tdT-_210126_Slice3_Cell1_AP001	15.3677	2.9982	2.69838	7.41887
tdT-_210128_Slice2_Cell2_AP_100000000_610000000617	0.229728	0.139674	2.19831		tdT+_210127_Slice1_Cell1_AP_100000000_610000005899	0.178192	0.112923	0.687213			tdT-_210126_Slice1_Cell1_AP_100000000_610000002053	0.0843034	0.0471757	1.18671		tdT+_210126_Slice2_Cell2_AP_100000000_610000001308	0.192631	0.0756871	1.98577				tdT-_210204_Slice2_Cell1_AP002	16.4883	6.16046	3.44261	6.88522			tdT-_210126_Slice3_Cell1_AP002	10.2791	3.97439	3.97439	4.15537
tdT-_210128_Slice2_Cell2_AP_100000000_610000000654	0.0616748	0.0207961	1.15996		tdT+_210127_Slice1_Cell1_AP_100000000_610000005935	0.406117	0.154582	1.29481			tdT-_210126_Slice1_Cell1_AP_100000000_610000002082	0.218816	0.0375523	1.72953		tdT+_210126_Slice2_Cell2_AP_100000000_610000001348	0.246733	0.0697723	2.73793				tdT-_210204_Slice2_Cell1_AP003	14.7606	5.76024	4.86021	4.14018			tdT-_210126_Slice3_Cell1_AP003	7.19568	2.84315	3.28055	1.4991
tdT-_210128_Slice2_Cell2_AP_100000000_610000000678	0.2609	0.145039	1.86524		tdT+_210127_Slice1_Cell1_AP_100000000_610000005606	0.224022	0.118155	1.0623			tdT-_210126_Slice1_Cell1_AP_100000000_610000002118	0.0705648	0.0243305	1.4202		tdT+_210126_Slice2_Cell2_AP_100000000_610000001395	0.294066	0.0890294	2.78199				tdT-_210204_Slice2_Cell1_AP004	17.3363	6.15157	10.6254	0.559234			tdT-_210126_Slice4_Cell1_AP	11.9084	4.75404	4.99174	4.99174
tdT-_210128_Slice2_Cell2_AP_100000000_610000000713	0.0496958	0.0389657	0.992176		tdT+_210127_Slice1_Cell1_AP_100000000_610000005618	0.281492	0.117533	1.24094			tdT-_210126_Slice1_Cell1_AP_100000000_610000002818	0.0107895	0.0177481	0.28035		tdT+_210126_Slice2_Cell2_AP_100000000_610000001447	0.105449	0.0299449	1.93595				tdT-_210207_Slice1_Cell1_AP	11.5854	2.75844	3.49402	5.33298			tdT-_210126_Slice4_Cell1_AP001	9.34757	2.81471	3.98936	1.51976
tdT-_210128_Slice2_Cell2_AP_100000000_610000000733	0.18995	0.0799478	1.92805		tdT+_210127_Slice1_Cell1_AP_100000000_610000005637	0.783514	0.386589	2.23483			tdT-_210126_Slice1_Cell1_AP_100000000_610000002828	0.0152848	0.031822	0.228611		tdT+_210126_Slice2_Cell2_AP_100000000_610000001485	0.121397	0.0421725	1.7344				tdT-_210207_Slice1_Cell1_AP001	14.4313	5.7301	2.75894	5.94233			tdT-_210126_Slice4_Cell1_AP002	14.7375	4.74924	3.24774	4.51262
tdT-_210128_Slice2_Cell2_AP_100000000_610000000770	0.320544	0.150531	1.9161		tdT+_210127_Slice1_Cell1_AP_100000000_610000006319	0.233734	0.079182	1.00013			tdT-_210126_Slice1_Cell1_AP_100000000_610000001766	0.0886038	0.0298711	1.7792		tdT+_210126_Slice2_Cell2_AP_100000000_610000001519	0.129911	0.0587558	2.16826				tdT-_210207_Slice2_Cell2_AP	5.81755	1.21199	0.969591	3.63597			tdT-_210126_Slice4_Cell1_AP003	10.2584	2.57864	2.25631	5.84593
tdT-_210128_Slice2_Cell2_AP_100000000_610000000803	0.24955	0.100353	1.38103		tdT+_210127_Slice1_Cell1_AP_100000000_610000006333	0.100448	0.0613063	0.629997			tdT-_210126_Slice1_Cell1_AP_100000000_610000001807	0.332022	0.116221	2.64164		tdT+_210126_Slice2_Cell2_AP_100000000_610000001562	0.114703	0.0268076	1.67387				tdT-_210207_Slice2_Cell2_AP001	10.2849	2.99976	1.28561	5.99952			tdT-_210129_Slice3_Cell1_AP	9.97689	2.5866	4.12441	5.54271
tdT-_210128_Slice2_Cell2_AP_100000000_610000000817	0.308804	0.122963	2.01027		tdT+_210127_Slice1_Cell1_AP_100000000_610000006348	0.31383	0.112877	1.2449			tdT-_210126_Slice1_Cell1_AP_100000000_610000001853	0.112716	0.0283408	1.69736		tdT+_210126_Slice2_Cell2_AP_100000000_610000001596	0.168535	0.120266	1.59612				tdT-_210207_Slice3_Cell1_AP	10.3082	3.96469	1.78411	4.55939			tdT-_210129_Slice3_Cell1_AP001	16.4977	6.3741	1.84757	5.99915
tdT-_210128_Slice2_Cell2_AP_100000000_610000000851	0.162411	0.0983936	1.45379		tdT+_210127_Slice1_Cell1_AP_100000000_610000006826	0.0994444	0.0838899	0.416172			tdT-_210126_Slice1_Cell1_AP_100000000_610000002695	0.00951265	0.0150907	0.192049		tdT+_210126_Slice2_Cell2_AP_100000000_610000001628	0.393779	0.197843	2.28922				tdT-_210207_Slice3_Cell1_AP002	8.99395	2.43586	2.99798	3.56011			tdT-_210129_Slice3_Cell1_AP002	22.789	6.53783	6.35103	6.27962
tdT-_210128_Slice2_Cell2_AP_100000000_610000000877	0.0977954	0.0630538	1.02599		tdT+_210127_Slice1_Cell1_AP_100000000_610000006833	0.110689	0.0915163	0.455961			tdT-_210126_Slice1_Cell1_AP_100000000_610000002701	0.066481	0.0423359	0.562348		tdT+_210126_Slice2_Cell2_AP_100000000_610000001670	0.277687	0.135906	2.4767				tdT-_210209_Slice1_Cell2_AP	14.675	5.45071	1.88678	7.3375			tdT-_210129_Slice3_Cell1_AP003	11.7743	3.92476	1.5699	9.90014
tdT-_210128_Slice2_Cell2_AP_100000000_610000000894	0.161351	0.0901951	1.16622		tdT+_210127_Slice1_Cell1_AP_100000000_610000006390	0.41921	0.135137	1.31724			tdT-_210126_Slice1_Cell1_AP_100000000_610000002717	0.0813016	0.0281287	0.689575		tdT+_210126_Slice2_Cell2_AP_100000000_610000001716	0.222894	0.126673	1.97038				tdT-_210209_Slice1_Cell2_AP002	8.25495	3.37702	3.0018	1.87612			tdT-_210205_Slice1_Cell1_AP	10.6026	3.1032	2.8446	4.6548
tdT-_210128_Slice2_Cell2_AP_100000000_610000000910	0.0457553	0.0208377	0.800966		tdT+_210127_Slice1_Cell1_AP_100000000_610000006410	0.0675415	0.0502009	0.501017			tdT-_210126_Slice1_Cell1_AP_100000000_610000002736	0.0754356	0.0661126	0.431303		tdT+_210126_Slice2_Cell2_AP_100000000_610000001752	0.0821862	0.030292	0.760557				tdT-_210209_Slice2_Cell1_AP	6.58483	1.6462	1.6462	3.29241			tdT-_210205_Slice1_Cell1_AP001	16.6264	3.21802	4.02253	9.38589
tdT-_210128_Slice2_Cell2_AP_100000000_610000000926	0.0283204	0.0145397	0.705573		tdT+_210127_Slice1_Cell1_AP_100000000_610000006423	0.167431	0.0855467	0.806108			tdT-_210126_Slice1_Cell1_AP_100000000_610000002747	0.0554982	0.0370686	0.558452		tdT+_210126_Slice2_Cell2_AP_100000000_610000001764	0.0966928	0.0384017	1.19082				tdT-_210209_Slice2_Cell1_AP002	13.1785	5.52648	1.27534	6.37671			tdT-_210205_Slice1_Cell1_AP002	14.9914	7.21105	2.27717	5.50317
tdT-_210128_Slice2_Cell2_AP_100000000_610000000936	0.0878856	0.0338077	0.829053		tdT+_210127_Slice1_Cell1_AP_100000000_610000006440	0.33338	0.153268	1.20922			tdT-_210126_Slice1_Cell1_AP_100000000_610000002762	0.037315	0.0208691	0.546867		tdT+_210126_Slice2_Cell2_AP_100000000_610000001788	0.127581	0.0342231	1.64919				tdT-_210209_Slice2_Cell1_AP003	18.2524	7.02014	2.34005	8.89218			tdT-_210205_Slice1_Cell1_AP003	11.838	3.17604	2.30985	6.35208
tdT-_210128_Slice2_Cell2_AP_100000000_610000000952	0.219204	0.097726	1.4961		tdT+_210127_Slice1_Cell1_AP_100000000_610000006463	0.219974	0.0796402	0.85977			tdT-_210126_Slice1_Cell1_AP_100000000_610000002774	0.0897192	0.0331055	0.786829		tdT+_210126_Slice2_Cell2_AP_100000000_610000001822	0.129052	0.0379981	1.18561				tdT-_210209_Slice2_Cell1_AP004	18.0343	4.93392	3.74297	9.35743			tdT-_210205_Slice2_Cell1_AP	14.99	5.71047	3.21214	6.06738
tdT-_210128_Slice2_Cell2_AP_100000000_610000000981	0.144166	0.0415077	0.896128		tdT+_210127_Slice1_Cell1_AP_100000000_610000006472	0.207828	0.105151	0.873863			tdT-_210126_Slice1_Cell1_AP_100000000_610000002791	0.0277423	0.0166448	0.649153		tdT+_210126_Slice2_Cell2_AP_100000000_610000001846	0.130463	0.0339326	1.87752				tdT-_210209_Slice2_Cell1_AP005	6.42722	3.78072	1.70132	0.94518			tdT-_210205_Slice2_Cell1_AP001	21.2487	7.86989	9.83737	3.54145
tdT-_210128_Slice2_Cell2_AP_100000000_610000000999	0.0939134	0.032568	0.789283		tdT+_210127_Slice1_Cell1_AP_100000000_610000006486	0.115513	0.0574638	0.81812			tdT-_210126_Slice1_Cell1_AP_100000000_610000001630	0.132955	0.0488826	1.81979		tdT+_210126_Slice2_Cell2_AP_100000000_610000001882	0.130601	0.0328746	2.01362				tdT-_210211_Slice1_Cell1_AP001	11.2523	2.61681	0.785044	7.85044			tdT-_210205_Slice2_Cell1_AP002	11.714	1.82218	3.90467	5.98717
tdT-_210128_Slice2_Cell2_AP_100000000_610000001017	0.130328	0.0341661	1.00575		tdT+_210127_Slice1_Cell1_AP_100000000_610000006503	0.190968	0.0519643	0.747127			tdT-_210126_Slice1_Cell1_AP_100000000_610000001667	0.202919	0.0325484	2.44026		tdT+_210126_Slice2_Cell2_AP_100000000_610000001921	0.17754	0.0615408	1.96589				tdT-_210211_Slice1_Cell1_AP002	16.5509	5.95088	6.32281	4.27719			tdT-_210205_Slice2_Cell1_AP003	11.3956	2.90951	4.12181	4.36427
tdT-_210128_Slice2_Cell2_AP_100000000_610000001037	0.262039	0.105785	1.44639		tdT+_210127_Slice1_Cell1_AP_100000000_610000006514	0.193795	0.124348	0.734579			tdT-_210126_Slice1_Cell1_AP_100000000_610000001719	0.106508	0.0307402	2.28218		tdT+_210126_Slice2_Cell2_AP_100000000_610000001960	0.0791176	0.0280755	1.10453				tdT-_210211_Slice1_Cell3_AP001	19.1303	4.72046	4.47202	9.93781			tdT-_210205_Slice2_Cell1_AP004	24.7428	11.3326	7.74393	5.66629
tdT-_210128_Slice2_Cell2_AP_100000000_610000001063	0.0383776	0.0180441	0.603513		tdT+_210127_Slice1_Cell1_AP_100000000_610000006519	0.119167	0.0553706	0.680293			tdT-_210126_Slice1_Cell1_AP_100000000_610000002324	0.12625	0.0479647	1.21424		tdT+_210126_Slice2_Cell2_AP_100000000_610000001982	0.321937	0.144825	2.38534				tdT-_210211_Slice1_Cell3_AP002	16.5002	4.25812	5.50007	6.74202			tdT-_210206_Slice1_Cell1_AP	11.9209	3.13708	3.34622	10.2494
tdT-_210128_Slice2_Cell2_AP_100000000_610000001076	0.203445	0.122175	1.09148		tdT+_210127_Slice1_Cell1_AP_100000000_610000006528	0.242648	0.0844687	0.780194			tdT-_210126_Slice1_Cell1_AP_100000000_610000002348	0.184373	0.0445183	1.03052		tdT+_210126_Slice2_Cell2_AP_100000000_610000002028	0.313166	0.177756	1.70356				tdT-_210211_Slice1_Cell3_AP003	15.954	4.16192	4.16192	7.63019			tdT-_210206_Slice1_Cell1_AP002	19.9707	9.17571	5.5774	5.43761
tdT-_210128_Slice2_Cell2_AP_100000000_610000001096	0.195346	0.112365	0.975834		tdT+_210127_Slice1_Cell1_AP_100000000_610000006538	0.288324	0.120431	0.967768			tdT-_210126_Slice1_Cell1_AP_100000000_610000002370	0.0631069	0.0309826	1.09157		tdT+_210126_Slice2_Cell2_AP_100000000_610000002059	0.268898	0.0729188	1.78368				tdT-_210211_Slice2_Cell1_AP	13.5167	2.70334	3.24401	7.56935			tdT-_210206_Slice1_Cell1_AP003	22.2965	5.3077	8.82572	6.2709
tdT-_210128_Slice2_Cell2_AP_100000000_610000001113	0.0814242	0.0438935	0.525985		tdT+_210127_Slice1_Cell1_AP_100000000_610000006551	0.258459	0.116002	0.77855			tdT-_210126_Slice1_Cell1_AP_100000000_610000002399	0.0642253	0.0315636	0.902567		tdT+_210126_Slice2_Cell2_AP_100000000_610000002095	0.249628	0.117328	2.15773				tdT-_210211_Slice2_Cell1_AP001	17.1449	6.67747	3.60944	6.85794			tdT-_210206_Slice1_Cell1_AP004	22.1459	7.19993	6.58887	5.21756
tdT-_210128_Slice2_Cell2_AP_100000000_610000001124	0.0483228	0.0346211	0.398675		tdT+_210127_Slice1_Cell1_AP_100000000_610000006557	0.348891	0.175283	1.20652			tdT-_210126_Slice1_Cell1_AP_100000000_610000002419	0.134119	0.0518893	1.09124		tdT+_210126_Slice2_Cell2_AP_100000000_610000002136	0.144479	0.0501043	1.53431				tdT-_210211_Slice2_Cell1_AP002	9.62773	5.59029	0.931715	3.10572			tdT-_210206_Slice2_Cell1_AP	11.018	5.76622	3.2136	5.04519
tdT-_210128_Slice2_Cell2_AP_100000000_610000001132	0.0617304	0.0625865	0.362141		tdT+_210127_Slice1_Cell1_AP_100000000_610000006581	0.324302	0.142308	1.00467			tdT-_210126_Slice1_Cell1_AP_100000000_610000002443	0.179737	0.0835697	1.60116		tdT+_210126_Slice2_Cell2_AP_100000000_610000002164	0.26719	0.123526	1.94079				tdT-_210212_Slice1_Cell2_AP	10.4053	3.68521	1.951	4.7691			tdT-_210206_Slice2_Cell1_AP001	9.52981	4.65666	2.42917	4.25174
tdT-_210128_Slice2_Cell2_AP_100000000_610000001138	0.0518223	0.0616763	0.311932		tdT+_210127_Slice1_Cell1_AP_100000000_610000006597	0.327603	0.164336	0.949902			tdT-_210126_Slice1_Cell1_AP_100000000_610000002478	0.0691414	0.0294773	1.17631		tdT+_210126_Slice2_Cell2_AP_100000000_610000002197	0.109235	0.037406	1.05656				tdT-_210212_Slice1_Cell2_AP001	10.4701	2.87414	2.46355	5.1324			tdT-_210206_Slice2_Cell1_AP002	12.3503	2.05545	9.29002	3.84415
tdT-_210128_Slice2_Cell2_AP001_100000000_610000000700	0.193394	0.109998	4.41991		tdT+_210127_Slice1_Cell1_AP_100000000_610000006612	0.202759	0.101071	0.707846			tdT-_210126_Slice1_Cell1_AP_100000000_610000002505	0.128801	0.0825872	0.851793		tdT+_210126_Slice2_Cell2_AP_100000000_610000002216	0.206158	0.0731676	1.90343				tdT-_210212_Slice1_Cell2_AP002	15.1564	4.02592	3.31546	7.81502			tdT-_210206_Slice2_Cell1_AP003	18.9004	2.29543	3.44188	5.50902
tdT-_210128_Slice2_Cell2_AP001_100000000_610000000836	0.351613	0.0566275	4.90355		tdT+_210127_Slice1_Cell1_AP_100000000_610000006617	0.191604	0.105182	0.844097			tdT-_210126_Slice1_Cell1_AP_100000000_610000002525	0.247807	0.121314	1.36603		tdT+_210126_Slice2_Cell2_AP_100000000_610000002251	0.0383852	0.0293673	0.79059				tdT-_210212_Slice1_Cell2_AP003#1	17.9705	7.3428	7.14957	3.47817			tdT-_210206_Slice3_Cell1_AP	5.62247	10.8474	12.5006	3.82851
tdT-_210128_Slice2_Cell2_AP001_100000000_610000000920	0.127974	0.0723465	1.87051		tdT+_210127_Slice1_Cell1_AP_100000000_610000006635	0.0893647	0.0605589	0.53581			tdT-_210126_Slice1_Cell1_AP_100000000_610000002555	0.0246946	0.0274951	0.425156		tdT+_210126_Slice2_Cell2_AP_100000000_610000002267	0.211462	0.095733	1.72612				tdT-_210212_Slice2_Cell2_AP001	14.9891	5.59834	2.1671	7.22366			tdT-_210206_Slice3_Cell1_AP001	22.971	9.10997	8.2951	6.78782
tdT-_210128_Slice2_Cell2_AP001_100000000_610000000953	0.163213	0.0239099	2.39167		tdT+_210127_Slice1_Cell1_AP_100000000_610000005945	0.060072	0.0512063	0.696422			tdT-_210126_Slice1_Cell1_AP_100000000_610000002569	0.116242	0.0871128	0.543884		tdT+_210126_Slice2_Cell2_AP_100000000_610000002297	0.0988516	0.0235732	1.32853				tdT-_210212_Slice2_Cell2_AP002	12.9414	4.19229	2.00501	6.74412			tdT-_210206_Slice3_Cell1_AP002	22.8642	7.11574	6.96645	0.576952
tdT-_210128_Slice2_Cell2_AP001_100000000_610000000998	0.0594667	0.0303898	1.53606		tdT+_210127_Slice1_Cell1_AP_100000000_610000005963	0.234865	0.129198	0.923873			tdT-_210126_Slice1_Cell1_AP_100000000_610000002147	0.0320936	0.0203467	0.706958		tdT+_210126_Slice2_Cell2_AP_100000000_610000002324	0.636761	0.172286	2.53157				tdT-_210212_Slice2_Cell2_AP004	15.053	5.40364	1.92987	7.71949			tdT-_210206_Slice3_Cell1_AP004	20.1933	5.88036	7.71798	11.0257
tdT-_210128_Slice2_Cell2_AP001_100000000_610000001030	0.247261	0.0630545	2.46714		tdT+_210127_Slice1_Cell1_AP_100000000_610000005984	0.421459	0.233914	1.88999			tdT-_210126_Slice1_Cell1_AP_100000000_610000002222	0.271682	0.125988	2.42863		tdT+_210126_Slice2_Cell2_AP_100000000_610000002372	0.0911613	0.0270351	1.15779				tdT-_210212_Slice2_Cell2_AP005	20.2396	13.555	3.71369	2.97095			tdT-_210206_Slice3_Cell1_AP005	24.6241	1.77552	0.887758	2.95919
tdT-_210128_Slice2_Cell2_AP001_100000000_610000001076	0.22266	0.0549566	2.58437		tdT+_210127_Slice1_Cell1_AP_100000000_610000006022	0.183661	0.0966127	1.02785			tdT-_210126_Slice1_Cell1_AP_100000000_610000002641	0.0382978	0.0265087	0.459631		tdT+_210126_Slice2_Cell2_AP_100000000_610000002394	0.564501	0.234748	2.12958			average		13.9536	4.7563	3.34844	5.84282			tdT-_210210_Slice1_Cell1_AP	18.145	5.32515	5.32515	7.49466
tdT-_210128_Slice2_Cell2_AP001_100000000_610000001126	0.251395	0.0815658	2.71494		tdT+_210127_Slice1_Cell1_AP_100000000_610000006043	0.436099	0.2377	1.49108			tdT-_210126_Slice1_Cell1_AP_100000000_610000002656	0.0284892	0.0178411	0.418265		tdT+_210126_Slice2_Cell2_AP_100000000_610000002433	0.178525	0.109469	0.970923			sem		0.585976	0.335954	0.293721	0.379909			tdT-_210210_Slice1_Cell1_AP002	9.37066	6.45535	1.6659	1.24942
tdT-_210128_Slice2_Cell2_AP001_100000000_610000001176	0.208639	0.114946	2.35633		tdT+_210127_Slice1_Cell1_AP_100000000_610000006071	0.039058	0.0341225	0.703346			tdT-_210126_Slice1_Cell1_AP_100000000_610000002665	0.0567617	0.021573	0.92602		tdT+_210126_Slice2_Cell2_AP_100000000_610000002450	0.0972742	0.0299677	1.06385											tdT-_210210_Slice1_Cell1_AP003	16.228	5.9011	5.53228	4.79464
tdT-_210128_Slice2_Cell2_AP001_100000000_610000001220	0.125025	0.0835296	1.11572		tdT+_210127_Slice1_Cell1_AP_100000000_610000006088	0.215364	0.0389069	1.07367			tdT-_210126_Slice1_Cell1_AP_100000000_610000002685	0.0475193	0.0565851	0.347299		tdT+_210126_Slice2_Cell2_AP_100000000_610000002472	0.384227	0.0584557	1.72265											tdT-_210210_Slice1_Cell2_AP	9.84345	2.00887	2.20975	5.62483
tdT-_210128_Slice2_Cell2_AP001_100000000_610000001231	0.0567389	0.0230611	1.29503		tdT+_210127_Slice1_Cell1_AP_100000000_610000006110	0.271403	0.18984	0.987849			tdT-_210126_Slice1_Cell1_AP_100000000_610000001509	0.0951667	0.0348712	1.65396		tdT+_210126_Slice2_Cell2_AP_100000000_610000002536	0.0348311	0.0213788	0.499277			Group	Dendrite	Overall	Stubby	Thin	Mushroom			tdT-_210210_Slice1_Cell2_AP001	14.0701	6.17712	3.43173	4.46125
tdT-_210128_Slice2_Cell2_AP001_100000000_610000001256	0.0526571	0.0195498	1.12235		tdT+_210127_Slice1_Cell1_AP_100000000_610000006127	0.348025	0.174347	1.54435			tdT-_210126_Slice1_Cell1_AP_100000000_610000001547	0.153303	0.0465204	2.15572		tdT+_210126_Slice2_Cell2_AP_100000000_610000002545	0.068582	0.0463913	0.553322			tdTom+	tdT+_210127_Slice1_Cell1_AP	23.6532	6.51859	7.63606	9.49852			tdT-_210210_Slice1_Cell2_AP003	16.5241	5.50802	3.87602	7.14003
tdT-_210128_Slice2_Cell2_AP001_100000000_610000001375	0.0335924	0.017233	0.990237		tdT+_210127_Slice1_Cell1_AP_100000000_610000006157	0.23141	0.120899	0.981645			tdT-_210126_Slice1_Cell1_AP_100000000_610000001589	0.141095	0.0808834	1.79977		tdT+_210126_Slice2_Cell2_AP_100000000_610000002551	0.0991662	0.0359829	0.693239				tdT+_210127_Slice1_Cell1_AP002	23.2275	7.03218	7.88457	8.31076			tdT-_210210_Slice1_Cell2_AP004	18.8692	6.45527	3.22763	9.18634
tdT-_210128_Slice2_Cell2_AP001_100000000_610000001394	0.0670353	0.040167	1.07821		tdT+_210127_Slice1_Cell1_AP_100000000_610000006172	0.338883	0.152803	1.40247			tdT-_210126_Slice1_Cell1_AP_100000000_610000001440	0.254954	0.129924	4.05663		tdT+_210126_Slice2_Cell2_AP_100000000_610000002562	0.0793791	0.0331864	0.668971				tdT+_210127_Slice1_Cell1_AP003	33.2341	12.871	15.1763	5.18682			tdT-_210210_Slice1_Cell2_AP005	17.381	7.72492	9.33427	0.321871
tdT-_210128_Slice2_Cell2_AP001_100000000_610000001414	0.133906	0.0739391	1.27901		tdT+_210127_Slice1_Cell1_AP_100000000_610000006196	0.401586	0.169167	1.33599			tdT-_210126_Slice1_Cell1_AP_100000000_610000002625	0.116962	0.0634106	0.736911		tdT+_210126_Slice2_Cell2_AP_100000000_610000002573	0.197617	0.0743794	1.11902				tdT+_210127_Slice1_Cell2_AP	21.5916	9.38766	9.38766	2.8163			tdT-_210210_Slice2_Cell2_AP	6.93662	2.39194	1.91355	2.63113
tdT-_210128_Slice2_Cell2_AP001_100000000_610000001434	0.149713	0.0613533	1.42585		tdT+_210127_Slice1_Cell1_AP_100000000_610000006223	0.189124	0.0465918	0.929687			tdT-_210126_Slice1_Cell1_AP_100000000_610000002583	0.07191	0.0317074	0.925531		tdT+_210126_Slice2_Cell2_AP_100000000_610000002595	0.104839	0.0555914	0.527579				tdT+_210127_Slice1_Cell2_AP001	16.2145	5.40484	4.13311	6.67656			tdT-_210210_Slice2_Cell2_AP001	13.3591	3.72813	4.03881	5.5922
tdT-_210128_Slice2_Cell2_AP001_100000000_610000001458	0.183281	0.105152	1.34291		tdT+_210127_Slice1_Cell1_AP_100000000_610000006235	0.458908	0.106746	1.39781			tdT-_210126_Slice1_Cell1_AP001_100000000_610000000748	0.304386	0.111516	2.23987		tdT+_210126_Slice2_Cell2_AP_100000000_610000002602	0.0746016	0.0171227	0.624669				tdT+_210127_Slice1_Cell2_AP002	17.9119	6.36867	7.56279	3.98042			tdT-_210210_Slice2_Cell2_AP003	22.1274	7.82089	7.24863	7.05788
tdT-_210128_Slice2_Cell2_AP001_100000000_610000001483	0.137373	0.0525871	1.18166		tdT+_210127_Slice1_Cell1_AP_100000000_610000006262	0.0941232	0.0802619	0.530554			tdT-_210126_Slice1_Cell1_AP001_100000000_610000000790	0.238475	0.0756435	2.32747		tdT+_210126_Slice2_Cell2_AP_100000000_610000002613	0.0482722	0.0186364	0.594487				tdT+_210127_Slice1_Cell2_AP003	19.7212	4.83362	7.92713	6.96041			tdT-_210210_Slice2_Cell2_AP004	28.9992	10.4295	10.4295	8.14013
tdT-_210128_Slice2_Cell2_AP001_100000000_610000001504	0.074492	0.034415	1.21762		tdT+_210127_Slice1_Cell1_AP_100000000_610000006274	0.287852	0.112984	1.1789			tdT-_210126_Slice1_Cell1_AP001_100000000_610000000712	0.171046	0.0880201	1.79948		tdT+_210126_Slice2_Cell2_AP_100000000_610000002625	0.302145	0.130277	1.1687				tdT+_210128_Slice1_Cell1_AP	13.8376	4.61254	2.12886	7.09621			tdT-_210210_Slice2_Cell2_AP005	31.5272	12.5734	16.1389	2.81493
tdT-_210128_Slice2_Cell2_AP001_100000000_610000001609	0.11437	0.0649177	1.36172		tdT+_210127_Slice1_Cell1_AP_100000000_610000006292	0.149598	0.0573968	0.777564			tdT-_210126_Slice1_Cell1_AP001_100000000_610000000499	0.150051	0.0961501	2.52385		tdT+_210126_Slice2_Cell2_AP_100000000_610000002647	0.056871	0.0227717	0.545642				tdT+_210128_Slice1_Cell1_AP003	23.4096	8.04146	5.89707	9.47105			tdT-_210210_Slice3_Cell1_AP	13.1952	5.13145	2.44355	5.62016
tdT-_210128_Slice2_Cell2_AP001_100000000_610000001631	0.158758	0.0759087	1.47435		tdT+_210127_Slice1_Cell1_AP_100000000_610000006306	0.170306	0.106449	0.801004			tdT-_210126_Slice1_Cell1_AP001_100000000_610000000547	0.154813	0.0375242	2.02542		tdT+_210126_Slice2_Cell2_AP_100000000_610000002659	0.116472	0.0272878	0.911993				tdT+_210128_Slice1_Cell2_AP	17.1923	5.55445	3.43847	8.19943			tdT-_210210_Slice3_Cell1_AP001	13.4292	6.33089	3.26137	3.45321
tdT-_210128_Slice2_Cell2_AP001_100000000_610000001659	0.090582	0.0425222	1.46023		tdT+_210127_Slice1_Cell1_AP_100000000_610000005265	0.407135	0.136254	1.48851			tdT-_210126_Slice1_Cell1_AP001_100000000_610000000586	0.369494	0.186506	3.18371		tdT+_210126_Slice2_Cell2_AP_100000000_610000002677	0.102914	0.0518868	0.678883				tdT+_210128_Slice1_Cell2_AP001	19.4649	5.22937	5.22937	9.00613			tdT-_210210_Slice3_Cell1_AP002#2	22.242	6.42546	4.94267	10.8739
tdT-_210128_Slice2_Cell2_AP001_100000000_610000001688	0.0515075	0.0257636	0.955084		tdT+_210127_Slice1_Cell1_AP_100000000_610000005286	0.449532	0.189534	2.04017			tdT-_210126_Slice1_Cell1_AP001_100000000_610000000647	0.407853	0.200724	3.3121		tdT+_210126_Slice2_Cell2_AP_100000000_610000002691	0.064533	0.0604992	0.389603				tdT+_210128_Slice1_Cell2_AP002	21.8071	9.05201	5.9661	6.78901			tdT-_210210_Slice4_Cell2_AP	15.7788	2.39073	6.69405	6.69405
tdT-_210128_Slice2_Cell2_AP001_100000000_610000001779	0.234282	0.143206	1.63408		tdT+_210127_Slice1_Cell1_AP_100000000_610000005323	0.434687	0.192433	2.1087			tdT-_210126_Slice1_Cell1_AP001_100000000_610000001112	0.168842	0.0479555	0.849228		tdT+_210126_Slice2_Cell2_AP_100000000_610000002697	0.0442281	0.0196441	0.490733				tdT+_210128_Slice1_Cell2_AP004	10.381	4.52988	4.90737	0.943726			tdT-_210210_Slice4_Cell2_AP#2	20.1239	6.01404	5.78273	8.32713
tdT-_210128_Slice2_Cell2_AP001_100000000_610000001811	0.0739239	0.0444921	1.14447		tdT+_210127_Slice1_Cell1_AP_100000000_610000006843	0.113189	0.136462	0.416147			tdT-_210126_Slice1_Cell1_AP001_100000000_610000001127	0.228852	0.122618	0.868925		tdT+_210126_Slice2_Cell2_AP_100000000_610000002706	0.0762234	0.0318808	0.740045				tdT+_210128_Slice1_Cell3_AP	9.98794	3.08718	1.81599	5.08477			tdT-_210210_Slice4_Cell2_AP001	25.2632	6.83592	7.13313	11.2941
tdT-_210128_Slice2_Cell2_AP001_100000000_610000001834	0.186186	0.0444714	1.17207		tdT+_210127_Slice1_Cell1_AP_100000000_610000006853	0.180923	0.206614	0.498023			tdT-_210126_Slice1_Cell1_AP001_100000000_610000001144	0.246269	0.101014	1.13787		tdT+_210126_Slice2_Cell2_AP_100000000_610000002720	0.128584	0.0339046	0.729382				tdT+_210128_Slice1_Cell3_AP001	15.4332	5.25746	3.05272	7.12301			tdT-_210210_Slice4_Cell2_AP002	35.8771	12.4626	17.5609	5.85363
tdT-_210128_Slice2_Cell2_AP001_100000000_610000001858	0.0529035	0.0286397	0.854128		tdT+_210127_Slice1_Cell1_AP_100000000_610000006869	0.0847065	0.104798	0.376557			tdT-_210126_Slice1_Cell1_AP001_100000000_610000000835	0.441432	0.201317	2.41984		tdT+_210126_Slice2_Cell2_AP_100000000_610000002732	0.0281786	0.0150258	0.404872				tdT+_210128_Slice1_Cell3_AP002	12.852	4.76769	2.07291	6.01143		average		15.9465	5.24705	5.16549	5.5277
tdT-_210128_Slice2_Cell2_AP001_100000000_610000001874	0.321149	0.118809	2.26804		tdT+_210127_Slice1_Cell1_AP_100000000_610000004011	0.256677	0.147892	2.0762			tdT-_210126_Slice1_Cell1_AP001_100000000_610000000879	0.328268	0.160806	2.02979		tdT+_210126_Slice2_Cell2_AP_100000000_610000002739	0.0627326	0.0293365	0.572242				tdT+_210128_Slice1_Cell3_AP003	19.4043	6.4681	5.82129	7.11491		sem		0.794794	0.34669	0.420153	0.325731
tdT-_210128_Slice2_Cell2_AP001_100000000_610000001914	0.0409924	0.0210814	0.730216		tdT+_210127_Slice1_Cell1_AP_100000000_610000004051	0.22797	0.172102	2.09483			tdT-_210126_Slice1_Cell1_AP001_100000000_610000000917	0.106592	0.0452192	1.12695		tdT+_210126_Slice2_Cell2_AP_100000000_610000002751	0.0570094	0.0208955	0.618188				tdT+_210128_Slice1_Cell3_AP004	23.7224	14.613	7.02185	2.08758
tdT-_210128_Slice2_Cell2_AP001_100000000_610000001929	0.0578953	0.0308261	0.956095		tdT+_210127_Slice1_Cell1_AP_100000000_610000004091	0.520178	0.247324	2.96227			tdT-_210126_Slice1_Cell1_AP001_100000000_610000000940	0.251326	0.104811	2.06013		tdT+_210126_Slice2_Cell2_AP_100000000_610000002764	0.0346335	0.0197728	0.578429				tdT+_210128_Slice2_Cell1_AP	13.8945	3.65644	4.38773	5.85031
tdT-_210128_Slice2_Cell2_AP001_100000000_610000001947	0.0587967	0.0246395	0.894448		tdT+_210127_Slice1_Cell1_AP_100000000_610000004138	0.205865	0.136153	1.8767			tdT-_210126_Slice1_Cell1_AP001_100000000_610000001220	0.152228	0.0765262	0.84139		tdT+_210126_Slice2_Cell2_AP_100000000_610000002776	0.0668681	0.0490027	0.492746				tdT+_210128_Slice2_Cell1_AP001	17.7123	4.42806	4.42806	8.85613		3US		Panel m	Panel n	Panel o	Panel p
tdT-_210128_Slice2_Cell2_AP001_100000000_610000001965	0.0954561	0.0402137	0.827048		tdT+_210127_Slice1_Cell1_AP_100000000_610000004173	0.408	0.109446	2.26316			tdT-_210126_Slice1_Cell1_AP001_100000000_610000000981	0.173457	0.0697773	1.2492		tdT+_210126_Slice2_Cell2_AP_100000000_610000002788	0.0515425	0.0377381	0.492238				tdT+_210128_Slice2_Cell1_AP004	13.5024	5.91885	5.36395	2.21957
tdT-_210128_Slice2_Cell2_AP001_100000000_610000001974	0.197767	0.0715232	1.72108		tdT+_210127_Slice1_Cell1_AP_100000000_610000004206	0.156156	0.0785477	1.63029			tdT-_210126_Slice1_Cell1_AP001_100000000_610000001005	0.21112	0.0404697	1.61246		tdT+_210126_Slice2_Cell2_AP_100000000_610000002796	0.0525725	0.0450442	0.354387				tdT+_210128_Slice2_Cell3_AP002	12.6155	3.20096	3.95412	5.46046
tdT-_210128_Slice2_Cell2_AP001_100000000_610000002005	0.114543	0.063679	0.622246		tdT+_210127_Slice1_Cell1_AP_100000000_610000004243	0.240462	0.0861029	1.83917			tdT-_210126_Slice1_Cell1_AP001_100000000_610000001036	0.182448	0.0650426	1.39919		tdT+_210126_Slice2_Cell2_AP_100000000_610000002803	0.0291744	0.0152683	0.334368				tdT+_210128_Slice2_Cell3_AP003	18.0335	6.4541	7.2134	4.36601		Group	Dendrite	Overall	Stubby	Thin	Mushroom
tdT-_210128_Slice2_Cell2_AP001_100000000_610000002011	0.0958937	0.0481403	0.883344		tdT+_210127_Slice1_Cell1_AP_100000000_610000004277	0.11136	0.0358661	1.43616			tdT-_210126_Slice1_Cell1_AP001_100000000_610000001065	0.354743	0.151698	1.54415		tdT+_210126_Slice2_Cell2_AP_100000000_610000002810	0.0200252	0.0160439	0.359387				tdT+_210204_Slice2_Cell2_AP	22.3429	9.04358	4.61045	8.68893		tdTom+	tdT+_210126_Slice2_Cell2_AP	14.3117	3.30271	5.87148	5.13755
tdT-_210128_Slice2_Cell2_AP001_100000000_610000002023	0.195849	0.114561	1.21263		tdT+_210127_Slice1_Cell1_AP_100000000_610000004304	0.157795	0.127494	1.5078			tdT-_210126_Slice1_Cell1_AP001_100000000_610000001094	0.158453	0.0625691	0.957118		tdT+_210126_Slice2_Cell2_AP_100000000_610000002819	0.103453	0.0864834	0.543973				tdT+_210204_Slice2_Cell2_AP001	24.2475	9.53999	5.36625	9.34124			tdT+_210126_Slice2_Cell2_AP001	13.6681	4.06347	3.69406	5.9105
tdT-_210128_Slice2_Cell2_AP001_100000000_610000002046	0.111539	0.0455109	1.02401		tdT+_210127_Slice1_Cell1_AP_100000000_610000004336	0.179509	0.111983	1.43706			tdT-_210126_Slice1_Cell1_AP001_100000000_610000001186	0.0718296	0.0279991	0.597055		tdT+_210126_Slice2_Cell2_AP_100000000_610000002827	0.0683105	0.0742453	0.351035				tdT+_210204_Slice2_Cell2_AP002	24.9278	7.32006	4.94599	12.4639			tdT+_210126_Slice2_Cell2_AP003	22.5468	7.09806	11.6909	3.7578
tdT-_210128_Slice2_Cell2_AP001_100000000_610000002068	0.0701594	0.0190588	0.7996		tdT+_210127_Slice1_Cell1_AP_100000000_610000004362	0.0713057	0.0621829	1.02843			tdT-_210126_Slice1_Cell1_AP001_100000000_610000001199	0.139651	0.0643704	0.725027		tdT+_210126_Slice2_Cell2_AP_100000000_610000002836	0.0177495	0.0164304	0.262678				tdT+_210207_Slice1_Cell2_AP	13.493	5.50737	2.75368	5.232			tdT+_210126_Slice4_Cell2_AP	11.3123	3.20158	3.8419	4.26878
tdT-_210128_Slice2_Cell2_AP001_100000000_610000002084	0.0549499	0.0176847	0.859109		tdT+_210127_Slice1_Cell1_AP_100000000_610000004384	0.395229	0.151622	2.78163			tdT-_210126_Slice1_Cell1_AP001_100000000_610000001210	0.15144	0.0935921	0.559515		tdT+_210126_Slice2_Cell2_AP_100000000_610000002842	0.108659	0.0819999	0.525716				tdT+_210207_Slice1_Cell2_AP001	17.1801	5.59353	4.79446	6.79215			tdT+_210126_Slice4_Cell2_AP001	10.0831	2.20568	3.46606	4.41135
tdT-_210128_Slice2_Cell2_AP001_100000000_610000002100	0.0598976	0.0222034	0.904567		tdT+_210127_Slice1_Cell1_AP_100000000_610000004433	0.410509	0.140181	2.47212			tdT-_210126_Slice1_Cell1_AP001_100000000_610000001166	0.206579	0.0751871	1.09849		tdT+_210126_Slice2_Cell2_AP_100000000_610000002860	0.0509725	0.0568526	0.314392				tdT+_210207_Slice1_Cell3_AP	21.8577	9.0321	5.41926	7.40632			tdT+_210126_Slice4_Cell2_AP004	9.42943	3.27143	4.42606	1.73193
tdT-_210128_Slice2_Cell2_AP001_100000000_610000002119	0.0680804	0.0252484	0.878838		tdT+_210127_Slice1_Cell1_AP_100000000_610000004480	0.663156	0.310036	3.17287			tdT-_210126_Slice1_Cell1_AP001_100000000_610000001236	0.072337	0.0910409	0.337893		tdT+_210126_Slice2_Cell2_AP_100000000_610000002871	0.0909437	0.0729193	0.505538				tdT+_210207_Slice1_Cell3_AP001	12.463	4.67363	1.75261	5.84203			tdT+_210129_Slice1_Cell1_AP	19.2401	7.32958	4.94747	6.9631
tdT-_210128_Slice2_Cell2_AP001_100000000_610000002137	0.0507112	0.0340392	0.429833		tdT+_210127_Slice1_Cell1_AP_100000000_610000004540	0.413454	0.235587	2.13773			tdT-_210126_Slice1_Cell1_AP001#2_100000000_610000000858	0.38866	0.126719	3.31267		tdT+_210126_Slice2_Cell2_AP_100000000_610000002880	0.0675644	0.0789895	0.343266				tdT+_210207_Slice1_Cell3_AP002	24.556	7.55568	7.7274	9.27289			tdT+_210129_Slice1_Cell1_AP001	23.1035	7.55307	7.55307	7.99737
tdT-_210128_Slice2_Cell2_AP001_100000000_610000002142	0.0574121	0.0217277	0.710454		tdT+_210127_Slice1_Cell1_AP_100000000_610000004584	0.225194	0.0801003	1.67316			tdT-_210126_Slice1_Cell1_AP001#2_100000000_610000000918	0.256678	0.130712	2.27		tdT+_210126_Slice2_Cell2_AP_100000000_610000002886	0.0721383	0.0664216	0.34144				tdT+_210207_Slice2_Cell1_AP	13.1286	3.68522	3.68522	5.75815			tdT+_210129_Slice1_Cell1_AP002	17.7479	3.91056	6.31706	7.52031
tdT-_210128_Slice2_Cell2_AP001_100000000_610000002157	0.0862195	0.061641	0.846065		tdT+_210127_Slice1_Cell1_AP_100000000_610000004614	0.0782536	0.0421198	1.02294			tdT-_210126_Slice1_Cell1_AP001#2_100000000_610000001162	0.280588	0.0887678	2.22915		tdT+_210126_Slice2_Cell2_AP001_100000000_610000000743	0.0910405	0.029484	2.54439				tdT+_210207_Slice2_Cell1_AP001	17.7811	6.33784	5.28153	6.16179			tdT+_210129_Slice1_Cell1_AP003	17.8978	4.01158	5.86308	8.02316
tdT-_210128_Slice2_Cell2_AP001_100000000_610000002174	0.0553922	0.0177936	0.721103		tdT+_210127_Slice1_Cell1_AP_100000000_610000004637	0.0849025	0.0561341	0.925151			tdT-_210126_Slice1_Cell1_AP001#2_100000000_610000000812	0.276675	0.189259	2.31826		tdT+_210126_Slice2_Cell2_AP001_100000000_610000000861	0.0369631	0.0211086	1.67864				tdT+_210207_Slice3_Cell2_AP	11.6029	6.12374	1.93381	3.54532			tdT+_210129_Slice1_Cell2_AP	9.59335	3.73075	2.9313	2.9313
tdT-_210128_Slice2_Cell2_AP001_100000000_610000002189	0.19684	0.0968144	1.07333		tdT+_210127_Slice1_Cell1_AP_100000000_610000004656	0.144103	0.106174	1.0405			tdT-_210126_Slice1_Cell1_AP001#2_100000000_610000001677	0.152107	0.0520488	1.0764		tdT+_210126_Slice2_Cell2_AP001_100000000_610000000968	0.317108	0.121347	3.19457				tdT+_210207_Slice3_Cell2_AP001	22.2655	5.84014	7.66518	8.76021			tdT+_210129_Slice1_Cell2_AP001	23.3962	9.17499	9.17499	5.04624
tdT-_210128_Slice2_Cell2_AP001_100000000_610000002208	0.171807	0.0713355	1.0637		tdT+_210127_Slice1_Cell1_AP_100000000_610000004677	0.269635	0.172653	1.79504			tdT-_210126_Slice1_Cell1_AP001#2_100000000_610000001696	0.155132	0.0897629	1.74918		tdT+_210126_Slice2_Cell2_AP001_100000000_610000001677	0.0563048	0.0202001	1.49222				tdT+_210207_Slice3_Cell2_AP002	13.5487	2.70974	4.81732	6.02165			tdT+_210129_Slice1_Cell2_AP002	12.8923	3.77335	4.71668	4.40224
tdT-_210128_Slice2_Cell2_AP001_100000000_610000002226	0.134492	0.0611091	0.941521		tdT+_210127_Slice1_Cell1_AP_100000000_610000004714	0.495487	0.286398	2.025			tdT-_210126_Slice1_Cell1_AP001#2_100000000_610000001731	0.160502	0.0540026	1.40469		tdT+_210126_Slice2_Cell2_AP001_100000000_610000001690	0.630535	0.133649	4.15516				tdT+_210207_Slice3_Cell2_AP003	10.1084	5.24139	2.6207	2.24631			tdT+_210129_Slice1_Cell2_AP004	16.6769	5.80067	4.10881	6.76745
tdT-_210128_Slice2_Cell2_AP001_100000000_610000002240	0.140895	0.0334995	1.00258		tdT+_210127_Slice1_Cell1_AP_100000000_610000004753	0.467252	0.251996	2.24431			tdT-_210126_Slice1_Cell1_AP001#2_100000000_610000001757	0.0815674	0.0638965	0.800302		tdT+_210126_Slice2_Cell2_AP001_100000000_610000001773	0.117261	0.100903	1.67879				tdT+_210207_Slice3_Cell3_AP	10.2263	3.40876	3.09887	3.71865			tdT+_210129_Slice1_Cell2_AP006	31.1141	13.2523	17.2856	0.576186
tdT-_210128_Slice2_Cell2_AP001_100000000_610000002257	0.106304	0.0334909	0.563562		tdT+_210127_Slice1_Cell1_AP_100000000_610000004798	0.394827	0.184646	2.40604			tdT-_210126_Slice1_Cell1_AP001#2_100000000_610000001775	0.339119	0.156035	1.92817		tdT+_210126_Slice2_Cell2_AP001_100000000_610000001810	0.292309	0.0371765	2.26677				tdT+_210207_Slice3_Cell3_AP#2	19.792	5.82117	8.9258	5.04502			tdT+_210129_Slice2_Cell1_AP	19.0082	6.92822	4.61881	7.46116
tdT-_210128_Slice2_Cell2_AP001_100000000_610000002268	0.0388131	0.0207701	0.424144		tdT+_210127_Slice1_Cell1_AP_100000000_610000004843	0.307389	0.1654	1.82083			tdT-_210126_Slice1_Cell1_AP001#2_100000000_610000001813	0.249937	0.121943	1.51977		tdT+_210126_Slice2_Cell2_AP001_100000000_610000001858	0.175682	0.121369	1.82653				tdT+_210207_Slice3_Cell3_AP001	23.6344	5.05008	7.67612	10.9082			tdT+_210129_Slice2_Cell1_AP001	21.5558	6.30093	5.9693	9.28557
tdT-_210128_Slice2_Cell2_AP001_100000000_610000002277	0.154734	0.0979815	0.58766		tdT+_210127_Slice1_Cell1_AP_100000000_610000004877	0.355093	0.185726	1.98199			tdT-_210126_Slice1_Cell1_AP001#2_100000000_610000001865	0.151719	0.0677384	1.18658		tdT+_210126_Slice2_Cell2_AP001_100000000_610000001892	0.259105	0.106803	2.70302				tdT+_210207_Slice3_Cell3_AP002	18.2694	7.98179	6.03069	4.25696			tdT+_210129_Slice2_Cell1_AP002	16.0132	6.18693	5.45905	4.36724
tdT-_210128_Slice2_Cell2_AP001_100000000_610000002288	0.0954771	0.0660373	0.492548		tdT+_210127_Slice1_Cell1_AP_100000000_610000004914	0.441164	0.261729	2.19458			tdT-_210126_Slice1_Cell1_AP001#2_100000000_610000001890	0.25246	0.157422	1.30112		tdT+_210126_Slice2_Cell2_AP001_100000000_610000001936	0.0668049	0.0175805	1.29234				tdT+_210209_Slice1_Cell1_AP001	13.7466	3.10407	3.32579	7.31673			tdT+_210129_Slice2_Cell1_AP003	30.3671	10.0614	10.0614	10.2443
tdT-_210128_Slice2_Cell2_AP001_100000000_610000002293	0.0585703	0.0327015	0.567046		tdT+_210127_Slice1_Cell1_AP_100000000_610000004959	0.178025	0.09645	1.43806			tdT-_210126_Slice1_Cell1_AP001#2_100000000_610000001950	0.208665	0.117126	1.50951		tdT+_210126_Slice2_Cell2_AP001_100000000_610000002004	0.470624	0.327389	2.01732				tdT+_210209_Slice1_Cell1_AP002	13.5961	6.44026	2.14675	5.00909			tdT+_210129_Slice2_Cell1_AP004	6.68375	3.44967	1.94044	1.29363
tdT-_210128_Slice2_Cell2_AP001_100000000_610000002305	0.0457527	0.0349822	0.368197		tdT+_210127_Slice1_Cell1_AP_100000000_610000004989	0.318269	0.066085	1.77297			tdT-_210126_Slice1_Cell1_AP001#2_100000000_610000002044	0.268351	0.133442	1.68476		tdT+_210126_Slice2_Cell2_AP001_100000000_610000002077	0.286942	0.241847	1.69198				tdT+_210209_Slice1_Cell1_AP003	18.5033	5.44214	4.71652	8.34461			tdT+_210129_Slice3_Cell2_AP	10.4467	2.61167	2.37424	5.46076
tdT-_210128_Slice2_Cell2_AP001_100000000_610000002313	0.10297	0.0874941	0.44753		tdT+_210127_Slice1_Cell1_AP_100000000_610000005021	0.133084	0.110072	1.17104			tdT-_210126_Slice1_Cell1_AP001#2_100000000_610000002105	0.267603	0.051881	1.27244		tdT+_210126_Slice2_Cell2_AP001_100000000_610000002109	0.120349	0.076447	1.52735				tdT+_210209_Slice1_Cell1_AP004	17.6025	9.46371	4.92113	3.21766			tdT+_210129_Slice3_Cell2_AP001	14.9173	5.67276	4.83235	4.41214
tdT-_210128_Slice2_Cell2_AP001_100000000_610000002320	0.0417207	0.0363527	0.343316		tdT+_210127_Slice1_Cell1_AP_100000000_610000005046	0.387105	0.125585	1.83223			tdT-_210126_Slice1_Cell1_AP001#2_100000000_610000002126	0.061529	0.0443495	0.451708		tdT+_210126_Slice2_Cell2_AP001_100000000_610000002168	0.124954	0.106265	1.3256				tdT+_210209_Slice2_Cell2_AP	13.2062	3.23418	0.808545	9.16351			tdT+_210129_Slice3_Cell2_AP002	17.2652	6.79589	7.16323	3.30611
tdT-_210128_Slice2_Cell2_AP001_100000000_610000002325	0.0584713	0.0686073	0.37286		tdT+_210127_Slice1_Cell1_AP_100000000_610000005076	0.792046	0.325389	2.62252			tdT-_210126_Slice1_Cell1_AP001#2_100000000_610000001652	0.148243	0.06328	1.32715		tdT+_210126_Slice2_Cell2_AP001_100000000_610000002195	0.771756	0.116618	2.67098				tdT+_210209_Slice2_Cell2_AP001	13.0666	2.84057	2.27246	7.9536			tdT+_210129_Slice3_Cell2_AP003	20.4001	10.486	8.57947	1.33458
tdT-_210128_Slice2_Cell2_AP001_100000000_610000002331	0.0759646	0.0833771	0.354676		tdT+_210127_Slice1_Cell1_AP_100000000_610000005119	0.614519	0.288876	2.31946			tdT-_210126_Slice1_Cell1_AP001#2_100000000_610000000481	0.231851	0.0317293	4.21651		tdT+_210126_Slice2_Cell2_AP001_100000000_610000002239	0.175727	0.129113	1.53385				tdT+_210209_Slice2_Cell2_AP002	7.99329	2.2838	2.09348	3.61601			tdT+_210205_Slice1_Cell2_AP	9.14413	2.56036	1.82883	4.75496
tdT-_210128_Slice2_Cell2_AP001_100000000_610000002336	0.0172287	0.0206996	0.23114		tdT+_210127_Slice1_Cell1_AP_100000000_610000005160	0.514597	0.259428	2.1409			tdT-_210126_Slice1_Cell1_AP001#2_100000000_610000000560	0.253038	0.121863	3.31385		tdT+_210126_Slice2_Cell2_AP001_100000000_610000002270	0.0362644	0.0221516	0.930339				tdT+_210209_Slice3_Cell2_AP	24.1941	8.90159	8.21685	7.07562			tdT+_210205_Slice1_Cell2_AP001	29.7004	9.75559	11.7067	8.23805
tdT-_210128_Slice2_Cell2_AP003_100000000_610000000749	0.408955	0.145773	5.07848		tdT+_210127_Slice1_Cell1_AP_100000000_610000005199	0.159315	0.0966314	1.29619			tdT-_210126_Slice1_Cell1_AP001#2_100000000_610000000626	0.0439434	0.0192829	1.46289		tdT+_210126_Slice2_Cell2_AP001_100000000_610000002283	0.269975	0.123365	2.18986				tdT+_210209_Slice3_Cell2_AP001	21.0048	6.93735	7.13006	6.93735			tdT+_210205_Slice1_Cell2_AP002	30.692	11.1759	9.00743	10.5087
tdT-_210128_Slice2_Cell2_AP003_100000000_610000000834	0.300922	0.0421407	4.63888		tdT+_210127_Slice1_Cell1_AP_100000000_610000006814	0.0632247	0.0766824	0.422032			tdT-_210126_Slice1_Cell1_AP001#2_100000000_610000000656	0.21377	0.0862548	2.62963		tdT+_210126_Slice2_Cell2_AP001_100000000_610000002325	0.778938	0.390652	3.21959				tdT+_210209_Slice3_Cell2_AP002	14.7307	4.84564	4.84564	5.03946			tdT+_210205_Slice1_Cell2_AP003#2	17.8008	4.76807	5.08594	7.94678
tdT-_210128_Slice2_Cell2_AP003_100000000_610000000912	0.187584	0.0587595	3.00784		tdT+_210127_Slice1_Cell1_AP_100000000_610000006823	0.164073	0.10329	0.51444			tdT-_210126_Slice1_Cell1_AP001#2_100000000_610000000711	0.0765622	0.0462013	1.56378		tdT+_210126_Slice2_Cell2_AP001_100000000_610000002387	0.459772	0.0954942	1.96409				tdT+_210211_Slice1_Cell2_AP001	12.2878	2.57187	4.57221	4.85798			tdT+_210205_Slice1_Cell2_AP004	22.8662	10.7717	6.99216	5.10239
tdT-_210128_Slice2_Cell2_AP003_100000000_610000000960	0.154736	0.0711138	2.85277		tdT+_210127_Slice1_Cell1_AP_100000000_610000003807	0.436608	0.161731	3.21402			tdT-_210126_Slice1_Cell1_AP001#2_100000000_610000002160	0.0567894	0.0356058	0.70709		tdT+_210126_Slice2_Cell2_AP001_100000000_610000002425	0.188307	0.119833	1.45617				tdT+_210211_Slice1_Cell2_AP002	13.9199	2.49845	3.74767	7.6738			tdT+_210205_Slice2_Cell2_AP	25.4656	8.26804	9.59093	7.6066
tdT-_210128_Slice2_Cell2_AP003_100000000_610000001012	0.0857126	0.0299731	1.47272		tdT+_210127_Slice1_Cell1_AP_100000000_610000005365	0.146988	0.0893442	1.19954			tdT-_210126_Slice1_Cell1_AP001#2_100000000_610000002176	0.0459532	0.0406379	0.395343		tdT+_210126_Slice2_Cell2_AP001_100000000_610000002447	0.0568931	0.0459807	0.884573				tdT+_210211_Slice1_Cell2_AP003	12.9534	4.25035	5.26234	3.44076			tdT+_210205_Slice2_Cell2_AP001	20.823	10.044	7.3493	3.42967
tdT-_210128_Slice2_Cell2_AP003_100000000_610000001033	0.168561	0.063952	1.84459		tdT+_210127_Slice1_Cell1_AP_100000000_610000005392	0.390609	0.202709	1.82099			tdT-_210126_Slice1_Cell1_AP001#2_100000000_610000002188	0.0570068	0.0604386	0.346246		tdT+_210126_Slice2_Cell2_AP001_100000000_610000002464	0.297823	0.102351	1.74892				tdT+_210211_Slice2_Cell2_AP	15.1403	4.10585	1.53969	9.49478			tdT+_210205_Slice2_Cell2_AP001#2	18.5993	5.4335	7.73229	5.4335
tdT-_210128_Slice2_Cell2_AP003_100000000_610000001066	0.337968	0.189205	2.90402		tdT+_210127_Slice1_Cell1_AP_100000000_610000005427	0.0343572	0.0287223	0.597835			tdT-_210126_Slice1_Cell1_AP001#2_100000000_610000000963	0.131809	0.0509602	1.7898		tdT+_210126_Slice2_Cell2_AP001_100000000_610000002497	0.364676	0.214052	1.94618				tdT+_210211_Slice2_Cell2_AP001	21.0376	6.23996	3.56569	11.2319			tdT+_210205_Slice2_Cell2_AP002	18.425	6.93928	6.22142	5.26428
tdT-_210128_Slice2_Cell2_AP003_100000000_610000001122	0.224405	0.141553	1.84093		tdT+_210127_Slice1_Cell1_AP_100000000_610000005442	0.347753	0.140364	1.854			tdT-_210126_Slice1_Cell1_AP001#2_100000000_610000000997	0.161399	0.0648312	2.12803		tdT+_210126_Slice2_Cell2_AP001_100000000_610000002535	0.132646	0.0776431	1.37971				tdT+_210211_Slice2_Cell2_AP002	22.8803	7.29516	5.30557	10.2795			tdT+_210205_Slice2_Cell2_AP003	19.9663	8.55699	8.74714	2.66217
tdT-_210128_Slice2_Cell2_AP003_100000000_610000001158	0.436406	0.101677	2.98073		tdT+_210127_Slice1_Cell1_AP_100000000_610000005520	0.573927	0.260361	1.72799			tdT-_210126_Slice1_Cell1_AP001#2_100000000_610000001037	0.108657	0.0579179	1.5743		tdT+_210126_Slice2_Cell2_AP001_100000000_610000002561	0.299698	0.150807	1.77068				tdT+_210212_Slice1_Cell1_AP	18.1401	5.48976	5.25107	7.39924			tdT+_210206_Slice1_Cell1_AP	11.9209	3.13708	3.34622	5.43761
tdT-_210128_Slice2_Cell2_AP003_100000000_610000001215	0.153656	0.0460093	2.07104		tdT+_210127_Slice1_Cell1_AP_100000000_610000005551	0.524101	0.216357	2.15318			tdT-_210126_Slice1_Cell1_AP001#2_100000000_610000001069	0.352275	0.161197	2.50049		tdT+_210126_Slice2_Cell2_AP001_100000000_610000002591	0.327836	0.0619257	2.10397				tdT+_210212_Slice1_Cell1_AP001	23.9512	7.09667	9.93533	6.91925			tdT+_210206_Slice1_Cell1_AP002	19.9707	9.17571	5.5774	5.21756
tdT-_210128_Slice2_Cell2_AP003_100000000_610000001252	0.232601	0.0563296	2.38561		tdT+_210127_Slice1_Cell1_AP_100000000_610000005583	0.502655	0.35671	1.48064			tdT-_210126_Slice1_Cell1_AP001#2_100000000_610000001118	0.206184	0.101513	2.27043		tdT+_210126_Slice2_Cell2_AP001_100000000_610000002629	0.377798	0.133075	2.05135				tdT+_210212_Slice1_Cell1_AP002#1	21.7295	7.03012	6.07147	8.62788			tdT+_210206_Slice1_Cell1_AP003	22.2965	7.19993	8.82572	6.2709
tdT-_210128_Slice2_Cell2_AP003_100000000_610000001294	0.0941609	0.041463	1.66984		tdT+_210127_Slice1_Cell1_AP_100000000_610000006646	0.166046	0.0523301	0.701612			tdT-_210126_Slice1_Cell1_AP001#2_100000000_610000002144	0.108324	0.0348133	0.793068		tdT+_210126_Slice2_Cell2_AP001_100000000_610000002668	0.197641	0.119318	1.30013				tdT+_210212_Slice1_Cell1_AP002#2	23.0311	6.87495	7.9062	8.24995			tdT+_210206_Slice1_Cell1_AP004	22.1459	5.3077	6.58887	10.2494
tdT-_210128_Slice2_Cell2_AP003_100000000_610000001328	0.260423	0.167796	1.89487		tdT+_210127_Slice1_Cell1_AP_100000000_610000006657	0.184327	0.124313	0.578487			tdT-_210126_Slice1_Cell1_AP001#2_100000000_610000002198	0.053462	0.043645	0.376691		tdT+_210126_Slice2_Cell2_AP001_100000000_610000002685	0.32677	0.188893	1.54497				tdT+_210212_Slice1_Cell1_AP003	23.6296	11.1059	7.56147	4.96222			tdT+_210206_Slice1_Cell2_AP	10.9907	2.61683	3.66356	4.71029
tdT-_210128_Slice2_Cell2_AP003_100000000_610000001360	0.35663	0.163286	2.83215		tdT+_210127_Slice1_Cell1_AP_100000000_610000006666	0.0640992	0.0725887	0.436275			tdT-_210126_Slice1_Cell1_AP001#2_100000000_610000002203	0.0586893	0.0517564	0.361075		tdT+_210126_Slice2_Cell2_AP001_100000000_610000002718	0.170397	0.115008	1.33854			average		17.848	6.06139	5.20497	6.57068			tdT+_210206_Slice1_Cell2_AP001	15.0834	4.41465	5.8862	4.78254
tdT-_210128_Slice2_Cell2_AP003_100000000_610000001412	0.184908	0.119475	1.76381		tdT+_210127_Slice1_Cell1_AP_100000000_610000006674	0.155852	0.0879822	0.646674			tdT-_210126_Slice1_Cell1_AP001#2_100000000_610000002132	0.0908583	0.074538	0.516918		tdT+_210126_Slice2_Cell2_AP001_100000000_610000002749	0.300068	0.0495829	1.62034			sem		0.644439	0.313412	0.320562	0.312373			tdT+_210206_Slice1_Cell2_AP002	11.4382	5.14717	1.71572	4.57526
tdT-_210128_Slice2_Cell2_AP003_100000000_610000001445	0.430287	0.147922	3.03613		tdT+_210127_Slice1_Cell1_AP_100000000_610000006681	0.196182	0.110018	0.61194			tdT-_210126_Slice1_Cell1_AP001#2_100000000_610000002195	0.0263384	0.0228544	0.254911		tdT+_210126_Slice2_Cell2_AP001_100000000_610000002782	0.317108	0.181678	1.99914											tdT+_210206_Slice1_Cell2_AP003	12.8332	7.92638	2.26468	2.64213
tdT-_210128_Slice2_Cell2_AP003_100000000_610000001497	0.139812	0.0167299	1.27858		tdT+_210127_Slice1_Cell1_AP_100000000_610000006691	0.0312868	0.0303034	0.314299			tdT-_210126_Slice1_Cell1_AP001#2_100000000_610000002210	0.0369868	0.0515747	0.29643		tdT+_210126_Slice2_Cell2_AP001_100000000_610000002825	0.204531	0.111056	1.2762											tdT+_210206_Slice1_Cell2_AP004	10.4517	3.6179	2.41193	4.42188
tdT-_210128_Slice2_Cell2_AP003_100000000_610000001519	0.18557	0.122127	1.57332		tdT+_210127_Slice1_Cell1_AP_100000000_610000006708	0.31063	0.12159	0.789686			tdT-_210126_Slice1_Cell1_AP002_100000000_610000001132	0.266372	0.152185	1.83955		tdT+_210126_Slice2_Cell2_AP001_100000000_610000002844	0.0865634	0.0651956	1.07228											tdT+_210206_Slice2_Cell2_AP001	16.6	5.07222	5.30278	6.225
tdT-_210128_Slice2_Cell2_AP003_100000000_610000001547	0.157246	0.0381294	1.14062		tdT+_210127_Slice1_Cell1_AP_100000000_610000006720	0.0977657	0.0872466	0.514639			tdT-_210126_Slice1_Cell1_AP002_100000000_610000001166	0.205371	0.0489859	2.4862		tdT+_210126_Slice2_Cell2_AP001_100000000_610000002866	0.117206	0.0630307	0.931483											tdT+_210206_Slice2_Cell2_AP002	14.6123	3.32098	7.30615	3.98518
tdT-_210128_Slice2_Cell2_AP003_100000000_610000001567	0.42462	0.219547	2.31026		tdT+_210127_Slice1_Cell1_AP_100000000_610000006729	0.100161	0.0984088	0.4588			tdT-_210126_Slice1_Cell1_AP002_100000000_610000001113	0.0491438	0.0208967	0.933994		tdT+_210126_Slice2_Cell2_AP001_100000000_610000002884	0.10107	0.0397264	0.971905											tdT+_210206_Slice2_Cell2_AP003	12.7328	6.19434	5.85021	0.34413
tdT-_210128_Slice2_Cell2_AP003_100000000_610000001610	0.162831	0.0271462	1.56987		tdT+_210127_Slice1_Cell1_AP_100000000_610000006733	0.263619	0.146703	0.818421			tdT-_210126_Slice1_Cell1_AP002_100000000_610000000810	0.24455	0.0873198	3.1014		tdT+_210126_Slice2_Cell2_AP001_100000000_610000002902	0.314446	0.0810652	1.61539											tdT+_210206_Slice3_Cell2_AP	15.8752	2.77186	5.54373	7.55963
tdT-_210128_Slice2_Cell2_AP003_100000000_610000001642	0.0621003	0.0311633	0.974421		tdT+_210127_Slice1_Cell1_AP_100000000_610000006741	0.132014	0.0722555	0.499052			tdT-_210126_Slice1_Cell1_AP002_100000000_610000000871	0.188031	0.0549385	2.07358		tdT+_210126_Slice2_Cell2_AP001_100000000_610000002980	0.963741	0.285591	2.64983											tdT+_210206_Slice3_Cell2_AP001	22.9581	6.66527	9.81276	6.48013
tdT-_210128_Slice2_Cell2_AP003_100000000_610000001660	0.228442	0.0513782	2.04116		tdT+_210127_Slice1_Cell1_AP_100000000_610000006753	0.187681	0.115894	0.610639			tdT-_210126_Slice1_Cell1_AP002_100000000_610000000915	0.247369	0.0808938	2.44966		tdT+_210126_Slice2_Cell2_AP001_100000000_610000003025	0.188406	0.116865	1.43836											tdT+_210206_Slice3_Cell2_AP002	19.0018	7.94621	5.5278	5.5278
tdT-_210128_Slice2_Cell2_AP003_100000000_610000001701	0.130827	0.0542672	1.22175		tdT+_210127_Slice1_Cell1_AP_100000000_610000006775	0.144985	0.112103	0.561696			tdT-_210126_Slice1_Cell1_AP002_100000000_610000001485	0.200294	0.099185	1.227		tdT+_210126_Slice2_Cell2_AP001_100000000_610000003056	0.0723321	0.0387268	0.7888											tdT+_210206_Slice3_Cell2_AP003	14.6726	6.86802	5.30711	2.49746
tdT-_210128_Slice2_Cell2_AP003_100000000_610000001725	0.130943	0.0488726	1.50481		tdT+_210127_Slice1_Cell1_AP_100000000_610000006781	0.232084	0.211402	0.682803			tdT-_210126_Slice1_Cell1_AP002_100000000_610000001509	0.237962	0.0387369	1.80096		tdT+_210126_Slice2_Cell2_AP001_100000000_610000003073	0.271567	0.093532	1.51491											tdT+_210210_Slice2_Cell1_AP	17.1261	5.10779	5.70871	6.30962
tdT-_210128_Slice2_Cell2_AP003_100000000_610000001755	0.357624	0.148411	2.03998		tdT+_210127_Slice1_Cell1_AP_100000000_610000006790	0.0904435	0.0729197	0.422469			tdT-_210126_Slice1_Cell1_AP002_100000000_610000001543	0.0366037	0.0182571	0.587268		tdT+_210126_Slice2_Cell2_AP001_100000000_610000003106	0.633684	0.365238	1.9175											tdT+_210210_Slice2_Cell1_AP001	16.4008	4.1002	3.41683	8.88376
tdT-_210128_Slice2_Cell2_AP003_100000000_610000001789	0.150424	0.0309551	1.16675		tdT+_210127_Slice1_Cell1_AP_100000000_610000006796	0.0990173	0.0958681	0.462605			tdT-_210126_Slice1_Cell1_AP002_100000000_610000001556	0.100085	0.018108	0.981633		tdT+_210126_Slice2_Cell2_AP001_100000000_610000003143	0.186709	0.0894617	0.903707											tdT+_210210_Slice2_Cell1_AP001#2	24.3712	7.52199	8.12375	8.7255
tdT-_210128_Slice2_Cell2_AP003_100000000_610000001813	0.14835	0.062803	1.15641		tdT+_210127_Slice1_Cell1_AP_100000000_610000006806	0.0837201	0.123236	0.426949			tdT-_210126_Slice1_Cell1_AP002_100000000_610000001217	0.062508	0.0291099	1.09843		tdT+_210126_Slice2_Cell2_AP001_100000000_610000003161	0.342061	0.133225	1.73987											tdT+_210210_Slice2_Cell1_AP003	26.5935	8.65088	8.33048	9.61209
tdT-_210128_Slice2_Cell2_AP003_100000000_610000001834	0.0430137	0.0187584	0.682798		tdT+_210127_Slice1_Cell1_AP_100000000_610000003884	0.345882	0.1618	2.49325			tdT-_210126_Slice1_Cell1_AP002_100000000_610000001238	0.20038	0.0766164	1.84241		tdT+_210126_Slice2_Cell2_AP001_100000000_610000003199	0.0205016	0.0187898	0.523026											tdT+_210210_Slice2_Cell1_AP004	25.7201	13.1417	9.01143	3.56702
tdT-_210128_Slice2_Cell2_AP003_100000000_610000001848	0.224454	0.0887704	1.25529		tdT+_210127_Slice1_Cell1_AP_100000000_610000003924	0.232602	0.0455477	2.43746			tdT-_210126_Slice1_Cell1_AP002_100000000_610000001274	0.0631338	0.0185654	0.971078		tdT+_210126_Slice2_Cell2_AP001_100000000_610000003215	0.0799354	0.0242952	0.822778											tdT+_210210_Slice3_Cell2_AP	13.6389	6.06171	4.54628	3.03085
tdT-_210128_Slice2_Cell2_AP003_100000000_610000001865	0.098391	0.0454871	0.780922		tdT+_210127_Slice1_Cell1_AP_100000000_610000003957	0.48926	0.19471	3.39289			tdT-_210126_Slice1_Cell1_AP002_100000000_610000001293	0.167578	0.0486657	1.51944		tdT+_210126_Slice2_Cell2_AP001_100000000_610000003232	0.0763549	0.0344903	0.667004											tdT+_210210_Slice3_Cell2_AP001	18.2166	6.18678	5.3275	6.70234
tdT-_210128_Slice2_Cell2_AP003_100000000_610000001877	0.0555483	0.0220962	0.683908		tdT+_210127_Slice1_Cell1_AP_100000000_610000003835	0.454487	0.0579616	3.02462			tdT-_210126_Slice1_Cell1_AP002_100000000_610000001324	0.0910576	0.0353284	1.47477		tdT+_210126_Slice2_Cell2_AP001_100000000_610000003245	0.384693	0.152205	1.4338											tdT+_210210_Slice3_Cell2_AP002	22.95	10.3463	9.97007	2.6336
tdT-_210128_Slice2_Cell2_AP003_100000000_610000001891	0.190407	0.0197934	1.20468		tdT+_210127_Slice1_Cell1_AP002_100000000_610000002062	0.143652	0.119295	1.10925			tdT-_210126_Slice1_Cell1_AP002_100000000_610000001352	0.260251	0.159627	2.08519		tdT+_210126_Slice2_Cell2_AP001_100000000_610000003271	0.15204	0.0698743	0.938844											tdT+_210210_Slice4_Cell1_AP	11.8298	4.79586	3.51696	3.51696
tdT-_210128_Slice2_Cell2_AP003_100000000_610000001907	0.0707544	0.0236342	0.969107		tdT+_210127_Slice1_Cell1_AP002_100000000_610000002082	0.305832	0.162869	1.95022			tdT-_210126_Slice1_Cell1_AP002_100000000_610000001394	0.168245	0.105088	1.54156		tdT+_210126_Slice2_Cell2_AP001_100000000_610000003290	0.34635	0.182425	0.784187											tdT+_210210_Slice4_Cell1_AP002	13.8257	5.18464	3.45643	5.18464
tdT-_210128_Slice2_Cell2_AP003_100000000_610000001928	0.107946	0.0347121	0.708975		tdT+_210127_Slice1_Cell1_AP002_100000000_610000002122	0.31848	0.130525	1.47012			tdT-_210126_Slice1_Cell1_AP002_100000000_610000001419	0.128269	0.0412789	1.45674		tdT+_210126_Slice2_Cell2_AP001_100000000_610000003310	0.246196	0.0784425	1.07556										average		17.7902	6.28211	6.1248	5.37752
tdT-_210128_Slice2_Cell2_AP003_100000000_610000001943	0.0420848	0.0228058	0.559597		tdT+_210127_Slice1_Cell1_AP002_100000000_610000002259	0.0564925	0.0322774	0.843697			tdT-_210126_Slice1_Cell1_AP002_100000000_610000001450	0.248753	0.0925291	1.79238		tdT+_210126_Slice2_Cell2_AP001_100000000_610000003335	0.0719151	0.0203306	0.838121										sem		0.754996	0.351986	0.372235	0.315457
tdT-_210128_Slice2_Cell2_AP003_100000000_610000001951	0.105511	0.031662	1.08693		tdT+_210127_Slice1_Cell1_AP002_100000000_610000002280	0.350563	0.195778	0.882017			tdT-_210126_Slice1_Cell1_AP002_100000000_610000000390	0.222306	0.0496752	4.02577		tdT+_210126_Slice2_Cell2_AP001_100000000_610000003355	0.469924	0.257568	1.33568
tdT-_210128_Slice2_Cell2_AP003_100000000_610000001977	0.105084	0.0623812	1.07203		tdT+_210127_Slice1_Cell1_AP002_100000000_610000001979	0.0519514	0.0215492	0.839127			tdT-_210126_Slice1_Cell1_AP002_100000000_610000000468	0.13888	0.0332809	2.42089		tdT+_210126_Slice2_Cell2_AP001_100000000_610000003383	0.193972	0.11417	0.800296
tdT-_210128_Slice2_Cell2_AP003_100000000_610000001998	0.324094	0.116858	1.39103		tdT+_210127_Slice1_Cell1_AP002_100000000_610000001993	0.202842	0.130189	1.1405			tdT-_210126_Slice1_Cell1_AP002_100000000_610000000518	0.178326	0.08385	3.09415		tdT+_210126_Slice2_Cell2_AP001_100000000_610000003394	0.1647	0.0676466	1.17131
tdT-_210128_Slice2_Cell2_AP003_100000000_610000002014	0.0854007	0.0365384	0.786195		tdT+_210127_Slice1_Cell1_AP002_100000000_610000002019	0.145205	0.079401	1.19926			tdT-_210126_Slice1_Cell1_AP002_100000000_610000000579	0.173794	0.0932649	2.82992		tdT+_210126_Slice2_Cell2_AP001_100000000_610000003419	0.213871	0.0712291	0.845255
tdT-_210128_Slice2_Cell2_AP003_100000000_610000002031	0.135442	0.087665	0.787405		tdT+_210127_Slice1_Cell1_AP002_100000000_610000002045	0.0623148	0.0257079	0.852163			tdT-_210126_Slice1_Cell1_AP002_100000000_610000000635	0.0520252	0.0308628	1.18585		tdT+_210126_Slice2_Cell2_AP001_100000000_610000003428	0.206706	0.183543	0.634724
tdT-_210128_Slice2_Cell2_AP003_100000000_610000002043	0.0942197	0.0360621	1.37971		tdT+_210127_Slice1_Cell1_AP002_100000000_610000002693	0.0938982	0.0206043	0.614292			tdT-_210126_Slice1_Cell1_AP002_100000000_610000000656	0.250905	0.0897507	2.65945		tdT+_210126_Slice2_Cell2_AP001_100000000_610000003441	0.104533	0.0833215	0.512455
tdT-_210128_Slice2_Cell2_AP003_100000000_610000002070	0.0505664	0.0298342	0.481239		tdT+_210127_Slice1_Cell1_AP002_100000000_610000002700	0.0437588	0.0187548	0.657394			tdT-_210126_Slice1_Cell1_AP002_100000000_610000000774	0.171501	0.0533855	1.80252		tdT+_210126_Slice2_Cell2_AP001_100000000_610000003449	0.0748633	0.0408909	0.496466
tdT-_210128_Slice2_Cell2_AP003_100000000_610000002079	0.153265	0.0980965	0.653502		tdT+_210127_Slice1_Cell1_AP002_100000000_610000002715	0.228331	0.103827	1.06084			tdT-_210126_Slice1_Cell1_AP002_100000000_610000001821	0.0540566	0.0578403	0.325866		tdT+_210126_Slice2_Cell2_AP001_100000000_610000003459	0.0950387	0.0637513	0.596825
tdT-_210128_Slice2_Cell2_AP003_100000000_610000002084	0.0908278	0.0254785	0.561005		tdT+_210127_Slice1_Cell1_AP002_100000000_610000002148	0.645977	0.249526	2.47286			tdT-_210126_Slice1_Cell1_AP002_100000000_610000001636	0.235283	0.112601	1.58497		tdT+_210126_Slice2_Cell2_AP001_100000000_610000003472	0.218704	0.10976	0.857313
tdT-_210128_Slice2_Cell2_AP003_100000000_610000002095	0.0965799	0.0525046	0.753837		tdT+_210127_Slice1_Cell1_AP002_100000000_610000002192	0.111736	0.0463343	1.04991			tdT-_210126_Slice1_Cell1_AP002_100000000_610000001666	0.245732	0.131122	1.06098		tdT+_210126_Slice2_Cell2_AP001_100000000_610000003492	0.119404	0.0832755	0.580844
tdT-_210128_Slice2_Cell2_AP003_100000000_610000002107	0.124907	0.026902	0.819296		tdT+_210127_Slice1_Cell1_AP002_100000000_610000002212	0.508401	0.350354	1.72254			tdT-_210126_Slice1_Cell1_AP002_100000000_610000001682	0.123121	0.0497243	1.258		tdT+_210126_Slice2_Cell2_AP001_100000000_610000003501	0.512797	0.252283	1.26228
tdT-_210128_Slice2_Cell2_AP003_100000000_610000002121	0.0340508	0.0177623	0.351172		tdT+_210127_Slice1_Cell1_AP002_100000000_610000002244	0.0468321	0.0387554	0.668074			tdT-_210126_Slice1_Cell1_AP002_100000000_610000000963	0.139325	0.0401572	1.50156		tdT+_210126_Slice2_Cell2_AP001_100000000_610000003526	0.154072	0.0818134	0.89459
tdT-_210128_Slice2_Cell2_AP003_100000000_610000002128	0.0901451	0.0465919	0.633259		tdT+_210127_Slice1_Cell1_AP002_100000000_610000002750	0.36191	0.112258	1.22089			tdT-_210126_Slice1_Cell1_AP002_100000000_610000000995	0.198395	0.10182	2.03869		tdT+_210126_Slice2_Cell2_AP001_100000000_610000003545	0.120326	0.044416	0.677531
tdT-_210128_Slice2_Cell2_AP003_100000000_610000002140	0.247175	0.126229	0.943697		tdT+_210127_Slice1_Cell1_AP002_100000000_610000002771	0.190002	0.121673	0.76521			tdT-_210126_Slice1_Cell1_AP002_100000000_610000001037	0.088513	0.0236611	1.35179		tdT+_210126_Slice2_Cell2_AP001_100000000_610000003554	0.0711128	0.0471275	0.611064
tdT-_210128_Slice2_Cell2_AP003_100000000_610000002153	0.0464218	0.0295021	0.525965		tdT+_210127_Slice1_Cell1_AP002_100000000_610000002779	0.156114	0.0991227	0.770973			tdT-_210126_Slice1_Cell1_AP002_100000000_610000001063	0.222254	0.0372817	2.58837		tdT+_210126_Slice2_Cell2_AP001_100000000_610000003569	0.157478	0.132554	0.55229
tdT-_210128_Slice2_Cell2_AP003_100000000_610000002165	0.0879016	0.0367561	0.617034		tdT+_210127_Slice1_Cell1_AP002_100000000_610000002791	0.3088	0.15005	1.12813			tdT-_210126_Slice1_Cell1_AP002_100000000_610000001771	0.0611417	0.0758128	0.381443		tdT+_210126_Slice2_Cell2_AP001_100000000_610000003582	0.0728268	0.0547094	0.500112
tdT-_210128_Slice2_Cell2_AP003_100000000_610000002176	0.020566	0.0201012	0.247717		tdT+_210127_Slice1_Cell1_AP002_100000000_610000002810	0.19882	0.115666	0.674066			tdT-_210126_Slice1_Cell1_AP002_100000000_610000001775	0.137783	0.0962552	0.632757		tdT+_210126_Slice2_Cell2_AP001_100000000_610000003594	0.199469	0.0732409	0.822435
tdT-_210128_Slice2_Cell2_AP003_100000000_610000002181	0.154884	0.071662	0.762894		tdT+_210127_Slice1_Cell1_AP002_100000000_610000002816	0.319253	0.0904719	1.16156			tdT-_210126_Slice1_Cell1_AP002_100000000_610000001788	0.0273664	0.0268272	0.288559		tdT+_210126_Slice2_Cell2_AP001_100000000_610000003608	0.123003	0.163072	0.452345
tdT-_210128_Slice2_Cell2_AP003_100000000_610000002196	0.137078	0.0617699	0.599643		tdT+_210127_Slice1_Cell1_AP002_100000000_610000002827	0.0516635	0.0299789	0.570612			tdT-_210126_Slice1_Cell1_AP002_100000000_610000001575	0.137569	0.0429958	1.39448		tdT+_210126_Slice2_Cell2_AP001_100000000_610000003612	0.0547626	0.0603704	0.392384
tdT-_210128_Slice2_Cell2_AP003_100000000_610000002208	0.05702	0.0403568	0.514235		tdT+_210127_Slice1_Cell1_AP002_100000000_610000002839	0.123546	0.0713745	0.655332			tdT-_210126_Slice1_Cell1_AP002_100000000_610000001602	0.108525	0.0295993	0.874845		tdT+_210126_Slice2_Cell2_AP001_100000000_610000003623	0.0470447	0.0408115	0.387862
tdT-_210128_Slice2_Cell2_AP003_100000000_610000002217	0.155263	0.0811691	0.651741		tdT+_210127_Slice1_Cell1_AP002_100000000_610000002853	0.220661	0.0988226	0.679813			tdT-_210126_Slice1_Cell1_AP002_100000000_610000001618	0.0643169	0.0237247	0.814206		tdT+_210126_Slice2_Cell2_AP001_100000000_610000003631	0.0642806	0.0312629	0.182225
tdT-_210128_Slice2_Cell2_AP003_100000000_610000002224	0.0623358	0.0447621	0.399337		tdT+_210127_Slice1_Cell1_AP002_100000000_610000002864	0.145681	0.1032	0.536027			tdT-_210126_Slice1_Cell1_AP002_100000000_610000001815	0.032486	0.0319124	0.286192		tdT+_210126_Slice2_Cell2_AP003_100000000_610000000735	0.0622136	0.0261448	1.62722
tdT-_210128_Slice2_Cell2_AP003_100000000_610000002231	0.0494874	0.0651157	0.33887		tdT+_210127_Slice1_Cell1_AP002_100000000_610000002869	0.212676	0.0818796	0.90845			tdT-_210126_Slice1_Cell1_AP002_100000000_610000001756	0.104922	0.0527025	0.585771		tdT+_210126_Slice2_Cell2_AP003_100000000_610000000761	0.442951	0.24433	3.50564
tdT-_210128_Slice2_Cell2_AP003_100000000_610000002237	0.166859	0.104401	0.788008		tdT+_210127_Slice1_Cell1_AP002_100000000_610000002888	0.132593	0.0639568	0.744843			tdT-_210126_Slice1_Cell1_AP002_100000000_610000001767	0.0287216	0.0400806	0.295216		tdT+_210126_Slice2_Cell2_AP003_100000000_610000000826	0.154094	0.0269852	1.99058
tdT-_210128_Slice2_Cell2_AP003_100000000_610000002251	0.11372	0.0573621	0.636546		tdT+_210127_Slice1_Cell1_AP002_100000000_610000002905	0.20586	0.0764094	0.829232			tdT-_210126_Slice1_Cell1_AP002_100000000_610000001707	0.252084	0.113612	1.32407		tdT+_210126_Slice2_Cell2_AP003_100000000_610000000864	0.0977767	0.0397902	1.46775
tdT-_210128_Slice2_Cell2_AP003_100000000_610000002261	0.0401438	0.037524	0.275053		tdT+_210127_Slice1_Cell1_AP002_100000000_610000002920	0.119486	0.0770549	0.503935			tdT-_210126_Slice1_Cell1_AP002_100000000_610000001731	0.207903	0.100832	1.30554		tdT+_210126_Slice2_Cell2_AP003_100000000_610000000893	0.127435	0.0304886	1.98968
tdT-_210128_Slice2_Cell2_AP003_100000000_610000002264	0.0184196	0.0221789	0.255868		tdT+_210127_Slice1_Cell1_AP002_100000000_610000002927	0.0751741	0.0388911	0.51705			tdT-_210126_Slice1_Cell1_AP002_100000000_610000001794	0.0976242	0.0636742	0.548926		tdT+_210126_Slice2_Cell2_AP003_100000000_610000000932	0.100783	0.0304494	1.68748
tdT-_210128_Slice2_Cell2_AP003_100000000_610000002270	0.0778409	0.0550028	0.513225		tdT+_210127_Slice1_Cell1_AP002_100000000_610000002938	0.0928786	0.0635706	0.492392			tdT-_210126_Slice1_Cell1_AP002_100000000_610000001802	0.0800715	0.0592084	0.426684		tdT+_210126_Slice2_Cell2_AP003_100000000_610000000961	0.220544	0.0788488	2.23777
tdT-_210128_Slice2_Cell2_AP004_100000000_610000000517	0.0998011	0.0321518	2.80681		tdT+_210127_Slice1_Cell1_AP002_100000000_610000002296	0.233919	0.0834102	0.820469			tdT-_210126_Slice1_Cell1_AP002_100000000_610000001808	0.0577483	0.0617873	0.355279		tdT+_210126_Slice2_Cell2_AP003_100000000_610000001003	0.12417	0.0351003	1.50427
tdT-_210128_Slice2_Cell2_AP004_100000000_610000000570	0.0873007	0.0592722	2.90002		tdT+_210127_Slice1_Cell1_AP002_100000000_610000002314	0.0949027	0.0525064	1.00774			tdT-_210126_Slice1_Cell2_AP_100000000_610000000762	0.193136	0.0584606	2.8324		tdT+_210126_Slice2_Cell2_AP003_100000000_610000001031	0.0197375	0.0145899	0.604525
tdT-_210128_Slice2_Cell2_AP004_100000000_610000000631	0.0607552	0.0252519	1.74743		tdT+_210127_Slice1_Cell1_AP002_100000000_610000002336	0.360971	0.208314	1.4788			tdT-_210126_Slice1_Cell2_AP_100000000_610000002771	0.0637237	0.0413987	0.663276		tdT+_210126_Slice2_Cell2_AP003_100000000_610000001042	0.125839	0.0440363	1.48665
tdT-_210128_Slice2_Cell2_AP004_100000000_610000000673	0.222531	0.101501	2.43757		tdT+_210127_Slice1_Cell1_AP002_100000000_610000002366	0.227392	0.0652698	1.1927			tdT-_210126_Slice1_Cell2_AP_100000000_610000000807	0.0976991	0.0294926	2.8922		tdT+_210126_Slice2_Cell2_AP003_100000000_610000001071	0.106938	0.0408511	1.92631
tdT-_210128_Slice2_Cell2_AP004_100000000_610000000727	0.0528357	0.0412144	0.992363		tdT+_210127_Slice1_Cell1_AP002_100000000_610000002388	0.100988	0.0562259	0.893769			tdT-_210126_Slice1_Cell2_AP_100000000_610000002749	0.0428465	0.0229259	0.598798		tdT+_210126_Slice2_Cell2_AP003_100000000_610000001109	0.097134	0.0401974	1.20774
tdT-_210128_Slice2_Cell2_AP004_100000000_610000000750	0.168067	0.0807103	1.87006		tdT+_210127_Slice1_Cell1_AP002_100000000_610000002407	0.282548	0.128877	1.19537			tdT-_210126_Slice1_Cell2_AP_100000000_610000002759	0.126058	0.0460732	0.677674		tdT+_210126_Slice2_Cell2_AP003_100000000_610000001210	0.110287	0.029517	1.25761
tdT-_210128_Slice2_Cell2_AP004_100000000_610000000785	0.270115	0.184188	2.61418		tdT+_210127_Slice1_Cell1_AP002_100000000_610000002430	0.568581	0.301458	1.85323			tdT-_210126_Slice1_Cell2_AP_100000000_610000000727	0.106073	0.0417901	2.91312		tdT+_210126_Slice2_Cell2_AP003_100000000_610000001384	0.0640057	0.0285502	0.712217
tdT-_210128_Slice2_Cell2_AP004_100000000_610000000843	0.0358381	0.0261954	0.973034		tdT+_210127_Slice1_Cell1_AP002_100000000_610000002462	0.361998	0.117161	0.985325			tdT-_210126_Slice1_Cell2_AP_100000000_610000002853	0.283826	0.0760813	1.19558		tdT+_210126_Slice2_Cell2_AP003_100000000_610000001392	0.278979	0.0418466	1.93219
tdT-_210128_Slice2_Cell2_AP004_100000000_610000000870	0.459489	0.286545	3.35867		tdT+_210127_Slice1_Cell1_AP002_100000000_610000002473	0.126431	0.0729752	1.35369			tdT-_210126_Slice1_Cell2_AP_100000000_610000002872	0.267417	0.131226	1.08268		tdT+_210126_Slice2_Cell2_AP003_100000000_610000001429	0.0837054	0.0238491	1.10892
tdT-_210128_Slice2_Cell2_AP004_100000000_610000000940	0.071634	0.0345322	1.5679		tdT+_210127_Slice1_Cell1_AP002_100000000_610000002501	0.371626	0.125443	1.17247			tdT-_210126_Slice1_Cell2_AP_100000000_610000002894	0.0918382	0.040626	0.674806		tdT+_210126_Slice2_Cell2_AP003_100000000_610000001588	0.273414	0.0778441	2.57017
tdT-_210128_Slice2_Cell2_AP004_100000000_610000000975	0.0660058	0.0453286	1.31606		tdT+_210127_Slice1_Cell1_AP002_100000000_610000002516	0.205587	0.0725393	1.51703			tdT-_210126_Slice1_Cell2_AP_100000000_610000002909	0.10734	0.044402	0.686379		tdT+_210126_Slice2_Cell2_AP003_100000000_610000001703	0.117583	0.0382393	1.62954
tdT-_210128_Slice2_Cell2_AP004_100000000_610000001007	0.109222	0.0440213	1.47631		tdT+_210127_Slice1_Cell1_AP002_100000000_610000002550	0.302616	0.113179	1.82781			tdT-_210126_Slice1_Cell2_AP_100000000_610000002923	0.206752	0.102673	0.75362		tdT+_210126_Slice2_Cell2_AP003_100000000_610000001734	0.121767	0.043641	1.33687
tdT-_210128_Slice2_Cell2_AP004_100000000_610000001041	0.0931532	0.0537065	1.62043		tdT+_210127_Slice1_Cell1_AP002_100000000_610000002585	0.327803	0.0755815	1.37871			tdT-_210126_Slice1_Cell2_AP_100000000_610000002939	0.171447	0.100624	0.899194		tdT+_210126_Slice2_Cell2_AP003_100000000_610000001825	0.0570538	0.023942	0.61212
tdT-_210128_Slice2_Cell2_AP004_100000000_610000001080	0.140968	0.0894975	1.71755		tdT+_210127_Slice1_Cell1_AP002_100000000_610000002611	0.110317	0.0313569	0.661948			tdT-_210126_Slice1_Cell2_AP_100000000_610000002958	0.0814029	0.0534418	0.467474		tdT+_210126_Slice2_Cell2_AP003_100000000_610000001891	0.257958	0.102178	1.92029
tdT-_210128_Slice2_Cell2_AP004_100000000_610000001121	0.0327076	0.0303249	0.707543		tdT+_210127_Slice1_Cell1_AP002_100000000_610000002626	0.40833	0.28826	0.839076			tdT-_210126_Slice1_Cell2_AP_100000000_610000002967	0.253943	0.132686	1.13221		tdT+_210126_Slice2_Cell2_AP003_100000000_610000001922	0.0643676	0.0218814	1.00002
tdT-_210128_Slice2_Cell2_AP004_100000000_610000001141	0.0596462	0.0309994	1.06978		tdT+_210127_Slice1_Cell1_AP002_100000000_610000002638	0.516571	0.195135	1.59737			tdT-_210126_Slice1_Cell2_AP_100000000_610000002988	0.0891145	0.0614256	0.484421		tdT+_210126_Slice2_Cell2_AP003_100000000_610000001942	0.0542507	0.0210732	0.890096
tdT-_210128_Slice2_Cell2_AP004_100000000_610000001166	0.140827	0.0931843	1.43909		tdT+_210127_Slice1_Cell1_AP002_100000000_610000002664	0.0531706	0.0254871	0.51739			tdT-_210126_Slice1_Cell2_AP_100000000_610000002786	0.168648	0.100831	1.17959		tdT+_210126_Slice2_Cell2_AP003_100000000_610000002059	0.0488036	0.0236822	0.539814
tdT-_210128_Slice2_Cell2_AP004_100000000_610000001198	0.169683	0.141504	1.20255		tdT+_210127_Slice1_Cell1_AP002_100000000_610000002675	0.106866	0.0693808	0.825686			tdT-_210126_Slice1_Cell2_AP_100000000_610000002808	0.0674708	0.0216995	0.953175		tdT+_210126_Slice2_Cell2_AP003_100000000_610000002068	0.102504	0.0366214	1.43039
tdT-_210128_Slice2_Cell2_AP004_100000000_610000001226	0.0622565	0.0336218	0.945895		tdT+_210127_Slice1_Cell1_AP002_100000000_610000001689	0.623733	0.380253	1.94225			tdT-_210126_Slice1_Cell2_AP_100000000_610000002827	0.14911	0.0655779	0.719239		tdT+_210126_Slice2_Cell2_AP003_100000000_610000002140	0.0937468	0.0332971	1.0897
tdT-_210128_Slice2_Cell2_AP004_100000000_610000001250	0.09741	0.0378724	1.00266		tdT+_210127_Slice1_Cell1_AP002_100000000_610000001726	0.407759	0.280963	2.19864			tdT-_210126_Slice1_Cell2_AP_100000000_610000002844	0.103759	0.0518455	0.605798		tdT+_210126_Slice2_Cell2_AP003_100000000_610000002160	0.188158	0.0194736	1.44863
tdT-_210128_Slice2_Cell2_AP004_100000000_610000001269	0.306466	0.0600992	1.57368		tdT+_210127_Slice1_Cell1_AP002_100000000_610000001766	0.344973	0.184954	1.1484			tdT-_210126_Slice1_Cell2_AP_100000000_610000002560	0.109293	0.0393529	1.10157		tdT+_210126_Slice2_Cell2_AP003_100000000_610000002186	0.0685504	0.0376461	1.04473
tdT-_210128_Slice2_Cell2_AP004_100000000_610000001305	0.0651066	0.0304547	1.08346		tdT+_210127_Slice1_Cell1_AP002_100000000_610000001787	0.899005	0.295594	2.02088			tdT-_210126_Slice1_Cell2_AP_100000000_610000002582	0.155172	0.111585	1.05306		tdT+_210126_Slice2_Cell2_AP003_100000000_610000002211	0.0823361	0.0319596	1.00089
tdT-_210128_Slice2_Cell2_AP004_100000000_610000001334	0.0228558	0.0162189	0.674331		tdT+_210127_Slice1_Cell1_AP002_100000000_610000002730	0.117119	0.0635402	0.748059			tdT-_210126_Slice1_Cell2_AP_100000000_610000002594	0.188613	0.020877	1.07774		tdT+_210126_Slice2_Cell2_AP003_100000000_610000002357	0.075738	0.0203324	1.15391
tdT-_210128_Slice2_Cell2_AP004_100000000_610000001354	0.0351075	0.0316762	0.586732		tdT+_210127_Slice1_Cell1_AP002_100000000_610000002743	0.0377601	0.0205985	0.423274			tdT-_210126_Slice1_Cell2_AP_100000000_610000000845	0.190539	0.0945842	3.68545		tdT+_210126_Slice2_Cell2_AP003_100000000_610000002380	0.0800309	0.0324642	1.0763
tdT-_210128_Slice2_Cell2_AP004_100000000_610000001371	0.0297671	0.017158	0.702903		tdT+_210127_Slice1_Cell1_AP002_100000000_610000000463	0.149644	0.0392886	1.90114			tdT-_210126_Slice1_Cell2_AP_100000000_610000000916	0.246032	0.193103	3.34033		tdT+_210126_Slice2_Cell2_AP003_100000000_610000002438	0.0260881	0.0190432	0.420173
tdT-_210128_Slice2_Cell2_AP004_100000000_610000001388	0.0583605	0.0325975	0.602915		tdT+_210127_Slice1_Cell1_AP002_100000000_610000000503	0.136664	0.0393178	2.21733			tdT-_210126_Slice1_Cell2_AP_100000000_610000000955	0.192832	0.0810517	3.10571		tdT+_210126_Slice2_Cell2_AP003_100000000_610000002447	0.0462023	0.0197773	0.615624
tdT-_210128_Slice2_Cell2_AP004_100000000_610000001406	0.130422	0.0686733	1.08431		tdT+_210127_Slice1_Cell1_AP002_100000000_610000000541	0.220777	0.126276	2.16813			tdT-_210126_Slice1_Cell2_AP_100000000_610000001017	0.591961	0.424564	4.12325		tdT+_210126_Slice2_Cell2_AP003_100000000_610000002455	0.075009	0.0310963	0.961896
tdT-_210128_Slice2_Cell2_AP004_100000000_610000001432	0.0985732	0.0496862	0.933978		tdT+_210127_Slice1_Cell1_AP002_100000000_610000000584	0.336802	0.165392	2.22978			tdT-_210126_Slice1_Cell2_AP_100000000_610000001091	0.220956	0.108782	3.13933		tdT+_210126_Slice2_Cell2_AP003_100000000_610000002475	0.0652124	0.0371155	0.859639
tdT-_210128_Slice2_Cell2_AP004_100000000_610000001456	0.140456	0.101557	0.731036		tdT+_210127_Slice1_Cell1_AP002_100000000_610000000629	0.0997853	0.0391567	1.58684			tdT-_210126_Slice1_Cell2_AP_100000000_610000001147	0.234388	0.0883965	2.86098		tdT+_210126_Slice2_Cell2_AP003_100000000_610000002496	0.186985	0.0488301	0.900174
tdT-_210128_Slice2_Cell2_AP004_100000000_610000001481	0.260079	0.143166	1.31396		tdT+_210127_Slice1_Cell1_AP002_100000000_610000000659	0.320557	0.219215	1.80081			tdT-_210126_Slice1_Cell2_AP_100000000_610000001179	0.0828548	0.021343	2.04785		tdT+_210126_Slice2_Cell2_AP003_100000000_610000002508	0.0606922	0.0278524	0.652837
tdT-_210128_Slice2_Cell2_AP004_100000000_610000001514	0.15377	0.104426	1.05652		tdT+_210127_Slice1_Cell1_AP002_100000000_610000000694	0.442165	0.120889	2.47631			tdT-_210126_Slice1_Cell2_AP_100000000_610000001219	0.0838233	0.033337	2.07224		tdT+_210126_Slice2_Cell2_AP003_100000000_610000002520	0.192635	0.032555	0.903926
tdT-_210128_Slice2_Cell2_AP004_100000000_610000001534	0.0903295	0.056182	0.713951		tdT+_210127_Slice1_Cell1_AP002_100000000_610000000734	0.546826	0.159485	2.76986			tdT-_210126_Slice1_Cell2_AP_100000000_610000001263	0.330556	0.192734	3.63532		tdT+_210126_Slice2_Cell2_AP003_100000000_610000002530	0.152668	0.0746833	1.26536
tdT-_210128_Slice2_Cell2_AP004_100000000_610000001553	0.0737484	0.0472415	0.673995		tdT+_210127_Slice1_Cell1_AP002_100000000_610000000781	0.259759	0.116994	1.91168			tdT-_210126_Slice1_Cell2_AP_100000000_610000001333	0.175249	0.0331388	2.52072		tdT+_210126_Slice2_Cell2_AP003_100000000_610000002553	0.0687024	0.0241955	0.740672
tdT-_210128_Slice2_Cell2_AP004_100000000_610000001574	0.0803915	0.0672738	0.562469		tdT+_210127_Slice1_Cell1_AP002_100000000_610000000818	0.0603108	0.0340312	1.33867			tdT-_210126_Slice1_Cell2_AP_100000000_610000001385	0.208046	0.167856	1.91637		tdT+_210126_Slice2_Cell2_AP003_100000000_610000002569	0.223087	0.12802	0.901849
tdT-_210128_Slice2_Cell2_AP004_100000000_610000001587	0.106997	0.0462939	0.82097		tdT+_210127_Slice1_Cell1_AP002_100000000_610000000840	0.556636	0.161681	3.25077			tdT-_210126_Slice1_Cell2_AP_100000000_610000001420	0.35813	0.129671	3.10041		tdT+_210126_Slice2_Cell2_AP003_100000000_610000002581	0.264536	0.101209	1.39897
tdT-_210128_Slice2_Cell2_AP004_100000000_610000001608	0.166906	0.0990797	0.79409		tdT+_210127_Slice1_Cell1_AP002_100000000_610000000897	0.51668	0.314128	2.45941			tdT-_210126_Slice1_Cell2_AP_100000000_610000001475	0.205741	0.116504	2.1291		tdT+_210126_Slice2_Cell2_AP003_100000000_610000002617	0.15346	0.0485194	1.01624
tdT-_210128_Slice2_Cell2_AP004_100000000_610000001626	0.222032	0.14658	1.04202		tdT+_210127_Slice1_Cell1_AP002_100000000_610000000944	0.0821477	0.0357407	1.37908			tdT-_210126_Slice1_Cell2_AP_100000000_610000001518	0.0267671	0.0234786	0.764574		tdT+_210126_Slice2_Cell2_AP003_100000000_610000002638	0.0994259	0.0318917	0.625711
tdT-_210128_Slice2_Cell2_AP004_100000000_610000001646	0.0898751	0.0634774	0.667769		tdT+_210127_Slice1_Cell1_AP002_100000000_610000000971	0.288325	0.19512	1.74902			tdT-_210126_Slice1_Cell2_AP_100000000_610000001538	0.113581	0.0293628	1.54576		tdT+_210126_Slice2_Cell2_AP003_100000000_610000002646	0.0911213	0.0681528	0.461637
tdT-_210128_Slice2_Cell2_AP004_100000000_610000001684	0.0747144	0.0548805	0.613675		tdT+_210127_Slice1_Cell1_AP002_100000000_610000001003	0.101175	0.0273428	1.54988			tdT-_210126_Slice1_Cell2_AP_100000000_610000001572	0.0658387	0.0194259	1.3793		tdT+_210126_Slice2_Cell2_AP003_100000000_610000002655	0.0788749	0.027023	0.66382
tdT-_210128_Slice2_Cell2_AP004_100000000_610000001702	0.0472472	0.0543017	0.417973		tdT+_210127_Slice1_Cell1_AP002_100000000_610000001034	0.625897	0.232622	2.90646			tdT-_210126_Slice1_Cell2_AP_100000000_610000001600	0.14363	0.0260167	1.89456		tdT+_210126_Slice2_Cell2_AP003_100000000_610000002667	0.0777231	0.0516206	0.6241
tdT-_210128_Slice2_Cell2_AP004_100000000_610000001714	0.111074	0.140323	0.509908		tdT+_210127_Slice1_Cell1_AP002_100000000_610000001085	0.74271	0.27775	2.12792			tdT-_210126_Slice1_Cell2_AP_100000000_610000001638	0.277387	0.153176	2.24014		tdT+_210126_Slice2_Cell2_AP003_100000000_610000002679	0.213272	0.0756804	1.03575
tdT-_210128_Slice2_Cell2_AP004_100000000_610000001728	0.0334858	0.0378696	0.428016		tdT+_210127_Slice1_Cell1_AP002_100000000_610000001123	0.544138	0.19408	2.56609			tdT-_210126_Slice1_Cell2_AP_100000000_610000001681	0.381618	0.171429	2.54785		tdT+_210126_Slice2_Cell2_AP003_100000000_610000002696	0.0486621	0.0262259	0.497464
tdT-_210128_Slice2_Cell2_AP004_100000000_610000001740	0.0694997	0.0486663	0.572684		tdT+_210127_Slice1_Cell1_AP002_100000000_610000001172	0.328263	0.202968	2.09465			tdT-_210126_Slice1_Cell2_AP_100000000_610000001768	0.28802	0.194464	2.30457		tdT+_210126_Slice2_Cell2_AP003_100000000_610000002706	0.0495994	0.0318647	0.487839
tdT-_210128_Slice2_Cell2_AP004_100000000_610000001808	0.0603631	0.0460566	0.533438		tdT+_210127_Slice1_Cell1_AP002_100000000_610000001214	0.232798	0.136303	2.10377			tdT-_210126_Slice1_Cell2_AP_100000000_610000001863	0.209063	0.141007	1.96156		tdT+_210126_Slice2_Cell2_AP003_100000000_610000002717	0.0673766	0.029111	0.624664
tdT-_210128_Slice2_Cell2_AP004_100000000_610000001824	0.0780868	0.0684692	0.477857		tdT+_210127_Slice1_Cell1_AP002_100000000_610000001254	0.496491	0.212651	2.38171			tdT-_210126_Slice1_Cell2_AP_100000000_610000001903	0.159419	0.0321918	1.71559		tdT+_210126_Slice2_Cell2_AP003_100000000_610000002729	0.07241	0.0524668	0.443729
tdT-_210128_Slice2_Cell2_AP004_100000000_610000001839	0.082232	0.104102	0.460483		tdT+_210127_Slice1_Cell1_AP002_100000000_610000001295	0.530744	0.117204	1.88424			tdT-_210126_Slice1_Cell2_AP_100000000_610000001996	0.349249	0.202603	2.09005		tdT+_210126_Slice2_Cell2_AP003_100000000_610000002738	0.0352088	0.0391342	0.309523
tdT-_210128_Slice2_Cell2_AP004_100000000_610000001863	0.123347	0.0275542	0.0627569		tdT+_210127_Slice1_Cell1_AP002_100000000_610000001328	0.0477712	0.0356993	1.07395			tdT-_210126_Slice1_Cell2_AP_100000000_610000002036	0.272645	0.117862	2.21095		tdT+_210126_Slice2_Cell2_AP003_100000000_610000002744	0.0176935	0.0143415	0.276448
tdT-_210128_Slice2_Cell2_AP004_100000000_610000001866	0.263588	0.0840368	0.365758		tdT+_210127_Slice1_Cell1_AP002_100000000_610000001352	0.26504	0.165309	1.51868			tdT-_210126_Slice1_Cell2_AP_100000000_610000002077	0.518909	0.201163	2.76233		tdT+_210126_Slice4_Cell2_AP_100000000_610000000614	0.110552	0.0752719	2.68223
tdT-_210128_Slice2_Cell2_AP004_100000000_610000001875	0.0891717	0.116992	0.504381		tdT+_210127_Slice1_Cell1_AP002_100000000_610000001382	0.6748	0.238528	2.08614			tdT-_210126_Slice1_Cell2_AP_100000000_610000002123	0.263466	0.184598	1.87558		tdT+_210126_Slice4_Cell2_AP_100000000_610000000648	0.293528	0.262981	3.33537
tdT-_210128_Slice2_Cell2_AP004_100000000_610000001888	0.0761322	0.0306504	0.0176986		tdT+_210127_Slice1_Cell1_AP002_100000000_610000001422	0.0684301	0.052497	0.899159			tdT-_210126_Slice1_Cell2_AP_100000000_610000002159	0.233294	0.147433	1.86044		tdT+_210126_Slice4_Cell2_AP_100000000_610000000748	0.231059	0.177983	2.8729
tdT-_210128_Slice2_Cell2_AP004_100000000_610000001890	0.161064	0.0411125	0.226744		tdT+_210127_Slice1_Cell1_AP002_100000000_610000001442	0.0919151	0.0652139	1.16072			tdT-_210126_Slice1_Cell2_AP_100000000_610000002193	0.312045	0.0906059	2.48513		tdT+_210126_Slice4_Cell2_AP_100000000_610000000791	0.308577	0.0745546	3.23842
tdT-_210128_Slice2_Cell2_AP004_100000000_610000001896	0.122844	0.038421	0.0369263		tdT+_210127_Slice1_Cell1_AP002_100000000_610000001465	0.676303	0.462454	1.91567			tdT-_210126_Slice1_Cell2_AP_100000000_610000002236	0.162372	0.0901673	1.67273		tdT+_210126_Slice4_Cell2_AP_100000000_610000000844	0.534175	0.151021	4.56337
tdT-_210128_Slice3_Cell1_AP_100000000_610000001116	0.848154	0.492865	4.42179		tdT+_210127_Slice1_Cell1_AP002_100000000_610000001493	0.27473	0.110354	1.09732			tdT-_210126_Slice1_Cell2_AP_100000000_610000002267	0.203286	0.0260903	1.78284		tdT+_210126_Slice4_Cell2_AP_100000000_610000000922	0.224963	0.0800189	3.16588
tdT-_210128_Slice3_Cell1_AP_100000000_610000001196	0.531772	0.355986	3.64901		tdT+_210127_Slice1_Cell1_AP002_100000000_610000001511	0.599782	0.285166	2.44994			tdT-_210126_Slice1_Cell2_AP_100000000_610000002306	0.498692	0.200222	2.34196		tdT+_210126_Slice4_Cell2_AP_100000000_610000000972	0.174753	0.0947913	2.43556
tdT-_210128_Slice3_Cell1_AP_100000000_610000001311	0.0819001	0.0246041	1.83441		tdT+_210127_Slice1_Cell1_AP002_100000000_610000001554	0.330335	0.214757	1.79473			tdT-_210126_Slice1_Cell2_AP_100000000_610000002350	0.455183	0.137484	2.44408		tdT+_210126_Slice4_Cell2_AP_100000000_610000001013	0.0827764	0.0266645	1.75588
tdT-_210128_Slice3_Cell1_AP_100000000_610000001348	0.190093	0.14273	2.20389		tdT+_210127_Slice1_Cell1_AP002_100000000_610000001590	0.325236	0.190775	1.76044			tdT-_210126_Slice1_Cell2_AP_100000000_610000002396	0.0928101	0.0476907	1.38575		tdT+_210126_Slice4_Cell2_AP_100000000_610000001039	0.0627781	0.0375978	1.50818
tdT-_210128_Slice3_Cell1_AP_100000000_610000001391	0.261342	0.0890435	1.82551		tdT+_210127_Slice1_Cell1_AP002_100000000_610000001623	0.124119	0.0703294	1.34978			tdT-_210126_Slice1_Cell2_AP_100000000_610000002422	0.225996	0.159321	1.52926		tdT+_210126_Slice4_Cell2_AP_100000000_610000001065	0.37639	0.258057	2.71201
tdT-_210128_Slice3_Cell1_AP_100000000_610000001417	0.24834	0.101463	2.19528		tdT+_210127_Slice1_Cell1_AP002_100000000_610000001651	0.513998	0.320841	2.11849			tdT-_210126_Slice1_Cell2_AP_100000000_610000002451	0.121651	0.0342818	1.50856		tdT+_210126_Slice4_Cell2_AP_100000000_610000001115	0.216032	0.0530374	2.03472
tdT-_210128_Slice3_Cell1_AP_100000000_610000001459	0.19709	0.0582371	2.44673		tdT+_210127_Slice1_Cell1_AP002_100000000_610000002985	0.158706	0.0742925	0.661876			tdT-_210126_Slice1_Cell2_AP_100000000_610000002483	0.289184	0.120094	1.97919		tdT+_210126_Slice4_Cell2_AP_100000000_610000001147	0.302867	0.20972	2.38735
tdT-_210128_Slice3_Cell1_AP_100000000_610000001503	0.536439	0.303422	3.20443		tdT+_210127_Slice1_Cell1_AP002_100000000_610000002993	0.252544	0.0896161	0.76758			tdT-_210126_Slice1_Cell2_AP_100000000_610000002522	0.320923	0.191937	2.06272		tdT+_210126_Slice4_Cell2_AP_100000000_610000001195	0.19888	0.159329	1.72304
tdT-_210128_Slice3_Cell1_AP_100000000_610000001559	0.131919	0.0434259	1.3275		tdT+_210127_Slice1_Cell1_AP002_100000000_610000003000	0.0871593	0.0733776	0.517537			tdT-_210126_Slice1_Cell2_AP_100000000_610000000648	0.348913	0.163463	4.583		tdT+_210126_Slice4_Cell2_AP_100000000_610000001227	0.157436	0.05599	2.02838
tdT-_210128_Slice3_Cell1_AP_100000000_610000001573	0.101722	0.0719685	1.81102		tdT+_210127_Slice1_Cell1_AP002_100000000_610000003012	0.0977349	0.0515909	0.658571			tdT-_210126_Slice1_Cell2_AP_100000000_610000000584	0.227827	0.156509	4.55385		tdT+_210126_Slice4_Cell2_AP_100000000_610000001269	0.0444661	0.0362135	0.908375
tdT-_210128_Slice3_Cell1_AP_100000000_610000001605	0.862767	0.146125	3.24193		tdT+_210127_Slice1_Cell1_AP002_100000000_610000001820	0.414384	0.244454	2.12513			tdT-_210126_Slice1_Cell2_AP_100000000_610000003033	0.0654177	0.0767159	0.375131		tdT+_210126_Slice4_Cell2_AP_100000000_610000001281	0.048358	0.0253974	1.36895
tdT-_210128_Slice3_Cell1_AP_100000000_610000001644	0.0428188	0.0319077	1.02968		tdT+_210127_Slice1_Cell1_AP002_100000000_610000001858	0.177541	0.153661	1.0097			tdT-_210126_Slice1_Cell2_AP_100000000_610000002617	0.055821	0.0435442	0.738701		tdT+_210126_Slice4_Cell2_AP_100000000_610000001308	0.423432	0.314883	2.4722
tdT-_210128_Slice3_Cell1_AP_100000000_610000001666	0.194344	0.0962931	2.04957		tdT+_210127_Slice1_Cell1_AP002_100000000_610000001878	0.111373	0.0547313	1.41842			tdT-_210126_Slice1_Cell2_AP_100000000_610000002629	0.195926	0.109183	1.52806		tdT+_210126_Slice4_Cell2_AP_100000000_610000001357	0.131644	0.0377401	1.651
tdT-_210128_Slice3_Cell1_AP_100000000_610000001699	0.164886	0.0892163	2.15753		tdT+_210127_Slice1_Cell1_AP002_100000000_610000001906	0.819982	0.321112	1.83244			tdT-_210126_Slice1_Cell2_AP_100000000_610000002686	0.0561853	0.026801	0.732262		tdT+_210126_Slice4_Cell2_AP_100000000_610000001389	0.138789	0.0589346	1.40374
tdT-_210128_Slice3_Cell1_AP_100000000_610000001738	0.600953	0.255015	3.32967		tdT+_210127_Slice1_Cell1_AP002_100000000_610000001934	0.268987	0.158316	1.29088			tdT-_210126_Slice1_Cell2_AP_100000000_610000002698	0.236157	0.166295	1.27658		tdT+_210126_Slice4_Cell2_AP_100000000_610000001418	0.101718	0.0355555	1.31217
tdT-_210128_Slice3_Cell1_AP_100000000_610000001787	0.194678	0.144954	1.7811		tdT+_210127_Slice1_Cell1_AP002_100000000_610000001958	0.24833	0.110841	1.27317			tdT-_210126_Slice1_Cell2_AP_100000000_610000002724	0.222007	0.0359801	1.30858		tdT+_210126_Slice4_Cell2_AP_100000000_610000001447	0.191168	0.125256	1.35384
tdT-_210128_Slice3_Cell1_AP_100000000_610000001820	0.426289	0.238502	2.82426		tdT+_210127_Slice1_Cell1_AP002_100000000_610000002943	0.184623	0.067697	0.788756			tdT-_210126_Slice1_Cell2_AP_100000000_610000003010	0.0702015	0.0811705	0.40012		tdT+_210126_Slice4_Cell2_AP_100000000_610000001472	0.0766961	0.0421469	1.18851
tdT-_210128_Slice3_Cell1_AP_100000000_610000001873	0.113031	0.0705198	2.06137		tdT+_210127_Slice1_Cell1_AP002_100000000_610000002958	0.0670547	0.0351175	0.498264			tdT-_210126_Slice1_Cell2_AP_100000000_610000003018	0.179691	0.127526	0.627002		tdT+_210126_Slice4_Cell2_AP_100000000_610000001499	0.0898516	0.0215465	1.02956
tdT-_210128_Slice3_Cell1_AP_100000000_610000001912	0.298303	0.22294	1.96136		tdT+_210127_Slice1_Cell1_AP002_100000000_610000002968	0.301336	0.148937	0.921727			tdT-_210126_Slice1_Cell2_AP_100000000_610000003026	0.0873093	0.0582405	0.479294		tdT+_210126_Slice4_Cell2_AP_100000000_610000001522	0.232213	0.136284	1.38492
tdT-_210128_Slice3_Cell1_AP_100000000_610000001944	0.226298	0.141155	2.19428		tdT+_210127_Slice1_Cell1_AP002_100000000_610000003024	0.0674285	0.077987	0.402224			tdT-_210126_Slice1_Cell2_AP_100000000_610000003000	0.0411455	0.0387036	0.332131		tdT+_210126_Slice4_Cell2_AP_100000000_610000001561	0.0776726	0.0205915	1.06904
tdT-_210128_Slice3_Cell1_AP_100000000_610000001986	0.216409	0.0873222	2.34677		tdT+_210127_Slice1_Cell1_AP002_100000000_610000003032	0.078879	0.0749965	0.392828			tdT-_210126_Slice1_Cell2_AP_100000000_610000003039	0.0593404	0.0364768	0.467431		tdT+_210126_Slice4_Cell2_AP_100000000_610000001584	0.121405	0.0637921	0.954389
tdT-_210128_Slice3_Cell1_AP_100000000_610000002024	0.0715353	0.0656195	0.938126		tdT+_210127_Slice1_Cell1_AP002_100000000_610000003039	0.0390662	0.0355298	0.309537			tdT-_210126_Slice1_Cell2_AP_100000000_610000003051	0.0721426	0.0822755	0.366755		tdT+_210126_Slice4_Cell2_AP_100000000_610000001601	0.218886	0.0296356	1.17832
tdT-_210128_Slice3_Cell1_AP_100000000_610000002042	0.369611	0.218934	2.39597		tdT+_210127_Slice1_Cell1_AP002_100000000_610000003045	0.0539166	0.0379931	0.40387			tdT-_210126_Slice1_Cell2_AP001_100000000_610000002695	0.20789	0.139018	1.30222		tdT+_210126_Slice4_Cell2_AP_100000000_610000001623	0.0966053	0.041883	1.25019
tdT-_210128_Slice3_Cell1_AP_100000000_610000002087	0.146866	0.0900654	1.58696		tdT+_210127_Slice1_Cell1_AP002_100000000_610000003056	0.0672699	0.0886154	0.335023			tdT-_210126_Slice1_Cell2_AP001_100000000_610000001155	0.132429	0.0638156	1.73237		tdT+_210126_Slice4_Cell2_AP_100000000_610000001651	0.271993	0.082603	1.72459
tdT-_210128_Slice3_Cell1_AP_100000000_610000002118	0.0501421	0.0336074	1.02288		tdT+_210127_Slice1_Cell1_AP002_100000000_610000003060	0.0418123	0.0373349	0.335251			tdT-_210126_Slice1_Cell2_AP001_100000000_610000002656	0.150803	0.0505351	1.53882		tdT+_210126_Slice4_Cell2_AP_100000000_610000001683	0.0988139	0.0386884	0.781215
tdT-_210128_Slice3_Cell1_AP_100000000_610000002140	0.140956	0.101343	1.23637		tdT+_210127_Slice1_Cell1_AP003_100000000_610000004201	0.0768554	0.0733738	0.83946			tdT-_210126_Slice1_Cell2_AP001_100000000_610000002691	0.0193097	0.033064	0.227135		tdT+_210126_Slice4_Cell2_AP_100000000_610000001700	0.154846	0.0781195	1.06285
tdT-_210128_Slice3_Cell1_AP_100000000_610000002157	0.12797	0.0593098	1.30537		tdT+_210127_Slice1_Cell1_AP003_100000000_610000004229	0.110755	0.0472049	1.07142			tdT-_210126_Slice1_Cell2_AP001_100000000_610000002899	0.0515101	0.028532	0.601315		tdT+_210126_Slice4_Cell2_AP_100000000_610000001718	0.248965	0.0709672	1.4414
tdT-_210128_Slice3_Cell1_AP_100000000_610000002173	0.159913	0.0965641	1.39496		tdT+_210127_Slice1_Cell1_AP003_100000000_610000004153	0.150872	0.0563555	1.0363			tdT-_210126_Slice1_Cell2_AP001_100000000_610000002914	0.197376	0.0545871	1.16412		tdT+_210126_Slice4_Cell2_AP_100000000_610000001744	0.200932	0.0921991	1.07355
tdT-_210128_Slice3_Cell1_AP_100000000_610000002200	0.924018	0.235695	2.72972		tdT+_210127_Slice1_Cell1_AP003_100000000_610000004176	0.10813	0.0792327	0.933225			tdT-_210126_Slice1_Cell2_AP001_100000000_610000002940	0.0756655	0.0445791	0.627416		tdT+_210126_Slice4_Cell2_AP_100000000_610000001764	0.0508889	0.0236837	0.742921
tdT-_210128_Slice3_Cell1_AP_100000000_610000002243	0.396782	0.159189	3.12345		tdT+_210127_Slice1_Cell1_AP003_100000000_610000003133	0.607231	0.416954	2.02961			tdT-_210126_Slice1_Cell2_AP001_100000000_610000002959	0.0774704	0.114617	0.530427		tdT+_210126_Slice4_Cell2_AP_100000000_610000001780	0.106797	0.0216706	0.86778
tdT-_210128_Slice3_Cell1_AP_100000000_610000002299	0.25419	0.122329	1.67837		tdT+_210127_Slice1_Cell1_AP003_100000000_610000003181	0.0319486	0.0311244	0.733021			tdT-_210126_Slice1_Cell2_AP001_100000000_610000002988	0.0299421	0.0219965	0.389961		tdT+_210126_Slice4_Cell2_AP_100000000_610000001796	0.179237	0.0669284	1.04991
tdT-_210128_Slice3_Cell1_AP_100000000_610000002326	0.183328	0.0610649	1.69519		tdT+_210127_Slice1_Cell1_AP003_100000000_610000003207	0.0274069	0.0248636	0.781295			tdT-_210126_Slice1_Cell2_AP001_100000000_610000002997	0.0287977	0.0190526	0.596481		tdT+_210126_Slice4_Cell2_AP_100000000_610000001813	0.359356	0.126518	1.14251
tdT-_210128_Slice3_Cell1_AP_100000000_610000002355	0.0957918	0.0236239	1.43077		tdT+_210127_Slice1_Cell1_AP003_100000000_610000003236	0.278694	0.171301	1.62199			tdT-_210126_Slice1_Cell2_AP001_100000000_610000002722	0.107984	0.0769288	1.18975		tdT+_210126_Slice4_Cell2_AP_100000000_610000001832	0.058344	0.0294914	0.538
tdT-_210128_Slice3_Cell1_AP_100000000_610000002383	0.207661	0.108288	1.93359		tdT+_210127_Slice1_Cell1_AP003_100000000_610000003277	0.149732	0.0911474	1.41159			tdT-_210126_Slice1_Cell2_AP001_100000000_610000002746	0.0510918	0.0371358	0.472128		tdT+_210126_Slice4_Cell2_AP_100000000_610000001846	0.0836831	0.0361694	0.659664
tdT-_210128_Slice3_Cell1_AP_100000000_610000002415	0.394638	0.0333945	1.84952		tdT+_210127_Slice1_Cell1_AP003_100000000_610000003310	0.127184	0.112108	1.24713			tdT-_210126_Slice1_Cell2_AP001_100000000_610000002756	0.0331256	0.0182651	0.709059		tdT+_210126_Slice4_Cell2_AP_100000000_610000001858	0.0715039	0.0497776	0.475633
tdT-_210128_Slice3_Cell1_AP_100000000_610000002449	0.459136	0.212506	1.88301		tdT+_210127_Slice1_Cell1_AP003_100000000_610000003342	0.169379	0.121656	1.67232			tdT-_210126_Slice1_Cell2_AP001_100000000_610000002778	0.0993175	0.0703157	1.02999		tdT+_210126_Slice4_Cell2_AP_100000000_610000001867	0.0324574	0.0431715	0.37964
tdT-_210128_Slice3_Cell1_AP_100000000_610000002484	0.953169	0.347464	2.60889		tdT+_210127_Slice1_Cell1_AP003_100000000_610000003380	0.119012	0.0415225	1.2659			tdT-_210126_Slice1_Cell2_AP001_100000000_610000002800	0.151821	0.0816795	1.63193		tdT+_210126_Slice4_Cell2_AP_100000000_610000001876	0.302287	0.0656635	1.10829
tdT-_210128_Slice3_Cell1_AP_100000000_610000002526	0.319413	0.200501	1.3917		tdT+_210127_Slice1_Cell1_AP003_100000000_610000003416	0.128577	0.109882	1.40507			tdT-_210126_Slice1_Cell2_AP001_100000000_610000002837	0.30242	0.129422	1.40488		tdT+_210126_Slice4_Cell2_AP_100000000_610000001897	0.166294	0.112327	0.622444
tdT-_210128_Slice3_Cell1_AP_100000000_610000002553	0.228836	0.08421	1.28312		tdT+_210127_Slice1_Cell1_AP003_100000000_610000003448	0.250388	0.0843144	1.41238			tdT-_210126_Slice1_Cell2_AP001_100000000_610000002889	0.014843	0.022608	0.276979		tdT+_210126_Slice4_Cell2_AP_100000000_610000001902	0.0165313	0.0176448	0.278994
tdT-_210128_Slice3_Cell1_AP_100000000_610000002567	0.156513	0.0553479	1.35636		tdT+_210127_Slice1_Cell1_AP003_100000000_610000003481	0.0136006	0.0120432	0.68958			tdT-_210126_Slice1_Cell2_AP001_100000000_610000000567	0.0851898	0.0346537	3.1294		tdT+_210126_Slice4_Cell2_AP_100000000_610000001911	0.316322	0.178829	0.930324
tdT-_210128_Slice3_Cell1_AP_100000000_610000002593	0.298542	0.116211	1.62732		tdT+_210127_Slice1_Cell1_AP003_100000000_610000003507	0.0439623	0.0356565	1.10087			tdT-_210126_Slice1_Cell2_AP001_100000000_610000000631	0.142156	0.0523658	3.81465		tdT+_210126_Slice4_Cell2_AP_100000000_610000001928	0.122333	0.0712862	0.711917
tdT-_210128_Slice3_Cell1_AP_100000000_610000002621	0.0728507	0.0430804	0.851088		tdT+_210127_Slice1_Cell1_AP003_100000000_610000003534	0.0457765	0.0206577	0.994967			tdT-_210126_Slice1_Cell2_AP001_100000000_610000000731	0.111804	0.0977023	1.96069		tdT+_210126_Slice4_Cell2_AP_100000000_610000001943	0.068264	0.0263716	0.472706
tdT-_210128_Slice3_Cell1_AP_100000000_610000002637	0.355145	0.061981	2.1568		tdT+_210127_Slice1_Cell1_AP003_100000000_610000004008	0.0220874	0.0227598	0.634037			tdT-_210126_Slice1_Cell2_AP001_100000000_610000000772	0.0546291	0.019672	1.39041		tdT+_210126_Slice4_Cell2_AP_100000000_610000001950	0.0313955	0.0182686	0.358527
tdT-_210128_Slice3_Cell1_AP_100000000_610000002674	0.278611	0.142441	1.35212		tdT+_210127_Slice1_Cell1_AP003_100000000_610000004028	0.0964936	0.0531243	1.48391			tdT-_210126_Slice1_Cell2_AP001_100000000_610000000803	0.2586	0.18347	2.52296		tdT+_210126_Slice4_Cell2_AP_100000000_610000001957	0.05122	0.0787874	0.322713
tdT-_210128_Slice3_Cell1_AP_100000000_610000002692	0.196149	0.0475786	1.28141		tdT+_210127_Slice1_Cell1_AP003_100000000_610000004064	0.0595024	0.0600679	0.673219			tdT-_210126_Slice1_Cell2_AP001_100000000_610000000852	0.132405	0.055031	2.57977		tdT+_210126_Slice4_Cell2_AP_100000000_610000001965	0.0575812	0.0533883	0.408728
tdT-_210128_Slice3_Cell1_AP_100000000_610000002719	0.648612	0.179628	1.91725		tdT+_210127_Slice1_Cell1_AP003_100000000_610000004080	0.204659	0.138104	1.41124			tdT-_210126_Slice1_Cell2_AP001_100000000_610000000907	0.0322977	0.0210711	1.35575		tdT+_210126_Slice4_Cell2_AP_100000000_610000001972	0.136248	0.111154	0.625699
tdT-_210128_Slice3_Cell1_AP_100000000_610000002751	0.163338	0.116657	1.05591		tdT+_210127_Slice1_Cell1_AP003_100000000_610000004113	0.138553	0.0814962	1.40027			tdT-_210126_Slice1_Cell2_AP001_100000000_610000000938	0.0994188	0.0273216	2.06291		tdT+_210126_Slice4_Cell2_AP_100000000_610000001983	0.0882602	0.105177	0.379116
tdT-_210128_Slice3_Cell1_AP_100000000_610000002759	0.266249	0.164325	1.43955		tdT+_210127_Slice1_Cell1_AP003_100000000_610000000839	0.0487826	0.0404176	1.5336			tdT-_210126_Slice1_Cell2_AP001_100000000_610000000984	0.0875098	0.0206237	2.14257		tdT+_210126_Slice4_Cell2_AP_100000000_610000001988	0.0105052	0.0139328	0.193504
tdT-_210128_Slice3_Cell1_AP_100000000_610000002773	0.170613	0.121065	1.07998		tdT+_210127_Slice1_Cell1_AP003_100000000_610000000882	0.141741	0.0772937	2.33107			tdT-_210126_Slice1_Cell2_AP001_100000000_610000001028	0.148927	0.0456579	2.5282		tdT+_210126_Slice4_Cell2_AP001_100000000_610000000613	0.405571	0.316629	3.49195
tdT-_210128_Slice3_Cell1_AP_100000000_610000002795	0.0671465	0.0481172	0.903433		tdT+_210127_Slice1_Cell1_AP003_100000000_610000000932	0.0402419	0.0263015	1.58235			tdT-_210126_Slice1_Cell2_AP001_100000000_610000001085	0.496362	0.272744	3.45485		tdT+_210126_Slice4_Cell2_AP001_100000000_610000000744	0.376273	0.173166	2.73868
tdT-_210128_Slice3_Cell1_AP_100000000_610000002811	0.296878	0.0498457	1.16404		tdT+_210127_Slice1_Cell1_AP003_100000000_610000000974	0.0778703	0.037958	1.93214			tdT-_210126_Slice1_Cell2_AP001_100000000_610000002414	0.0550369	0.0157375	0.861342		tdT+_210126_Slice4_Cell2_AP001_100000000_610000001022	0.210897	0.109865	1.66103
tdT-_210128_Slice3_Cell1_AP_100000000_610000002830	0.0457484	0.0340227	0.634979		tdT+_210127_Slice1_Cell1_AP003_100000000_610000004264	0.350208	0.0796373	1.37251			tdT-_210126_Slice1_Cell2_AP001_100000000_610000002437	0.162366	0.137148	1.3127		tdT+_210126_Slice4_Cell2_AP001_100000000_610000001046	0.119214	0.0857808	1.32457
tdT-_210128_Slice3_Cell1_AP_100000000_610000002834	0.204521	0.14229	1.14156		tdT+_210127_Slice1_Cell1_AP003_100000000_610000004286	0.0981975	0.0656424	0.844905			tdT-_210126_Slice1_Cell2_AP001_100000000_610000002467	0.51398	0.277051	2.28235		tdT+_210126_Slice4_Cell2_AP001_100000000_610000001062	0.2364	0.125599	2.27795
tdT-_210128_Slice3_Cell1_AP_100000000_610000002855	0.135652	0.0884594	0.993411		tdT+_210127_Slice1_Cell1_AP003_100000000_610000004300	0.0233814	0.0229068	0.597119			tdT-_210126_Slice1_Cell2_AP001_100000000_610000002509	0.103683	0.0296314	0.964735		tdT+_210126_Slice4_Cell2_AP001_100000000_610000001913	0.220202	0.055072	2.32164
tdT-_210128_Slice3_Cell1_AP_100000000_610000002875	0.14867	0.0926062	1.27343		tdT+_210127_Slice1_Cell1_AP003_100000000_610000004325	0.488955	0.246557	1.6665			tdT-_210126_Slice1_Cell2_AP001_100000000_610000002530	0.0860595	0.0270657	1.42919		tdT+_210126_Slice4_Cell2_AP001_100000000_610000002550	0.286189	0.0482203	1.78337
tdT-_210128_Slice3_Cell1_AP_100000000_610000002898	0.487368	0.216398	2.08034		tdT+_210127_Slice1_Cell1_AP003_100000000_610000004362	0.0565136	0.0304397	1.00109			tdT-_210126_Slice1_Cell2_AP001_100000000_610000002611	0.472995	0.248932	2.27218		tdT+_210126_Slice4_Cell2_AP001_100000000_610000002657	0.176335	0.0674266	2.55597
tdT-_210128_Slice3_Cell1_AP_100000000_610000002936	0.456157	0.240221	2.85126		tdT+_210127_Slice1_Cell1_AP003_100000000_610000004393	0.0760467	0.0434857	0.867348			tdT-_210126_Slice1_Cell2_AP001_100000000_610000001280	0.341747	0.241919	2.86543		tdT+_210126_Slice4_Cell2_AP001_100000000_610000002782	0.324327	0.0835245	2.70214
tdT-_210128_Slice3_Cell1_AP_100000000_610000002989	0.123811	0.0997458	0.818185		tdT+_210127_Slice1_Cell1_AP003_100000000_610000004420	0.0898691	0.0464023	0.933052			tdT-_210126_Slice1_Cell2_AP001_100000000_610000001342	0.03797	0.0217192	1.37282		tdT+_210126_Slice4_Cell2_AP001_100000000_610000002831	0.240893	0.0588443	1.67155
tdT-_210128_Slice3_Cell1_AP_100000000_610000003001	0.0383885	0.0242537	0.587271		tdT+_210127_Slice1_Cell1_AP003_100000000_610000004451	0.230614	0.0867739	1.41494			tdT-_210126_Slice1_Cell2_AP001_100000000_610000001370	0.0439223	0.0327129	1.21582		tdT+_210126_Slice4_Cell2_AP001_100000000_610000002859	0.318726	0.179104	2.25536
tdT-_210128_Slice3_Cell1_AP_100000000_610000003009	0.276397	0.165075	1.09617		tdT+_210127_Slice1_Cell1_AP003_100000000_610000004490	0.167043	0.131277	1.09919			tdT-_210126_Slice1_Cell2_AP001_100000000_610000001398	0.0966199	0.047447	2.06271		tdT+_210126_Slice4_Cell2_AP001_100000000_610000002898	0.164122	0.103444	1.69646
tdT-_210128_Slice3_Cell1_AP_100000000_610000003021	0.0978879	0.0489355	0.976623		tdT+_210127_Slice1_Cell1_AP003_100000000_610000004522	0.533624	0.255071	1.77612			tdT-_210126_Slice1_Cell2_AP001_100000000_610000001441	0.269069	0.204471	2.37309		tdT+_210126_Slice4_Cell2_AP001_100000000_610000002928	0.163433	0.0282363	1.4992
tdT-_210128_Slice3_Cell1_AP_100000000_610000003035	0.0938859	0.0426024	1.07531		tdT+_210127_Slice1_Cell1_AP003_100000000_610000004561	0.351809	0.209383	1.20083			tdT-_210126_Slice1_Cell2_AP001_100000000_610000001493	0.0525794	0.0233462	1.25231		tdT+_210126_Slice4_Cell2_AP001_100000000_610000002958	0.13921	0.0796993	1.37703
tdT-_210128_Slice3_Cell1_AP_100000000_610000003058	0.0307168	0.0188728	0.602968		tdT+_210127_Slice1_Cell1_AP003_100000000_610000004577	0.490674	0.204881	1.71214			tdT-_210126_Slice1_Cell2_AP001_100000000_610000001523	0.0821323	0.0661856	1.60331		tdT+_210126_Slice4_Cell2_AP001_100000000_610000002984	0.197876	0.0408179	1.86102
tdT-_210128_Slice3_Cell1_AP_100000000_610000003069	0.0637039	0.0529591	0.584514		tdT+_210127_Slice1_Cell1_AP003_100000000_610000004619	0.200113	0.109678	1.04107			tdT-_210126_Slice1_Cell2_AP001_100000000_610000001560	0.109476	0.0695952	1.48162		tdT+_210126_Slice4_Cell2_AP001_100000000_610000003021	0.0459035	0.0211813	1.10961
tdT-_210128_Slice3_Cell1_AP_100000000_610000003081	0.239288	0.110086	1.64789		tdT+_210127_Slice1_Cell1_AP003_100000000_610000004636	0.116168	0.103426	0.818651			tdT-_210126_Slice1_Cell2_AP001_100000000_610000001593	0.130377	0.0744654	1.66777		tdT+_210126_Slice4_Cell2_AP001_100000000_610000003041	0.118726	0.0856613	0.994006
tdT-_210128_Slice3_Cell1_AP_100000000_610000003111	0.0749316	0.0340545	0.694529		tdT+_210127_Slice1_Cell1_AP003_100000000_610000004661	0.129146	0.068303	1.19052			tdT-_210126_Slice1_Cell2_AP001_100000000_610000001634	0.130132	0.0916695	1.52888		tdT+_210126_Slice4_Cell2_AP001_100000000_610000003055	0.0610426	0.0192854	1.0871
tdT-_210128_Slice3_Cell1_AP_100000000_610000003122	0.137834	0.0648237	1.08392		tdT+_210127_Slice1_Cell1_AP003_100000000_610000004693	0.0305134	0.0358402	0.545324			tdT-_210126_Slice1_Cell2_AP001_100000000_610000001671	0.105484	0.0457349	1.52291		tdT+_210126_Slice4_Cell2_AP001_100000000_610000003076	0.0825447	0.0262256	0.971333
tdT-_210128_Slice3_Cell1_AP_100000000_610000003144	0.147624	0.048423	1.14156		tdT+_210127_Slice1_Cell1_AP003_100000000_610000004713	0.0979459	0.02796	0.847146			tdT-_210126_Slice1_Cell2_AP001_100000000_610000001707	0.0264218	0.0220515	0.715709		tdT+_210126_Slice4_Cell2_AP001_100000000_610000003095	0.0968032	0.0400047	1.37774
tdT-_210128_Slice3_Cell1_AP_100000000_610000003167	0.142618	0.0466334	1.24962		tdT+_210127_Slice1_Cell1_AP003_100000000_610000004731	0.0968185	0.0759054	1.00181			tdT-_210126_Slice1_Cell2_AP001_100000000_610000001730	0.0801675	0.0747597	0.882653		tdT+_210126_Slice4_Cell2_AP001_100000000_610000003122	0.259983	0.0395564	1.72493
tdT-_210128_Slice3_Cell1_AP_100000000_610000003189	0.109475	0.0675466	0.950914		tdT+_210127_Slice1_Cell1_AP003_100000000_610000003566	0.246149	0.145449	1.43328			tdT-_210126_Slice1_Cell2_AP001_100000000_610000001750	0.34619	0.154247	2.84792		tdT+_210126_Slice4_Cell2_AP001_100000000_610000003155	0.2966	0.130032	1.91499
tdT-_210128_Slice3_Cell1_AP_100000000_610000003207	0.105793	0.0571972	0.789956		tdT+_210127_Slice1_Cell1_AP003_100000000_610000003589	0.106549	0.044289	1.30457			tdT-_210126_Slice1_Cell2_AP001_100000000_610000001807	0.301921	0.0969874	2.22741		tdT+_210126_Slice4_Cell2_AP001_100000000_610000003192	0.122801	0.0505403	0.64642
tdT-_210128_Slice3_Cell1_AP_100000000_610000003217	0.157256	0.0758019	1.0641		tdT+_210127_Slice1_Cell1_AP003_100000000_610000003625	0.076249	0.0557313	1.10819			tdT-_210126_Slice1_Cell2_AP001_100000000_610000001851	0.0202977	0.018855	0.464066		tdT+_210126_Slice4_Cell2_AP001_100000000_610000003201	0.0438645	0.021029	0.524701
tdT-_210128_Slice3_Cell1_AP_100000000_610000003234	0.132009	0.0714071	0.668759		tdT+_210127_Slice1_Cell1_AP003_100000000_610000003658	0.211032	0.096062	1.70706			tdT-_210126_Slice1_Cell2_AP001_100000000_610000003016	0.0288046	0.0230623	0.407604		tdT+_210126_Slice4_Cell2_AP001_100000000_610000003207	0.0620649	0.0253164	0.671628
tdT-_210128_Slice3_Cell1_AP_100000000_610000003240	0.194939	0.135655	1.04123		tdT+_210127_Slice1_Cell1_AP003_100000000_610000003698	0.16246	0.0622214	1.32048			tdT-_210126_Slice1_Cell2_AP001_100000000_610000003023	0.0274973	0.0421488	0.32685		tdT+_210126_Slice4_Cell2_AP001_100000000_610000003220	0.116649	0.0336573	0.616733
tdT-_210128_Slice3_Cell1_AP_100000000_610000003257	0.0576328	0.0271326	0.592819		tdT+_210127_Slice1_Cell1_AP003_100000000_610000003721	0.271825	0.0838394	1.83873			tdT-_210126_Slice1_Cell2_AP001_100000000_610000003033	0.015138	0.0184048	0.266252		tdT+_210126_Slice4_Cell2_AP001_100000000_610000003229	0.0576867	0.0398513	0.407057
tdT-_210128_Slice3_Cell1_AP_100000000_610000003271	0.0512161	0.030044	0.620644		tdT+_210127_Slice1_Cell1_AP003_100000000_610000003761	0.0357156	0.0332056	0.703883			tdT-_210126_Slice1_Cell2_AP001_100000000_610000003039	0.01498	0.0163637	0.332982		tdT+_210126_Slice4_Cell2_AP001_100000000_610000003234	0.0296714	0.0156217	0.474113
tdT-_210128_Slice3_Cell1_AP_100000000_610000003286	0.131316	0.0487226	0.839883		tdT+_210127_Slice1_Cell1_AP003_100000000_610000003784	0.444033	0.247278	2.50056			tdT-_210126_Slice1_Cell2_AP001_100000000_610000003048	0.194372	0.0959044	0.875071		tdT+_210126_Slice4_Cell2_AP001_100000000_610000003244	0.0752586	0.0650999	0.386478
tdT-_210128_Slice3_Cell1_AP_100000000_610000003303	0.0665174	0.0451523	0.436776		tdT+_210127_Slice1_Cell1_AP003_100000000_610000003834	0.120914	0.0672458	1.29257			tdT-_210126_Slice1_Cell2_AP001_100000000_610000003069	0.053871	0.0344303	0.579611		tdT+_210126_Slice4_Cell2_AP001_100000000_610000003251	0.0805225	0.0781489	0.403971
tdT-_210128_Slice3_Cell1_AP_100000000_610000003312	0.0802343	0.051022	0.56433		tdT+_210127_Slice1_Cell1_AP003_100000000_610000003867	0.236532	0.161136	1.94417			tdT-_210126_Slice1_Cell2_AP001_100000000_610000003088	0.0566717	0.0295159	0.418575		tdT+_210126_Slice4_Cell2_AP001_100000000_610000003259	0.0516904	0.0452195	0.368534
tdT-_210128_Slice3_Cell1_AP_100000000_610000003323	0.100046	0.0648956	0.559029		tdT+_210127_Slice1_Cell1_AP003_100000000_610000003913	0.136599	0.074371	1.37933			tdT-_210126_Slice1_Cell2_AP001_100000000_610000003095	0.135473	0.0664687	0.842838		tdT+_210126_Slice4_Cell2_AP001_100000000_610000003264	0.0300238	0.0206435	0.331211
tdT-_210128_Slice3_Cell1_AP_100000000_610000003333	0.119118	0.0512074	0.868139		tdT+_210127_Slice1_Cell1_AP003_100000000_610000003950	0.0844967	0.0740964	0.957943			tdT-_210126_Slice1_Cell2_AP001_100000000_610000003129	0.196038	0.117757	0.672402		tdT+_210126_Slice4_Cell2_AP004_100000000_610000000261	0.157337	0.0292388	3.9945
tdT-_210128_Slice3_Cell1_AP_100000000_610000003352	0.198849	0.108534	0.783465		tdT+_210127_Slice1_Cell1_AP003_100000000_610000003975	0.191893	0.143125	1.30554			tdT-_210126_Slice1_Cell2_AP001_100000000_610000003148	0.0550803	0.0474069	0.405525		tdT+_210126_Slice4_Cell2_AP004_100000000_610000000611	0.0374733	0.0198462	1.55211
tdT-_210128_Slice3_Cell1_AP_100000000_610000003359	0.0805445	0.0266162	0.698566		tdT+_210127_Slice1_Cell1_AP003_100000000_610000000519	0.303207	0.226824	3.40531			tdT-_210126_Slice1_Cell2_AP001_100000000_610000003158	0.108348	0.134446	0.561316		tdT+_210126_Slice4_Cell2_AP004_100000000_610000000643	0.162915	0.113096	2.79598
tdT-_210128_Slice3_Cell1_AP_100000000_610000003372	0.0289985	0.0153638	0.456439		tdT+_210127_Slice1_Cell1_AP003_100000000_610000000581	0.269926	0.180617	3.26115			tdT-_210126_Slice1_Cell2_AP001_100000000_610000003171	0.0703969	0.0568911	0.425216		tdT+_210126_Slice4_Cell2_AP004_100000000_610000000870	0.405798	0.11853	4.26596
tdT-_210128_Slice3_Cell1_AP_100000000_610000003383	0.0327229	0.0228082	0.389619		tdT+_210127_Slice1_Cell1_AP003_100000000_610000000648	0.449646	0.3018	3.91081			tdT-_210126_Slice1_Cell2_AP001_100000000_610000003196	0.146381	0.0911066	0.743066		tdT+_210126_Slice4_Cell2_AP004_100000000_610000000951	0.335152	0.0360093	2.42463
tdT-_210128_Slice3_Cell1_AP_100000000_610000003393	0.0851551	0.0705322	0.564032		tdT+_210127_Slice1_Cell1_AP003_100000000_610000000723	0.0541561	0.0471049	1.7034			tdT-_210126_Slice1_Cell2_AP001_100000000_610000003215	0.0143302	0.0277793	0.230194		tdT+_210126_Slice4_Cell2_AP004_100000000_610000001003	0.0686201	0.0335209	1.96665
tdT-_210128_Slice3_Cell1_AP_100000000_610000003404	0.0699608	0.0356348	0.571367		tdT+_210127_Slice1_Cell1_AP003_100000000_610000000769	0.819091	0.336159	3.55086			tdT-_210126_Slice1_Cell2_AP001_100000000_610000003223	0.0333491	0.0563391	0.343419		tdT+_210126_Slice4_Cell2_AP004_100000000_610000001125	0.260176	0.138205	3.0128
tdT-_210128_Slice3_Cell1_AP_100000000_610000003414	0.218634	0.176443	0.720903		tdT+_210127_Slice1_Cell1_AP003_100000000_610000002739	0.239911	0.194507	1.94269			tdT-_210126_Slice1_Cell2_AP001_100000000_610000002337	0.0322238	0.0189002	0.792032		tdT+_210126_Slice4_Cell2_AP004_100000000_610000001190	0.570612	0.0912791	3.87587
tdT-_210128_Slice3_Cell1_AP_100000000_610000003426	0.0919073	0.0564247	0.637167		tdT+_210127_Slice1_Cell1_AP003_100000000_610000002774	0.189441	0.152633	1.59888			tdT-_210126_Slice1_Cell2_AP001_100000000_610000002359	0.100362	0.0436081	1.33353		tdT+_210126_Slice4_Cell2_AP004_100000000_610000001271	0.0307028	0.0168137	1.04901
tdT-_210128_Slice3_Cell1_AP_100000000_610000003439	0.139831	0.0291778	0.795444		tdT+_210127_Slice1_Cell1_AP003_100000000_610000002814	0.145272	0.0547705	1.61556			tdT-_210126_Slice1_Cell2_AP001_100000000_610000002389	0.0333953	0.0201799	0.429594		tdT+_210126_Slice4_Cell2_AP004_100000000_610000001301	0.0729033	0.0313191	1.97286
tdT-_210128_Slice3_Cell1_AP_100000000_610000003453	0.0609333	0.0359472	0.405872		tdT+_210127_Slice1_Cell1_AP003_100000000_610000002846	0.205855	0.111194	1.51902			tdT-_210126_Slice1_Cell2_AP001_100000000_610000002394	0.0382157	0.0334537	0.665242		tdT+_210126_Slice4_Cell2_AP004_100000000_610000001344	0.21797	0.107396	2.51232
tdT-_210128_Slice3_Cell1_AP_100000000_610000003460	0.449293	0.212908	1.16305		tdT+_210127_Slice1_Cell1_AP003_100000000_610000001018	0.312658	0.11925	1.97796			tdT-_210126_Slice1_Cell2_AP001_100000000_610000002024	0.133002	0.0432322	1.30371		tdT+_210126_Slice4_Cell2_AP004_100000000_610000001401	0.189834	0.141081	2.40396
tdT-_210128_Slice3_Cell1_AP_100000000_610000003480	0.121613	0.0601711	0.575858		tdT+_210127_Slice1_Cell1_AP003_100000000_610000001041	0.122608	0.0895058	1.7753			tdT-_210126_Slice1_Cell2_AP001_100000000_610000002056	0.381318	0.121483	2.57607		tdT+_210126_Slice4_Cell2_AP004_100000000_610000001456	0.060464	0.0367384	1.21601
tdT-_210128_Slice3_Cell1_AP_100000000_610000003487	0.0879212	0.0512464	0.560096		tdT+_210127_Slice1_Cell1_AP003_100000000_610000001083	0.14487	0.0894667	1.68909			tdT-_210126_Slice1_Cell2_AP001_100000000_610000001192	0.0500604	0.0337348	1.03852		tdT+_210126_Slice4_Cell2_AP004_100000000_610000001487	0.159454	0.0631118	2.37698
tdT-_210128_Slice3_Cell1_AP_100000000_610000003500	0.132181	0.0899251	0.731512		tdT+_210127_Slice1_Cell1_AP003_100000000_610000001126	0.558805	0.388453	2.97783			tdT-_210126_Slice1_Cell2_AP001_100000000_610000001215	0.0871696	0.0495613	1.47638		tdT+_210126_Slice4_Cell2_AP004_100000000_610000001544	0.555004	0.0956723	3.27665
tdT-_210128_Slice3_Cell1_AP_100000000_610000003515	0.0496512	0.0519534	0.353615		tdT+_210127_Slice1_Cell1_AP003_100000000_610000001193	0.213049	0.0798264	2.61122			tdT-_210126_Slice1_Cell2_AP001_100000000_610000001242	0.0967439	0.0626446	1.63084		tdT+_210126_Slice4_Cell2_AP004_100000000_610000001612	0.556207	0.0968626	3.32192
tdT-_210128_Slice3_Cell1_AP_100000000_610000003523	0.0727623	0.0355279	0.474999		tdT+_210127_Slice1_Cell1_AP003_100000000_610000001250	0.357528	0.202917	3.01883			tdT-_210126_Slice1_Cell2_AP001_100000000_610000002182	0.266572	0.141293	2.46633		tdT+_210126_Slice4_Cell2_AP004_100000000_610000001682	0.34201	0.0621831	2.45786
tdT-_210128_Slice3_Cell1_AP_100000000_610000003532	0.152155	0.0826325	0.612478		tdT+_210127_Slice1_Cell1_AP003_100000000_610000001316	0.105143	0.0570053	1.95746			tdT-_210126_Slice1_Cell2_AP001_100000000_610000002229	0.174946	0.0833527	1.73315		tdT+_210126_Slice4_Cell2_AP004_100000000_610000001732	0.110442	0.0957864	1.21808
tdT-_210128_Slice3_Cell1_AP_100000000_610000003542	0.0885281	0.0487811	0.562178		tdT+_210127_Slice1_Cell1_AP003_100000000_610000001366	0.122304	0.114425	1.57951			tdT-_210126_Slice1_Cell2_AP001_100000000_610000002268	0.0457395	0.0205936	1.01634		tdT+_210126_Slice4_Cell2_AP004_100000000_610000001763	0.238774	0.166313	2.22724
tdT-_210128_Slice3_Cell1_AP_100000000_610000003551	0.160289	0.0711745	0.70452		tdT+_210127_Slice1_Cell1_AP003_100000000_610000001404	0.0851364	0.060949	1.93719			tdT-_210126_Slice1_Cell2_AP001_100000000_610000001867	0.0249306	0.0268326	0.530181		tdT+_210126_Slice4_Cell2_AP004_100000000_610000001811	0.0555985	0.028104	1.65091
tdT-_210128_Slice3_Cell1_AP_100000000_610000003563	0.0777712	0.101707	0.372118		tdT+_210127_Slice1_Cell1_AP003_100000000_610000001451	0.155455	0.118165	1.93036			tdT-_210126_Slice1_Cell2_AP001_100000000_610000001880	0.0226347	0.0202987	0.735796		tdT+_210126_Slice4_Cell2_AP004_100000000_610000001852	0.252892	0.0307429	1.66044
tdT-_210128_Slice3_Cell1_AP_100000000_610000003568	0.142681	0.0404977	0.744707		tdT+_210127_Slice1_Cell1_AP003_100000000_610000001500	0.221583	0.20842	1.66974			tdT-_210126_Slice1_Cell2_AP001_100000000_610000001899	0.0473565	0.0264789	1.19808		tdT+_210126_Slice4_Cell2_AP004_100000000_610000001886	0.110711	0.0500406	1.56086
tdT-_210128_Slice3_Cell1_AP_100000000_610000003581	0.111969	0.0900533	0.489425		tdT+_210127_Slice1_Cell1_AP003_100000000_610000001521	0.0886767	0.0692466	2.01097			tdT-_210126_Slice1_Cell2_AP001_100000000_610000001927	0.329784	0.15244	2.61191		tdT+_210126_Slice4_Cell2_AP004_100000000_610000001925	0.0392722	0.0345012	0.980077
tdT-_210128_Slice3_Cell1_AP_100000000_610000003588	0.120651	0.0963316	0.472855		tdT+_210127_Slice1_Cell1_AP003_100000000_610000001565	0.316479	0.239082	2.62454			tdT-_210126_Slice1_Cell2_AP001_100000000_610000001982	0.304844	0.108258	2.04199		tdT+_210126_Slice4_Cell2_AP004_100000000_610000001954	0.0233411	0.0206217	0.695105
tdT-_210128_Slice3_Cell1_AP001_100000000_610000000640	0.223219	0.0252403	2.8743		tdT+_210127_Slice1_Cell1_AP003_100000000_610000001619	0.665717	0.449775	3.21273			tdT-_210126_Slice1_Cell2_AP001_100000000_610000002149	0.103054	0.0665786	1.37019		tdT+_210126_Slice4_Cell2_AP004_100000000_610000001977	0.0232563	0.0210518	0.668689
tdT-_210128_Slice3_Cell1_AP001_100000000_610000000692	0.185639	0.0882804	2.45482		tdT+_210127_Slice1_Cell1_AP003_100000000_610000001690	0.272774	0.068391	2.56418			tdT-_210126_Slice1_Cell2_AP001_100000000_610000002315	0.177683	0.113134	1.07923		tdT+_210126_Slice4_Cell2_AP004_100000000_610000001997	0.118381	0.051887	1.5705
tdT-_210128_Slice3_Cell1_AP001_100000000_610000000745	0.0629709	0.0484618	1.42387		tdT+_210127_Slice1_Cell1_AP003_100000000_610000001742	0.567928	0.394388	2.96953			tdT-_210126_Slice1_Cell2_AP001_100000000_610000002104	0.02487	0.0183348	0.501343		tdT+_210126_Slice4_Cell2_AP004_100000000_610000002030	0.026767	0.0161118	0.779933
tdT-_210128_Slice3_Cell1_AP001_100000000_610000000773	0.0804537	0.031229	1.61591		tdT+_210127_Slice1_Cell1_AP003_100000000_610000001808	0.161455	0.0673087	1.84826			tdT-_210126_Slice1_Cell2_AP001_100000000_610000002117	0.0654644	0.0263576	1.3185		tdT+_210126_Slice4_Cell2_AP004_100000000_610000002054	0.171795	0.111057	1.98596
tdT-_210128_Slice3_Cell1_AP001_100000000_610000000804	0.0867826	0.0573484	1.86876		tdT+_210127_Slice1_Cell1_AP003_100000000_610000001855	0.178793	0.053824	1.82607			tdT-_210126_Slice1_Cell2_AP001_100000000_610000002295	0.0248641	0.0185686	0.694615		tdT+_210126_Slice4_Cell2_AP004_100000000_610000002102	0.115617	0.0465434	1.48428
tdT-_210128_Slice3_Cell1_AP001_100000000_610000000836	0.110668	0.0677335	1.56231		tdT+_210127_Slice1_Cell1_AP003_100000000_610000001895	0.420748	0.282564	2.66455			tdT-_210126_Slice1_Cell2_AP002_100000000_610000000736	0.0927359	0.0570714	1.88997		tdT+_210126_Slice4_Cell2_AP004_100000000_610000002139	0.042157	0.0275138	1.07096
tdT-_210128_Slice3_Cell1_AP001_100000000_610000000868	0.190372	0.0861612	2.05674		tdT+_210127_Slice1_Cell1_AP003_100000000_610000001956	0.353369	0.07919	2.39837			tdT-_210126_Slice1_Cell2_AP002_100000000_610000001037	0.108357	0.0241529	1.47558		tdT+_210126_Slice4_Cell2_AP004_100000000_610000002171	0.123671	0.0366043	1.70271
tdT-_210128_Slice3_Cell1_AP001_100000000_610000000907	0.0305746	0.0267888	0.792274		tdT+_210127_Slice1_Cell1_AP003_100000000_610000002013	0.107987	0.0567203	1.68122			tdT-_210126_Slice1_Cell2_AP002_100000000_610000001067	0.172324	0.0747607	2.09298		tdT+_210126_Slice4_Cell2_AP004_100000000_610000002212	0.0406784	0.0309826	0.888146
tdT-_210128_Slice3_Cell1_AP001_100000000_610000000921	0.402571	0.266759	3.47889		tdT+_210127_Slice1_Cell1_AP003_100000000_610000002056	0.265646	0.0926081	1.96036			tdT-_210126_Slice1_Cell2_AP002_100000000_610000000695	0.228182	0.0738717	3.32893		tdT+_210126_Slice4_Cell2_AP004_100000000_610000002241	0.0633528	0.0200055	0.974403
tdT-_210128_Slice3_Cell1_AP001_100000000_610000000987	0.371189	0.218845	2.91378		tdT+_210127_Slice1_Cell1_AP003_100000000_610000002103	0.180965	0.0484752	2.20418			tdT-_210126_Slice1_Cell2_AP002_100000000_610000000993	0.177697	0.0462295	2.36396		tdT+_210126_Slice4_Cell2_AP004_100000000_610000002270	0.157633	0.0269753	1.58219
tdT-_210128_Slice3_Cell1_AP001_100000000_610000001039	0.066046	0.0361307	1.09119		tdT+_210127_Slice1_Cell1_AP003_100000000_610000002145	0.081078	0.0636775	1.52266			tdT-_210126_Slice1_Cell2_AP002_100000000_610000001185	0.243899	0.143169	1.78303		tdT+_210126_Slice4_Cell2_AP004_100000000_610000002309	0.0302258	0.0144099	0.777994
tdT-_210128_Slice3_Cell1_AP001_100000000_610000001055	0.23816	0.137846	2.07789		tdT+_210127_Slice1_Cell1_AP003_100000000_610000002188	0.0655793	0.0388366	1.61511			tdT-_210126_Slice1_Cell2_AP002_100000000_610000001220	0.16766	0.0567353	1.60696		tdT+_210126_Slice4_Cell2_AP004_100000000_610000002334	0.0956999	0.0597988	1.08173
tdT-_210128_Slice3_Cell1_AP001_100000000_610000001089	0.0733456	0.0555509	1.42971		tdT+_210127_Slice1_Cell1_AP003_100000000_610000002223	0.0682378	0.0397585	1.45217			tdT-_210126_Slice1_Cell2_AP002_100000000_610000001245	0.279188	0.111072	1.70268		tdT+_210126_Slice4_Cell2_AP004_100000000_610000002363	0.0429913	0.0343791	0.7476
tdT-_210128_Slice3_Cell1_AP001_100000000_610000001119	0.0766803	0.0500566	1.09788		tdT+_210127_Slice1_Cell1_AP003_100000000_610000002265	0.343876	0.109999	2.28922			tdT-_210126_Slice1_Cell2_AP002_100000000_610000001280	0.391846	0.219498	2.47921		tdT+_210126_Slice4_Cell2_AP004_100000000_610000002405	0.0154919	0.0164584	0.402868
tdT-_210128_Slice3_Cell1_AP001_100000000_610000001130	0.0985544	0.0633382	1.44824		tdT+_210127_Slice1_Cell1_AP003_100000000_610000002319	0.784619	0.261055	3.91344			tdT-_210126_Slice1_Cell2_AP002_100000000_610000001325	0.200561	0.0950211	1.84019		tdT+_210126_Slice4_Cell2_AP004_100000000_610000002441	0.0305589	0.0255675	0.604096
tdT-_210128_Slice3_Cell1_AP001_100000000_610000001156	0.1714	0.0942916	1.92534		tdT+_210127_Slice1_Cell1_AP003_100000000_610000002399	0.516446	0.235551	2.2743			tdT-_210126_Slice1_Cell2_AP002_100000000_610000001361	0.170944	0.0437528	1.34633		tdT+_210126_Slice4_Cell2_AP004_100000000_610000002462	0.226837	0.0698812	1.28678
tdT-_210128_Slice3_Cell1_AP001_100000000_610000001193	0.270414	0.189291	1.95933		tdT+_210127_Slice1_Cell1_AP003_100000000_610000002453	0.196281	0.0789921	1.96817			tdT-_210126_Slice1_Cell2_AP002_100000000_610000001382	0.0448078	0.0208366	0.936863		tdT+_210126_Slice4_Cell2_AP004_100000000_610000002495	0.0309573	0.0275476	0.559061
tdT-_210128_Slice3_Cell1_AP001_100000000_610000001231	0.113534	0.0960914	1.21029		tdT+_210127_Slice1_Cell1_AP003_100000000_610000002496	0.219218	0.10399	1.79401			tdT-_210126_Slice1_Cell2_AP002_100000000_610000001402	0.0926502	0.0249009	1.29838		tdT+_210126_Slice4_Cell2_AP004_100000000_610000002513	0.0467727	0.0418948	0.525813
tdT-_210128_Slice3_Cell1_AP001_100000000_610000001254	0.392461	0.22351	2.14571		tdT+_210127_Slice1_Cell1_AP003_100000000_610000002539	0.625408	0.119912	3.15428			tdT-_210126_Slice1_Cell2_AP002_100000000_610000001429	0.24995	0.133998	1.77172		tdT+_210126_Slice4_Cell2_AP004_100000000_610000002529	0.0169388	0.0402134	0.374852
tdT-_210128_Slice3_Cell1_AP001_100000000_610000001288	0.185263	0.151322	1.52079		tdT+_210127_Slice1_Cell1_AP003_100000000_610000002601	0.0445093	0.0403189	0.834348			tdT-_210126_Slice1_Cell2_AP002_100000000_610000001462	0.0366381	0.0165388	0.705157		tdT+_210126_Slice4_Cell2_AP004_100000000_610000002546	0.0179649	0.0219813	0.381378
tdT-_210128_Slice3_Cell1_AP001_100000000_610000001318	0.233927	0.0953019	1.95914		tdT+_210127_Slice1_Cell1_AP003_100000000_610000002619	0.0977412	0.0684951	1.5131			tdT-_210126_Slice1_Cell2_AP002_100000000_610000001476	0.264755	0.0880833	1.41327		tdT+_210126_Slice4_Cell2_AP004_100000000_610000002564	0.0504985	0.0449985	0.536448
tdT-_210128_Slice3_Cell1_AP001_100000000_610000001353	0.0594599	0.027115	1.30398		tdT+_210127_Slice1_Cell1_AP003_100000000_610000002660	0.633504	0.325686	2.33247			tdT-_210126_Slice1_Cell2_AP002_100000000_610000001110	0.114834	0.0342632	1.59421		tdT+_210126_Slice4_Cell2_AP004_100000000_610000002583	0.033473	0.0469864	0.463497
tdT-_210128_Slice3_Cell1_AP001_100000000_610000001384	0.155998	0.110264	1.3298		tdT+_210127_Slice1_Cell1_AP003_100000000_610000002717	0.0483746	0.0454827	0.741016			tdT-_210126_Slice1_Cell2_AP002_100000000_610000001143	0.323527	0.125025	2.48868		tdT+_210126_Slice4_Cell2_AP004_100000000_610000002601	0.015749	0.0323393	0.252852
tdT-_210128_Slice3_Cell1_AP001_100000000_610000001399	0.181225	0.133965	1.33286		tdT+_210127_Slice1_Cell1_AP003_100000000_610000005170	0.0541158	0.0946773	0.447956			tdT-_210126_Slice1_Cell2_AP002_100000000_610000000546	0.0591383	0.0194714	1.53847		tdT+_210126_Slice4_Cell2_AP004_100000000_610000002617	0.0479684	0.0531803	0.475781
tdT-_210128_Slice3_Cell1_AP001_100000000_610000001426	0.135904	0.0396924	1.26603		tdT+_210127_Slice1_Cell1_AP003_100000000_610000005186	0.437666	0.378573	1.19811			tdT-_210126_Slice1_Cell2_AP002_100000000_610000000569	0.142495	0.0764397	3.39549		tdT+_210126_Slice4_Cell2_AP004_100000000_610000002648	0.0429951	0.0822208	0.357119
tdT-_210128_Slice3_Cell1_AP001_100000000_610000001450	0.0636295	0.0380422	1.14666		tdT+_210127_Slice1_Cell1_AP003_100000000_610000005215	0.0103986	0.0224724	0.281055			tdT-_210126_Slice1_Cell2_AP002_100000000_610000000624	0.0429075	0.0346346	1.16757		tdT+_210129_Slice1_Cell1_AP_100000000_610000000542	0.380093	0.126243	4.36881
tdT-_210128_Slice3_Cell1_AP001_100000000_610000001476	0.34356	0.10023	1.96356		tdT+_210127_Slice1_Cell1_AP003_100000000_610000005233	0.243746	0.170916	1.05147			tdT-_210126_Slice1_Cell2_AP002_100000000_610000000639	0.124104	0.0806552	3.0489		tdT+_210129_Slice1_Cell1_AP_100000000_610000000603	0.297597	0.0576089	4.0382
tdT-_210128_Slice3_Cell1_AP001_100000000_610000001506	0.460563	0.157218	2.34821		tdT+_210127_Slice1_Cell1_AP003_100000000_610000002883	0.184953	0.135898	1.57095			tdT-_210126_Slice1_Cell2_AP002_100000000_610000001730	0.228824	0.0926111	0.725755		tdT+_210129_Slice1_Cell1_AP_100000000_610000000673	0.339529	0.0992602	3.96389
tdT-_210128_Slice3_Cell1_AP001_100000000_610000001552	0.535142	0.194629	2.44002		tdT+_210127_Slice1_Cell1_AP003_100000000_610000002922	0.0540017	0.0420081	0.919453			tdT-_210126_Slice1_Cell2_AP002_100000000_610000001743	0.0121318	0.0157136	0.189018		tdT+_210129_Slice1_Cell1_AP_100000000_610000000738	0.0879834	0.0560927	3.06074
tdT-_210128_Slice3_Cell1_AP001_100000000_610000001597	0.107609	0.0854673	0.930912		tdT+_210127_Slice1_Cell1_AP003_100000000_610000002950	0.295606	0.114299	2.2081			tdT-_210126_Slice1_Cell2_AP002_100000000_610000000774	0.343099	0.0915915	2.88023		tdT+_210129_Slice1_Cell1_AP_100000000_610000000795	0.0333084	0.0172639	1.36884
tdT-_210128_Slice3_Cell1_AP001_100000000_610000001618	0.0813663	0.0496347	0.780615		tdT+_210127_Slice1_Cell1_AP003_100000000_610000003000	0.363555	0.141041	1.9173			tdT-_210126_Slice1_Cell2_AP002_100000000_610000000813	0.282288	0.131032	2.46102		tdT+_210129_Slice1_Cell1_AP_100000000_610000000827	0.228129	0.0668683	3.41555
tdT-_210128_Slice3_Cell1_AP001_100000000_610000001626	0.188844	0.0623297	1.37043		tdT+_210127_Slice1_Cell1_AP003_100000000_610000003031	0.140253	0.108811	1.43697			tdT-_210126_Slice1_Cell2_AP002_100000000_610000000841	0.441913	0.239386	3.33254		tdT+_210129_Slice1_Cell1_AP_100000000_610000000878	0.172203	0.116793	3.09313
tdT-_210128_Slice3_Cell1_AP001_100000000_610000001647	0.263798	0.109126	1.73005		tdT+_210127_Slice1_Cell1_AP003_100000000_610000003070	0.151341	0.101545	1.76746			tdT-_210126_Slice1_Cell2_AP002_100000000_610000000904	0.30249	0.117108	2.96645		tdT+_210129_Slice1_Cell1_AP_100000000_610000000941	0.0920654	0.0334307	2.42118
tdT-_210128_Slice3_Cell1_AP001_100000000_610000001681	0.0773168	0.0272243	1.19029		tdT+_210127_Slice1_Cell1_AP003_100000000_610000003115	0.121725	0.0572082	0.899923			tdT-_210126_Slice1_Cell2_AP002_100000000_610000000962	0.118634	0.0574759	1.55968		tdT+_210129_Slice1_Cell1_AP_100000000_610000000992	0.118222	0.0285177	2.11454
tdT-_210128_Slice3_Cell1_AP001_100000000_610000001702	0.0767721	0.034695	0.933344		tdT+_210127_Slice1_Cell1_AP003_100000000_610000005373	0.146139	0.116559	0.720071			tdT-_210126_Slice1_Cell2_AP002_100000000_610000001668	0.0829214	0.0329902	0.553503		tdT+_210129_Slice1_Cell1_AP_100000000_610000001031	0.0765486	0.0434038	1.5934
tdT-_210128_Slice3_Cell1_AP001_100000000_610000001721	0.289633	0.178189	1.63854		tdT+_210127_Slice1_Cell1_AP003_100000000_610000005389	0.153077	0.114734	0.67022			tdT-_210126_Slice1_Cell2_AP002_100000000_610000001679	0.210969	0.0859852	0.985008		tdT+_210129_Slice1_Cell1_AP_100000000_610000001060	0.137923	0.0817166	2.28763
tdT-_210128_Slice3_Cell1_AP001_100000000_610000001753	0.144877	0.0955653	1.06363		tdT+_210127_Slice1_Cell1_AP003_100000000_610000005400	0.0297739	0.0577395	0.341995			tdT-_210126_Slice1_Cell2_AP002_100000000_610000001503	0.310311	0.153302	1.83208		tdT+_210129_Slice1_Cell1_AP_100000000_610000001103	0.0990914	0.0612402	1.47678
tdT-_210128_Slice3_Cell1_AP001_100000000_610000001773	0.355438	0.154441	1.59143		tdT+_210127_Slice1_Cell1_AP003_100000000_610000005420	0.0456058	0.0456048	0.596831			tdT-_210126_Slice1_Cell2_AP002_100000000_610000001538	0.117736	0.0408317	1.32302		tdT+_210129_Slice1_Cell1_AP_100000000_610000001132	0.365649	0.272065	3.16563
tdT-_210128_Slice3_Cell1_AP001_100000000_610000001802	0.185541	0.0996593	0.985419		tdT+_210127_Slice1_Cell1_AP003_100000000_610000005441	0.0386517	0.0364222	0.589195			tdT-_210126_Slice1_Cell2_AP002_100000000_610000001565	0.0540808	0.0332986	0.483674		tdT+_210129_Slice1_Cell1_AP_100000000_610000001195	0.432416	0.295138	3.53652
tdT-_210128_Slice3_Cell1_AP001_100000000_610000001822	0.0188832	0.0152627	0.607937		tdT+_210127_Slice1_Cell1_AP003_100000000_610000005466	0.048856	0.0513241	0.578405			tdT-_210126_Slice1_Cell2_AP002_100000000_610000001570	0.0214576	0.0176923	0.429556		tdT+_210129_Slice1_Cell1_AP_100000000_610000001257	0.299852	0.0391335	3.03033
tdT-_210128_Slice3_Cell1_AP001_100000000_610000001837	0.0515133	0.0290488	0.765385		tdT+_210127_Slice1_Cell1_AP003_100000000_610000005490	0.360058	0.146124	1.34118			tdT-_210126_Slice1_Cell2_AP002_100000000_610000001579	0.113756	0.0284062	0.902039		tdT+_210129_Slice1_Cell1_AP_100000000_610000001318	0.141668	0.0771329	1.86596
tdT-_210128_Slice3_Cell1_AP001_100000000_610000001854	0.225784	0.092444	1.21208		tdT+_210127_Slice1_Cell1_AP003_100000000_610000005520	0.0748684	0.0705405	0.679708			tdT-_210126_Slice1_Cell2_AP002_100000000_610000001599	0.0855789	0.0525279	0.790767		tdT+_210129_Slice1_Cell1_AP_100000000_610000001356	0.112119	0.0875215	1.51641
tdT-_210128_Slice3_Cell1_AP001_100000000_610000001876	0.0893332	0.0342479	0.757241		tdT+_210127_Slice1_Cell1_AP003_100000000_610000005542	0.385506	0.259402	1.25659			tdT-_210126_Slice1_Cell2_AP002_100000000_610000001615	0.0760185	0.0457678	0.49977		tdT+_210129_Slice1_Cell1_AP_100000000_610000001388	0.439809	0.283758	2.64987
tdT-_210128_Slice3_Cell1_AP001_100000000_610000001890	0.0656244	0.0393663	0.753875		tdT+_210127_Slice1_Cell1_AP003_100000000_610000005568	0.077783	0.0655102	0.586898			tdT-_210126_Slice1_Cell2_AP002_100000000_610000001623	0.120384	0.0850192	0.89811		tdT+_210129_Slice1_Cell1_AP_100000000_610000001437	0.108731	0.0444253	1.99865
tdT-_210128_Slice3_Cell1_AP001_100000000_610000001905	0.221464	0.10693	1.16425		tdT+_210127_Slice1_Cell1_AP003_100000000_610000005593	0.0673502	0.0846931	0.589261			tdT-_210126_Slice1_Cell2_AP002_100000000_610000001640	0.0780191	0.0420899	0.495063		tdT+_210129_Slice1_Cell1_AP_100000000_610000001475	0.101382	0.0247284	1.33385
tdT-_210128_Slice3_Cell1_AP001_100000000_610000001923	0.110377	0.0549822	0.857358		tdT+_210127_Slice1_Cell1_AP003_100000000_610000005612	0.0505726	0.0325438	0.780935			tdT-_210126_Slice1_Cell2_AP002_100000000_610000001644	0.0500108	0.0174463	0.704643		tdT+_210129_Slice1_Cell1_AP_100000000_610000001505	0.143469	0.110574	1.80836
tdT-_210128_Slice3_Cell1_AP001_100000000_610000001937	0.16697	0.110575	0.888574		tdT+_210127_Slice1_Cell1_AP003_100000000_610000005630	0.0510941	0.0703363	0.464252			tdT-_210126_Slice1_Cell2_AP002_100000000_610000001659	0.102264	0.047095	0.606695		tdT+_210129_Slice1_Cell1_AP_100000000_610000001542	0.230217	0.0248784	1.94553
tdT-_210128_Slice3_Cell1_AP001_100000000_610000001953	0.053664	0.0303157	0.698907		tdT+_210127_Slice1_Cell1_AP003_100000000_610000004751	0.160989	0.114933	0.750217			tdT-_210126_Slice1_Cell2_AP002_100000000_610000001711	0.0679238	0.0593529	0.372629		tdT+_210129_Slice1_Cell1_AP_100000000_610000001581	0.147697	0.0544235	2.06803
tdT-_210128_Slice3_Cell1_AP001_100000000_610000001965	0.116582	0.0714193	0.76187		tdT+_210127_Slice1_Cell1_AP003_100000000_610000004766	0.132881	0.0862642	0.940696			tdT-_210126_Slice1_Cell2_AP002_100000000_610000001717	0.158486	0.0981966	0.613441		tdT+_210129_Slice1_Cell1_AP_100000000_610000001622	0.243619	0.153715	2.19596
tdT-_210128_Slice3_Cell1_AP001_100000000_610000001978	0.0644899	0.0533678	0.566303		tdT+_210127_Slice1_Cell1_AP003_100000000_610000004784	0.180885	0.110225	1.40143			tdT-_210126_Slice1_Cell2_AP002_100000000_610000001696	0.0459763	0.0204258	0.467675		tdT+_210129_Slice1_Cell1_AP_100000000_610000001666	0.124593	0.0523964	1.73246
tdT-_210128_Slice3_Cell1_AP001_100000000_610000001993	0.182288	0.0875582	0.751658		tdT+_210127_Slice1_Cell1_AP003_100000000_610000004821	0.0542164	0.0490418	0.7383			tdT-_210126_Slice1_Cell2_AP002_100000000_610000001704	0.066102	0.0542957	0.483146		tdT+_210129_Slice1_Cell1_AP_100000000_610000001700	0.0248516	0.020943	0.841926
tdT-_210128_Slice3_Cell1_AP001_100000000_610000001998	0.292035	0.137522	0.998181		tdT+_210127_Slice1_Cell1_AP003_100000000_610000004849	0.0681563	0.0475622	0.812673			tdT-_210126_Slice1_Cell2_AP002_100000000_610000001723	0.0259407	0.020912	0.311221		tdT+_210129_Slice1_Cell1_AP_100000000_610000001747	0.138567	0.117141	1.40976
tdT-_210128_Slice3_Cell1_AP001_100000000_610000002016	0.28692	0.118291	0.966044		tdT+_210127_Slice1_Cell1_AP003_100000000_610000004875	0.54879	0.138895	1.76505			tdT-_210126_Slice1_Cell2_AP003_100000000_610000002353	0.149715	0.116703	0.998096		tdT+_210129_Slice1_Cell1_AP_100000000_610000001771	0.16185	0.103147	1.94679
tdT-_210128_Slice3_Cell1_AP001_100000000_610000002031	0.143319	0.105825	0.829279		tdT+_210127_Slice1_Cell1_AP003_100000000_610000004912	0.395594	0.188338	1.55506			tdT-_210126_Slice1_Cell2_AP003_100000000_610000002381	0.0950713	0.0739652	0.919842		tdT+_210129_Slice1_Cell1_AP_100000000_610000001812	0.161244	0.0492349	1.75815
tdT-_210128_Slice3_Cell1_AP001_100000000_610000002045	0.0740401	0.0259132	0.469166		tdT+_210127_Slice1_Cell1_AP003_100000000_610000004949	0.157453	0.131905	1.28469			tdT-_210126_Slice1_Cell2_AP003_100000000_610000002550	0.140417	0.0832184	0.959987		tdT+_210129_Slice1_Cell1_AP_100000000_610000001847	0.20022	0.103358	2.10527
tdT-_210128_Slice3_Cell1_AP001_100000000_610000002051	0.222631	0.122932	0.938923		tdT+_210127_Slice1_Cell1_AP003_100000000_610000004979	0.496096	0.102158	1.71118			tdT-_210126_Slice1_Cell2_AP003_100000000_610000002579	0.0598662	0.0669106	0.560563		tdT+_210129_Slice1_Cell1_AP_100000000_610000001887	0.452128	0.0511842	2.81064
tdT-_210128_Slice3_Cell1_AP001_100000000_610000002068	0.109161	0.0653578	0.70962		tdT+_210127_Slice1_Cell1_AP003_100000000_610000005014	0.138177	0.114406	0.901153			tdT-_210126_Slice1_Cell2_AP003_100000000_610000002598	0.177885	0.0928155	0.850901		tdT+_210129_Slice1_Cell1_AP_100000000_610000001943	0.204901	0.0945829	1.80299
tdT-_210128_Slice3_Cell1_AP001_100000000_610000002083	0.325898	0.141067	0.995097		tdT+_210127_Slice1_Cell1_AP003_100000000_610000005031	0.150154	0.0644675	1.12834			tdT-_210126_Slice1_Cell2_AP003_100000000_610000002626	0.107721	0.0871219	0.76653		tdT+_210129_Slice1_Cell1_AP_100000000_610000001980	0.104466	0.0271783	1.27104
tdT-_210128_Slice3_Cell1_AP001_100000000_610000002099	0.159918	0.082341	0.689983		tdT+_210127_Slice1_Cell1_AP003_100000000_610000005062	0.219004	0.18438	1.13076			tdT-_210126_Slice1_Cell2_AP003_100000000_610000002644	0.107594	0.0643204	0.849782		tdT+_210129_Slice1_Cell1_AP_100000000_610000002008	0.0778877	0.0586764	1.04832
tdT-_210128_Slice3_Cell1_AP001_100000000_610000002109	0.208633	0.0718639	0.762457		tdT+_210127_Slice1_Cell1_AP003_100000000_610000005081	0.0397996	0.0666368	0.506946			tdT-_210126_Slice1_Cell2_AP003_100000000_610000002671	0.0943899	0.0640428	0.778497		tdT+_210129_Slice1_Cell1_AP_100000000_610000002031	0.049787	0.0436287	0.972323
tdT-_210128_Slice3_Cell1_AP001_100000000_610000002120	0.0627593	0.0717108	0.333549		tdT+_210127_Slice1_Cell1_AP003_100000000_610000005094	0.224648	0.115497	1.33749			tdT-_210126_Slice1_Cell2_AP003_100000000_610000002691	0.120924	0.104772	0.708113		tdT+_210129_Slice1_Cell1_AP_100000000_610000002053	0.0525034	0.0384531	0.952847
tdT-_210128_Slice3_Cell1_AP002_100000000_610000001089	0.384768	0.183039	4.82959		tdT+_210127_Slice1_Cell1_AP003_100000000_610000005121	0.0388472	0.0457289	0.441103			tdT-_210126_Slice1_Cell2_AP003_100000000_610000002712	0.0708805	0.0903783	0.563113		tdT+_210129_Slice1_Cell1_AP_100000000_610000002073	0.811606	0.396014	2.85231
tdT-_210128_Slice3_Cell1_AP002_100000000_610000001175	0.240321	0.0923568	2.72047		tdT+_210127_Slice1_Cell1_AP003_100000000_610000005136	0.219509	0.13417	1.12745			tdT-_210126_Slice1_Cell2_AP003_100000000_610000002410	0.0568767	0.0541889	0.609584		tdT+_210129_Slice1_Cell1_AP_100000000_610000002125	0.136171	0.0796157	1.32672
tdT-_210128_Slice3_Cell1_AP002_100000000_610000001225	0.0752098	0.0355198	1.85878		tdT+_210127_Slice1_Cell1_AP003_100000000_610000005899	0.233322	0.36869	0.90694			tdT-_210126_Slice1_Cell2_AP003_100000000_610000002433	0.11905	0.0968016	0.939355		tdT+_210129_Slice1_Cell1_AP_100000000_610000002154	0.0969596	0.019862	1.19417
tdT-_210128_Slice3_Cell1_AP002_100000000_610000001260	0.227086	0.0393011	2.99188		tdT+_210127_Slice1_Cell1_AP003_100000000_610000005920	0.0343181	0.0677884	0.345224			tdT-_210126_Slice1_Cell2_AP003_100000000_610000002463	0.0849721	0.0712756	0.871684		tdT+_210129_Slice1_Cell1_AP_100000000_610000002182	0.294645	0.0353187	1.23127
tdT-_210128_Slice3_Cell1_AP002_100000000_610000001313	0.0369326	0.0200848	1.14441		tdT+_210127_Slice1_Cell1_AP003_100000000_610000005938	0.0558955	0.098399	0.563048			tdT-_210126_Slice1_Cell2_AP003_100000000_610000002491	0.0875812	0.0618376	0.914938		tdT+_210129_Slice1_Cell1_AP_100000000_610000002212	0.302479	0.116297	1.6873
tdT-_210128_Slice3_Cell1_AP002_100000000_610000001336	0.318413	0.0411293	2.00414		tdT+_210127_Slice1_Cell1_AP003_100000000_610000005956	0.0351882	0.0888118	0.306257			tdT-_210126_Slice1_Cell2_AP003_100000000_610000002519	0.0732607	0.0259747	1.16537		tdT+_210129_Slice1_Cell1_AP_100000000_610000002243	0.188209	0.11694	1.18339
tdT-_210128_Slice3_Cell1_AP002_100000000_610000001373	0.15143	0.0829784	1.74191		tdT+_210127_Slice1_Cell1_AP003_100000000_610000005260	0.0336871	0.0474301	0.453413			tdT-_210126_Slice1_Cell2_AP003_100000000_610000002123	0.061945	0.0351638	0.906832		tdT+_210129_Slice1_Cell1_AP_100000000_610000002265	0.0216053	0.0196188	0.651484
tdT-_210128_Slice3_Cell1_AP002_100000000_610000001403	0.23203	0.169019	2.00733		tdT+_210127_Slice1_Cell1_AP003_100000000_610000005280	0.10966	0.0595001	0.632894			tdT-_210126_Slice1_Cell2_AP003_100000000_610000002153	0.105894	0.0517551	1.39839		tdT+_210129_Slice1_Cell1_AP_100000000_610000002285	0.0704755	0.0271213	0.918397
tdT-_210128_Slice3_Cell1_AP002_100000000_610000001438	0.0827101	0.0400174	1.47932		tdT+_210127_Slice1_Cell1_AP003_100000000_610000005290	0.0232672	0.0335952	0.263914			tdT-_210126_Slice1_Cell2_AP003_100000000_610000002187	0.0204483	0.0185063	0.574239		tdT+_210129_Slice1_Cell1_AP_100000000_610000002310	0.422277	0.232963	2.00077
tdT-_210128_Slice3_Cell1_AP002_100000000_610000001465	0.228609	0.113253	2.10798		tdT+_210127_Slice1_Cell1_AP003_100000000_610000005297	0.0418043	0.0702419	0.533503			tdT-_210126_Slice1_Cell2_AP003_100000000_610000002211	0.0806423	0.0398359	1.31518		tdT+_210129_Slice1_Cell1_AP_100000000_610000002348	0.0864366	0.0302556	0.927257
tdT-_210128_Slice3_Cell1_AP002_100000000_610000001504	0.177696	0.0710758	1.87709		tdT+_210127_Slice1_Cell1_AP003_100000000_610000005314	0.287348	0.136629	1.03507			tdT-_210126_Slice1_Cell2_AP003_100000000_610000002247	0.381437	0.220004	1.72492		tdT+_210129_Slice1_Cell1_AP_100000000_610000002366	0.11843	0.0401005	1.17373
tdT-_210128_Slice3_Cell1_AP002_100000000_610000001541	0.0779008	0.0420808	1.17556		tdT+_210127_Slice1_Cell1_AP003_100000000_610000005339	0.200512	0.144369	0.717576			tdT-_210126_Slice1_Cell2_AP003_100000000_610000002285	0.157331	0.053449	1.31312		tdT+_210129_Slice1_Cell1_AP_100000000_610000002391	0.0727171	0.0511413	0.885888
tdT-_210128_Slice3_Cell1_AP002_100000000_610000001553	0.119157	0.0835877	1.2302		tdT+_210127_Slice1_Cell1_AP003_100000000_610000005348	0.211642	0.199598	1.02268			tdT-_210126_Slice1_Cell2_AP003_100000000_610000002322	0.134641	0.0656791	1.29134		tdT+_210129_Slice1_Cell1_AP_100000000_610000002409	0.213894	0.0699361	1.34416
tdT-_210128_Slice3_Cell1_AP002_100000000_610000001575	0.137332	0.0492258	1.6892		tdT+_210127_Slice1_Cell1_AP003_100000000_610000005652	0.178387	0.171394	0.862634			tdT-_210126_Slice1_Cell2_AP003_100000000_610000000461	0.137394	0.0345948	3.64735		tdT+_210129_Slice1_Cell1_AP_100000000_610000002435	0.170972	0.122179	1.07298
tdT-_210128_Slice3_Cell1_AP002_100000000_610000001599	0.178289	0.0557024	2.00325		tdT+_210127_Slice1_Cell1_AP003_100000000_610000005676	0.0334326	0.0632119	0.539652			tdT-_210126_Slice1_Cell2_AP003_100000000_610000000535	0.0464728	0.0305277	2.83218		tdT+_210129_Slice1_Cell1_AP_100000000_610000002473	0.0691943	0.031584	0.796524
tdT-_210128_Slice3_Cell1_AP002_100000000_610000001635	0.102005	0.0879426	0.989753		tdT+_210127_Slice1_Cell1_AP003_100000000_610000005697	0.1309	0.17991	0.593172			tdT-_210126_Slice1_Cell2_AP003_100000000_610000000579	0.240588	0.0693996	4.31795		tdT+_210129_Slice1_Cell1_AP_100000000_610000002490	0.0753579	0.050163	0.969575
tdT-_210128_Slice3_Cell1_AP002_100000000_610000001652	0.434159	0.204326	2.83086		tdT+_210127_Slice1_Cell1_AP003_100000000_610000005708	0.0278078	0.029084	0.457625			tdT-_210126_Slice1_Cell2_AP003_100000000_610000000671	0.0464895	0.0356122	1.89479		tdT+_210129_Slice1_Cell1_AP_100000000_610000002509	0.0618217	0.0229929	0.801982
tdT-_210128_Slice3_Cell1_AP002_100000000_610000001704	0.136014	0.0367623	1.07048		tdT+_210127_Slice1_Cell1_AP003_100000000_610000005729	0.0585998	0.0833503	0.545402			tdT-_210126_Slice1_Cell2_AP003_100000000_610000000722	0.178485	0.0734006	3.87411		tdT+_210129_Slice1_Cell1_AP_100000000_610000002532	0.110196	0.046071	1.11412
tdT-_210128_Slice3_Cell1_AP002_100000000_610000001726	0.0886184	0.0621786	1.06782		tdT+_210127_Slice1_Cell1_AP003_100000000_610000005751	0.0488489	0.0344073	0.518965			tdT-_210126_Slice1_Cell2_AP003_100000000_610000000810	0.034551	0.0186169	1.97862		tdT+_210129_Slice1_Cell1_AP_100000000_610000002555	0.0368107	0.0276702	0.640267
tdT-_210128_Slice3_Cell1_AP002_100000000_610000001747	0.145227	0.0791644	1.40976		tdT+_210127_Slice1_Cell1_AP003_100000000_610000005764	0.0904775	0.075668	0.615368			tdT-_210126_Slice1_Cell2_AP003_100000000_610000000848	0.191446	0.0414145	3.4017		tdT+_210129_Slice1_Cell1_AP_100000000_610000002571	0.0923754	0.055039	0.70675
tdT-_210128_Slice3_Cell1_AP002_100000000_610000001772	0.378334	0.255974	1.88221		tdT+_210127_Slice1_Cell1_AP003_100000000_610000005777	0.0589058	0.0813488	0.56648			tdT-_210126_Slice1_Cell2_AP003_100000000_610000000926	0.0395668	0.0354543	1.33393		tdT+_210129_Slice1_Cell1_AP_100000000_610000002584	0.152768	0.101127	1.01608
tdT-_210128_Slice3_Cell1_AP002_100000000_610000001806	0.08439	0.0459921	1.13578		tdT+_210127_Slice1_Cell1_AP003_100000000_610000005799	0.0708142	0.088212	0.400861			tdT-_210126_Slice1_Cell2_AP003_100000000_610000000962	0.140049	0.041826	2.55111		tdT+_210129_Slice1_Cell1_AP_100000000_610000002603	0.0829882	0.044556	0.761829
tdT-_210128_Slice3_Cell1_AP002_100000000_610000001822	0.0813786	0.0230928	1.2883		tdT+_210127_Slice1_Cell1_AP003_100000000_610000005806	0.0197001	0.0371425	0.272021			tdT-_210126_Slice1_Cell2_AP003_100000000_610000001021	0.385049	0.27063	3.74475		tdT+_210129_Slice1_Cell1_AP_100000000_610000002622	0.382582	0.0906062	1.55248
tdT-_210128_Slice3_Cell1_AP002_100000000_610000001843	0.143927	0.0852975	1.75056		tdT+_210127_Slice1_Cell1_AP003_100000000_610000005817	0.051174	0.0752375	0.333681			tdT-_210126_Slice1_Cell2_AP003_100000000_610000001097	0.0408631	0.0279633	1.43708		tdT+_210129_Slice1_Cell1_AP_100000000_610000002651	0.167202	0.10865	1.08415
tdT-_210128_Slice3_Cell1_AP002_100000000_610000001874	0.0653747	0.0485556	0.927794		tdT+_210127_Slice1_Cell1_AP003_100000000_610000005823	0.157093	0.161604	0.616651			tdT-_210126_Slice1_Cell2_AP003_100000000_610000001139	0.169948	0.0779456	3.48357		tdT+_210129_Slice1_Cell1_AP_100000000_610000002677	0.111435	0.0703029	0.707611
tdT-_210128_Slice3_Cell1_AP002_100000000_610000001891	0.0422085	0.00958666	0.634078		tdT+_210127_Slice1_Cell1_AP003_100000000_610000005835	0.0868386	0.172634	0.62286			tdT-_210126_Slice1_Cell2_AP003_100000000_610000001217	0.0785528	0.0372258	1.86541		tdT+_210129_Slice1_Cell1_AP_100000000_610000002691	0.146757	0.100544	0.74582
tdT-_210128_Slice3_Cell1_AP002_100000000_610000001893	0.149363	0.0475089	1.47111		tdT+_210127_Slice1_Cell1_AP003_100000000_610000005850	0.0688954	0.110979	0.564359			tdT-_210126_Slice1_Cell2_AP003_100000000_610000001262	0.265703	0.0515357	3.5308		tdT+_210129_Slice1_Cell1_AP_100000000_610000002707	0.0465844	0.0279633	0.677348
tdT-_210128_Slice3_Cell1_AP002_100000000_610000001924	0.102006	0.0461382	1.24696		tdT+_210127_Slice1_Cell1_AP003_100000000_610000005870	0.138067	0.156642	0.669468			tdT-_210126_Slice1_Cell2_AP003_100000000_610000001341	0.0730004	0.0289918	1.78144		tdT+_210129_Slice1_Cell1_AP_100000000_610000002727	0.044365	0.0251485	0.598657
tdT-_210128_Slice3_Cell1_AP002_100000000_610000001950	0.106535	0.0459437	1.03854		tdT+_210127_Slice1_Cell1_AP003_100000000_610000005882	0.104524	0.126467	0.578709			tdT-_210126_Slice1_Cell2_AP003_100000000_610000002732	0.0754485	0.150132	0.57539		tdT+_210129_Slice1_Cell1_AP_100000000_610000002741	0.371806	0.151401	1.14597
tdT-_210128_Slice3_Cell1_AP002_100000000_610000001971	0.0851141	0.0338795	1.17541		tdT+_210127_Slice1_Cell1_AP003_100000000_610000005975	0.0661412	0.0865325	0.615081			tdT-_210126_Slice1_Cell2_AP003_100000000_610000001414	0.174247	0.0420953	1.87589		tdT+_210129_Slice1_Cell1_AP_100000000_610000002766	0.299091	0.0988959	0.991496
tdT-_210128_Slice3_Cell1_AP002_100000000_610000001994	0.243631	0.145763	1.80942		tdT+_210127_Slice1_Cell1_AP003_100000000_610000005993	0.588793	0.117924	0.116292			tdT-_210126_Slice1_Cell2_AP003_100000000_610000001457	0.152558	0.0281868	2.02968		tdT+_210129_Slice1_Cell1_AP_100000000_610000002782	0.158343	0.091267	1.0012
tdT-_210128_Slice3_Cell1_AP002_100000000_610000002029	0.105222	0.0434445	1.00817		tdT+_210127_Slice1_Cell1_AP003_100000000_610000005998	0.127292	0.1476	0.561469			tdT-_210126_Slice1_Cell2_AP003_100000000_610000001510	0.00437276	0.00401792	0.519868		tdT+_210129_Slice1_Cell1_AP_100000000_610000002805	0.0473087	0.0296142	0.637966
tdT-_210128_Slice3_Cell1_AP002_100000000_610000002038	0.0350289	0.0300909	0.67913		tdT+_210127_Slice1_Cell1_AP003_100000000_610000006016	0.0760888	0.131846	0.578438			tdT-_210126_Slice1_Cell2_AP003_100000000_610000001534	0.244193	0.167124	2.41677		tdT+_210129_Slice1_Cell1_AP_100000000_610000002822	0.407424	0.210054	1.27515
tdT-_210128_Slice3_Cell1_AP002_100000000_610000002050	0.266593	0.151506	1.81574		tdT+_210127_Slice1_Cell2_AP_100000000_610000002383	0.157695	0.0835542	1.84573			tdT-_210126_Slice1_Cell2_AP003_100000000_610000001591	0.142849	0.0937927	1.98381		tdT+_210129_Slice1_Cell1_AP_100000000_610000002841	0.126291	0.101373	0.850132
tdT-_210128_Slice3_Cell1_AP002_100000000_610000002086	0.22038	0.108445	1.41254		tdT+_210127_Slice1_Cell2_AP_100000000_610000002356	0.0648983	0.0366637	1.14942			tdT-_210126_Slice1_Cell2_AP003_100000000_610000001639	0.0523884	0.0339513	0.56338		tdT+_210129_Slice1_Cell1_AP_100000000_610000002863	0.167314	0.0955703	0.84592
tdT-_210128_Slice3_Cell1_AP002_100000000_610000002109	0.0439387	0.0256359	0.762588		tdT+_210127_Slice1_Cell2_AP_100000000_610000003162	0.013946	0.0219988	0.318022			tdT-_210126_Slice1_Cell2_AP003_100000000_610000001652	0.0260748	0.0177005	1.00181		tdT+_210129_Slice1_Cell1_AP_100000000_610000002883	0.161992	0.0790032	0.915227
tdT-_210128_Slice3_Cell1_AP002_100000000_610000002124	0.0703282	0.0478768	0.76233		tdT+_210127_Slice1_Cell2_AP_100000000_610000002429	0.32893	0.241246	1.94198			tdT-_210126_Slice1_Cell2_AP003_100000000_610000001683	0.197189	0.103592	2.55874		tdT+_210129_Slice1_Cell1_AP_100000000_610000002903	0.082993	0.05161	0.462499
tdT-_210128_Slice3_Cell1_AP002_100000000_610000002133	0.268148	0.115459	1.67169		tdT+_210127_Slice1_Cell2_AP_100000000_610000003211	0.0125613	0.0246343	0.253944			tdT-_210126_Slice1_Cell2_AP003_100000000_610000001747	0.0858564	0.0278238	1.28502		tdT+_210129_Slice1_Cell1_AP_100000000_610000002914	0.104515	0.0716209	0.602868
tdT-_210128_Slice3_Cell1_AP002_100000000_610000002167	0.0701639	0.0472897	0.834449		tdT+_210127_Slice1_Cell2_AP_100000000_610000002477	0.263433	0.186626	1.76252			tdT-_210126_Slice1_Cell2_AP003_100000000_610000001782	0.0328584	0.0256152	1.0023		tdT+_210129_Slice1_Cell1_AP_100000000_610000002923	0.246456	0.104431	0.981619
tdT-_210128_Slice3_Cell1_AP002_100000000_610000002182	0.259791	0.129129	1.26706		tdT+_210127_Slice1_Cell2_AP_100000000_610000002523	0.0467004	0.0307045	1.08047			tdT-_210126_Slice1_Cell2_AP003_100000000_610000001814	0.161246	0.0809288	2.44371		tdT+_210129_Slice1_Cell1_AP_100000000_610000002938	0.328293	0.207172	0.779566
tdT-_210128_Slice3_Cell1_AP002_100000000_610000002204	0.04801	0.0211502	0.919657		tdT+_210127_Slice1_Cell2_AP_100000000_610000003185	0.130123	0.0995043	1.03105			tdT-_210126_Slice1_Cell2_AP003_100000000_610000001871	0.123649	0.065812	1.90899		tdT+_210129_Slice1_Cell1_AP_100000000_610000002949	0.2702	0.138357	0.826902
tdT-_210128_Slice3_Cell1_AP002_100000000_610000002223	0.16429	0.075208	1.0509		tdT+_210127_Slice1_Cell2_AP_100000000_610000002587	0.0388124	0.0353402	0.883492			tdT-_210126_Slice1_Cell2_AP003_100000000_610000001917	0.26066	0.156934	2.58548		tdT+_210129_Slice1_Cell1_AP_100000000_610000002964	0.0606835	0.034282	0.583868
tdT-_210128_Slice3_Cell1_AP002_100000000_610000002236	0.0495602	0.0266256	0.689679		tdT+_210127_Slice1_Cell2_AP_100000000_610000002617	0.110677	0.0931035	0.941367			tdT-_210126_Slice1_Cell2_AP003_100000000_610000001976	0.100442	0.0577518	1.11061		tdT+_210129_Slice1_Cell1_AP_100000000_610000002978	0.239156	0.105216	0.943887
tdT-_210128_Slice3_Cell1_AP002_100000000_610000002248	0.0403276	0.0266993	0.627047		tdT+_210127_Slice1_Cell2_AP_100000000_610000002636	0.112388	0.0460064	1.24167			tdT-_210126_Slice1_Cell2_AP003_100000000_610000002002	0.0312782	0.0193401	0.868364		tdT+_210129_Slice1_Cell1_AP_100000000_610000002991	0.0446029	0.0295401	0.513017
tdT-_210128_Slice3_Cell1_AP002_100000000_610000002258	0.178432	0.0645522	1.23828		tdT+_210127_Slice1_Cell2_AP_100000000_610000002557	0.0884333	0.0761138	1.22679			tdT-_210126_Slice1_Cell2_AP003_100000000_610000002027	0.24323	0.047871	1.67208		tdT+_210129_Slice1_Cell1_AP_100000000_610000003006	0.0840788	0.0555334	0.672608
tdT-_210128_Slice3_Cell1_AP002_100000000_610000002276	0.058993	0.0302949	0.553056		tdT+_210127_Slice1_Cell2_AP_100000000_610000002215	0.24972	0.0488482	1.97886			tdT-_210126_Slice1_Cell2_AP003_100000000_610000002070	0.0196659	0.0185063	0.651565		tdT+_210129_Slice1_Cell1_AP_100000000_610000003021	0.114533	0.0893045	0.539822
tdT-_210128_Slice3_Cell1_AP002_100000000_610000002280	0.176862	0.0507134	1.11489		tdT+_210127_Slice1_Cell2_AP_100000000_610000002259	0.0622579	0.027115	1.2741			tdT-_210126_Slice1_Cell2_AP003_100000000_610000002093	0.0485111	0.0253443	0.957843		tdT+_210129_Slice1_Cell1_AP_100000000_610000003032	0.121645	0.0932023	0.579662
tdT-_210128_Slice3_Cell1_AP002_100000000_610000002300	0.191781	0.0837722	1.22415		tdT+_210127_Slice1_Cell2_AP_100000000_610000002291	0.0818704	0.0363509	1.43812			tdT-_210126_Slice1_Cell2_AP003_100000000_610000000345	0.339359	0.206752	4.30998		tdT+_210129_Slice1_Cell1_AP_100000000_610000003045	0.198445	0.149563	0.724458
tdT-_210128_Slice3_Cell1_AP002_100000000_610000002320	0.36666	0.127782	1.10273		tdT+_210127_Slice1_Cell2_AP_100000000_610000002331	0.0283347	0.0243625	0.764207			tdT-_210126_Slice1_Cell2_AP003_100000000_610000000420	0.0683411	0.0472838	2.87393		tdT+_210129_Slice1_Cell1_AP_100000000_610000003058	0.127053	0.0695259	0.69766
tdT-_210128_Slice3_Cell1_AP002_100000000_610000002332	0.13056	0.0352393	0.979506		tdT+_210127_Slice1_Cell2_AP_100000000_610000003437	0.113081	0.0775819	1.0423			tdT-_210126_Slice1_Cell2_AP003_100000000_610000000232	0.129066	0.0533485	3.99323		tdT+_210129_Slice1_Cell1_AP_100000000_610000003071	0.159054	0.0622108	0.771365
tdT-_210128_Slice3_Cell1_AP002_100000000_610000002346	0.0626808	0.0249451	0.832719		tdT+_210127_Slice1_Cell2_AP_100000000_610000003465	0.0113026	0.03431	0.298921			tdT-_210126_Slice1_Cell2_AP003_100000000_610000000284	0.105929	0.0234594	3.33743		tdT+_210129_Slice1_Cell1_AP_100000000_610000003086	0.160545	0.070557	0.742924
tdT-_210128_Slice3_Cell1_AP002_100000000_610000002362	0.221145	0.145083	1.20001		tdT+_210127_Slice1_Cell2_AP_100000000_610000003479	0.0294383	0.0223591	0.77481			tdT-_210126_Slice1_Cell2_AP003_100000000_610000001387	0.0462228	0.0370181	1.056		tdT+_210129_Slice1_Cell1_AP_100000000_610000003095	0.0422335	0.0510258	0.343134
tdT-_210128_Slice3_Cell1_AP002_100000000_610000002384	0.132645	0.0533102	0.826258		tdT+_210127_Slice1_Cell2_AP_100000000_610000003506	0.150494	0.119958	0.913643			tdT-_210126_Slice3_Cell1_AP001_100000000_610000001167	0.248556	0.156174	2.79776		tdT+_210129_Slice1_Cell1_AP_100000000_610000003105	0.113124	0.168721	0.462741
tdT-_210128_Slice3_Cell1_AP002_100000000_610000002394	0.0395982	0.0213672	0.70501		tdT+_210127_Slice1_Cell2_AP_100000000_610000003532	0.101294	0.0812574	0.970834			tdT-_210126_Slice3_Cell1_AP001_100000000_610000001222	0.176966	0.127635	2.20845		tdT+_210129_Slice1_Cell1_AP_100000000_610000003113	0.107934	0.104142	0.502884
tdT-_210128_Slice3_Cell1_AP002_100000000_610000002409	0.0950434	0.0633884	0.623564		tdT+_210127_Slice1_Cell2_AP_100000000_610000003560	0.08727	0.0415811	0.784827			tdT-_210126_Slice3_Cell1_AP001_100000000_610000000372	0.2233	0.0932514	4.38808		tdT+_210129_Slice1_Cell1_AP_100000000_610000003122	0.103642	0.0639709	0.46767
tdT-_210128_Slice3_Cell1_AP002_100000000_610000002418	0.137678	0.061739	1.13067		tdT+_210127_Slice1_Cell2_AP_100000000_610000003582	0.165009	0.107562	0.827211			tdT-_210126_Slice3_Cell1_AP001_100000000_610000000451	0.194513	0.0747909	3.50279		tdT+_210129_Slice1_Cell1_AP_100000000_610000003127	0.0576789	0.0790195	0.388065
tdT-_210128_Slice3_Cell1_AP002_100000000_610000002441	0.0734055	0.0438854	0.634083		tdT+_210127_Slice1_Cell2_AP_100000000_610000003606	0.023383	0.0355084	0.56264			tdT-_210126_Slice3_Cell1_AP001_100000000_610000000768	0.247805	0.103949	3.23012		tdT+_210129_Slice1_Cell1_AP_100000000_610000003131	0.0335981	0.0426534	0.330186
tdT-_210128_Slice3_Cell1_AP002_100000000_610000002449	0.0690339	0.0249437	0.599888		tdT+_210127_Slice1_Cell2_AP_100000000_610000003625	0.0405856	0.0431459	0.488378			tdT-_210126_Slice3_Cell1_AP001_100000000_610000001044	0.121416	0.0934925	2.49686		tdT+_210129_Slice1_Cell1_AP_100000000_610000003139	0.0772243	0.0421815	0.563677
tdT-_210128_Slice3_Cell1_AP002_100000000_610000002460	0.155658	0.0528334	1.11548		tdT+_210127_Slice1_Cell2_AP_100000000_610000002673	0.0365375	0.0334758	0.741122			tdT-_210126_Slice3_Cell1_AP001_100000000_610000001095	0.0376154	0.0290858	1.77686		tdT+_210129_Slice1_Cell1_AP_100000000_610000003154	0.0559521	0.085786	0.476836
tdT-_210128_Slice3_Cell1_AP002_100000000_610000002480	0.124953	0.0483327	1.01189		tdT+_210127_Slice1_Cell2_AP_100000000_610000002696	0.0390908	0.0382738	0.616709			tdT-_210126_Slice3_Cell1_AP001_100000000_610000001135	0.0999732	0.0860152	1.51253		tdT+_210129_Slice1_Cell1_AP_100000000_610000003167	0.0487119	0.0593931	0.359231
tdT-_210128_Slice3_Cell1_AP002_100000000_610000002497	0.054528	0.0204549	0.558077		tdT+_210127_Slice1_Cell2_AP_100000000_610000002719	0.0222484	0.0217217	0.597651			tdT-_210126_Slice3_Cell1_AP001_100000000_610000002113	0.121805	0.0730944	1.0855		tdT+_210129_Slice1_Cell1_AP_100000000_610000003177	0.0453425	0.0333916	0.385222
tdT-_210128_Slice3_Cell1_AP002_100000000_610000002508	0.294804	0.139417	0.822969		tdT+_210127_Slice1_Cell2_AP_100000000_610000002744	0.137353	0.120904	1.17218			tdT-_210126_Slice3_Cell1_AP001_100000000_610000002132	0.072201	0.038309	0.670568		tdT+_210129_Slice1_Cell1_AP_100000000_610000003183	0.0388133	0.049861	0.459005
tdT-_210128_Slice3_Cell1_AP002_100000000_610000002518	0.156798	0.07564	0.737623		tdT+_210127_Slice1_Cell2_AP_100000000_610000002773	0.0527233	0.0407827	0.967988			tdT-_210126_Slice3_Cell1_AP001_100000000_610000001265	0.12491	0.0719396	2.05		tdT+_210129_Slice1_Cell1_AP_100000000_610000003194	0.031244	0.0413058	0.284072
tdT-_210128_Slice3_Cell1_AP002_100000000_610000002527	0.272207	0.174961	0.911138		tdT+_210127_Slice1_Cell2_AP_100000000_610000002801	0.024617	0.0216721	0.748492			tdT-_210126_Slice3_Cell1_AP001_100000000_610000001305	0.0940927	0.032879	1.93069		tdT+_210129_Slice1_Cell1_AP_100000000_610000003200	0.0371808	0.025348	0.302573
tdT-_210128_Slice3_Cell1_AP002_100000000_610000002535	0.222546	0.135498	0.981959		tdT+_210127_Slice1_Cell2_AP_100000000_610000002821	0.0920637	0.0810296	0.909401			tdT-_210126_Slice3_Cell1_AP001_100000000_610000001340	0.0862999	0.0508116	2.20361		tdT+_210129_Slice1_Cell1_AP_100000000_610000003203	0.0310402	0.0392164	0.280423
tdT-_210128_Slice3_Cell1_AP002_100000000_610000002552	0.129395	0.079108	0.539774		tdT+_210127_Slice1_Cell2_AP_100000000_610000002850	0.110929	0.078285	1.20689			tdT-_210126_Slice3_Cell1_AP001_100000000_610000001386	0.309541	0.244605	2.74193		tdT+_210129_Slice1_Cell1_AP_100000000_610000003208	0.0740806	0.0869758	0.361772
tdT-_210128_Slice3_Cell1_AP002_100000000_610000002559	0.0823082	0.0395642	0.797748		tdT+_210127_Slice1_Cell2_AP_100000000_610000002886	0.349936	0.176764	1.56007			tdT-_210126_Slice3_Cell1_AP001_100000000_610000001433	0.250446	0.0382528	2.61453		tdT+_210129_Slice1_Cell1_AP_100000000_610000003213	0.0907609	0.101147	0.428342
tdT-_210128_Slice3_Cell1_AP002_100000000_610000002575	0.185975	0.0920025	0.799018		tdT+_210127_Slice1_Cell2_AP_100000000_610000002920	0.118764	0.10176	1.09843			tdT-_210126_Slice3_Cell1_AP001_100000000_610000002215	0.187893	0.110729	0.892089		tdT+_210129_Slice1_Cell1_AP_100000000_610000003221	0.0240812	0.028477	0.322069
tdT-_210128_Slice3_Cell1_AP002_100000000_610000002590	0.0880786	0.0444811	0.697895		tdT+_210127_Slice1_Cell2_AP_100000000_610000002951	0.0183961	0.0223963	0.430229			tdT-_210126_Slice3_Cell1_AP001_100000000_610000002223	0.140464	0.0674197	0.950267		tdT+_210129_Slice1_Cell1_AP_100000000_610000003229	0.0322811	0.0453472	0.291339
tdT-_210128_Slice3_Cell1_AP002_100000000_610000002604	0.0880156	0.0367131	0.612614		tdT+_210127_Slice1_Cell2_AP_100000000_610000002967	0.028224	0.0263566	0.574113			tdT-_210126_Slice3_Cell1_AP001_100000000_610000002242	0.150233	0.0734738	1.17021		tdT+_210129_Slice1_Cell1_AP001_100000000_610000000349	0.100755	0.0761078	3.11948
tdT-_210128_Slice3_Cell1_AP002_100000000_610000002615	0.105638	0.0382567	0.696862		tdT+_210127_Slice1_Cell2_AP_100000000_610000002991	0.0566528	0.0238185	1.12032			tdT-_210126_Slice3_Cell1_AP001_100000000_610000002265	0.180551	0.0672657	0.844497		tdT+_210129_Slice1_Cell1_AP001_100000000_610000000411	0.503618	0.247709	4.88723
tdT-_210128_Slice3_Cell1_AP002_100000000_610000002627	0.0522027	0.0188465	0.442089		tdT+_210127_Slice1_Cell2_AP_100000000_610000003020	0.0525644	0.0577129	0.62673			tdT-_210126_Slice3_Cell1_AP001_100000000_610000002276	0.441945	0.206165	1.3831		tdT+_210129_Slice1_Cell1_AP001_100000000_610000000505	0.0828767	0.041944	2.38851
tdT-_210128_Slice3_Cell1_AP002_100000000_610000002634	0.158005	0.0751158	0.950321		tdT+_210127_Slice1_Cell2_AP_100000000_610000003045	0.0597813	0.0416811	1.17739			tdT-_210126_Slice3_Cell1_AP001_100000000_610000002299	0.101664	0.0591312	0.934072		tdT+_210129_Slice1_Cell1_AP001_100000000_610000000612	0.0826508	0.0303315	1.65729
tdT-_210128_Slice3_Cell1_AP002_100000000_610000002650	0.0668114	0.0422422	0.609735		tdT+_210127_Slice1_Cell2_AP_100000000_610000003074	0.597952	0.350016	1.9901			tdT-_210126_Slice3_Cell1_AP001_100000000_610000002317	0.292798	0.184541	0.97962		tdT+_210129_Slice1_Cell1_AP001_100000000_610000001152	0.0327908	0.0243971	1.56687
tdT-_210128_Slice3_Cell1_AP002_100000000_610000002662	0.126708	0.104119	0.473539		tdT+_210127_Slice1_Cell2_AP_100000000_610000003118	0.0817118	0.0695762	0.783126			tdT-_210126_Slice3_Cell1_AP001_100000000_610000002332	0.284668	0.13492	0.968677		tdT+_210129_Slice1_Cell1_AP001_100000000_610000005751	0.0672858	0.0404214	1.37698
tdT-_210128_Slice3_Cell1_AP002_100000000_610000002668	0.0478476	0.0347432	0.36586		tdT+_210127_Slice1_Cell2_AP_100000000_610000003141	0.039931	0.039817	0.509496			tdT-_210126_Slice3_Cell1_AP001_100000000_610000002344	0.0715152	0.0233821	0.703708		tdT+_210129_Slice1_Cell1_AP001_100000000_610000005783	0.148458	0.0196621	1.92566
tdT-_210128_Slice3_Cell1_AP002_100000000_610000002674	0.0548391	0.048814	0.361598		tdT+_210127_Slice1_Cell2_AP_100000000_610000001849	0.102902	0.0622857	1.6754			tdT-_210126_Slice3_Cell1_AP001_100000000_610000002360	0.336955	0.0724019	0.988283		tdT+_210129_Slice1_Cell1_AP001_100000000_610000005825	0.0467891	0.0275041	1.21217
tdT-_210128_Slice3_Cell1_AP002_100000000_610000002679	0.0573377	0.0417362	0.397926		tdT+_210127_Slice1_Cell2_AP_100000000_610000001890	0.0339868	0.0321209	0.829455			tdT-_210126_Slice3_Cell1_AP001_100000000_610000002374	0.296519	0.109704	0.83644		tdT+_210129_Slice1_Cell1_AP001_100000000_610000005856	0.182218	0.0996323	2.24825
tdT-_210128_Slice3_Cell1_AP002_100000000_610000002684	0.166619	0.0691029	0.767094		tdT+_210127_Slice1_Cell2_AP_100000000_610000001918	0.0764484	0.0445589	1.28458			tdT-_210126_Slice3_Cell1_AP001_100000000_610000002389	0.0518772	0.0301689	0.445896		tdT+_210129_Slice1_Cell1_AP001_100000000_610000006016	0.252012	0.179792	2.35074
tdT-_210128_Slice3_Cell1_AP002_100000000_610000002707	0.0511274	0.0481771	0.359675		tdT+_210127_Slice1_Cell2_AP_100000000_610000001957	0.237961	0.132932	1.83799			tdT-_210126_Slice3_Cell1_AP001_100000000_610000002400	0.0400594	0.0347559	0.375018		tdT+_210129_Slice1_Cell1_AP001_100000000_610000006167	0.109823	0.0855523	1.26518
tdT-_210128_Slice3_Cell1_AP002_100000000_610000002715	0.0635249	0.0486726	0.412299		tdT+_210127_Slice1_Cell2_AP_100000000_610000003223	0.0168233	0.0176332	0.454106			tdT-_210126_Slice3_Cell1_AP001_100000000_610000002412	0.069041	0.0644153	0.329826		tdT+_210129_Slice1_Cell1_AP001_100000000_610000006195	0.101983	0.0717221	1.40733
tdT-_210128_Slice3_Cell1_AP002_100000000_610000002722	0.0809573	0.0666388	0.4428		tdT+_210127_Slice1_Cell2_AP_100000000_610000003233	0.0967303	0.03256	1.18585			tdT-_210126_Slice3_Cell1_AP001_100000000_610000002415	0.0333268	0.0332131	0.298117		tdT+_210129_Slice1_Cell1_AP001_100000000_610000006222	0.183041	0.055798	1.69064
tdT-_210128_Slice3_Cell1_AP002_100000000_610000002728	0.0229736	0.0202545	0.26946		tdT+_210127_Slice1_Cell2_AP_100000000_610000003267	0.0516541	0.0407854	0.837813			tdT-_210126_Slice3_Cell1_AP001_100000000_610000002420	0.0631051	0.0368156	0.511505		tdT+_210129_Slice1_Cell1_AP001_100000000_610000006258	0.578438	0.116276	2.24038
tdT-_210128_Slice3_Cell1_AP002_100000000_610000002735	0.0525652	0.0689241	0.318915		tdT+_210127_Slice1_Cell2_AP_100000000_610000003294	0.0769825	0.0849832	0.507617			tdT-_210126_Slice3_Cell1_AP001_100000000_610000001478	0.222967	0.176771	2.18362		tdT+_210129_Slice1_Cell1_AP001_100000000_610000006288	0.207714	0.0650243	1.83656
tdT-_210128_Slice3_Cell1_AP002_100000000_610000002740	0.0485251	0.0451907	0.349588		tdT+_210127_Slice1_Cell2_AP_100000000_610000003315	0.045787	0.0449435	0.655318			tdT-_210126_Slice3_Cell1_AP001_100000000_610000001520	0.0194778	0.015328	0.979228		tdT+_210129_Slice1_Cell1_AP001_100000000_610000006351	0.0764877	0.0714708	0.899379
tdT-_210128_Slice3_Cell1_AP002_100000000_610000002746	0.047739	0.0601024	0.308031		tdT+_210127_Slice1_Cell2_AP_100000000_610000003336	0.0215086	0.0202392	0.716208			tdT-_210126_Slice3_Cell1_AP001_100000000_610000001545	0.296811	0.0502721	2.09891		tdT+_210129_Slice1_Cell1_AP001_100000000_610000006371	0.149017	0.083022	1.87277
tdT-_210128_Slice3_Cell1_AP003_100000000_610000000265	0.0944206	0.0382476	4.33413		tdT+_210127_Slice1_Cell2_AP_100000000_610000003358	0.021381	0.0333151	0.477976			tdT-_210126_Slice3_Cell1_AP001_100000000_610000001732	0.452222	0.291153	2.19497		tdT+_210129_Slice1_Cell1_AP001_100000000_610000006413	0.132116	0.01918	1.61065
tdT-_210128_Slice3_Cell1_AP003_100000000_610000000317	0.118607	0.0525575	3.97663		tdT+_210127_Slice1_Cell2_AP_100000000_610000003379	0.176644	0.0876506	1.64576			tdT-_210126_Slice3_Cell1_AP001_100000000_610000001774	0.0716955	0.0221132	1.07346		tdT+_210129_Slice1_Cell1_AP001_100000000_610000006443	0.258132	0.112031	1.73976
tdT-_210128_Slice3_Cell1_AP003_100000000_610000000363	0.105089	0.0378561	4.29825		tdT+_210127_Slice1_Cell2_AP_100000000_610000003416	0.166814	0.118054	0.852618			tdT-_210126_Slice3_Cell1_AP001_100000000_610000001798	0.171967	0.143274	1.54484		tdT+_210129_Slice1_Cell1_AP001_100000000_610000006478	0.23265	0.0939807	1.71423
tdT-_210128_Slice3_Cell1_AP003_100000000_610000000434	0.268006	0.0821235	4.37491		tdT+_210127_Slice1_Cell2_AP_100000000_610000000597	0.090024	0.0493359	2.62196			tdT-_210126_Slice3_Cell1_AP001_100000000_610000001828	0.253467	0.130533	2.17979		tdT+_210129_Slice1_Cell1_AP001_100000000_610000006514	0.0608436	0.0477281	1.01084
tdT-_210128_Slice3_Cell1_AP003_100000000_610000000527	0.0460829	0.0271657	1.62405		tdT+_210127_Slice1_Cell2_AP_100000000_610000000655	0.0489166	0.0233499	1.84076			tdT-_210126_Slice3_Cell1_AP001_100000000_610000001870	0.223694	0.113572	1.41943		tdT+_210129_Slice1_Cell1_AP001_100000000_610000006539	0.140956	0.0412172	1.35034
tdT-_210128_Slice3_Cell1_AP003_100000000_610000000562	0.0498289	0.0371369	1.96858		tdT+_210127_Slice1_Cell2_AP_100000000_610000000699	0.0697505	0.0377759	1.85811			tdT-_210126_Slice3_Cell1_AP001_100000000_610000001892	0.23202	0.0875287	1.7239		tdT+_210129_Slice1_Cell1_AP001_100000000_610000006570	0.190452	0.11108	1.52055
tdT-_210128_Slice3_Cell1_AP003_100000000_610000000608	0.12926	0.0408891	2.13375		tdT+_210127_Slice1_Cell2_AP_100000000_610000000745	0.106229	0.0663357	2.47407			tdT-_210126_Slice3_Cell1_AP001_100000000_610000001923	0.627826	0.237555	2.262		tdT+_210129_Slice1_Cell1_AP001_100000000_610000006600	0.12396	0.0745203	1.21991
tdT-_210128_Slice3_Cell1_AP003_100000000_610000000653	0.0342821	0.0266061	1.48918		tdT+_210127_Slice1_Cell2_AP_100000000_610000000805	0.0439677	0.034127	1.79629			tdT-_210126_Slice3_Cell1_AP001_100000000_610000001960	0.055314	0.0248355	1.23463		tdT+_210129_Slice1_Cell1_AP001_100000000_610000006628	0.0501414	0.041387	0.802766
tdT-_210128_Slice3_Cell1_AP003_100000000_610000000690	0.0304472	0.0255938	1.07667		tdT+_210127_Slice1_Cell2_AP_100000000_610000000849	0.501043	0.0586146	4.08658			tdT-_210126_Slice3_Cell1_AP001_100000000_610000001984	0.0540628	0.0208056	0.894853		tdT+_210129_Slice1_Cell1_AP001_100000000_610000006648	0.131218	0.0802197	1.21671
tdT-_210128_Slice3_Cell1_AP003_100000000_610000000704	0.0688536	0.0223281	1.81436		tdT+_210127_Slice1_Cell2_AP_100000000_610000000937	0.0326823	0.0293815	1.07461			tdT-_210126_Slice3_Cell1_AP001_100000000_610000002002	0.0892496	0.0376753	0.954008		tdT+_210129_Slice1_Cell1_AP001_100000000_610000006673	0.0595081	0.0363237	0.870378
tdT-_210128_Slice3_Cell1_AP003_100000000_610000000742	0.240843	0.0996824	3.25929		tdT+_210127_Slice1_Cell2_AP_100000000_610000000973	0.238741	0.134705	2.45788			tdT-_210126_Slice3_Cell1_AP001_100000000_610000002023	0.0250177	0.0191895	0.69484		tdT+_210129_Slice1_Cell1_AP001_100000000_610000006697	0.0362261	0.0287258	0.828472
tdT-_210128_Slice3_Cell1_AP003_100000000_610000000811	0.0289871	0.0244636	1.04634		tdT+_210127_Slice1_Cell2_AP_100000000_610000001032	0.0354321	0.0290268	1.35372			tdT-_210126_Slice3_Cell1_AP001_100000000_610000002040	0.137806	0.0791419	1.04724		tdT+_210129_Slice1_Cell1_AP001_100000000_610000006718	0.0909456	0.058494	0.974273
tdT-_210128_Slice3_Cell1_AP003_100000000_610000000841	0.186272	0.144718	2.06684		tdT+_210127_Slice1_Cell2_AP_100000000_610000001062	0.0410653	0.0213784	1.3971			tdT-_210126_Slice3_Cell1_AP001_100000000_610000002058	0.192981	0.113823	1.27124		tdT+_210129_Slice1_Cell1_AP001_100000000_610000006741	0.250675	0.154175	1.2393
tdT-_210128_Slice3_Cell1_AP003_100000000_610000000887	0.020937	0.0175801	0.85305		tdT+_210127_Slice1_Cell2_AP_100000000_610000001101	0.065768	0.039368	1.52309			tdT-_210126_Slice3_Cell1_AP001_100000000_610000002078	0.307182	0.104792	1.71709		tdT+_210129_Slice1_Cell1_AP001_100000000_610000006764	0.167234	0.0751141	1.37973
tdT-_210128_Slice3_Cell1_AP003_100000000_610000000909	0.200598	0.147403	1.51027		tdT+_210127_Slice1_Cell2_AP_100000000_610000001133	0.093665	0.0282862	1.89022			tdT-_210126_Slice3_Cell1_AP001_100000000_610000002451	0.0206779	0.0277503	0.323643		tdT+_210129_Slice1_Cell1_AP001_100000000_610000006793	0.247495	0.0383995	1.51511
tdT-_210128_Slice3_Cell1_AP003_100000000_610000000933	0.0248927	0.0210542	1.00527		tdT+_210127_Slice1_Cell2_AP_100000000_610000001182	0.192892	0.0752612	2.59201			tdT-_210126_Slice3_Cell1_AP001_100000000_610000002459	0.0277328	0.0351875	0.259352		tdT+_210129_Slice1_Cell1_AP001_100000000_610000006824	0.0755542	0.0312915	0.872807
tdT-_210128_Slice3_Cell1_AP003_100000000_610000000962	0.0811221	0.038409	1.55136		tdT+_210127_Slice1_Cell2_AP_100000000_610000001241	0.179884	0.118671	2.18481			tdT-_210126_Slice3_Cell1_AP001_100000000_610000002466	0.0774737	0.0835507	0.528152		tdT+_210129_Slice1_Cell1_AP001_100000000_610000006846	0.0967755	0.0674297	0.81081
tdT-_210128_Slice3_Cell1_AP003_100000000_610000001000	0.0821255	0.0689772	1.51093		tdT+_210127_Slice1_Cell2_AP_100000000_610000001285	0.245189	0.188923	2.68869			tdT-_210126_Slice3_Cell1_AP001_100000000_610000002140	0.458791	0.12626	1.36762		tdT+_210129_Slice1_Cell1_AP001_100000000_610000006865	0.0342738	0.023214	0.652403
tdT-_210128_Slice3_Cell1_AP003_100000000_610000001036	0.0240889	0.0198593	0.984526		tdT+_210127_Slice1_Cell2_AP_100000000_610000001347	0.0336422	0.0266449	1.18389			tdT-_210126_Slice3_Cell1_AP001_100000000_610000002155	0.0265155	0.0205355	0.550242		tdT+_210129_Slice1_Cell1_AP001_100000000_610000006883	0.0609787	0.0316774	0.679185
tdT-_210128_Slice3_Cell1_AP003_100000000_610000001065	0.0234079	0.0226491	0.56014		tdT+_210127_Slice1_Cell2_AP_100000000_610000001381	0.0313881	0.0253611	1.48688			tdT-_210126_Slice3_Cell1_AP001_100000000_610000002167	0.320731	0.112632	1.31823		tdT+_210129_Slice1_Cell1_AP001_100000000_610000006898	0.106036	0.0859321	0.778692
tdT-_210128_Slice3_Cell1_AP003_100000000_610000001082	0.0874128	0.0444501	1.62079		tdT+_210127_Slice1_Cell2_AP_100000000_610000001416	0.07074	0.0328897	1.78508			tdT-_210126_Slice3_Cell1_AP001_100000000_610000002185	0.228681	0.116573	1.40153		tdT+_210129_Slice1_Cell1_AP001_100000000_610000006918	0.0591668	0.0399394	0.494579
tdT-_210128_Slice3_Cell1_AP003_100000000_610000001118	0.323469	0.260458	2.36724		tdT+_210127_Slice1_Cell2_AP_100000000_610000001464	0.078494	0.0265934	1.69832			tdT-_210126_Slice3_Cell1_AP001_100000000_610000002437	0.125456	0.121455	0.522737		tdT+_210129_Slice1_Cell1_AP001_100000000_610000006933	0.116077	0.0647762	0.78243
tdT-_210128_Slice3_Cell1_AP003_100000000_610000001170	0.0781603	0.0602723	1.53117		tdT+_210127_Slice1_Cell2_AP_100000000_610000001509	0.0693536	0.0470444	1.60212			tdT-_210126_Slice3_Cell1_AP001_100000000_610000002445	0.0273635	0.0341043	0.273423		tdT+_210129_Slice1_Cell1_AP001_100000000_610000006952	0.0791336	0.0508968	0.549928
tdT-_210128_Slice3_Cell1_AP003_100000000_610000001202	0.0351489	0.0315526	1.02226		tdT+_210127_Slice1_Cell2_AP_100000000_610000001552	0.0845346	0.0425354	1.71297			tdT-_210126_Slice3_Cell1_AP001_100000000_610000002431	0.155109	0.0855305	0.689757		tdT+_210129_Slice1_Cell1_AP001_100000000_610000006966	0.0868554	0.0522256	0.652293
tdT-_210128_Slice3_Cell1_AP003_100000000_610000001231	0.0165578	0.0155805	0.596606		tdT+_210127_Slice1_Cell2_AP_100000000_610000001596	0.336369	0.269995	2.30083			tdT-_210126_Slice3_Cell1_AP002_100000000_610000001562	0.0405509	0.0187484	0.901401		tdT+_210129_Slice1_Cell1_AP001_100000000_610000006979	0.0630458	0.0238566	0.808938
tdT-_210128_Slice3_Cell1_AP003_100000000_610000001243	0.0514014	0.0217909	1.02244		tdT+_210127_Slice1_Cell2_AP_100000000_610000001647	0.111927	0.0579831	1.8798			tdT-_210126_Slice3_Cell1_AP002_100000000_610000001497	0.425366	0.23795	2.05781		tdT+_210129_Slice1_Cell1_AP001_100000000_610000007000	0.204334	0.101556	1.03432
tdT-_210128_Slice3_Cell1_AP003_100000000_610000001261	0.0680705	0.0398303	1.38865		tdT+_210127_Slice1_Cell2_AP_100000000_610000001690	0.098622	0.0305469	2.12691			tdT-_210126_Slice3_Cell1_AP002_100000000_610000001534	0.132644	0.0587964	1.29892		tdT+_210129_Slice1_Cell1_AP001_100000000_610000007024	0.187699	0.0649861	0.894519
tdT-_210128_Slice3_Cell1_AP003_100000000_610000001296	0.0303886	0.0284454	0.701725		tdT+_210127_Slice1_Cell2_AP_100000000_610000001738	0.0876693	0.0776739	1.39804			tdT-_210126_Slice3_Cell1_AP002_100000000_610000001315	0.12607	0.00844921	1.21472		tdT+_210129_Slice1_Cell1_AP001_100000000_610000007042	0.104415	0.0536403	0.737767
tdT-_210128_Slice3_Cell1_AP003_100000000_610000001318	0.0749536	0.0323443	1.56353		tdT+_210127_Slice1_Cell2_AP_100000000_610000001780	0.0239747	0.0206817	0.996229			tdT-_210126_Slice3_Cell1_AP002_100000000_610000001318	0.632146	0.221742	2.9004		tdT+_210129_Slice1_Cell1_AP001_100000000_610000007055	0.0723817	0.090047	0.502721
tdT-_210128_Slice3_Cell1_AP003_100000000_610000001353	0.044783	0.0388388	0.874983		tdT+_210127_Slice1_Cell2_AP_100000000_610000001811	0.0565137	0.029128	1.30001			tdT-_210126_Slice3_Cell1_AP002_100000000_610000001371	0.311011	0.193765	1.93206		tdT+_210129_Slice1_Cell1_AP001_100000000_610000007063	0.0680143	0.0533906	0.449635
tdT-_210128_Slice3_Cell1_AP003_100000000_610000001375	0.0613352	0.0250653	1.2548		tdT+_210127_Slice1_Cell2_AP_100000000_610000004000	0.0610595	0.0534709	0.693959			tdT-_210126_Slice3_Cell1_AP002_100000000_610000001723	0.551725	0.17354	1.9807		tdT+_210129_Slice1_Cell1_AP001_100000000_610000007072	0.147357	0.0547775	0.599914
tdT-_210128_Slice3_Cell1_AP003_100000000_610000001408	0.0501182	0.0458991	0.907521		tdT+_210127_Slice1_Cell2_AP_100000000_610000004024	0.0454417	0.107859	0.451034			tdT-_210126_Slice3_Cell1_AP002_100000000_610000001758	0.105096	0.0300163	1.06672		tdT+_210129_Slice1_Cell1_AP001_100000000_610000007079	0.0741525	0.0630981	0.41342
tdT-_210128_Slice3_Cell1_AP003_100000000_610000001428	0.0707504	0.036993	1.18855		tdT+_210127_Slice1_Cell2_AP_100000000_610000004037	0.0198967	0.0515226	0.470428			tdT-_210126_Slice3_Cell1_AP002_100000000_610000001778	0.222349	0.165252	0.78126		tdT+_210129_Slice1_Cell1_AP001_100000000_610000007084	0.0213236	0.05681	0.239354
tdT-_210128_Slice3_Cell1_AP003_100000000_610000001457	0.0749283	0.025065	1.43974		tdT+_210127_Slice1_Cell2_AP_100000000_610000004054	0.169164	0.273788	0.535108			tdT-_210126_Slice3_Cell1_AP002_100000000_610000001782	0.171488	0.09509	0.77827		tdT+_210129_Slice1_Cell1_AP001_100000000_610000007096	0.053824	0.086064	0.310279
tdT-_210128_Slice3_Cell1_AP003_100000000_610000001483	0.266567	0.209111	1.90701		tdT+_210127_Slice1_Cell2_AP_100000000_610000002002	0.117535	0.0991915	1.18655			tdT-_210126_Slice3_Cell1_AP002_100000000_610000001794	0.0361215	0.0183204	0.661583		tdT+_210129_Slice1_Cell1_AP001_100000000_610000007101	0.0473688	0.0538411	0.369025
tdT-_210128_Slice3_Cell1_AP003_100000000_610000001522	0.0359839	0.0215412	0.888577		tdT+_210127_Slice1_Cell2_AP_100000000_610000002029	0.109949	0.0412461	1.88283			tdT-_210126_Slice3_Cell1_AP002_100000000_610000001812	0.105447	0.0483356	0.723596		tdT+_210129_Slice1_Cell1_AP002_100000000_610000000330	0.28479	0.032346	3.94653
tdT-_210128_Slice3_Cell1_AP003_100000000_610000001540	0.0459374	0.0222912	0.90226		tdT+_210127_Slice1_Cell2_AP_100000000_610000002068	0.097767	0.0454623	1.39849			tdT-_210126_Slice3_Cell1_AP002_100000000_610000001825	0.0725938	0.0246364	0.603004		tdT+_210129_Slice1_Cell1_AP002_100000000_610000000407	0.290047	0.0578235	3.43818
tdT-_210128_Slice3_Cell1_AP003_100000000_610000001566	0.0745568	0.0417292	1.29048		tdT+_210127_Slice1_Cell2_AP_100000000_610000002107	0.0694449	0.0452048	1.35095			tdT-_210126_Slice3_Cell1_AP002_100000000_610000001579	0.288755	0.151393	1.23795		tdT+_210129_Slice1_Cell1_AP002_100000000_610000000470	0.233198	0.0948328	3.13712
tdT-_210128_Slice3_Cell1_AP003_100000000_610000001597	0.0947494	0.0723165	0.771443		tdT+_210127_Slice1_Cell2_AP_100000000_610000002145	0.0487673	0.0385332	1.20076			tdT-_210126_Slice3_Cell1_AP002_100000000_610000001599	0.26931	0.174504	1.37197		tdT+_210129_Slice1_Cell1_AP002_100000000_610000000525	0.175773	0.0552112	3.18288
tdT-_210128_Slice3_Cell1_AP003_100000000_610000001609	0.113495	0.0700618	1.75159		tdT+_210127_Slice1_Cell2_AP_100000000_610000002182	0.132333	0.0852569	1.46143			tdT-_210126_Slice3_Cell1_AP002_100000000_610000001624	0.148209	0.0665272	1.19553		tdT+_210129_Slice1_Cell1_AP002_100000000_610000000588	0.309859	0.111404	3.85788
tdT-_210128_Slice3_Cell1_AP003_100000000_610000001649	0.0191012	0.0177643	0.585443		tdT+_210127_Slice1_Cell2_AP_100000000_610000003648	0.0828656	0.108007	0.520123			tdT-_210126_Slice3_Cell1_AP002_100000000_610000001645	0.255857	0.113888	1.62956		tdT+_210129_Slice1_Cell1_AP002_100000000_610000000662	0.292016	0.157538	3.44819
tdT-_210128_Slice3_Cell1_AP003_100000000_610000001666	0.0388817	0.0315322	0.966617		tdT+_210127_Slice1_Cell2_AP_100000000_610000003659	0.0558101	0.0484798	0.625381			tdT-_210126_Slice3_Cell1_AP002_100000000_610000001675	0.0427617	0.0198893	0.748662		tdT+_210129_Slice1_Cell1_AP002_100000000_610000000725	0.357035	0.209337	3.8711
tdT-_210128_Slice3_Cell1_AP003_100000000_610000001689	0.186767	0.0506647	2.05827		tdT+_210127_Slice1_Cell2_AP_100000000_610000003678	0.0216078	0.0262797	0.471782			tdT-_210126_Slice3_Cell1_AP002_100000000_610000001689	0.351995	0.144531	1.79989		tdT+_210129_Slice1_Cell1_AP002_100000000_610000000795	0.106573	0.0373305	1.91798
tdT-_210128_Slice3_Cell1_AP003_100000000_610000001738	0.0538596	0.0218581	1.23722		tdT+_210127_Slice1_Cell2_AP_100000000_610000003694	0.523913	0.244485	1.32908			tdT-_210126_Slice3_Cell1_AP002_100000000_610000001912	0.0344492	0.0228471	0.34985		tdT+_210129_Slice1_Cell1_AP002_100000000_610000000836	0.3979	0.208456	4.33242
tdT-_210128_Slice3_Cell1_AP003_100000000_610000001765	0.0130371	0.0146701	0.274467		tdT+_210127_Slice1_Cell2_AP_100000000_610000003725	0.0923889	0.0256082	1.02171			tdT-_210126_Slice3_Cell1_AP002_100000000_610000001918	0.264942	0.0876853	0.879679		tdT+_210129_Slice1_Cell1_AP002_100000000_610000000923	0.215412	0.108763	3.05052
tdT-_210128_Slice3_Cell1_AP003_100000000_610000001774	0.0444354	0.0209888	0.996831		tdT+_210127_Slice1_Cell2_AP_100000000_610000003755	0.352438	0.120078	1.60948			tdT-_210126_Slice3_Cell1_AP002_100000000_610000001933	0.0627706	0.0432337	0.38407		tdT+_210129_Slice1_Cell1_AP002_100000000_610000000980	0.341566	0.191093	3.32842
tdT-_210128_Slice3_Cell1_AP003_100000000_610000001801	0.0508848	0.0332549	0.89745		tdT+_210127_Slice1_Cell2_AP_100000000_610000003786	0.111069	0.122099	0.579606			tdT-_210126_Slice3_Cell1_AP002_100000000_610000001937	0.185704	0.0680968	0.864998		tdT+_210129_Slice1_Cell1_AP002_100000000_610000001044	0.131425	0.0402734	2.00974
tdT-_210128_Slice3_Cell1_AP003_100000000_610000001827	0.0768156	0.0278141	0.953369		tdT+_210127_Slice1_Cell2_AP_100000000_610000003832	0.0134681	0.0404618	0.328123			tdT-_210126_Slice3_Cell1_AP002_100000000_610000001950	0.0465078	0.0317396	0.358892		tdT+_210129_Slice1_Cell1_AP002_100000000_610000001085	0.236039	0.137243	2.42343
tdT-_210128_Slice3_Cell1_AP003_100000000_610000001848	0.0370975	0.0246455	0.626131		tdT+_210127_Slice1_Cell2_AP_100000000_610000003848	0.101692	0.110583	0.528535			tdT-_210126_Slice3_Cell1_AP002_100000000_610000001105	0.140978	0.0593705	1.85916		tdT+_210129_Slice1_Cell1_AP002_100000000_610000001131	0.161497	0.0786107	2.18779
tdT-_210128_Slice3_Cell1_AP003_100000000_610000001863	0.196152	0.139153	1.79204		tdT+_210127_Slice1_Cell2_AP_100000000_610000003860	0.0790008	0.170666	0.557877			tdT-_210126_Slice3_Cell1_AP002_100000000_610000001134	0.0629714	0.0445822	1.19167		tdT+_210129_Slice1_Cell1_AP002_100000000_610000001176	0.276834	0.137259	2.75548
tdT-_210128_Slice3_Cell1_AP003_100000000_610000001903	0.058926	0.0271256	1.20539		tdT+_210127_Slice1_Cell2_AP_100000000_610000003876	0.033497	0.0324585	0.469346			tdT-_210126_Slice3_Cell1_AP002_100000000_610000001158	0.0692859	0.0223852	1.08631		tdT+_210129_Slice1_Cell1_AP002_100000000_610000001227	0.176993	0.0889698	2.53198
tdT-_210128_Slice3_Cell1_AP003_100000000_610000001934	0.0224089	0.0206678	0.647645		tdT+_210127_Slice1_Cell2_AP_100000000_610000003898	0.109742	0.0606801	0.590043			tdT-_210126_Slice3_Cell1_AP002_100000000_610000001175	0.155696	0.10207	1.3285		tdT+_210129_Slice1_Cell1_AP002_100000000_610000001275	0.120235	0.0581237	2.20969
tdT-_210128_Slice3_Cell1_AP003_100000000_610000001956	0.0666223	0.0316076	0.979469		tdT+_210127_Slice1_Cell2_AP_100000000_610000003909	0.0510823	0.0385126	0.833983			tdT-_210126_Slice3_Cell1_AP002_100000000_610000001197	0.0935466	0.0450959	1.21254		tdT+_210129_Slice1_Cell1_AP002_100000000_610000001320	0.0527719	0.0344149	0.847128
tdT-_210128_Slice3_Cell1_AP003_100000000_610000001981	0.0288313	0.0283608	0.599987		tdT+_210127_Slice1_Cell2_AP_100000000_610000003938	0.0692234	0.0829419	0.437776			tdT-_210126_Slice3_Cell1_AP002_100000000_610000001223	0.360973	0.251915	2.08748		tdT+_210129_Slice1_Cell1_AP002_100000000_610000001330	0.0652922	0.0270106	1.49499
tdT-_210128_Slice3_Cell1_AP003_100000000_610000001998	0.0202209	0.0213695	0.454422		tdT+_210127_Slice1_Cell2_AP_100000000_610000003948	0.0198556	0.032265	0.370671			tdT-_210126_Slice3_Cell1_AP002_100000000_610000001261	0.120196	0.045431	1.34508		tdT+_210129_Slice1_Cell1_AP002_100000000_610000001359	0.235399	0.0986762	2.61334
tdT-_210128_Slice3_Cell1_AP003_100000000_610000002008	0.0630655	0.0303586	0.645153		tdT+_210127_Slice1_Cell2_AP_100000000_610000003968	0.018522	0.0757014	0.364974			tdT-_210126_Slice3_Cell1_AP002_100000000_610000001288	0.115118	0.0682001	1.38544		tdT+_210129_Slice1_Cell1_AP002_100000000_610000001408	0.163964	0.0738738	2.0173
tdT-_210128_Slice3_Cell1_AP003_100000000_610000002021	0.053303	0.0255628	0.756353		tdT+_210127_Slice1_Cell2_AP_100000000_610000003981	0.089303	0.0529567	0.732226			tdT-_210126_Slice3_Cell1_AP002_100000000_610000001898	0.201741	0.0941334	0.860483		tdT+_210129_Slice1_Cell1_AP002_100000000_610000001448	0.158402	0.0665665	1.98158
tdT-_210128_Slice3_Cell1_AP003_100000000_610000002038	0.0223823	0.0222038	0.51316		tdT+_210127_Slice1_Cell2_AP_100000000_610000004070	0.0822532	0.150873	0.626945			tdT-_210126_Slice3_Cell1_AP002_100000000_610000001399	0.170937	0.0445692	1.44635		tdT+_210129_Slice1_Cell1_AP002_100000000_610000001487	0.065558	0.0206054	1.23863
tdT-_210128_Slice3_Cell1_AP003_100000000_610000002056	0.0760517	0.0329986	0.936459		tdT+_210127_Slice1_Cell2_AP_100000000_610000004085	0.0284751	0.0302296	0.474232			tdT-_210126_Slice3_Cell1_AP002_100000000_610000001426	0.135477	0.0476146	1.26831		tdT+_210129_Slice1_Cell1_AP002_100000000_610000001508	0.174571	0.0551062	2.12413
tdT-_210128_Slice3_Cell1_AP003_100000000_610000002084	0.123038	0.0838641	1.192		tdT+_210127_Slice1_Cell2_AP_100000000_610000004105	0.0283796	0.0726319	0.300338			tdT-_210126_Slice3_Cell1_AP002_100000000_610000001448	0.0639401	0.0243351	1.25062		tdT+_210129_Slice1_Cell1_AP002_100000000_610000001553	0.184341	0.0689228	2.16326
tdT-_210128_Slice3_Cell1_AP003_100000000_610000002116	0.172608	0.0700097	0.980617		tdT+_210127_Slice1_Cell2_AP_100000000_610000004124	0.038584	0.0552635	0.352976			tdT-_210126_Slice3_Cell1_AP002_100000000_610000001476	0.0935405	0.0557998	1.0559		tdT+_210129_Slice1_Cell1_AP002_100000000_610000001596	0.26076	0.0989891	2.64363
tdT-_210128_Slice3_Cell1_AP003_100000000_610000002136	0.0377609	0.0352333	0.612913		tdT+_210127_Slice1_Cell2_AP_100000000_610000004141	0.0558774	0.0746317	0.391349			tdT-_210126_Slice3_Cell1_AP002_100000000_610000001093	0.0481514	0.0283047	0.940193		tdT+_210129_Slice1_Cell1_AP002_100000000_610000001648	0.0483662	0.0256441	0.900099
tdT-_210128_Slice3_Cell1_AP003_100000000_610000002153	0.0352545	0.0216103	0.734105		tdT+_210127_Slice1_Cell2_AP001_100000000_610000001193	0.210932	0.239014	0.579423			tdT-_210126_Slice3_Cell1_AP002_100000000_610000001860	0.0259759	0.0167717	0.530572		tdT+_210129_Slice1_Cell1_AP002_100000000_610000001664	0.126112	0.0623932	1.39062
tdT-_210128_Slice3_Cell1_AP003_100000000_610000002172	0.0498686	0.0274763	0.778116		tdT+_210127_Slice1_Cell2_AP001_100000000_610000001201	0.1012	0.111306	0.418505			tdT-_210126_Slice3_Cell1_AP002_100000000_610000001872	0.192551	0.0739343	0.794339		tdT+_210129_Slice1_Cell1_AP002_100000000_610000001690	0.053021	0.0264826	0.962378
tdT-_210128_Slice3_Cell1_AP003_100000000_610000002191	0.137723	0.101689	0.996215		tdT+_210127_Slice1_Cell2_AP001_100000000_610000001206	0.0825405	0.0819737	0.379099			tdT-_210126_Slice3_Cell1_AP002_100000000_610000001833	0.0947073	0.0696492	0.715087		tdT+_210129_Slice1_Cell1_AP002_100000000_610000001707	0.47585	0.0717621	2.85224
tdT-_210128_Slice3_Cell1_AP003_100000000_610000002211	0.036737	0.0289625	0.795166		tdT+_210127_Slice1_Cell2_AP001_100000000_610000001186	0.102353	0.0920647	0.427801			tdT-_210126_Slice3_Cell1_AP002_100000000_610000001846	0.0914772	0.0319595	0.687304		tdT+_210129_Slice1_Cell1_AP002_100000000_610000001763	0.0503363	0.0208395	1.11468
tdT-_210128_Slice3_Cell1_AP003_100000000_610000002237	0.0255606	0.0227975	0.497234		tdT+_210127_Slice1_Cell2_AP001_100000000_610000001145	0.214414	0.125378	0.749842			tdT-_210126_Slice3_Cell1_AP002_100000000_610000000942	0.0591284	0.0317924	1.21676		tdT+_210129_Slice1_Cell1_AP002_100000000_610000001785	0.0352963	0.0183771	0.591308
tdT-_210128_Slice3_Cell1_AP003_100000000_610000002255	0.0293201	0.041078	0.462827		tdT+_210127_Slice1_Cell2_AP001_100000000_610000001158	0.173067	0.153402	0.536545			tdT-_210126_Slice3_Cell1_AP002_100000000_610000000959	0.163439	0.0244024	2.82492		tdT+_210129_Slice1_Cell1_AP002_100000000_610000001792	0.305498	0.130481	2.13464
tdT-_210128_Slice3_Cell1_AP003_100000000_610000002269	0.0493059	0.0389631	0.627825		tdT+_210127_Slice1_Cell2_AP001_100000000_610000001169	0.070216	0.0694398	0.387388			tdT-_210126_Slice3_Cell1_AP002_100000000_610000001887	0.146726	0.0524673	0.646304		tdT+_210129_Slice1_Cell1_AP002_100000000_610000001834	0.113292	0.0462183	1.4784
tdT-_210128_Slice3_Cell1_AP003_100000000_610000002290	0.0323933	0.0235417	0.531		tdT+_210127_Slice1_Cell2_AP001_100000000_610000001177	0.101056	0.1048	0.454618			tdT-_210126_Slice3_Cell1_AP002_100000000_610000001050	0.40499	0.292534	2.23589		tdT+_210129_Slice1_Cell1_AP002_100000000_610000001863	0.232163	0.0514156	1.7348
tdT-_210128_Slice3_Cell1_AP003_100000000_610000002309	0.0367039	0.0363677	0.428936		tdT+_210127_Slice1_Cell2_AP001_100000000_610000001009	0.288658	0.160479	0.8835			tdT-_210126_Slice3_Cell1_AP002_100000000_610000000997	0.343328	0.231992	2.71257		tdT+_210129_Slice1_Cell1_AP002_100000000_610000001894	0.107027	0.0484424	1.14671
tdT-_210128_Slice3_Cell1_AP003_100000000_610000002326	0.0649127	0.0564857	0.625267		tdT+_210127_Slice1_Cell2_AP001_100000000_610000001021	0.191047	0.0680053	0.804399			tdT-_210126_Slice3_Cell1_AP003_100000000_610000001682	0.0461819	0.0278799	0.756276		tdT+_210129_Slice1_Cell1_AP002_100000000_610000001916	0.150848	0.0314631	1.16654
tdT-_210128_Slice3_Cell1_AP003_100000000_610000002342	0.0228556	0.0296287	0.338267		tdT+_210127_Slice1_Cell2_AP001_100000000_610000001032	0.103166	0.0857542	0.539027			tdT-_210126_Slice3_Cell1_AP003_100000000_610000001781	0.129571	0.0337019	1.04234		tdT+_210129_Slice1_Cell1_AP002_100000000_610000001941	0.13669	0.07051	1.23758
tdT-_210128_Slice3_Cell1_AP003_100000000_610000002353	0.0765019	0.0519821	0.670269		tdT+_210127_Slice1_Cell2_AP001_100000000_610000001046	0.0458844	0.0363853	0.47268			tdT-_210126_Slice3_Cell1_AP003_100000000_610000000914	0.0329627	0.0270702	0.861264		tdT+_210129_Slice1_Cell1_AP002_100000000_610000001963	0.0669168	0.0276533	0.917174
tdT-_210128_Slice3_Cell1_AP003_100000000_610000002374	0.0731598	0.0578557	0.685843		tdT+_210127_Slice1_Cell2_AP001_100000000_610000000552	0.128932	0.10095	0.884994			tdT-_210126_Slice3_Cell1_AP003_100000000_610000001611	0.0701179	0.0342186	0.99507		tdT+_210129_Slice1_Cell1_AP002_100000000_610000001982	0.0420454	0.0214047	0.575693
tdT-_210128_Slice3_Cell1_AP003_100000000_610000002394	0.0600984	0.0489146	0.656728		tdT+_210127_Slice1_Cell2_AP001_100000000_610000000564	0.146629	0.0982923	1.20497			tdT-_210126_Slice3_Cell1_AP003_100000000_610000000395	0.110254	0.0663095	2.37127		tdT+_210129_Slice1_Cell1_AP002_100000000_610000001992	0.0418983	0.022603	0.625076
tdT-_210128_Slice3_Cell1_AP003_100000000_610000002415	0.0616215	0.0409292	0.684919		tdT+_210127_Slice1_Cell2_AP001_100000000_610000000586	0.181818	0.121903	1.36873			tdT-_210126_Slice3_Cell1_AP003_100000000_610000000451	0.215228	0.158223	2.75322		tdT+_210129_Slice1_Cell1_AP002_100000000_610000002004	0.082091	0.0447621	0.643532
tdT-_210128_Slice3_Cell1_AP003_100000000_610000002434	0.035322	0.0496303	0.350874		tdT+_210127_Slice1_Cell2_AP001_100000000_610000000615	0.388624	0.181029	1.8365			tdT-_210126_Slice3_Cell1_AP003_100000000_610000001884	0.0438752	0.0676846	0.321545		tdT+_210129_Slice1_Cell1_AP002_100000000_610000002018	0.171291	0.0932791	0.696037
tdT-_210128_Slice3_Cell1_AP003_100000000_610000002450	0.0546751	0.0450031	0.573749		tdT+_210127_Slice1_Cell2_AP001_100000000_610000000651	0.0464219	0.0330942	0.683553			tdT-_210126_Slice3_Cell1_AP003_100000000_610000001892	0.223134	0.0862227	1.05035		tdT+_210129_Slice1_Cell1_AP002_100000000_610000002028	0.110825	0.0322661	0.716219
tdT-_210128_Slice3_Cell1_AP003_100000000_610000002467	0.0215159	0.0365203	0.363909		tdT+_210127_Slice1_Cell2_AP001_100000000_610000000304	0.170513	0.0931285	2.59338			tdT-_210126_Slice3_Cell1_AP003_100000000_610000001915	0.046285	0.0638885	0.375362		tdT+_210129_Slice1_Cell1_AP002_100000000_610000002045	0.22618	0.0672128	1.20271
tdT-_210128_Slice3_Cell1_AP003_100000000_610000002483	0.0280142	0.0337286	0.355772		tdT+_210127_Slice1_Cell2_AP001_100000000_610000000357	0.0959037	0.064683	1.13768			tdT-_210126_Slice3_Cell1_AP003_100000000_610000001927	0.0982016	0.0336947	1.04486		tdT+_210129_Slice1_Cell1_AP002_100000000_610000002067	0.046788	0.0259448	0.560455
tdT-_210128_Slice3_Cell1_AP003_100000000_610000002497	0.0451423	0.0340905	0.590173		tdT+_210127_Slice1_Cell2_AP001_100000000_610000000378	0.253734	0.0385806	1.91407			tdT-_210126_Slice3_Cell1_AP003_100000000_610000001954	0.162973	0.0722526	0.883901		tdT+_210129_Slice1_Cell1_AP002_100000000_610000002079	0.132462	0.0683782	0.80202
tdT-_210128_Slice3_Cell1_AP003_100000000_610000002515	0.0307322	0.0372977	0.356513		tdT+_210127_Slice1_Cell2_AP001_100000000_610000000414	0.0834696	0.0468813	1.22877			tdT-_210126_Slice3_Cell1_AP003_100000000_610000001978	0.08097	0.0411291	0.670673		tdT+_210129_Slice1_Cell1_AP002_100000000_610000002095	0.0327258	0.0162678	0.407241
tdT-_210128_Slice3_Cell1_AP003_100000000_610000002530	0.0799991	0.0631219	0.725211		tdT+_210127_Slice1_Cell2_AP001_100000000_610000000439	0.147939	0.0501496	1.29356			tdT-_210126_Slice3_Cell1_AP003_100000000_610000002013	0.0805962	0.0976532	0.491815		tdT+_210129_Slice1_Cell1_AP002_100000000_610000002102	0.149599	0.077962	0.75433
tdT-_210128_Slice3_Cell1_AP003_100000000_610000002551	0.042607	0.0782989	0.361385		tdT+_210127_Slice1_Cell2_AP001_100000000_610000000464	0.144077	0.0711417	1.34963			tdT-_210126_Slice3_Cell1_AP003_100000000_610000000940	0.124836	0.0574367	1.72285		tdT+_210129_Slice1_Cell1_AP002_100000000_610000002115	0.106926	0.0438209	0.548039
tdT-_210128_Slice3_Cell1_AP003_100000000_610000002565	0.00958701	0.022619	0.215055		tdT+_210127_Slice1_Cell2_AP001_100000000_610000000491	0.23992	0.0699431	1.33392			tdT-_210126_Slice3_Cell1_AP003_100000000_610000000977	0.0178375	0.021212	0.550039		tdT+_210129_Slice1_Cell1_AP002_100000000_610000002124	0.0910307	0.0409332	0.571294
tdT-_210128_Slice3_Cell1_AP003_100000000_610000002575	0.0603138	0.0705369	0.490552		tdT+_210127_Slice1_Cell2_AP001_100000000_610000000512	0.0992688	0.0595712	1.15677			tdT-_210126_Slice3_Cell1_AP003_100000000_610000001195	0.100075	0.071912	1.52111		tdT+_210129_Slice1_Cell1_AP002_100000000_610000002134	0.0516857	0.0218266	0.491863
tdT-_210128_Slice3_Cell1_AP003_100000000_610000002594	0.0662739	0.0878337	0.479805		tdT+_210127_Slice1_Cell2_AP001_100000000_610000000534	0.239928	0.115404	1.3329			tdT-_210126_Slice3_Cell1_AP003_100000000_610000001231	0.171125	0.0783904	2.1984		tdT+_210129_Slice1_Cell1_AP002_100000000_610000002141	0.0329892	0.0275299	0.317559
tdT-_210128_Slice3_Cell1_AP003_100000000_610000002610	0.0314515	0.0557638	0.366588		tdT+_210127_Slice1_Cell2_AP001_100000000_610000000859	0.229455	0.129601	1.06332			tdT-_210126_Slice3_Cell1_AP003_100000000_610000001556	0.354961	0.186201	2.6324		tdT+_210129_Slice1_Cell1_AP002_100000000_610000002147	0.0506621	0.0480738	0.404881
tdT-_210204_Slice2_Cell1_AP001_100000000_610000001086	0.367862	0.19749	3.37091		tdT+_210127_Slice1_Cell2_AP001_100000000_610000000876	0.0960896	0.0730167	0.705179			tdT-_210126_Slice3_Cell1_AP003_100000000_610000000667	0.0888668	0.036847	1.23028		tdT+_210129_Slice1_Cell1_AP002_100000000_610000002155	0.0198308	0.0223885	0.258688
tdT-_210204_Slice2_Cell1_AP001_100000000_610000001145	0.550288	0.472339	2.93029		tdT+_210127_Slice1_Cell2_AP001_100000000_610000000892	0.306039	0.117051	1.05184			tdT-_210126_Slice3_Cell1_AP003_100000000_610000000516	0.175332	0.056474	3.17097		tdT+_210129_Slice1_Cell1_AP002_100000000_610000002159	0.0444469	0.0369513	0.343043
tdT-_210204_Slice2_Cell1_AP001_100000000_610000001191	0.519418	0.12972	2.98008		tdT+_210127_Slice1_Cell2_AP001_100000000_610000000903	0.14083	0.0943032	0.837022			tdT-_210126_Slice3_Cell1_AP003_100000000_610000000577	0.0815559	0.0342178	2.01417		tdT+_210129_Slice1_Cell1_AP002_100000000_610000002165	0.0507764	0.049104	0.342668
tdT-_210204_Slice2_Cell1_AP001_100000000_610000001222	0.532934	0.450726	3.33295		tdT+_210127_Slice1_Cell2_AP001_100000000_610000000922	0.0765938	0.0548877	0.712668			tdT-_210126_Slice3_Cell1_AP003_100000000_610000000628	0.239376	0.0233628	1.94081		tdT+_210129_Slice1_Cell1_AP002_100000000_610000002170	0.0112434	0.00951572	0.186225
tdT-_210204_Slice2_Cell1_AP001_100000000_610000001290	0.358574	0.0381892	2.34396		tdT+_210127_Slice1_Cell2_AP001_100000000_610000000660	0.23622	0.090244	1.46457			tdT-_210126_Slice3_Cell1_AP003_100000000_610000000698	0.0184602	0.0170448	0.719682		tdT+_210129_Slice1_Cell1_AP002_100000000_610000002178	0.0572276	0.070931	0.315235
tdT-_210204_Slice2_Cell1_AP001_100000000_610000001330	0.212778	0.0611309	2.35626		tdT+_210127_Slice1_Cell2_AP001_100000000_610000000688	0.205871	0.0912743	1.27753			tdT-_210126_Slice3_Cell1_AP003_100000000_610000000721	0.0410656	0.0173256	0.898124		tdT+_210129_Slice1_Cell1_AP003_100000000_610000000608	0.836386	0.297828	4.74917
tdT-_210204_Slice2_Cell1_AP001_100000000_610000001376	0.507462	0.196276	2.72139		tdT+_210127_Slice1_Cell2_AP001_100000000_610000000710	0.0987516	0.0496727	0.90294			tdT-_210126_Slice4_Cell1_AP_100000000_610000000713	0.556359	0.357216	3.49821		tdT+_210129_Slice1_Cell1_AP003_100000000_610000000701	0.108473	0.0911871	1.85177
tdT-_210204_Slice2_Cell1_AP001_100000000_610000001425	0.154988	0.11572	2.00153		tdT+_210127_Slice1_Cell2_AP001_100000000_610000000733	0.261122	0.12566	1.37272			tdT-_210126_Slice4_Cell1_AP_100000000_610000001783	0.534597	0.155753	1.71996		tdT+_210129_Slice1_Cell1_AP003_100000000_610000000739	0.196397	0.140129	2.98039
tdT-_210204_Slice2_Cell1_AP001_100000000_610000001461	0.467675	0.158137	2.57081		tdT+_210127_Slice1_Cell2_AP001_100000000_610000000760	0.147298	0.08935	1.0564			tdT-_210126_Slice4_Cell1_AP_100000000_610000000457	0.347718	0.100407	4.03271		tdT+_210129_Slice1_Cell1_AP003_100000000_610000000790	0.177441	0.125863	2.50945
tdT-_210204_Slice2_Cell1_AP001_100000000_610000001507	0.149173	0.125556	1.59239		tdT+_210127_Slice1_Cell2_AP001_100000000_610000000784	0.239351	0.143818	1.50732			tdT-_210126_Slice4_Cell1_AP_100000000_610000000528	0.108169	0.0727711	1.95224		tdT+_210129_Slice1_Cell1_AP003_100000000_610000000839	0.0718758	0.037547	1.81357
tdT-_210204_Slice2_Cell1_AP001_100000000_610000001540	0.101782	0.0855707	1.51163		tdT+_210127_Slice1_Cell2_AP001_100000000_610000000815	0.256763	0.157701	1.19346			tdT-_210126_Slice4_Cell1_AP_100000000_610000000565	1.12182	0.284243	4.49719		tdT+_210129_Slice1_Cell1_AP003_100000000_610000000875	0.654652	0.0447727	3.63649
tdT-_210204_Slice2_Cell1_AP001_100000000_610000001565	0.188747	0.119286	1.70496		tdT+_210127_Slice1_Cell2_AP001_100000000_610000000841	0.462395	0.142464	1.30177			tdT-_210126_Slice4_Cell1_AP_100000000_610000000636	0.14346	0.0374824	2.21721		tdT+_210129_Slice1_Cell1_AP003_100000000_610000000933	0.16924	0.0815808	1.95812
tdT-_210204_Slice2_Cell1_AP001_100000000_610000001600	0.206	0.12328	1.97031		tdT+_210127_Slice1_Cell2_AP001_100000000_610000001058	0.341448	0.15015	0.893583			tdT-_210126_Slice4_Cell1_AP_100000000_610000000679	0.233572	0.0567287	2.3118		tdT+_210129_Slice1_Cell1_AP003_100000000_610000000971	0.128369	0.0361923	1.98688
tdT-_210204_Slice2_Cell1_AP001_100000000_610000001641	0.344422	0.226467	1.92251		tdT+_210127_Slice1_Cell2_AP001_100000000_610000001070	0.14744	0.09932	0.658878			tdT-_210126_Slice4_Cell1_AP_100000000_610000001898	0.36543	0.241307	2.2544		tdT+_210129_Slice1_Cell1_AP003_100000000_610000001007	0.796019	0.230036	4.38573
tdT-_210204_Slice2_Cell1_AP001_100000000_610000001679	0.19036	0.136938	1.56076		tdT+_210127_Slice1_Cell2_AP001_100000000_610000001078	0.0503289	0.0344124	0.424038			tdT-_210126_Slice4_Cell1_AP_100000000_610000001943	0.075853	0.0353784	1.06298		tdT+_210129_Slice1_Cell1_AP003_100000000_610000001092	0.36332	0.067068	2.51662
[truncated: 4,552 more rows]

## Sheet: Table S1
Table S1
[truncated: 34 more rows]

## Sheet: Table S2
Table S2
[truncated: 34 more rows]

## Sheet: Fig. S1
Fig. S1
Panel b											Panel c
		Freezing (%)
group	Animal	00:00-2:00	2:00-4:00	4:00-6:00	6:00-8:00	8:00-10:00	10:00-12:00	12:00-14:00	14:00-15:00		group	Animal	Δfreezing (%/min)
[truncated: 30 more rows]

## Sheet: Fig. S2
Fig. S2
[truncated: 40 more rows]

[truncated: 2 more sheets: Fig. S3, Fig. S4]
